# Supplementary material for: The Fas–FADD–caspase-8 axis is a cancer cell-intrinsic determinant of cytotoxic lymphocyte–mediated killing
Source: bioRxiv preprint, doi:10.64898/2026.06.14.732110, version 2 (2026-07-15)
Supplement: Supplementary Table I [file 732110_file03.xlsx]

## Sheet: sel3_norm_with_ctrl_no_ctrl4.ge
id	num	neg|score	neg|p-value	neg|fdr	neg|rank	neg|goodsgrna	neg|lfc	pos|score	pos|p-value	pos|fdr	pos|rank	pos|goodsgrna	pos|lfc
Spi1	4	1	1	1	19646	0	10.837	4.1e-18	2.4e-07	0.000183	1	4	10.837
Fcer1g	4	1	1	1	19645	0	9.0974	1.75e-12	2.4e-07	0.000183	2	4	9.0974
Bap1	4	1	1	1	19644	0	6.7949	7.22e-12	2.4e-07	0.000183	3	4	6.7949
Fcgr1	4	1	1	1	19643	0	5.5613	3.17e-11	2.4e-07	0.000183	4	4	5.5613
Sec62	4	1	1	1	19642	0	4.6975	5.47e-11	2.4e-07	0.000183	5	4	4.6975
Kmt2c	4	1	1	1	19641	0	4.8718	7.98e-11	2.4e-07	0.000183	6	4	4.8718
Fcgr3	4	1	1	1	19640	0	4.3007	5.61e-10	2.4e-07	0.000183	7	4	4.3007
Rybp	4	1	1	1	19639	0	3.8265	8.79e-10	2.4e-07	0.000183	8	4	3.8265
Taf4a	4	1	1	1	19638	0	6.1067	1.42e-09	2.4e-07	0.000183	9	4	6.1067
Rara	4	1	1	1	19637	0	3.477	2.98e-09	2.4e-07	0.000183	10	4	3.477
Tm9sf2	4	1	1	1	19636	0	3.7632	5.14e-09	2.4e-07	0.000183	11	4	3.7632
Rbm26	4	1	1	1	19635	0	3.0481	7.08e-09	2.4e-07	0.000183	12	4	3.0481
Atxn2l	4	1	1	1	19634	0	4.1243	2.46e-08	2.4e-07	0.000183	13	4	4.1243
Nsun2	4	1	1	1	19633	0	3.9242	3.88e-08	2.4e-07	0.000183	14	4	3.9242
Fas	4	1	1	1	19630	0	5.3393	4.75e-08	2.4e-07	0.000183	15	4	5.3393
Tnrc6a	4	0.0075638	0.0082731	0.133462	1231	1	4.1846	5.5e-08	2.4e-07	0.000183	16	3	4.1846
Sppl3	4	1	1	1	19632	0	2.9067	1.04e-07	2.4e-07	0.000183	17	4	2.9067
Tpt1	4	1	1	1	19631	0	2.8314	1.6e-07	2.4e-07	0.000183	18	4	2.8314
Slc4a7	4	0.60362	0.56358	0.862581	13447	1	4.3386	1.73e-07	2.4e-07	0.000183	19	3	4.3386
Icam1	4	1	1	1	19629	0	2.6393	3.98e-07	2.4e-07	0.000183	20	4	2.6393
Nelfe	4	1	1	1	19628	0	3.7696	5.13e-07	2.4e-07	0.000183	21	4	3.7696
Cdc42	4	0.99975	0.99942	1	19576	0	4.4521	7.43e-07	2.4e-07	0.000183	22	4	4.4521
Cs	4	1	1	1	19627	0	2.8411	1.27e-06	2.4e-07	0.000183	23	4	2.8411
Creb1	4	1	1	1	19626	0	2.1573	1.57e-06	2.4e-07	0.000183	24	4	2.1573
Brk1	4	1	1	1	19625	0	2.4053	1.78e-06	2.4e-07	0.000183	25	4	2.4053
Foxa1	4	1	1	1	19624	0	1.9654	2.02e-06	2.4e-07	0.000183	26	4	1.9654
Ggta1	4	1	1	1	19623	0	2.796	2.55e-06	3.12e-06	0.002298	27	4	2.796
Nptn	4	1	1	1	19622	0	3.3311	2.59e-06	4.32e-06	0.003034	28	4	3.3311
Slc35c1	4	1	1	1	19621	0	2.4295	2.61e-06	4.56e-06	0.003034	29	4	2.4295
Tfap4	4	1	0.99999	1	19620	0	3.4874	2.84e-06	4.56e-06	0.003034	30	4	3.4874
Fli1	4	0.99998	0.99997	1	19611	0	3.3108	5.33e-06	1.18e-05	0.007013	31	4	3.3108
Papola	4	0.99953	0.99875	1	19561	0	2.8526	5.99e-06	1.22e-05	0.007013	32	4	2.8526
Mob4	4	0.99999	0.99999	1	19619	0	3.5163	6.38e-06	1.22e-05	0.007013	33	4	3.5163
Pdcl	4	0.99999	0.99999	1	19618	0	2.4774	6.39e-06	1.22e-05	0.007013	34	4	2.4774
Tal1	4	0.99807	0.99508	1	19494	0	3.1819	6.42e-06	1.22e-05	0.007013	35	4	3.1819
Fbxo48	4	0.99999	0.99999	1	19617	0	2.5619	6.91e-06	1.37e-05	0.007626	36	4	2.5619
Mplkip	4	0.99999	0.99999	1	19616	0	2.2071	7.66e-06	1.46e-05	0.007947	37	4	2.2071
Eif2a	4	0.99999	0.99999	1	19615	0	2.1106	9.36e-06	1.75e-05	0.009035	38	4	2.1106
Bid	4	0.99999	0.99999	1	19614	0	2.4184	9.51e-06	1.75e-05	0.009035	39	4	2.4184
Pik3r1	4	0.99996	0.99994	1	19604	0	2.8659	1.13e-05	2.47e-05	0.012437	40	4	2.8659
Fadd	4	0.99999	0.99998	1	19613	0	2.8801	1.22e-05	2.76e-05	0.013164	41	4	2.8801
Actr3	4	0.99999	0.99998	1	19612	0	3.0672	1.29e-05	2.81e-05	0.013164	42	4	3.0672
Ncoa6	4	0.995	0.98635	1	19388	0	2.8937	1.3e-05	2.81e-05	0.013164	43	4	2.8937
Brd2	4	0.97409	0.93804	1	18802	0	3.4187	1.53e-05	3.62e-05	0.015986	44	3	3.4187
Pih1d1	4	0.99998	0.99996	1	19608	0	3.0738	1.62e-05	3.67e-05	0.015986	45	4	3.0738
Ang5	4	0.99998	0.99997	1	19610	0	1.6641	1.66e-05	3.72e-05	0.015986	46	4	1.6641
Ccz1	4	0.99998	0.99997	1	19609	0	1.9652	1.66e-05	3.72e-05	0.015986	47	4	1.9652
Taf7	4	0.7159	0.67144	0.922791	14957	1	2.732	1.93e-05	4.34e-05	0.017764	48	2	2.732
Uchl5	4	0.999	0.99727	1	19532	0	2.585	1.98e-05	4.34e-05	0.017764	49	4	2.585
Rnf219	4	0.99988	0.99976	1	19589	0	2.4896	2.1e-05	4.39e-05	0.017764	50	4	2.4896
Foxn2	4	0.99105	0.97736	1	19273	0	2.5386	2.74e-05	5.01e-05	0.019522	51	4	2.5386
Irf2bp2	3	0.99997	0.99995	1	19607	0	2.3136	3.32e-05	5.01e-05	0.019522	52	3	2.3136
L3mbtl3	4	0.99997	0.99995	1	19606	0	2.0388	3.43e-05	7.7e-05	0.029073	53	4	2.0388
Fbxo11	4	0.99996	0.99995	1	19605	0	1.9985	3.53e-05	7.75e-05	0.029073	54	4	1.9985
Srf	4	0.99975	0.99941	1	19575	0	2.9678	3.65e-05	8.57e-05	0.031179	55	4	2.9678
Stk4	4	0.94769	0.88425	1	18111	0	2.2189	3.81e-05	8.61e-05	0.031179	56	3	2.2189
Irf2bp1	4	0.99996	0.99994	1	19603	0	1.8036	3.99e-05	9.24e-05	0.032861	57	4	1.8036
Pxk	4	0.93858	0.87166	1	17924	0	2.2927	4.33e-05	9.67e-05	0.033814	58	3	2.2927
Safb2	4	0.99996	0.99993	1	19602	0	2.1729	4.39e-05	0.00010341	0.034978	59	4	2.1729
Rfx1	4	0.99996	0.99993	1	19601	0	1.6591	4.39e-05	0.00010341	0.034978	60	4	1.6591
Ctdspl2	4	0.99996	0.99993	1	19600	0	2.547	4.5e-05	0.00010773	0.035851	61	4	2.547
Pced1b	4	0.99995	0.99993	1	19599	0	2.3009	5.2e-05	0.00012308	0.039681	62	4	2.3009
Nelfa	4	0.9999	0.99983	1	19592	0	3.0424	5.51e-05	0.000149	0.047296	63	4	3.0424
Dnajb12	4	0.99994	0.9999	1	19598	0	1.6959	5.95e-05	0.00015907	0.04973	64	4	1.6959
Zic2	4	0.99993	0.99989	1	19597	0	1.781	7.45e-05	0.00019458	0.059923	65	4	1.781
Lbh	4	0.99992	0.99987	1	19596	0	1.7155	7.92e-05	0.00023801	0.071172	66	4	1.7155
Pan2	4	0.99992	0.99986	1	19595	0	2.0974	8.03e-05	0.00024737	0.072914	67	4	2.0974
6430548M08Rik	4	0.99991	0.99984	1	19594	0	1.2732	8.91e-05	0.00027904	0.080102	68	4	1.2732
Ss18	4	0.99991	0.99984	1	19593	0	1.9983	9.14e-05	0.00027952	0.080102	69	4	1.9983
Taf6	4	0.95999	0.9038	1	18423	0	3.6191	9.8e-05	0.00030495	0.084026	70	3	3.6191
Tbc1d14	4	0.71836	0.67238	0.922837	14981	1	2.0488	9.86e-05	0.00030543	0.084026	71	3	2.0488
Olfr1339	4	0.80985	0.72653	0.945537	15831	1	2.8556	9.99e-05	0.00030543	0.084026	72	3	2.8556
Hnrnpa2b1	4	0.98617	0.96671	1	19132	0	2.5775	0.00010251	0.00031119	0.084484	73	4	2.5775
Fzr1	4	0.99989	0.9998	1	19591	0	2.1319	0.00010938	0.00035726	0.095731	74	4	2.1319
Arpc5	4	0.99022	0.97592	1	19244	0	2.0018	0.00011217	0.00036829	0.097423	75	4	2.0018
Taf2	2	0.99988	0.99989	1	19590	0	6.7897	0.00011511	0.00011445	0.037482	76	2	6.7897
Trap1a	4	0.98693	0.96821	1	19157	0	1.8774	0.00012602	0.0004729	0.122296	77	4	1.8774
Samd1	4	0.99987	0.99971	1	19588	0	1.8504	0.00012888	0.00047962	0.122296	78	4	1.8504
Whsc1	3	0.99987	0.99981	1	19587	0	2.252	0.00012963	0.00019794	0.060061	79	3	2.252
Nudt2	4	0.99709	0.99254	1	19448	0	2.1328	0.00013015	0.0004801	0.122296	80	4	2.1328
Cradd	4	0.99986	0.99971	1	19586	0	1.6096	0.00013794	0.0004945	0.12424	81	4	1.6096
Wdr37	4	0.99986	0.9997	1	19585	0	1.8084	0.00014051	0.00049978	0.12424	82	4	1.8084
Trmt2a	4	0.99985	0.99968	1	19584	0	1.5251	0.0001492	0.00051609	0.126768	83	4	1.5251
Smarcad1	4	0.99983	0.99962	1	19583	0	1.4437	0.0001671	0.00057655	0.138326	84	4	1.4437
Olfr853	4	0.99982	0.99958	1	19582	0	1.5749	0.00017937	0.00062982	0.147784	85	4	1.5749
Usp9x	4	0.99982	0.99958	1	19581	0	2.1932	0.00018089	0.0006303	0.147784	86	4	2.1932
Ahcyl2	4	0.99981	0.99957	1	19580	0	1.3938	0.00018896	0.00066965	0.155245	87	4	1.3938
Olfr111	4	0.9998	0.99955	1	19579	0	1.4765	0.00019568	0.0006826	0.156491	88	4	1.4765
Stard10	4	0.9995	0.99873	1	19558	0	2.3807	0.00021924	0.00080929	0.183495	89	4	2.3807
Mapk6	4	0.63828	0.60761	0.888573	14064	1	2.2916	0.00023468	0.00088319	0.198074	90	3	2.2916
3110002H16Rik	4	0.99976	0.99942	1	19578	0	1.3632	0.00024221	0.00095804	0.208181	91	4	1.3632
Nabp2	4	0.99976	0.99942	1	19577	0	1.3725	0.00024311	0.00095804	0.208181	92	4	1.3725
9230110F15Rik	4	0.99941	0.99846	1	19552	0	1.8503	0.0002446	0.00095852	0.208181	93	4	1.8503
Dctpp1	4	0.62397	0.59197	0.881311	13793	2	1.1917	0.00025024	0.0010185	0.214538	94	2	1.1917
Baz2a	4	0.99975	0.99941	1	19574	0	1.3769	0.00025442	0.001019	0.214538	95	4	1.3769
Prrt1	4	0.95632	0.89806	1	18314	0	2.4857	0.0002562	0.001019	0.214538	96	3	2.4857
Stk35	4	0.87543	0.78264	0.965781	16683	1	2.1672	0.00026163	0.0010348	0.215672	97	3	2.1672
Khdrbs1	3	0.99974	0.99962	1	19573	0	1.8622	0.0002619	0.00056744	0.13774	98	3	1.8622
Rnf5	4	0.76798	0.69843	0.931762	15439	1	2.2964	0.00027141	0.0011298	0.233119	99	3	2.2964
Hhex	4	0.99125	0.97757	1	19278	0	2.0712	0.00028046	0.0011821	0.236807	100	4	2.0712
Taf8	4	0.65531	0.62812	0.897495	14378	1	2.1997	0.00028074	0.0011821	0.236807	101	2	2.1997
Fstl5	4	0.98085	0.95537	1	19000	0	1.4776	0.00028281	0.0011975	0.237576	102	3	1.4776
Kit	4	0.84809	0.75559	0.955629	16306	1	3.645	0.00028849	0.0012167	0.239085	103	3	3.645
Ascl4	4	0.9997	0.99928	1	19572	0	1.916	0.00029613	0.001244	0.242154	104	4	1.916
Crebbp	4	0.99969	0.99924	1	19571	0	2.1445	0.00030791	0.0013597	0.262191	105	4	2.1445
Rnls	4	0.99968	0.99923	1	19570	0	1.2012	0.00031807	0.0013914	0.265814	106	4	1.2012
Zhx1	4	0.99819	0.99557	1	19503	0	1.9282	0.00032412	0.0014758	0.274418	107	4	1.9282
Ugcg	4	0.99967	0.99922	1	19569	0	1.3326	0.000331	0.0014763	0.274418	108	4	1.3326
Strip2	4	0.72975	0.67608	0.922837	15077	1	0.15402	0.00033423	0.001495	0.275415	109	2	0.15402
Lrrc16b	4	0.74348	0.68441	0.925816	15211	1	2.0432	0.00035169	0.0016116	0.291688	110	3	2.0432
Gcc1	4	0.99962	0.99903	1	19568	0	1.7749	0.00037702	0.0017124	0.303977	111	4	1.7749
Smarcc1	4	0.99962	0.99899	1	19567	0	1.7402	0.00037855	0.0017527	0.303977	112	4	1.7402
Gnb2	4	0.99962	0.99899	1	19566	0	1.8112	0.00038009	0.0017527	0.303977	113	4	1.8112
Hook2	4	0.99962	0.99899	1	19565	0	1.2642	0.00038093	0.0017527	0.303977	114	4	1.2642
Aup1	4	0.99962	0.99899	1	19564	0	1.4537	0.00038275	0.0017532	0.303977	115	4	1.4537
Gosr2	4	0.26302	0.27702	0.679865	8323	2	-0.61945	0.00038564	0.0017705	0.304414	116	2	-0.61945
Cdkn1a	4	0.9996	0.99894	1	19563	0	1.7618	0.00039572	0.0017964	0.306317	117	4	1.7618
Asxl1	4	0.86671	0.7715	0.961143	16566	1	2.5136	0.00040615	0.0019106	0.323121	118	3	2.5136
Tmem209	4	0.95347	0.89505	1	18240	0	1.4933	0.00043553	0.0019897	0.333776	119	2	1.4933
Gigyf1	4	0.98308	0.96064	1	19050	0	1.887	0.00045055	0.0021207	0.338284	120	3	1.887
Rps6kb1	4	0.99955	0.9988	1	19562	0	1.555	0.00045378	0.0021207	0.338284	121	4	1.555
H2afb2	4	0.93846	0.87166	1	17917	0	2.2516	0.00045391	0.0021207	0.338284	122	3	2.2516
Marveld1	4	0.62722	0.59607	0.883583	13853	2	1.4413	0.00046057	0.0021212	0.338284	123	2	1.4413
1700088E04Rik	4	0.91833	0.8386	0.991099	17452	1	1.8209	0.00047121	0.0021659	0.338284	124	3	1.8209
Fbxo22	4	0.99503	0.98635	1	19390	0	1.4481	0.00048846	0.0021894	0.338284	125	4	1.4481
Zic5	4	0.99951	0.99873	1	19560	0	1.2677	0.00049017	0.0021894	0.338284	126	4	1.2677
Vrk3	4	0.99951	0.99873	1	19559	0	1.3726	0.00049084	0.0021894	0.338284	127	4	1.3726
Pcdhb16	4	0.98022	0.95498	1	18983	0	1.441	0.00050289	0.0022129	0.338284	128	3	1.441
Tln1	4	0.99926	0.99799	1	19544	0	2.231	0.00050485	0.0022129	0.338284	129	4	2.231
Rbpjl	4	0.16849	0.18044	0.598876	6107	2	1.2937	0.00050849	0.0022134	0.338284	130	2	1.2937
Dtx3l	4	0.99469	0.98602	1	19378	0	1.6113	0.00051694	0.0022134	0.338284	131	4	1.6113
Uckl1	4	0.99946	0.99862	1	19557	0	1.7929	0.00053899	0.0023544	0.354593	132	4	1.7929
Hyou1	4	0.12854	0.13941	0.538581	5240	3	-2.367	0.00053986	0.0023544	0.354593	133	1	-2.367
Qk	4	0.99946	0.99859	1	19556	0	1.4256	0.00054446	0.0024091	0.357682	134	4	1.4256
Kcnh5	4	0.99945	0.99859	1	19555	0	0.8785	0.00055165	0.0024096	0.357682	135	4	0.8785
Gip	4	0.93138	0.8619	1	17753	0	1.8495	0.00056328	0.0024768	0.36251	136	3	1.8495
Tbpl1	4	0.9986	0.99662	1	19513	0	2.1884	0.00056532	0.0024773	0.36251	137	4	2.1884
Cdkn1b	4	0.89824	0.80975	0.976817	17075	1	1.7115	0.00058401	0.002568	0.36298	138	3	1.7115
Lppr1	4	0.99941	0.99846	1	19554	0	1.3816	0.00058981	0.002568	0.36298	139	4	1.3816
Psme3	4	0.99941	0.99846	1	19553	0	1.1663	0.00059332	0.0025685	0.36298	140	4	1.1663
Fmnl1	4	0.72673	0.67608	0.922837	15054	1	1.8735	0.00059388	0.0025685	0.36298	141	3	1.8735
Muc15	4	0.66325	0.63823	0.90389	14523	1	2.2237	0.00060065	0.0025685	0.36298	142	3	2.2237
Ccbl1	3	0.9994	0.99923	1	19551	0	1.6445	0.00060333	0.0011572	0.236398	143	3	1.6445
Ttf1	4	0.97703	0.94782	1	18885	0	2.4072	0.00060982	0.0025982	0.364686	144	3	2.4072
Wdtc1	4	0.99939	0.99843	1	19550	0	1.6582	0.00061171	0.002628	0.36637	145	4	1.6582
Extl1	4	0.99938	0.99836	1	19549	0	1.6236	0.00062137	0.0027004	0.373945	146	4	1.6236
Hes2	4	0.77177	0.70032	0.932472	15476	1	0.059677	0.00064267	0.0027978	0.381318	147	2	0.059677
Rsf1	4	0.91689	0.83671	0.990863	17421	1	1.7127	0.00064757	0.0027983	0.381318	148	3	1.7127
Zfp953	4	0.99934	0.99826	1	19548	0	1.1394	0.00065565	0.0028276	0.381318	149	4	1.1394
Tmem33	4	0.99392	0.98418	1	19354	0	1.593	0.00065607	0.0028276	0.381318	150	4	1.593
Dupd1	4	0.82484	0.73975	0.950082	16003	1	1.3053	0.00066149	0.0028641	0.383728	151	2	1.3053
Phf21a	4	0.99933	0.99818	1	19547	0	1.492	0.00067353	0.0029404	0.391408	152	4	1.492
Cd163	4	0.70855	0.66578	0.919111	14907	1	1.6529	0.00068016	0.0031395	0.410045	153	3	1.6529
Pcdhgc5	4	0.98769	0.96936	1	19180	0	1.7433	0.00068569	0.00314	0.410045	154	4	1.7433
Fam65a	4	0.63169	0.59924	0.883583	13933	1	0.042128	0.00069407	0.0031716	0.411576	155	1	0.042128
Nelfb	3	0.9266	0.85301	0.996047	17626	0	3.3331	0.00069678	0.0015142	0.276483	156	2	3.3331
Aspa	4	0.99928	0.9981	1	19546	0	0.96383	0.00071802	0.003317	0.425158	157	4	0.96383
Tmbim6	4	0.99928	0.9981	1	19545	0	1.0979	0.00072051	0.0033175	0.425158	158	4	1.0979
Got1	4	0.85498	0.76216	0.9586	16405	1	1.9002	0.00073441	0.0034591	0.440564	159	3	1.9002
Hk3	4	0.99926	0.99796	1	19543	0	1.0223	0.00073762	0.0035392	0.448005	160	4	1.0223
Cebpb	4	0.99925	0.99784	1	19542	0	1.7846	0.00075363	0.0036505	0.450979	161	4	1.7846
Ubd	4	0.99925	0.99784	1	19541	0	2.0982	0.00075386	0.0036505	0.450979	162	4	2.0982
Olfr697	4	0.72157	0.67421	0.922837	15011	1	1.6259	0.0007554	0.0036505	0.450979	163	3	1.6259
Fam120b	4	0.3774	0.37614	0.756507	10194	1	1.5638	0.00077228	0.0037628	0.450979	164	3	1.5638
1700123O20Rik	4	0.79337	0.71529	0.938179	15687	1	2.0351	0.00078737	0.0038027	0.450979	165	3	2.0351
Il1f6	4	0.41184	0.3976	0.769356	10632	1	1.5829	0.00078788	0.0038027	0.450979	166	3	1.5829
Tfpt	4	0.9992	0.99772	1	19540	0	1.5279	0.00079516	0.0038027	0.450979	167	4	1.5279
Tekt3	4	0.47985	0.45224	0.803431	11600	2	-0.14596	0.00079686	0.0038027	0.450979	168	2	-0.14596
Fermt3	4	0.88676	0.79198	0.968698	16869	1	2.7975	0.00079958	0.0038027	0.450979	169	3	2.7975
Dach1	4	0.99919	0.99772	1	19539	0	1.5798	0.00081062	0.0038031	0.450979	170	4	1.5798
Btbd3	4	0.99918	0.99772	1	19538	0	1.5207	0.00081557	0.0038031	0.450979	171	4	1.5207
Cdcp2	4	0.99454	0.9852	1	19375	0	1.4479	0.0008317	0.0038948	0.451524	172	4	1.4479
Emp1	4	0.96659	0.91894	1	18608	0	1.3781	0.00083223	0.0038948	0.451524	173	3	1.3781
Lypd4	4	0.99029	0.97592	1	19247	0	1.7221	0.00083433	0.0038948	0.451524	174	4	1.7221
Thap7	4	0.99916	0.99772	1	19537	0	1.1868	0.00083813	0.0038953	0.451524	175	4	1.1868
Fndc5	4	0.83987	0.74719	0.951707	16192	1	0.39909	0.00084826	0.0039322	0.453261	176	2	0.39909
Rassf10	4	0.99915	0.99764	1	19536	0	1.2051	0.0008519	0.0039759	0.455748	177	4	1.2051
Dmrtb1	4	0.99913	0.99759	1	19535	0	1.7859	0.00086947	0.0040699	0.456227	178	4	1.7859
Prosc	4	0.99616	0.99	1	19414	0	1.6621	0.00088091	0.0040704	0.456227	179	4	1.6621
Zbtb44	4	0.99912	0.99759	1	19534	0	1.1876	0.00088283	0.0040704	0.456227	180	4	1.1876
Camsap3	4	0.40459	0.39442	0.767986	10534	1	1.6463	0.00088309	0.0040704	0.456227	181	3	1.6463
Atp2b1	4	0.99868	0.99683	1	19515	0	1.994	0.00089571	0.0042561	0.456227	182	4	1.994
Fam46a	4	0.9991	0.9975	1	19533	0	1.366	0.00089767	0.0042561	0.456227	183	4	1.366
Fam212b	4	0.95133	0.89206	1	18188	0	0.47745	0.00089965	0.0042561	0.456227	184	2	0.47745
Trim34b	4	0.98876	0.972	1	19206	0	1.411	0.00091289	0.0043032	0.456227	185	4	1.411
Mitf	4	0.98833	0.97029	1	19198	0	1.7916	0.00093558	0.0043895	0.456227	186	4	1.7916
Cyp1a2	4	0.44903	0.42798	0.790892	11111	2	0.051148	0.00095104	0.00439	0.456227	187	2	0.051148
Klra5	4	0.99734	0.99322	1	19454	0	1.8149	0.00095824	0.00439	0.456227	188	4	1.8149
Mien1	4	0.9442	0.88015	1	18044	0	1.5542	0.00095939	0.00439	0.456227	189	3	1.5542
Trp53	4	0.99898	0.99727	1	19531	0	1.2935	0.00099025	0.0044778	0.456227	190	4	1.2935
Tm2d1	4	0.98318	0.96064	1	19055	0	1.7972	0.00099556	0.0044778	0.456227	191	3	1.7972
Gstm4	4	0.84867	0.75559	0.955629	16314	1	0.76062	0.0010024	0.0044778	0.456227	192	3	0.76062
Alcam	4	0.9769	0.94693	1	18881	0	2.204	0.0010134	0.0044778	0.456227	193	3	2.204
Dnajc3	4	0.51415	0.4776	0.813674	12087	2	0.9541	0.0010386	0.0044783	0.456227	194	2	0.9541
Klhl20	4	0.99361	0.98399	1	19344	0	1.684	0.0010527	0.0044783	0.456227	195	4	1.684
Gcdh	4	0.44358	0.42562	0.790892	11027	2	-0.26079	0.0010538	0.0044783	0.456227	196	1	-0.26079
Mlph	4	0.99894	0.99727	1	19530	0	0.98017	0.0010557	0.0044783	0.456227	197	4	0.98017
Arfgap2	4	0.78331	0.70783	0.935837	15593	1	1.3108	0.0010667	0.0044783	0.456227	198	2	1.3108
Nrk	4	0.99893	0.99727	1	19529	0	0.99161	0.0010742	0.0045253	0.456227	199	4	0.99161
Accs	4	0.34286	0.34657	0.731089	9715	1	1.8132	0.0010768	0.0045253	0.456227	200	3	1.8132
Ube2s	4	0.91187	0.83022	0.988659	17323	1	1.6526	0.0010911	0.0045724	0.456227	201	3	1.6526
Ssr4	4	0.99283	0.98134	1	19322	0	1.5812	0.0010968	0.0045724	0.456227	202	4	1.5812
Papolg	4	0.9989	0.99722	1	19528	0	1.2787	0.0011035	0.0046208	0.456227	203	4	1.2787
Zfp354c	4	0.22143	0.23329	0.648021	7344	2	-0.59471	0.0011052	0.0046208	0.456227	204	2	-0.59471
Ptpra	4	0.99889	0.99722	1	19527	0	1.1273	0.0011066	0.0046208	0.456227	205	4	1.1273
Axin1	4	0.99889	0.99722	1	19526	0	1.9955	0.0011106	0.0046213	0.456227	206	4	1.9955
Rps14	1	0.99889	1	1	19525	0	8.7306	0.0011121	2.4e-07	0.000183	207	1	8.7306
Rabep1	4	0.99885	0.99707	1	19524	0	1.2237	0.001149	0.0048205	0.469446	208	4	1.2237
Jag2	4	0.86285	0.76863	0.960217	16509	1	0.92962	0.0011566	0.0048209	0.469446	209	3	0.92962
S100pbp	3	0.99882	0.99784	1	19523	0	1.6856	0.0011796	0.0030478	0.403116	210	3	1.6856
2310061I04Rik	4	0.96031	0.90449	1	18434	0	1.589	0.0011971	0.0049299	0.469446	211	3	1.589
Apol7c	4	0.99879	0.99707	1	19522	0	1.2992	0.0012062	0.0049299	0.469446	212	4	1.2992
Olfr64	4	0.25036	0.26656	0.679237	8033	2	0.22487	0.001208	0.0049299	0.469446	213	2	0.22487
Slc2a3	4	0.94362	0.88015	1	18024	0	1.7235	0.0012105	0.0049299	0.469446	214	3	1.7235
Cthrc1	4	0.99878	0.99707	1	19521	0	1.1143	0.0012182	0.0049299	0.469446	215	4	1.1143
Rps10	2	0.99878	0.99859	1	19520	0	4.6365	0.0012215	0.001413	0.267463	216	2	4.6365
Ascl3	4	0.99876	0.99702	1	19519	0	1.3128	0.0012371	0.0050278	0.469446	217	4	1.3128
Tmem91	4	0.99875	0.99702	1	19518	0	1.2556	0.0012531	0.0050278	0.469446	218	4	1.2556
Cep120	4	0.0011627	0.00033518	0.013049	528	2	-3.523	0.0012593	0.0050282	0.469446	219	2	-3.523
Sos1	4	0.98639	0.96731	1	19135	0	2.0308	0.0012605	0.0050282	0.469446	220	4	2.0308
Tango2	4	0.99873	0.99702	1	19517	0	0.97279	0.0012655	0.0050282	0.469446	221	4	0.97279
Rasgef1a	4	0.9987	0.99687	1	19516	0	1.2105	0.0012968	0.0051727	0.480132	222	4	1.2105
Zfx	4	0.99779	0.99462	1	19480	0	1.6302	0.0013005	0.005212	0.480132	223	4	1.6302
Prl4a1	4	0.6929	0.65461	0.912242	14764	1	0.41326	0.0013107	0.0052125	0.480132	224	2	0.41326
Rbl1	4	0.93642	0.87079	1	17870	0	1.6696	0.0013189	0.0052686	0.481008	225	3	1.6696
Fbxo31	4	0.81953	0.73503	0.950082	15948	1	1.6414	0.0013217	0.0052686	0.481008	226	3	1.6414
Slc48a1	4	0.99395	0.98435	1	19356	0	1.49	0.0013253	0.0053272	0.481971	227	4	1.49
Taf13	4	0.20933	0.22124	0.640123	7077	2	-0.21126	0.0013361	0.0053277	0.481971	228	2	-0.21126
Omt2a	4	0.6861	0.65	0.908886	14715	1	1.6369	0.001341	0.0053771	0.482372	229	3	1.6369
Kpna2	4	0.72753	0.67608	0.922837	15060	1	2.0234	0.0013568	0.0055105	0.485931	230	3	2.0234
Taf5	4	0.95062	0.89053	1	18172	0	1.7779	0.0013621	0.005511	0.485931	231	3	1.7779
Vit	4	0.99864	0.99672	1	19514	0	0.93418	0.0013624	0.005511	0.485931	232	4	0.93418
Zfp608	4	0.22337	0.23443	0.648021	7392	2	0.42643	0.0013633	0.005511	0.485931	233	2	0.42643
Wasf2	4	0.97772	0.94957	1	18905	0	2.0729	0.0013845	0.005606	0.489188	234	3	2.0729
Fan1	4	0.22541	0.23565	0.648021	7431	1	1.731	0.0013862	0.005606	0.489188	235	3	1.731
Gnai2	4	0.9962	0.99	1	19417	0	1.7356	0.0014066	0.005666	0.489188	236	4	1.7356
Rfxank	4	0.078957	0.082057	0.413654	4082	3	-1.0888	0.0014135	0.0056664	0.489188	237	1	-1.0888
Ferd3l	4	0.99858	0.99656	1	19512	0	0.72398	0.0014239	0.0056664	0.489188	238	4	0.72398
Ubp1	4	0.99855	0.99656	1	19511	0	1.2735	0.0014482	0.0057312	0.491281	239	4	1.2735
Ccnt2	4	0.99854	0.9965	1	19510	0	0.99313	0.0014635	0.0057855	0.491281	240	4	0.99313
Vmn1r124	4	0.28018	0.29366	0.688542	8725	2	-0.67516	0.0014648	0.0057855	0.491281	241	2	-0.67516
Tbxas1	4	0.99851	0.9965	1	19509	0	1.0386	0.0014864	0.0057859	0.491281	242	4	1.0386
Fbxw20	4	0.9985	0.9965	1	19508	0	1.1501	0.0015008	0.0059227	0.491361	243	4	1.1501
Skint6	4	0.80314	0.71996	0.940776	15775	1	1.7129	0.0015042	0.0059227	0.491361	244	3	1.7129
Olfr967	4	0.90129	0.81164	0.976817	17139	1	1.5286	0.0015151	0.0059232	0.491361	245	3	1.5286
Sox21	4	0.984	0.96205	1	19074	0	1.488	0.0015162	0.0059232	0.491361	246	3	1.488
Plcl2	4	0.99848	0.9965	1	19507	0	0.93517	0.0015213	0.0059232	0.491361	247	4	0.93517
Fam185a	4	0.96521	0.91641	1	18566	0	1.5455	0.001525	0.0059769	0.491361	248	3	1.5455
Olfr519	4	0.50451	0.47211	0.812628	11968	1	1.3621	0.0015267	0.0059769	0.491361	249	3	1.3621
Prrc2c	4	0.99546	0.98791	1	19400	0	1.631	0.001537	0.0059774	0.491361	250	4	1.631
Slc12a3	4	0.97045	0.92608	1	18700	0	1.9038	0.0015491	0.0060374	0.492369	251	3	1.9038
Rpgr	4	0.99845	0.99644	1	19506	0	0.75596	0.0015508	0.0060374	0.492369	252	4	0.75596
Greb1l	4	0.19443	0.19912	0.605616	6727	2	0.62407	0.0015637	0.0062907	0.507058	253	2	0.62407
Tfcp2l1	4	0.99843	0.99631	1	19505	0	0.74409	0.0015654	0.0062907	0.507058	254	4	0.74409
D17Wsu92e	4	0.63263	0.59924	0.883583	13953	1	0.15238	0.0015676	0.0062912	0.507058	255	2	0.15238
Npffr2	4	0.95617	0.89731	1	18311	0	1.2786	0.0015892	0.0063589	0.510517	256	3	1.2786
Crabp2	4	0.0072058	0.0082016	0.133462	1196	1	0.095216	0.0016189	0.006535	0.520605	257	1	0.095216
Slpi	4	0.89671	0.80602	0.976376	17040	1	1.1622	0.0016426	0.0065883	0.522829	258	2	1.1622
Cox8a	4	0.9148	0.83302	0.988938	17378	1	1.2049	0.0016703	0.0067764	0.535697	259	2	1.2049
Sult2a7	4	0.89136	0.80135	0.975383	16954	1	1.7262	0.0016853	0.0070369	0.554172	260	3	1.7262
Arl2bp	4	0.95205	0.89432	1	18207	0	1.5488	0.0017056	0.0071598	0.559575	261	2	1.5488
Naa40	4	0.99699	0.99243	1	19445	0	1.9366	0.0017074	0.0071598	0.559575	262	4	1.9366
Edem2	4	0.52529	0.48938	0.822756	12235	1	1.3418	0.0017142	0.0072294	0.560765	263	3	1.3418
Svep1	4	0.62071	0.58988	0.881311	13748	2	0.60375	0.0017217	0.0072294	0.560765	264	2	0.60375
Hectd3	4	0.98487	0.96377	1	19100	0	1.5319	0.0017678	0.0074789	0.569453	265	3	1.5319
Klc3	4	0.94826	0.88589	1	18127	0	0.33445	0.001773	0.0074789	0.569453	266	2	0.33445
Degs2	4	0.88433	0.79011	0.968698	16824	1	1.3977	0.0017807	0.0074794	0.569453	267	3	1.3977
Shank1	4	0.9982	0.99564	1	19504	0	1.015	0.0017956	0.0074794	0.569453	268	4	1.015
Fezf1	4	0.99819	0.99557	1	19502	0	1.3638	0.0018064	0.0075475	0.572528	269	4	1.3638
Ywhae	4	0.99818	0.9955	1	19501	0	1.4142	0.001819	0.0076108	0.575013	270	4	1.4142
Prdm4	4	0.99818	0.99544	1	19500	0	0.98478	0.0018249	0.0076656	0.575013	271	4	0.98478
Foxk2	4	0.99816	0.99544	1	19499	0	0.85129	0.0018354	0.007666	0.575013	272	4	0.85129
Aip	4	0.98676	0.96792	1	19146	0	1.9816	0.0018515	0.0077414	0.575013	273	4	1.9816
Elmsan1	4	0.99776	0.99462	1	19478	0	1.8276	0.0018641	0.0078033	0.575013	274	4	1.8276
2810403A07Rik	4	0.96146	0.9072	1	18470	0	1.4544	0.0018648	0.0078033	0.575013	275	3	1.4544
Vmn1r76	4	0.99813	0.99522	1	19498	0	1.0406	0.0018731	0.0078772	0.575013	276	4	1.0406
Ralgapa1	4	0.77012	0.70032	0.932472	15465	1	1.2114	0.0018801	0.0078772	0.575013	277	2	1.2114
Pck1	4	0.99809	0.99514	1	19497	0	1.3077	0.0019132	0.008085	0.575013	278	4	1.3077
Hnrnpab	4	0.99809	0.99514	1	19496	0	1.2278	0.0019142	0.008085	0.575013	279	4	1.2278
Ifngr1	4	0.6443	0.61593	0.890562	14183	2	-0.17491	0.0019271	0.008085	0.575013	280	1	-0.17491
Rb1	4	0.99807	0.99514	1	19495	0	1.2102	0.0019279	0.008085	0.575013	281	4	1.2102
Zfp607	3	0.99806	0.99627	1	19493	0	1.7696	0.0019433	0.0053493	0.481971	282	3	1.7696
Gm10662	4	0.99805	0.99507	1	19492	0	1.4583	0.0019535	0.0081507	0.575013	283	4	1.4583
Olfr250	4	0.99804	0.99501	1	19491	0	1.0337	0.0019626	0.0082184	0.575013	284	4	1.0337
Myef2	4	0.76487	0.69843	0.931762	15400	1	1.1664	0.0019636	0.0082184	0.575013	285	2	1.1664
Btg1-ps1	4	0.51729	0.47986	0.815299	12127	2	-0.14691	0.0019784	0.0084324	0.575013	286	1	-0.14691
Defb19	4	0.99801	0.99493	1	19490	0	1.1847	0.0019916	0.0084324	0.575013	287	4	1.1847
Wdr91	4	0.99477	0.98602	1	19380	0	1.4604	0.0020201	0.0084324	0.575013	288	4	1.4604
Hus1b	4	0.99798	0.99493	1	19489	0	1.2261	0.0020247	0.0084329	0.575013	289	4	1.2261
Srrm4	4	0.20044	0.20759	0.617435	6864	2	-0.24435	0.0020298	0.0084329	0.575013	290	1	-0.24435
Paqr7	4	0.98754	0.9688	1	19174	0	1.8817	0.0020517	0.0084329	0.575013	291	4	1.8817
Jade3	4	0.99121	0.97757	1	19277	0	1.4497	0.0020616	0.0084329	0.575013	292	4	1.4497
Actr5	4	0.99794	0.99493	1	19488	0	0.86836	0.0020628	0.0084329	0.575013	293	4	0.86836
Olfr867	4	0.99793	0.99493	1	19487	0	1.4048	0.0020703	0.0084329	0.575013	294	4	1.4048
S100a6	4	0.99792	0.99486	1	19486	0	0.97405	0.0020753	0.0085053	0.575013	295	4	0.97405
Pygl	4	0.86464	0.76957	0.960217	16532	1	0.6326	0.0020811	0.0085058	0.575013	296	2	0.6326
Prss27	4	0.99792	0.99486	1	19485	0	1.3241	0.0020828	0.0085058	0.575013	297	4	1.3241
Olfr1302	4	0.75462	0.6919	0.930153	15297	1	1.6894	0.0020836	0.0085058	0.575013	298	3	1.6894
Eif3g	4	0.98825	0.97029	1	19197	0	2.1287	0.0020883	0.008583	0.575013	299	4	2.1287
Pfkfb3	4	0.99791	0.99478	1	19484	0	1.2921	0.0020913	0.008583	0.575013	300	4	1.2921
Pnliprp1	4	0.99789	0.99478	1	19483	0	0.90358	0.0021074	0.008583	0.575013	301	4	0.90358
Kdm4b	4	0.6337	0.60342	0.885225	13971	2	0.80648	0.0021077	0.008583	0.575013	302	2	0.80648
Hivep1	4	0.99616	0.99	1	19415	0	1.4106	0.0021133	0.008583	0.575013	303	4	1.4106
Rwdd1	4	0.98689	0.96821	1	19155	0	1.2851	0.0021269	0.0085835	0.575013	304	4	1.2851
Ilvbl	4	0.1319	0.14302	0.542112	5320	3	-0.79145	0.0021325	0.0085835	0.575013	305	1	-0.79145
Slc6a14	4	0.96487	0.91386	1	18555	0	1.3373	0.002161	0.0085835	0.575013	306	3	1.3373
Olfr960	4	0.99783	0.99478	1	19482	0	0.80115	0.0021652	0.0087572	0.581023	307	4	0.80115
Adipor2	3	0.20287	0.19597	0.605616	6922	2	-0.89068	0.0021776	0.0064832	0.518478	308	1	-0.89068
Olfr1223	4	0.42428	0.40956	0.780843	10787	1	0.9336	0.0021838	0.0087577	0.581023	309	3	0.9336
Scgb2b15	4	0.9978	0.99478	1	19481	0	1.0564	0.0021953	0.0087577	0.581023	310	4	1.0564
Mxd1	4	0.99778	0.99462	1	19479	0	1.1937	0.0022204	0.0090903	0.591701	311	4	1.1937
Dgcr2	4	0.72032	0.67421	0.922837	14997	1	1.6239	0.0022323	0.0090903	0.591701	312	3	1.6239
Lmbr1l	4	0.90428	0.81544	0.97777	17187	1	0.5183	0.0022351	0.0090907	0.591701	313	3	0.5183
Rsph14	4	0.77355	0.70126	0.932472	15498	1	1.6124	0.0022373	0.0090907	0.591701	314	3	1.6124
Gucy1b2	4	0.99776	0.99462	1	19477	0	0.69026	0.0022373	0.0090907	0.591701	315	4	0.69026
R3hdm1	4	0.99776	0.99462	1	19476	0	1.2854	0.0022421	0.0090907	0.591701	316	4	1.2854
Hvcn1	4	0.82422	0.73975	0.950082	15996	1	1.4787	0.0022654	0.0092462	0.59621	317	3	1.4787
Lynx1	4	0.96631	0.91894	1	18596	0	1.4341	0.0022816	0.0092467	0.59621	318	3	1.4341
Pdzd9	4	0.97409	0.93804	1	18801	0	0.63301	0.0022865	0.0092467	0.59621	319	3	0.63301
Fut8	4	0.98919	0.97254	1	19216	0	1.7347	0.0022989	0.0093897	0.6017	320	4	1.7347
Mbd2	4	0.99696	0.99233	1	19443	0	1.2495	0.0023009	0.0093902	0.6017	321	4	1.2495
Aph1a	4	0.99769	0.99438	1	19475	0	1.0076	0.0023053	0.0094559	0.604037	322	4	1.0076
Olfr1507	4	0.99767	0.99438	1	19474	0	0.93893	0.0023302	0.0097578	0.621394	323	4	0.93893
Gsx2	4	0.98917	0.97254	1	19215	0	1.2795	0.0023368	0.0098441	0.624966	324	4	1.2795
Acbd6	4	0.99765	0.99429	1	19473	0	0.81084	0.0023466	0.0099276	0.628333	325	4	0.81084
Dedd	4	0.99765	0.99421	1	19472	0	1.2303	0.002351	0.010003	0.629241	326	4	1.2303
Siglecg	4	0.99764	0.99421	1	19471	0	0.94525	0.0023565	0.010003	0.629241	327	4	0.94525
Rab3d	4	0.99762	0.99404	1	19470	0	1.0162	0.0023753	0.01025	0.638943	328	4	1.0162
Olfr1052	4	0.99761	0.99404	1	19469	0	0.93098	0.0023875	0.01025	0.638943	329	4	0.93098
Fut4	4	0.35468	0.35789	0.742779	9882	1	0.50248	0.0023892	0.01025	0.638943	330	3	0.50248
Hat1	4	0.9976	0.99404	1	19468	0	1.1404	0.0023992	0.010322	0.639595	331	4	1.1404
Mapre1	4	0.72751	0.67608	0.922837	15059	1	1.3639	0.0024003	0.010323	0.639595	332	3	1.3639
Skint2	4	0.79165	0.71529	0.938179	15667	1	1.1563	0.0024403	0.010599	0.650887	333	3	1.1563
Muc20	4	0.49413	0.46382	0.808761	11812	2	0.02738	0.0024405	0.010599	0.650887	334	2	0.02738
Fam206a	4	0.55084	0.50991	0.832484	12604	1	1.6199	0.0024621	0.010599	0.650887	335	3	1.6199
Olfr435	4	0.4683	0.44273	0.797252	11411	1	0.56535	0.0024918	0.010855	0.654137	336	2	0.56535
Hnrnpa3	3	0.9975	0.99519	1	19467	0	1.4295	0.0024956	0.0072754	0.562224	337	3	1.4295
Ssxb9	4	0.9975	0.99385	1	19466	0	0.83849	0.0024994	0.010855	0.654137	338	4	0.83849
4930544D05Rik	4	0.59311	0.55614	0.859415	13268	1	1.5379	0.0025131	0.010855	0.654137	339	3	1.5379
Olfr539	4	0.99749	0.99385	1	19465	0	1.4278	0.0025144	0.010855	0.654137	340	4	1.4278
Mtf2	4	0.99748	0.99385	1	19464	0	1.4855	0.0025155	0.010855	0.654137	341	4	1.4855
Pbp2	4	0.91099	0.82928	0.988478	17307	1	1.7568	0.0025348	0.010941	0.654137	342	3	1.7568
2410016O06Rik	4	0.99672	0.99145	1	19437	0	1.6133	0.0025369	0.010941	0.654137	343	4	1.6133
Ermp1	4	0.92683	0.85162	0.995047	17630	1	1.1954	0.0025431	0.011017	0.654137	344	2	1.1954
Akr1c18	4	0.99743	0.99359	1	19463	0	1.2104	0.0025667	0.011101	0.654137	345	4	1.2104
Vasp	4	0.99742	0.99359	1	19462	0	1.3583	0.0025761	0.011102	0.654137	346	4	1.3583
Smpd4	4	0.99742	0.9935	1	19461	0	0.68481	0.0025832	0.011181	0.654137	347	4	0.68481
Olfr1162	4	0.99742	0.9935	1	19460	0	1.3313	0.0025844	0.011181	0.654137	348	4	1.3313
Kif1c	4	0.09812	0.11326	0.505687	4548	1	0.41806	0.0025945	0.011278	0.654137	349	3	0.41806
Tmem234	4	0.71889	0.67238	0.922837	14984	1	1.6878	0.002606	0.011279	0.654137	350	3	1.6878
1700066B19Rik	4	0.99739	0.99332	1	19459	0	1.0123	0.0026146	0.011357	0.654137	351	4	1.0123
Rspry1	4	0.95148	0.89206	1	18194	0	1.4053	0.0026149	0.011357	0.654137	352	3	1.4053
Ttc9	4	0.99737	0.99332	1	19458	0	0.97741	0.0026271	0.011357	0.654137	353	4	0.97741
Wdsub1	4	0.4017	0.39044	0.766214	10491	2	-0.27767	0.0026458	0.011444	0.654137	354	2	-0.27767
Snx22	4	0.99734	0.99322	1	19457	0	0.84888	0.0026558	0.011444	0.654137	355	4	0.84888
Acy3	4	0.99734	0.99322	1	19456	0	1.2073	0.0026582	0.011444	0.654137	356	4	1.2073
Cwc27	4	0.99734	0.99322	1	19455	0	1.1421	0.0026588	0.011444	0.654137	357	4	1.1421
Cyp2d26	4	0.99473	0.98602	1	19379	0	1.4165	0.0026741	0.011445	0.654137	358	4	1.4165
Zdhhc2	4	0.99732	0.99322	1	19453	0	0.9268	0.00268	0.011445	0.654137	359	4	0.9268
Tnfrsf21	4	0.66452	0.64035	0.905393	14542	1	1.3696	0.0026842	0.011445	0.654137	360	3	1.3696
Ddit3	4	0.99424	0.98504	1	19365	0	1.6797	0.0026853	0.011445	0.654137	361	4	1.6797
Car5b	4	0.99729	0.99322	1	19452	0	1.0271	0.0027128	0.011621	0.662341	362	4	1.0271
Maz	4	0.8003	0.71996	0.940776	15746	1	1.7304	0.0027239	0.01179	0.670144	363	3	1.7304
Furin	4	0.99726	0.99303	1	19451	0	0.62634	0.0027368	0.011881	0.673471	364	4	0.62634
Zfp768	4	0.99723	0.99294	1	19450	0	0.91429	0.0027714	0.011973	0.674958	365	4	0.91429
Cdk2ap2	4	0.99722	0.99294	1	19449	0	1.1022	0.0027807	0.011973	0.674958	366	4	1.1022
Nit2	4	0.29629	0.31707	0.713202	9057	2	-0.43718	0.0027998	0.012064	0.677964	367	2	-0.43718
Myo9b	4	0.98035	0.95498	1	18988	0	1.9092	0.0028217	0.012157	0.677964	368	3	1.9092
Snrpn	4	0.99511	0.98635	1	19392	0	1.5397	0.0028428	0.012158	0.677964	369	4	1.5397
Reps1	4	0.14248	0.14739	0.542112	5543	3	-0.82874	0.0028511	0.012244	0.679136	370	1	-0.82874
Asb7	4	0.72985	0.67608	0.922837	15079	1	1.4404	0.0028745	0.012244	0.679136	371	3	1.4404
Pgm2l1	4	0.9759	0.94469	1	18849	0	1.2713	0.0029005	0.012344	0.682837	372	3	1.2713
Spata31d1d	4	0.96621	0.91894	1	18595	0	1.5289	0.0029187	0.012528	0.689281	373	3	1.5289
2310036O22Rik	4	0.59444	0.55614	0.859415	13296	1	2.246	0.0029219	0.012528	0.689281	374	3	2.246
Wdr53	4	0.99706	0.99254	1	19447	0	1.1984	0.0029358	0.0128	0.691117	375	4	1.1984
Zfp647	4	0.2153	0.2258	0.640412	7210	1	1.7687	0.0029518	0.0128	0.691117	376	3	1.7687
Ccdc74a	4	0.92737	0.85162	0.995047	17643	1	1.6402	0.0029638	0.012801	0.691117	377	3	1.6402
Fam216b	4	0.70634	0.66578	0.919111	14889	1	1.3181	0.0029662	0.012801	0.691117	378	3	1.3181
Adamts15	4	0.47283	0.44612	0.797252	11482	2	0.86917	0.0029751	0.012801	0.691117	379	2	0.86917
Phpt1	4	0.67529	0.64529	0.90561	14647	1	1.3533	0.0029758	0.012801	0.691117	380	3	1.3533
Styx	4	0.88418	0.79011	0.968698	16821	1	1.7319	0.0029976	0.012906	0.691117	381	3	1.7319
Olfr19	4	0.997	0.99243	1	19446	0	0.84699	0.0029979	0.012906	0.691117	382	4	0.84699
Mesdc1	4	0.65434	0.62812	0.897495	14364	1	1.0694	0.003005	0.012996	0.691117	383	3	1.0694
Cyp2c50	4	0.11939	0.13359	0.537332	5047	2	0.83097	0.0030085	0.012996	0.691117	384	2	0.83097
Med26	4	0.67247	0.64529	0.90561	14618	1	1.5092	0.0030118	0.012996	0.691117	385	3	1.5092
Lipm	4	0.29691	0.31707	0.713202	9069	2	0.63197	0.0030152	0.012996	0.691117	386	2	0.63197
Dfnb59	4	0.99697	0.99243	1	19444	0	1.0685	0.0030257	0.012996	0.691117	387	4	1.0685
Lpar3	4	0.95501	0.89657	1	18281	0	1.7526	0.0030488	0.0131	0.691284	388	3	1.7526
Kcnj6	4	0.36077	0.36348	0.745813	9970	1	0.27669	0.0030563	0.0131	0.691284	389	3	0.27669
Zfp426	4	0.37742	0.37614	0.756507	10195	2	0.30501	0.0030691	0.0131	0.691284	390	2	0.30501
Prkar1a	4	0.99692	0.99221	1	19442	0	0.79148	0.0030757	0.013301	0.698347	391	4	0.79148
Tns4	4	0.28904	0.30968	0.707715	8941	1	1.418	0.003093	0.013302	0.698347	392	3	1.418
Dnajc5b	4	0.29151	0.31328	0.711658	8997	3	-0.53557	0.0031076	0.0135	0.706953	393	1	-0.53557
2310047M10Rik	4	0.99688	0.99221	1	19441	0	0.92922	0.0031169	0.013588	0.708008	394	4	0.92922
Olfr1155	4	0.99688	0.99221	1	19440	0	1.0781	0.0031189	0.013588	0.708008	395	4	1.0781
Yrdc	4	0.059766	0.060401	0.339393	3638	3	-3.722	0.0031589	0.013871	0.719007	396	1	-3.722
Myoz2	4	0.1086	0.12719	0.536251	4811	2	0.29468	0.0031955	0.013973	0.719007	397	2	0.29468
Greb1	4	0.73776	0.68165	0.925816	15155	1	0.25614	0.0032102	0.013974	0.719007	398	2	0.25614
Adk	4	0.99678	0.992	1	19439	0	1.1649	0.0032192	0.013974	0.719007	399	4	1.1649
l7Rn6	4	0.64327	0.61593	0.890562	14162	1	1.1545	0.0032272	0.014219	0.729779	400	3	1.1545
Tnp1	4	0.12131	0.13394	0.537332	5081	2	0.62466	0.0032405	0.014317	0.733005	401	2	0.62466
Gpc6	4	0.053407	0.054833	0.323508	3430	1	1.6277	0.0032474	0.014422	0.736533	402	3	1.6277
Lta4h	4	0.99674	0.99145	1	19438	0	1.1349	0.0032597	0.014827	0.73942	403	4	1.1349
Med31	4	0.33333	0.34377	0.730627	9579	2	0.017808	0.0032615	0.014827	0.73942	404	2	0.017808
G2e3	4	0.97784	0.94957	1	18912	0	1.2515	0.0032648	0.014827	0.73942	405	2	1.2515
Cst11	4	0.36418	0.36421	0.745813	10020	1	0.78296	0.0032683	0.014827	0.73942	406	2	0.78296
Rfpl3s	4	0.99672	0.99145	1	19436	0	0.87927	0.0032794	0.014827	0.73942	407	4	0.87927
Lman2l	4	0.13725	0.14658	0.542112	5413	1	0.93737	0.0032823	0.014827	0.73942	408	2	0.93737
Aim1l	4	0.99671	0.99145	1	19435	0	0.72238	0.0032865	0.014827	0.73942	409	4	0.72238
Isg15	4	0.081298	0.083678	0.414734	4135	1	1.0424	0.0032998	0.014827	0.73942	410	2	1.0424
Amz1	4	0.87032	0.77428	0.962277	16608	1	1.4216	0.0033338	0.014919	0.73942	411	3	1.4216
Spaca3	4	0.98456	0.96275	1	19089	0	1.4643	0.0033403	0.014919	0.73942	412	3	1.4643
Gm13889	4	0.14345	0.14779	0.542112	5563	3	-0.5572	0.0033641	0.014919	0.73942	413	1	-0.5572
Ak5	4	0.99661	0.99135	1	19434	0	0.84942	0.0033907	0.015016	0.73942	414	4	0.84942
Gng4	4	0.99661	0.99135	1	19433	0	0.86686	0.0033922	0.015016	0.73942	415	4	0.86686
Adgrd1	4	0.99661	0.99135	1	19432	0	0.8894	0.0033929	0.015016	0.73942	416	4	0.8894
Nmt1	4	0.99661	0.99135	1	19431	0	1.2261	0.0033936	0.015016	0.73942	417	4	1.2261
Numbl	4	0.99659	0.99111	1	19430	0	0.86196	0.0034081	0.015241	0.744752	418	4	0.86196
Cfap53	4	0.22749	0.23685	0.648021	7476	2	0.16686	0.0034154	0.01534	0.744752	419	2	0.16686
Hoxc6	4	0.51669	0.47894	0.814344	12122	2	0.89041	0.0034163	0.01534	0.744752	420	2	0.89041
Toporsl	4	0.99658	0.99101	1	19429	0	0.87252	0.003419	0.01534	0.744752	421	4	0.87252
Hprt	4	0.73177	0.67795	0.924464	15099	1	1.4305	0.00344	0.015561	0.751954	422	3	1.4305
Sec22c	4	0.48146	0.45399	0.803431	11626	2	-0.2891	0.0034667	0.015562	0.751954	423	2	-0.2891
Dmc1	4	0.99652	0.99077	1	19428	0	0.91089	0.0034805	0.015665	0.753433	424	4	0.91089
Ssbp4	4	0.99651	0.99064	1	19427	0	0.99533	0.0034893	0.01579	0.754183	425	4	0.99533
Pqlc1	4	0.9965	0.99064	1	19426	0	1.0084	0.0034967	0.015791	0.754183	426	4	1.0084
Mtap7d3	4	0.93672	0.87079	1	17881	0	1.69	0.0034988	0.015791	0.754183	427	3	1.69
Endou	4	0.45273	0.43029	0.790892	11177	1	1.0073	0.0035168	0.016123	0.755352	428	2	1.0073
Dscr3	4	0.067209	0.067902	0.362303	3806	3	-1.3083	0.003518	0.016123	0.755352	429	1	-1.3083
Myl10	4	0.99646	0.99064	1	19425	0	0.97855	0.0035368	0.016123	0.755352	430	4	0.97855
Slc51b	4	0.99646	0.99052	1	19424	0	0.80416	0.0035391	0.016242	0.755352	431	4	0.80416
Ergic2	4	0.96408	0.91321	1	18532	0	1.1719	0.0035458	0.016242	0.755352	432	2	1.1719
4931429I11Rik	4	0.99644	0.99052	1	19423	0	1.2511	0.0035615	0.016242	0.755352	433	4	1.2511
Dse	4	0.61508	0.58458	0.878958	13657	2	-0.11924	0.0035693	0.016242	0.755352	434	1	-0.11924
Pja1	4	0.99642	0.9904	1	19422	0	1.1223	0.0035833	0.016355	0.755352	435	4	1.1223
Npas1	4	0.042578	0.042123	0.28552	3016	2	0.66321	0.0035894	0.016355	0.755352	436	2	0.66321
Naca	4	0.99639	0.9904	1	19421	0	1.5192	0.0036075	0.016355	0.755352	437	4	1.5192
Olfr1048	4	0.39336	0.3872	0.761586	10390	1	1.784	0.0036095	0.016355	0.755352	438	3	1.784
Tlcd1	4	0.26345	0.27771	0.679865	8331	2	-0.58203	0.0036206	0.016473	0.755352	439	1	-0.58203
Sftpd	4	0.99636	0.99014	1	19420	0	0.89785	0.0036394	0.016597	0.755352	440	4	0.89785
Zmym4	4	0.99636	0.99014	1	19419	0	1.6325	0.0036424	0.016597	0.755352	441	4	1.6325
Nfe2l1	4	0.9772	0.94872	1	18888	0	1.5572	0.0036664	0.016597	0.755352	442	3	1.5572
Cfap69	4	0.99628	0.99014	1	19418	0	1.3016	0.00372	0.016693	0.755352	443	4	1.3016
2-Mar	4	0.96554	0.91771	1	18577	0	0.98818	0.0037232	0.016693	0.755352	444	3	0.98818
Olfr366	4	0.75783	0.6919	0.930153	15327	1	1.1513	0.0037256	0.016693	0.755352	445	3	1.1513
Akap12	4	0.3573	0.35863	0.742779	9918	1	1.3979	0.0037297	0.016693	0.755352	446	3	1.3979
Ybx1	4	0.49953	0.46798	0.811107	11892	1	1.4155	0.0037661	0.016694	0.755352	447	3	1.4155
Gm9047	4	0.19389	0.19857	0.605616	6709	2	0.20763	0.0037703	0.016694	0.755352	448	2	0.20763
Rock2	4	0.45686	0.43199	0.790892	11249	2	-0.24696	0.0037744	0.016694	0.755352	449	1	-0.24696
Hoxa13	4	0.95446	0.89582	1	18266	0	1.5414	0.0037928	0.017024	0.763635	450	3	1.5414
Cep350	4	0.91518	0.83395	0.989306	17389	1	1.7671	0.0038003	0.017024	0.763635	451	3	1.7671
1700055N04Rik	4	0.93212	0.86366	1	17770	0	0.97898	0.0038257	0.017025	0.763635	452	3	0.97898
C87436	4	0.99617	0.99	1	19416	0	1.0562	0.0038273	0.017025	0.763635	453	4	1.0562
Zfp385c	4	0.98631	0.96701	1	19133	0	1.3611	0.0038623	0.017476	0.780496	454	4	1.3611
Cpeb2	4	0.99613	0.98987	1	19413	0	1.1767	0.0038734	0.017476	0.780496	455	4	1.1767
Mex3d	4	0.92914	0.85542	0.997958	17690	1	-0.018338	0.003877	0.017585	0.781976	456	1	-0.018338
Rab40b	4	0.99607	0.98987	1	19412	0	1.6524	0.0039288	0.017585	0.781976	457	4	1.6524
Susd5	4	0.47641	0.44698	0.797252	11546	2	0.08945	0.0039795	0.017949	0.796455	458	2	0.08945
Clpx	3	0.018961	0.012812	0.15596	1904	2	-6.0183	0.0039866	0.012146	0.677964	459	1	-6.0183
Adgrf1	4	0.66664	0.64439	0.90561	14579	1	1.6472	0.004001	0.018078	0.800419	460	3	1.6472
Esyt3	4	0.98222	0.95848	1	19031	0	1.3936	0.0040039	0.018187	0.801654	461	3	1.3936
Fbn1	4	0.98477	0.96377	1	19096	0	1.1782	0.0040244	0.0183	0.801654	462	3	1.1782
Ifih1	4	0.99597	0.9896	1	19411	0	0.83838	0.0040306	0.0183	0.801654	463	4	0.83838
Ankle1	4	0.066393	0.067902	0.362303	3787	2	0.48089	0.0040308	0.0183	0.801654	464	2	0.48089
Scyl1	4	0.99592	0.9896	1	19410	0	1.4305	0.0040786	0.018528	0.809941	465	4	1.4305
Ttc26	4	0.9959	0.98945	1	19409	0	0.87897	0.0040952	0.018788	0.816123	466	4	0.87897
Mansc1	4	0.61994	0.58888	0.881311	13740	2	-0.43358	0.0041334	0.019143	0.82978	467	1	-0.43358
Trappc10	4	0.99583	0.98892	1	19408	0	0.67099	0.0041706	0.019998	0.857877	468	4	0.67099
Nckap1l	4	0.99582	0.98892	1	19407	0	1.5167	0.0041833	0.019998	0.857877	469	4	1.5167
Pcdha6	4	0.91714	0.83671	0.990863	17426	1	-0.039216	0.0041846	0.019998	0.857877	470	1	-0.039216
Stk33	4	0.9958	0.98892	1	19406	0	1.0876	0.004196	0.019999	0.857877	471	4	1.0876
Scaf1	4	0.99527	0.98731	1	19396	0	1.221	0.0042197	0.020241	0.861131	472	4	1.221
Cldn5	4	0.99577	0.98892	1	19405	0	0.80362	0.0042266	0.020241	0.861131	473	4	0.80362
Pax1	4	0.47567	0.44698	0.797252	11534	2	-0.4391	0.0042359	0.020241	0.861131	474	1	-0.4391
Serping1	4	0.56231	0.52399	0.844059	12770	2	0.76974	0.0042513	0.020242	0.861131	475	2	0.76974
Eml4	4	0.21675	0.22697	0.640412	7238	2	0.1409	0.0042711	0.020497	0.86841	476	2	0.1409
Mthfsd	4	0.99571	0.98879	1	19404	0	1.0382	0.0042918	0.020497	0.86841	477	4	1.0382
Ano2	4	0.96862	0.92075	1	18657	0	1.1164	0.0043322	0.020896	0.879925	478	3	1.1164
Pde10a	4	0.89145	0.80135	0.975383	16956	1	1.194	0.0043338	0.020897	0.879925	479	3	1.194
Slc9a7	4	0.19705	0.20072	0.607521	6780	2	-0.9599	0.0043384	0.020897	0.879925	480	1	-0.9599
Tmem101	4	0.99565	0.98836	1	19403	0	1.0267	0.0043498	0.021021	0.881478	481	4	1.0267
Cysltr2	4	0.99563	0.98822	1	19402	0	0.91017	0.0043682	0.021147	0.881478	482	4	0.91017
Hist1h4a	3	0.89543	0.80961	0.976817	17010	0	1.8891	0.0043781	0.013684	0.711163	483	2	1.8891
Ankrd54	4	0.64148	0.61291	0.890562	14122	1	0.65485	0.0043897	0.021147	0.881478	484	3	0.65485
Ugt8a	4	0.99561	0.98822	1	19401	0	0.70185	0.0043909	0.021147	0.881478	485	4	0.70185
Slc25a16	4	0.25537	0.27063	0.679237	8150	1	1.3339	0.004407	0.021147	0.881478	486	3	1.3339
Tex43	4	0.94837	0.88589	1	18133	0	0.16228	0.0044922	0.021798	0.895971	487	2	0.16228
Asb4	4	0.8385	0.74534	0.9507	16173	1	1.4708	0.0045004	0.021798	0.895971	488	3	1.4708
Tex26	4	0.37243	0.37124	0.753168	10131	2	0.59552	0.0045123	0.021798	0.895971	489	2	0.59552
Gabarapl1	4	0.33494	0.34444	0.730627	9609	2	0.67431	0.0045245	0.021799	0.895971	490	2	0.67431
Tmem18	3	0.99542	0.98999	1	19399	0	1.3891	0.0045835	0.015128	0.743175	491	3	1.3891
Baz2b	4	0.66293	0.63823	0.90389	14520	1	0.91735	0.0046394	0.022079	0.902117	492	2	0.91735
Psmd8	3	0.34139	0.31595	0.713202	9691	1	1.5363	0.0046404	0.015632	0.753433	493	2	1.5363
AI987944	4	0.65907	0.63112	0.899307	14443	1	0.65753	0.0046459	0.02208	0.902117	494	3	0.65753
Slc41a1	4	0.99535	0.98761	1	19398	0	0.83358	0.0046536	0.02208	0.902117	495	4	0.83358
Arhgap33	4	0.99527	0.98731	1	19397	0	1.15	0.0047255	0.022366	0.910198	496	4	1.15
Nr1h3	4	0.99151	0.9785	1	19283	0	1.0715	0.0047294	0.022366	0.910198	497	4	1.0715
Xpo7	4	0.5634	0.52592	0.845594	12796	1	1.3332	0.0047898	0.022959	0.92391	498	3	1.3332
Adig	4	0.50645	0.47211	0.812628	11979	1	0.94553	0.0048228	0.022959	0.92391	499	2	0.94553
Ifnl3	4	0.89703	0.80786	0.976817	17051	1	1.6543	0.0048276	0.022959	0.92391	500	3	1.6543
Nrap	4	0.99516	0.98681	1	19395	0	1.4366	0.0048359	0.022959	0.92391	501	4	1.4366
Vsx1	4	0.58559	0.54845	0.857416	13141	1	1.7019	0.004848	0.023105	0.92391	502	3	1.7019
Cox11	4	0.16326	0.17329	0.589041	6014	2	-2.5509	0.0048509	0.023105	0.92391	503	1	-2.5509
Cpxm1	4	0.14382	0.15088	0.551389	5573	1	1.1688	0.0048557	0.023106	0.92391	504	3	1.1688
Hint1	4	0.99241	0.98048	1	19310	0	1.7232	0.0048574	0.023106	0.92391	505	4	1.7232
Cyp51	4	0.99514	0.98665	1	19394	0	1.0371	0.0048576	0.023106	0.92391	506	4	1.0371
Tcf12	4	0.95408	0.89582	1	18253	0	1.1604	0.0048623	0.02324	0.927504	507	3	1.1604
Arf6	4	0.94382	0.88015	1	18030	0	1.6416	0.0048691	0.023385	0.931467	508	3	1.6416
Tuba3a	4	0.38751	0.38238	0.761586	10316	1	1.257	0.0048739	0.023649	0.933722	509	3	1.257
Gm960	4	0.99511	0.98635	1	19393	0	1.0682	0.0048879	0.023649	0.933722	510	4	1.0682
Fcrl6	4	0.014144	0.012728	0.15577	1658	1	1.1964	0.0049021	0.023649	0.933722	511	3	1.1964
Cd40	4	0.99505	0.98635	1	19391	0	0.73991	0.0049539	0.023922	0.933722	512	4	0.73991
Cbr3	4	0.80517	0.72275	0.94329	15792	1	1.2256	0.004954	0.023922	0.933722	513	3	1.2256
Actr2	4	0.10037	0.11491	0.505769	4608	2	-1.4339	0.0049668	0.024053	0.933722	514	2	-1.4339
Clec4a1	4	0.84053	0.74814	0.952747	16201	1	1.2376	0.0049741	0.024053	0.933722	515	3	1.2376
Tex19.1	4	0.99502	0.98635	1	19389	0	0.87981	0.004975	0.024053	0.933722	516	4	0.87981
Erbb4	4	0.995	0.98619	1	19387	0	1.0769	0.0050001	0.02433	0.933722	517	4	1.0769
Pgm1	4	0.995	0.98619	1	19386	0	0.73243	0.005004	0.02433	0.933722	518	4	0.73243
Mina	4	0.020691	0.017144	0.173595	1995	2	-0.16494	0.0050046	0.02433	0.933722	519	2	-0.16494
Wbscr28	4	0.89837	0.80975	0.976817	17080	1	1.3443	0.0050052	0.02433	0.933722	520	3	1.3443
Cyp26a1	4	0.97258	0.93225	1	18763	0	1.2099	0.0050214	0.02433	0.933722	521	3	1.2099
Col4a3bp	3	0.96608	0.93158	1	18589	0	1.6689	0.0050255	0.016506	0.755352	522	3	1.6689
Car7	4	0.99497	0.98619	1	19385	0	0.97605	0.0050263	0.02433	0.933722	523	4	0.97605
Il17a	4	0.89583	0.80602	0.976376	17021	1	1.0873	0.0050536	0.024482	0.933722	524	3	1.0873
Dcaf12	4	0.46322	0.4358	0.792855	11335	2	0.37187	0.0050558	0.024482	0.933722	525	2	0.37187
Arpc4	4	0.43491	0.41916	0.790542	10925	1	2.1946	0.0050826	0.024482	0.933722	526	3	2.1946
Cd302	4	0.73608	0.68165	0.925816	15138	1	1.605	0.0050842	0.024482	0.933722	527	3	1.605
Tmem194b	4	0.3686	0.36977	0.750999	10074	1	1.3162	0.0050859	0.024482	0.933722	528	3	1.3162
Ddc	4	0.99491	0.98602	1	19384	0	0.72684	0.0050877	0.024482	0.933722	529	4	0.72684
Prdx6b	4	0.88508	0.79198	0.968698	16840	1	1.1238	0.005091	0.024482	0.933722	530	3	1.1238
Shoc2	4	0.92264	0.846	0.993541	17543	1	1.4089	0.0050912	0.024482	0.933722	531	3	1.4089
Ep400	4	0.93004	0.85819	0.99966	17716	1	0.12931	0.0051071	0.024482	0.933722	532	2	0.12931
Usp54	3	0.96841	0.93836	1	18650	0	1.3965	0.0051242	0.016507	0.755352	533	3	1.3965
Hhla1	4	0.99197	0.97963	1	19295	0	1.1371	0.0051578	0.025056	0.939973	534	4	1.1371
Tmem225	4	0.16869	0.18044	0.598876	6113	2	-0.23845	0.0051583	0.025056	0.939973	535	2	-0.23845
Cyfip2	4	0.4558	0.43199	0.790892	11230	1	1.5777	0.0051768	0.025056	0.939973	536	3	1.5777
Olfr555	4	0.17463	0.18438	0.598876	6257	1	1.0923	0.005182	0.025056	0.939973	537	3	1.0923
Zyg11a	4	0.99481	0.98602	1	19383	0	0.97693	0.0051884	0.025056	0.939973	538	4	0.97693
Spin1	4	0.9948	0.98602	1	19382	0	1.0003	0.0052033	0.025056	0.939973	539	4	1.0003
Tma7	4	0.99477	0.98602	1	19381	0	1.3686	0.0052283	0.025056	0.939973	540	4	1.3686
Armcx1	4	0.88425	0.79011	0.968698	16822	1	1.3627	0.0052408	0.025056	0.939973	541	3	1.3627
Acr	4	0.042478	0.042123	0.28552	3014	2	-0.45644	0.0052565	0.025056	0.939973	542	2	-0.45644
Xlr5b	4	0.26728	0.28106	0.681839	8430	3	-0.65225	0.0052607	0.025204	0.94211	543	1	-0.65225
Derl1	4	0.99434	0.98504	1	19370	0	1.4251	0.0052967	0.025205	0.94211	544	4	1.4251
Zfp668	4	0.95514	0.89657	1	18287	0	1.1775	0.0053048	0.025491	0.949378	545	3	1.1775
Chrna7	4	0.48797	0.45749	0.803978	11731	1	1.2242	0.005323	0.025491	0.949378	546	3	1.2242
Lyrm5	4	0.37681	0.37614	0.756507	10184	2	-0.42185	0.0053632	0.025798	0.959085	547	1	-0.42185
Sbk3	4	0.59933	0.56244	0.861731	13378	1	1.0661	0.0053864	0.026086	0.96461	548	3	1.0661
5430427O19Rik	4	0.9946	0.98553	1	19377	0	1.2254	0.0054034	0.026086	0.96461	549	4	1.2254
Zfp541	4	0.99459	0.98553	1	19376	0	1.0653	0.0054085	0.026087	0.96461	550	4	1.0653
Olfr1383	4	0.87942	0.78457	0.966279	16752	1	1.4448	0.0054332	0.026243	0.966947	551	3	1.4448
Meikin	4	0.29894	0.31772	0.713264	9095	1	1.2071	0.0054466	0.026244	0.966947	552	3	1.2071
Ubr1	4	0.99259	0.9807	1	19315	0	1.3516	0.0054611	0.026543	0.975649	553	4	1.3516
Wt1	4	0.71887	0.67238	0.922837	14983	1	1.4628	0.0054754	0.026811	0.975649	554	3	1.4628
Hsd17b6	4	0.95502	0.89657	1	18282	0	1.169	0.0054789	0.026811	0.975649	555	3	1.169
Rnf215	4	0.94366	0.88015	1	18026	0	0.98908	0.0055168	0.026811	0.975649	556	3	0.98908
Sap30	4	0.99447	0.9852	1	19374	0	0.88849	0.0055316	0.026811	0.975649	557	4	0.88849
Kmt2d	4	0.94007	0.87253	1	17961	0	1.6573	0.0055406	0.026811	0.975649	558	3	1.6573
Pou2af1	4	0.83872	0.74627	0.951013	16177	1	1.1909	0.0055652	0.026811	0.975649	559	3	1.1909
Acat2	4	0.39421	0.3872	0.761586	10401	2	0.1732	0.005568	0.026957	0.977527	560	2	0.1732
Sh3yl1	4	0.99442	0.9852	1	19373	0	0.61015	0.0055776	0.026957	0.977527	561	4	0.61015
Gm10354	3	0.53128	0.48649	0.822629	12318	1	0.75351	0.0056013	0.018271	0.801654	562	2	0.75351
Cacna2d4	4	0.99436	0.98504	1	19372	0	0.64541	0.0056367	0.02727	0.983324	563	4	0.64541
Elavl2	4	0.99436	0.98504	1	19371	0	0.60529	0.0056441	0.027271	0.983324	564	4	0.60529
Phospho1	4	0.99433	0.98504	1	19369	0	0.63232	0.0056674	0.027546	0.983324	565	4	0.63232
Nptxr	4	0.86727	0.7724	0.961702	16573	1	0.94628	0.0056705	0.027546	0.983324	566	3	0.94628
Il10ra	4	0.99433	0.98504	1	19368	0	1.2025	0.0056706	0.027546	0.983324	567	4	1.2025
Efhc2	4	0.95735	0.89949	1	18341	0	1.2136	0.0056945	0.027546	0.983324	568	3	1.2136
Trpc4	4	0.99429	0.98504	1	19367	0	0.80594	0.0057057	0.027546	0.983324	569	4	0.80594
Ctsl	4	0.99425	0.98504	1	19366	0	0.77999	0.0057496	0.027546	0.983324	570	4	0.77999
Txndc11	4	0.99424	0.98504	1	19364	0	1.0748	0.0057625	0.027546	0.983324	571	4	1.0748
Gmds	4	0.99419	0.98504	1	19363	0	0.98243	0.0058089	0.028024	0.988491	572	4	0.98243
Slc2a4	4	0.87718	0.78361	0.965781	16717	1	1.6085	0.0058108	0.028024	0.988491	573	3	1.6085
Zfp105	4	0.22235	0.23329	0.648021	7372	1	0.17904	0.0058241	0.028025	0.988491	574	2	0.17904
Kmt2b	4	0.9213	0.84509	0.993541	17515	1	1.204	0.0058364	0.028025	0.988491	575	2	1.204
Zfp787	4	0.99416	0.98504	1	19362	0	1.1204	0.0058404	0.028025	0.988491	576	4	1.1204
Ntng1	4	0.71214	0.6686	0.921034	14933	1	0.97383	0.005841	0.028025	0.988491	577	2	0.97383
Cyp2a5	4	0.59261	0.55614	0.859415	13258	1	1.4523	0.0058574	0.02817	0.988491	578	3	1.4523
Dbp	4	0.96227	0.9099	1	18492	0	1.3923	0.0058667	0.02817	0.988491	579	3	1.3923
Sytl5	4	0.98432	0.96241	1	19085	0	1.0495	0.0058686	0.02817	0.988491	580	3	1.0495
Tnni2	3	0.6074	0.53636	0.850988	13522	1	1.7131	0.0058703	0.018756	0.816123	581	2	1.7131
Ctsb	4	0.99413	0.98487	1	19361	0	0.68799	0.0058719	0.02817	0.988491	582	4	0.68799
Slc5a4a	4	0.9941	0.98471	1	19360	0	0.78469	0.0059025	0.028326	0.990628	583	4	0.78469
Lgals1	3	0.51533	0.47849	0.814344	12102	1	0.50878	0.0059087	0.018756	0.816123	584	2	0.50878
Mef2b	4	0.5411	0.50133	0.827443	12466	2	0.91488	0.0059196	0.028327	0.990628	585	2	0.91488
Ankrd45	4	0.99407	0.98471	1	19359	0	0.9491	0.00593	0.0285	0.993808	586	4	0.9491
Kdelr2	4	0.57467	0.53671	0.850988	12968	1	1.1137	0.0059418	0.028673	0.993808	587	3	1.1137
Insig1	4	0.95871	0.90095	1	18384	0	1.086	0.0059569	0.028673	0.993808	588	3	1.086
Gtpbp2	4	0.62047	0.58988	0.881311	13747	1	0.99147	0.0059754	0.028673	0.993808	589	2	0.99147
Cysltr1	4	0.99402	0.98452	1	19358	0	0.81255	0.0059762	0.028673	0.993808	590	4	0.81255
Olfr69	4	0.9841	0.96241	1	19078	0	1.4755	0.0060023	0.028827	0.993808	591	3	1.4755
Nrip3	4	0.994	0.98435	1	19357	0	0.55312	0.0060039	0.028827	0.993808	592	4	0.55312
Tepp	4	0.99076	0.97689	1	19261	0	1.0625	0.0060137	0.02914	0.993808	593	4	1.0625
Zfand1	4	0.96997	0.92429	1	18691	0	1.4987	0.0060289	0.02914	0.993808	594	3	1.4987
Olfr1090	4	0.99392	0.98418	1	19355	0	0.5826	0.0060786	0.029579	0.993808	595	4	0.5826
Gzmf	4	0.73892	0.68255	0.925816	15167	1	1.3985	0.00608	0.029579	0.993808	596	3	1.3985
Gjb4	4	0.9939	0.98418	1	19353	0	0.99996	0.0060999	0.029579	0.993808	597	4	0.99996
4921507P07Rik	4	0.99387	0.98418	1	19352	0	1.0651	0.0061257	0.029731	0.993808	598	4	1.0651
Hyal4	4	0.99385	0.98399	1	19351	0	1.0808	0.0061517	0.029901	0.993808	599	4	1.0808
Zbtb4	4	0.99384	0.98399	1	19350	0	1.1603	0.0061573	0.029901	0.993808	600	4	1.1603
Pygm	4	0.99384	0.98399	1	19349	0	0.41455	0.0061596	0.029901	0.993808	601	4	0.41455
Defb46	4	0.99381	0.98399	1	19348	0	0.78342	0.0061925	0.029902	0.993808	602	4	0.78342
Sema4b	4	0.9938	0.98399	1	19347	0	0.91365	0.006205	0.029902	0.993808	603	4	0.91365
Clrn1	4	0.58305	0.54845	0.857416	13098	2	0.62172	0.0062343	0.029902	0.993808	604	2	0.62172
Pth	4	0.48685	0.45664	0.803431	11713	2	0.3106	0.0062438	0.03006	0.993808	605	2	0.3106
Zfp58	4	0.21708	0.22697	0.640412	7247	2	-0.8266	0.0062848	0.03006	0.993808	606	2	-0.8266
Vmn1r7	4	0.11403	0.13046	0.536428	4933	2	0.36056	0.0062867	0.03006	0.993808	607	2	0.36056
Ppfibp1	4	0.14391	0.15088	0.551389	5576	1	1.3483	0.0063167	0.03006	0.993808	608	3	1.3483
Dgke	3	0.17015	0.17042	0.583375	6152	2	-1.0211	0.0063312	0.019362	0.837505	609	1	-1.0211
Zak	4	0.99367	0.98399	1	19346	0	0.57943	0.0063344	0.03006	0.993808	610	4	0.57943
Ifi44	4	0.95636	0.89806	1	18315	0	1.2565	0.006336	0.03006	0.993808	611	2	1.2565
Cd209a	4	0.99364	0.98399	1	19345	0	0.85832	0.0063564	0.03006	0.993808	612	4	0.85832
Cnksr1	4	0.58183	0.54641	0.857416	13078	1	1.4983	0.0063756	0.030209	0.993808	613	3	1.4983
Siglecf	4	0.68617	0.65	0.908886	14716	1	0.96796	0.0063835	0.030209	0.993808	614	3	0.96796
Pcdh10	4	0.99359	0.98399	1	19343	0	0.51608	0.0064075	0.030209	0.993808	615	4	0.51608
Slc28a3	4	0.96919	0.92255	1	18670	0	1.6165	0.006429	0.030209	0.993808	616	3	1.6165
Slc25a48	4	0.99356	0.98399	1	19342	0	0.99838	0.0064402	0.030387	0.993808	617	4	0.99838
Cybrd1	4	0.92612	0.85071	0.995047	17615	1	1.2848	0.0064807	0.030387	0.993808	618	3	1.2848
Gm684	4	0.99351	0.98399	1	19341	0	0.72873	0.0064859	0.030387	0.993808	619	4	0.72873
Pde2a	4	0.89902	0.80975	0.976817	17092	1	0.62946	0.0064895	0.030387	0.993808	620	2	0.62946
Grm4	4	0.99351	0.98399	1	19340	0	1.3545	0.0064918	0.030387	0.993808	621	4	1.3545
2810021J22Rik	4	0.61472	0.58458	0.878958	13652	2	0.95613	0.0064985	0.030387	0.993808	622	2	0.95613
Tom1l2	4	0.86765	0.77335	0.961702	16578	1	1.1674	0.0065067	0.030387	0.993808	623	3	1.1674
Gm15114	4	0.9735	0.936	1	18782	0	2.0471	0.0065367	0.030537	0.993808	624	3	2.0471
Zfp839	4	0.99342	0.98399	1	19339	0	1.0444	0.006578	0.030537	0.993808	625	4	1.0444
Gstt2	4	0.70151	0.66029	0.914907	14850	1	1.0332	0.0066131	0.030537	0.993808	626	3	1.0332
Tnnc2	4	0.99338	0.98399	1	19338	0	0.44212	0.0066221	0.030537	0.993808	627	4	0.44212
Leng9	4	0.19884	0.20533	0.617435	6830	3	-0.59479	0.006643	0.030537	0.993808	628	1	-0.59479
Irf3	4	0.98414	0.96241	1	19080	0	1.0933	0.0066447	0.030537	0.993808	629	2	1.0933
Prex1	4	0.98916	0.97254	1	19214	0	1.5505	0.0066693	0.03104	1	630	4	1.5505
Kcnj9	4	0.99332	0.98326	1	19337	0	0.72426	0.0066844	0.031206	1	631	4	0.72426
Rnase2a	4	0.81124	0.72746	0.945545	15848	1	0.16443	0.0066942	0.031378	1	632	2	0.16443
Hacd3	4	0.59481	0.55614	0.859415	13304	2	0.75027	0.0066988	0.031378	1	633	2	0.75027
Atp4b	4	0.026953	0.025496	0.220867	2296	1	1.3257	0.0067086	0.031379	1	634	3	1.3257
Tjp2	4	0.99328	0.98289	1	19336	0	1.0374	0.0067205	0.031542	1	635	4	1.0374
Cdca2	4	0.99245	0.98048	1	19312	0	1.0662	0.0067247	0.031542	1	636	4	1.0662
Dffa	4	0.9932	0.98251	1	19334	0	0.96162	0.0067697	0.031893	1	637	4	0.96162
Lman1	4	0.99322	0.98251	1	19335	0	1.3016	0.0067823	0.031893	1	638	4	1.3016
Actl11	4	0.99319	0.98251	1	19333	0	1.1951	0.0068054	0.031893	1	639	4	1.1951
Ikzf5	4	0.99319	0.98251	1	19332	0	0.91777	0.0068066	0.031893	1	640	4	0.91777
Kcnma1	4	0.99318	0.98251	1	19331	0	0.65678	0.0068225	0.031894	1	641	4	0.65678
Zfp275	4	0.97923	0.9526	1	18957	0	1.1023	0.0068376	0.031894	1	642	3	1.1023
Sirt7	4	0.99316	0.98251	1	19330	0	0.74891	0.0068396	0.031894	1	643	4	0.74891
Pstpip1	4	0.99315	0.98251	1	19329	0	0.83353	0.0068469	0.031894	1	644	4	0.83353
Drd5	4	0.61331	0.58028	0.876424	13625	2	-0.080457	0.0068477	0.031894	1	645	2	-0.080457
Asb1	4	0.59214	0.55402	0.859415	13248	1	1.5615	0.006867	0.032056	1	646	3	1.5615
Alk	4	0.99312	0.98251	1	19328	0	1.0774	0.0068764	0.032056	1	647	4	1.0774
Cyp2j13	4	0.99311	0.98251	1	19327	0	0.51263	0.0068936	0.032057	1	648	4	0.51263
Psenen	4	0.99311	0.98251	1	19326	0	0.70105	0.0068948	0.032057	1	649	4	0.70105
Olfr1444	4	0.82601	0.73975	0.950082	16014	1	1.0386	0.0068988	0.032057	1	650	2	1.0386
Olfr923	4	0.50736	0.47486	0.813603	11996	2	0.68207	0.0069069	0.032215	1	651	2	0.68207
Slc4a1ap	4	0.45007	0.42798	0.790892	11127	2	-0.16505	0.00695	0.032215	1	652	2	-0.16505
Dcdc2c	4	0.31835	0.32988	0.719644	9365	2	0.077218	0.0070012	0.032723	1	653	2	0.077218
Fam46c	4	0.99299	0.98213	1	19325	0	0.61133	0.0070062	0.032723	1	654	4	0.61133
Bmpr1a	4	0.23302	0.24233	0.651971	7620	2	0.73003	0.0070777	0.033259	1	655	2	0.73003
Derl2	4	0.99009	0.97568	1	19239	0	1.8867	0.0070796	0.033259	1	656	4	1.8867
Grap	4	0.99291	0.98155	1	19324	0	0.44943	0.0070913	0.033259	1	657	4	0.44943
Lipa	4	0.99291	0.98155	1	19323	0	1.2403	0.0070938	0.033259	1	658	4	1.2403
Pdlim3	4	0.99099	0.97736	1	19270	0	1.2443	0.0071384	0.033572	1	659	4	1.2443
Cdk14	4	0.9928	0.98134	1	19321	0	0.92699	0.0072	0.033929	1	660	4	0.92699
Lgi4	4	0.36812	0.36808	0.750999	10068	1	0.42274	0.0072058	0.033929	1	661	2	0.42274
Olfr1182	4	0.96456	0.91321	1	18545	0	1.6723	0.0072147	0.033929	1	662	3	1.6723
Cldn15	4	0.99276	0.98134	1	19320	0	0.45182	0.0072446	0.03393	1	663	4	0.45182
Tdrd12	4	0.95216	0.89432	1	18210	0	1.2103	0.007276	0.03393	1	664	3	1.2103
Zc3hav1	4	0.95977	0.9031	1	18418	0	1.5194	0.0072811	0.03393	1	665	3	1.5194
Ttc7b	4	0.098435	0.11326	0.505687	4553	2	-0.27084	0.0073016	0.03393	1	666	2	-0.27084
Abhd14b	4	0.9709	0.92668	1	18720	0	1.2128	0.0073118	0.03393	1	667	3	1.2128
Clgn	4	0.99265	0.98114	1	19319	0	0.777	0.0073499	0.034111	1	668	4	0.777
Hist2h3c2	3	0.77187	0.65766	0.914122	15478	1	1.7644	0.0073581	0.021288	0.88557	669	2	1.7644
Hif1an	4	0.34302	0.34657	0.731089	9719	2	-0.38368	0.0073592	0.034111	1	670	2	-0.38368
Fgf4	4	0.99264	0.98114	1	19318	0	0.75147	0.0073628	0.034281	1	671	4	0.75147
Clec5a	4	0.99263	0.98114	1	19317	0	0.58787	0.0073679	0.034281	1	672	4	0.58787
Maf	4	0.00695	0.0080427	0.133462	1174	1	1.0542	0.0073766	0.034281	1	673	3	1.0542
Capn7	4	0.85712	0.76404	0.95885	16443	1	1.2068	0.0073788	0.034281	1	674	3	1.2068
Mal	4	0.99259	0.9807	1	19316	0	0.5168	0.0074055	0.034674	1	675	4	0.5168
Gata5	4	0.26199	0.27575	0.679865	8302	3	-0.61222	0.0074103	0.034674	1	676	1	-0.61222
B4galt5	4	0.37776	0.37614	0.756507	10202	1	1.1992	0.00742	0.034674	1	677	3	1.1992
St13	4	0.99257	0.9807	1	19314	0	0.79918	0.0074289	0.034675	1	678	4	0.79918
Ywhab	3	0.95127	0.90799	1	18185	0	1.5927	0.0074321	0.021541	0.894287	679	2	1.5927
Mtmr7	4	0.22058	0.23048	0.645345	7322	1	1.0634	0.0074406	0.034675	1	680	2	1.0634
Rac1	4	0.96447	0.91321	1	18541	0	1.1529	0.007444	0.034675	1	681	3	1.1529
Dpy30	4	0.51074	0.47669	0.813603	12044	1	1.4664	0.0074458	0.034675	1	682	3	1.4664
Setd3	4	0.99252	0.9807	1	19313	0	1.1812	0.0074772	0.035677	1	683	4	1.1812
Dll4	4	0.97513	0.94283	1	18827	0	1.047	0.007482	0.035677	1	684	3	1.047
Pcdha7	4	0.3108	0.32399	0.715721	9261	1	0.94168	0.0074872	0.035677	1	685	2	0.94168
Usp28	4	0.11071	0.12913	0.536428	4856	1	1.1747	0.0075182	0.035678	1	686	3	1.1747
Olfr125	4	0.95916	0.9024	1	18398	0	1.3618	0.0075468	0.035872	1	687	3	1.3618
Ptrhd1	4	0.13983	0.14658	0.542112	5484	1	1.3627	0.00756	0.035872	1	688	3	1.3627
Calml4	4	0.43209	0.41599	0.786569	10891	2	-0.428	0.0075638	0.035872	1	689	1	-0.428
Lingo2	4	0.99243	0.98048	1	19311	0	1.0279	0.0075652	0.035872	1	690	4	1.0279
Mrap2	4	0.89619	0.80602	0.976376	17029	1	1.015	0.0075861	0.035872	1	691	2	1.015
Matn1	4	0.90709	0.81819	0.979334	17245	1	1.1701	0.0075908	0.035872	1	692	3	1.1701
4933405L10Rik	4	0.47721	0.44698	0.797252	11557	1	1.696	0.0075965	0.035872	1	693	3	1.696
Tac2	4	0.99239	0.98048	1	19309	0	0.87617	0.0076115	0.035872	1	694	4	0.87617
H2-Aa	4	0.85783	0.76593	0.960217	16451	1	0.58725	0.0076149	0.035872	1	695	3	0.58725
Lrrc25	4	0.99238	0.98048	1	19308	0	1.1144	0.0076154	0.035872	1	696	4	1.1144
Mutyh	4	0.99238	0.98029	1	19307	0	1.1969	0.0076234	0.036054	1	697	4	1.1969
Cts6	4	0.3627	0.36348	0.745813	9999	2	0.16707	0.0076593	0.036248	1	698	2	0.16707
Pipox	4	0.33642	0.34444	0.730627	9633	2	-0.47133	0.007666	0.036455	1	699	1	-0.47133
Was	4	0.90803	0.82097	0.981629	17257	1	1.377	0.0076856	0.036635	1	700	3	1.377
Fam219b	4	0.99231	0.97984	1	19306	0	0.50776	0.007694	0.036635	1	701	4	0.50776
Adipor1	4	0.77252	0.70126	0.932472	15487	1	1.1293	0.0077118	0.036635	1	702	3	1.1293
Zfp367	4	0.98894	0.972	1	19211	0	1.4093	0.0077171	0.036636	1	703	4	1.4093
Tank	4	0.61406	0.58244	0.878661	13638	2	-0.18123	0.0077171	0.036636	1	704	1	-0.18123
Actl9	4	0.99227	0.97984	1	19305	0	0.62423	0.0077287	0.036636	1	705	4	0.62423
Rbfox1	4	0.57732	0.53988	0.854835	13006	1	1.08	0.0077328	0.036636	1	706	3	1.08
Xylt2	4	0.99226	0.97984	1	19304	0	0.52142	0.0077381	0.036636	1	707	4	0.52142
Adamts3	4	0.99224	0.97984	1	19303	0	1.027	0.0077583	0.036812	1	708	4	1.027
P3h2	4	0.97824	0.95087	1	18929	0	1.1551	0.0077663	0.036998	1	709	3	1.1551
Lrrc38	4	0.56418	0.52687	0.845594	12810	2	-0.31708	0.0077683	0.036998	1	710	1	-0.31708
Rpap3	4	0.63631	0.60447	0.885225	14031	1	1.4835	0.0077686	0.036998	1	711	3	1.4835
Arpc2	4	0.24419	0.25872	0.672821	7881	1	1.4875	0.0077698	0.036998	1	712	3	1.4875
Slc7a7	4	0.99221	0.97984	1	19302	0	1.2866	0.0077946	0.036998	1	713	4	1.2866
Neurl1b	4	0.15316	0.16281	0.572199	5772	1	0.90799	0.0078044	0.036998	1	714	3	0.90799
Klk15	4	0.99218	0.97984	1	19301	0	0.90535	0.0078203	0.036998	1	715	4	0.90535
Lnx1	4	0.99216	0.97984	1	19300	0	0.48281	0.0078352	0.037173	1	716	4	0.48281
Pin1rt1	4	0.87022	0.77428	0.962277	16607	1	1.7227	0.0078742	0.037173	1	717	3	1.7227
Olfr307	4	0.33865	0.34444	0.730627	9659	1	1.3549	0.0078917	0.037173	1	718	3	1.3549
Trub1	4	0.97544	0.94376	1	18835	0	1.1123	0.0078923	0.037173	1	719	3	1.1123
Mak	4	0.57144	0.53447	0.850988	12918	1	1.2799	0.007913	0.037546	1	720	3	1.2799
Dtna	4	0.97086	0.92668	1	18719	0	1.32	0.0079217	0.037546	1	721	3	1.32
Mafb	4	0.99208	0.97963	1	19299	0	0.47661	0.0079222	0.037546	1	722	4	0.47661
Spesp1	4	0.99206	0.97963	1	19298	0	1.327	0.0079427	0.037546	1	723	4	1.327
Spam1	4	0.98862	0.97145	1	19202	0	1.2923	0.0079444	0.037546	1	724	4	1.2923
Hint3	4	0.58243	0.54845	0.857416	13090	2	0.80822	0.007945	0.037546	1	725	2	0.80822
Rhag	4	0.99204	0.97963	1	19297	0	0.67032	0.0079551	0.037546	1	726	4	0.67032
Serpinb9f	4	0.8916	0.80226	0.975383	16960	1	1.3314	0.0079663	0.037546	1	727	3	1.3314
Olfr1220	4	0.34128	0.34586	0.731089	9689	1	0.96059	0.007993	0.037546	1	728	2	0.96059
Tmem8c	4	0.36735	0.36733	0.750485	10055	2	0.55847	0.0080037	0.037546	1	729	2	0.55847
Tmprss7	4	0.28804	0.30573	0.700979	8913	1	1.4501	0.0080091	0.037546	1	730	3	1.4501
Zmynd19	4	0.99199	0.97963	1	19296	0	0.77554	0.00801	0.037546	1	731	4	0.77554
Alpk1	4	0.96484	0.91386	1	18554	0	1.1406	0.008015	0.037546	1	732	3	1.1406
Zcchc16	4	0.90759	0.81912	0.979989	17251	1	1.5832	0.0080264	0.037546	1	733	3	1.5832
Tob2	4	0.75974	0.69381	0.931318	15348	1	0.85069	0.0080413	0.037546	1	734	2	0.85069
Cxcl2	4	0.99194	0.97963	1	19294	0	1.0345	0.0080611	0.037547	1	735	4	1.0345
Arsj	4	0.99193	0.97963	1	19293	0	0.66192	0.0080652	0.037547	1	736	4	0.66192
Plch1	4	0.96967	0.92429	1	18682	0	0.76809	0.008075	0.037547	1	737	3	0.76809
AY074887	4	0.99192	0.97963	1	19292	0	0.66245	0.0080818	0.037547	1	738	4	0.66245
Olfr866	4	0.90071	0.81164	0.976817	17130	1	0.82679	0.0081166	0.037547	1	739	2	0.82679
Eif3b	4	0.99188	0.97963	1	19291	0	1.0878	0.0081179	0.037547	1	740	4	1.0878
Slxl1	4	0.31029	0.32399	0.715721	9252	2	0.017044	0.0081261	0.037547	1	741	2	0.017044
Ccdc73	4	0.43505	0.4207	0.790892	10926	2	0.4364	0.0081273	0.037547	1	742	2	0.4364
Megf9	4	0.92272	0.846	0.993541	17547	1	1.1735	0.0081327	0.037547	1	743	2	1.1735
Vmn1r104	4	0.69794	0.65937	0.914122	14816	1	0.91751	0.0082138	0.037926	1	744	2	0.91751
Krt15	4	0.99178	0.97921	1	19290	0	0.59005	0.0082185	0.038109	1	745	4	0.59005
Uspl1	4	0.37831	0.37614	0.756507	10208	2	0.93655	0.0082193	0.038109	1	746	2	0.93655
Fam196b	4	0.99177	0.97921	1	19289	0	0.54611	0.0082312	0.038109	1	747	4	0.54611
Zeb2	4	0.99176	0.97921	1	19288	0	1.5153	0.0082354	0.038109	1	748	4	1.5153
Hbq1b	4	0.97667	0.94693	1	18872	0	1.363	0.0082385	0.038109	1	749	3	1.363
1110059G10Rik	4	0.84017	0.74719	0.951707	16195	1	1.0426	0.0082627	0.038109	1	750	3	1.0426
Olfr448	4	0.98678	0.96792	1	19149	0	1.6304	0.0082664	0.038109	1	751	4	1.6304
Gpr62	4	0.91835	0.8386	0.991099	17453	1	1.0935	0.0082734	0.038109	1	752	3	1.0935
Sh2d7	4	0.99172	0.97921	1	19287	0	0.85026	0.0082847	0.038109	1	753	4	0.85026
Dcun1d1	4	0.99169	0.97896	1	19286	0	0.83353	0.0083087	0.038326	1	754	4	0.83353
Erlec1	4	0.99168	0.97896	1	19285	0	0.51601	0.0083172	0.038326	1	755	4	0.51601
Cmip	4	0.1429	0.14779	0.542112	5550	1	1.1332	0.0083178	0.038326	1	756	3	1.1332
Tnfaip8	4	0.81973	0.73599	0.950082	15952	1	1.0161	0.0083271	0.038326	1	757	3	1.0161
Vmn1r223	4	0.98329	0.96064	1	19057	0	1.125	0.0083388	0.038988	1	758	3	1.125
Olfr1414	4	0.9916	0.97851	1	19284	0	0.64044	0.008404	0.039599	1	759	4	0.64044
Sult1c2	4	0.61642	0.58566	0.878958	13686	2	0.55635	0.0084838	0.039919	1	760	2	0.55635
Nod2	4	0.93841	0.87166	1	17915	0	1.2201	0.0084872	0.039919	1	761	3	1.2201
Fbxw5	4	0.99149	0.97827	1	19282	0	1.2358	0.008513	0.040128	1	762	4	1.2358
Ccl27a	4	0.98652	0.96792	1	19138	0	1.053	0.0085133	0.040128	1	763	4	1.053
4930590J08Rik	4	0.47604	0.44698	0.797252	11540	1	-0.11124	0.0085349	0.040476	1	764	1	-0.11124
Alb	4	0.79344	0.71529	0.938179	15688	1	1.1228	0.0085442	0.040476	1	765	3	1.1228
Ms4a15	4	0.54283	0.50226	0.828712	12494	1	0.91366	0.0085476	0.040476	1	766	3	0.91366
Reep5	4	0.99144	0.97827	1	19281	0	0.86756	0.0085563	0.040476	1	767	4	0.86756
Tasp1	4	0.29118	0.31255	0.710226	8988	1	0.87264	0.0085587	0.040476	1	768	2	0.87264
Enpep	4	0.99142	0.97827	1	19280	0	0.74374	0.008578	0.040476	1	769	4	0.74374
Olfr1265	4	0.10897	0.12719	0.536251	4816	1	1.0011	0.0085974	0.040476	1	770	3	1.0011
Fam171a2	4	0.61694	0.58566	0.878958	13692	2	0.76435	0.0086528	0.040893	1	771	2	0.76435
P4ha2	4	0.99132	0.97757	1	19279	0	0.89721	0.0086829	0.04165	1	772	4	0.89721
Xrra1	4	0.62714	0.59607	0.883583	13850	1	0.34649	0.0087393	0.04165	1	773	2	0.34649
Rab11a	4	0.97969	0.95339	1	18972	0	1.307	0.0087531	0.041651	1	774	3	1.307
Ptger1	4	0.38528	0.38157	0.760749	10285	1	0.85823	0.0087904	0.041651	1	775	3	0.85823
St3gal5	4	0.70934	0.66672	0.920353	14910	1	1.1392	0.0088202	0.042209	1	776	3	1.1392
Papd7	4	0.99117	0.97736	1	19276	0	0.94711	0.008833	0.042209	1	777	4	0.94711
Gm5891	4	0.99114	0.97736	1	19275	0	1.055	0.0088612	0.042392	1	778	4	1.055
Adcy6	4	0.99112	0.97736	1	19274	0	1.0942	0.0088761	0.042392	1	779	4	1.0942
Npy2r	4	0.30899	0.32399	0.715721	9236	2	-0.57411	0.0088926	0.042393	1	780	1	-0.57411
Adcy5	4	0.95207	0.89432	1	18208	0	1.1731	0.0089205	0.042565	1	781	3	1.1731
Mup8	4	0.22688	0.23685	0.648021	7463	2	-0.96729	0.0089436	0.042916	1	782	2	-0.96729
Fem1b	4	0.99103	0.97736	1	19272	0	0.94876	0.0089671	0.042916	1	783	4	0.94876
Olfr1512	4	0.4955	0.46471	0.809836	11832	2	0.659	0.0089835	0.042916	1	784	2	0.659
Chrnb4	4	0.99101	0.97736	1	19271	0	0.60597	0.0089881	0.042916	1	785	4	0.60597
Elfn1	4	0.59311	0.55614	0.859415	13269	2	-0.033531	0.0089947	0.042917	1	786	2	-0.033531
Tfap2e	4	0.50019	0.4689	0.811107	11903	1	1.0608	0.0090063	0.042917	1	787	3	1.0608
Ap3s1	4	0.29542	0.31707	0.713202	9048	2	-0.56206	0.0090458	0.042917	1	788	1	-0.56206
Olfr829	4	0.80458	0.72275	0.94329	15781	1	1.1827	0.0090581	0.04312	1	789	3	1.1827
Chodl	4	0.66049	0.63408	0.90177	14465	1	1.0964	0.0090606	0.04312	1	790	3	1.0964
Sephs1	4	0.87484	0.77983	0.965045	16674	1	1.528	0.0090927	0.043121	1	791	3	1.528
Zfp516	4	0.9909	0.97736	1	19269	0	0.48112	0.0091012	0.043121	1	792	4	0.48112
Cftr	4	0.8817	0.78645	0.966289	16786	1	1.3745	0.0091083	0.043121	1	793	3	1.3745
Cmc2	4	0.99089	0.97736	1	19268	0	0.64489	0.0091088	0.043121	1	794	4	0.64489
Tmcc2	4	0.99086	0.97712	1	19267	0	0.95497	0.0091422	0.044124	1	795	4	0.95497
Lalba	4	0.9842	0.96241	1	19083	0	1.3348	0.0091425	0.044124	1	796	3	1.3348
Olfr632	4	0.99085	0.97712	1	19266	0	0.56931	0.0091468	0.044124	1	797	4	0.56931
Crlf2	4	0.52201	0.48711	0.822756	12190	2	0.042106	0.009148	0.044124	1	798	2	0.042106
Tbc1d12	4	0.9579	0.90024	1	18358	0	0.99779	0.0091539	0.044125	1	799	3	0.99779
Tex19.2	4	0.99083	0.97712	1	19265	0	0.8055	0.0091696	0.044306	1	800	4	0.8055
Gprc5a	4	0.99081	0.97689	1	19264	0	0.54716	0.009191	0.044511	1	801	4	0.54716
Osbpl8	4	0.12676	0.13905	0.538581	5197	3	-0.76059	0.009199	0.044511	1	802	1	-0.76059
Apcdd1	4	0.32339	0.33476	0.72401	9435	1	1.3083	0.009202	0.044511	1	803	3	1.3083
Gm11563	4	0.9908	0.97689	1	19263	0	0.40035	0.0092032	0.044511	1	804	4	0.40035
Tmprss11g	4	0.41084	0.39678	0.769356	10615	1	0.99526	0.0092053	0.044511	1	805	2	0.99526
Adamts19	4	0.99077	0.97689	1	19262	0	0.86121	0.0092323	0.044512	1	806	4	0.86121
Crip2	4	0.56365	0.52592	0.845594	12804	1	1.4787	0.0092339	0.044512	1	807	3	1.4787
Prdm10	4	0.013411	0.012136	0.15269	1615	3	-5.3475	0.0092501	0.044512	1	808	1	-5.3475
Cabp2	4	0.35716	0.35863	0.742779	9915	1	1.0684	0.0092595	0.044722	1	809	3	1.0684
Cyp27b1	4	0.67323	0.64529	0.90561	14625	1	0.034445	0.0093012	0.044901	1	810	1	0.034445
Phf3	4	0.56819	0.5322	0.850988	12873	2	0.75602	0.0093028	0.044901	1	811	2	0.75602
Ccdc43	4	0.99068	0.97666	1	19260	0	0.62445	0.0093245	0.044902	1	812	4	0.62445
H13	4	0.47882	0.44992	0.800475	11585	1	1.2666	0.0093315	0.044902	1	813	3	1.2666
Lamp1	4	0.99066	0.97666	1	19259	0	1.0522	0.0093369	0.044902	1	814	4	1.0522
Unc5cl	4	0.64339	0.61593	0.890562	14165	1	0.98613	0.0093522	0.044902	1	815	2	0.98613
Glmp	4	0.55813	0.51761	0.837699	12719	1	1.1782	0.0093661	0.045123	1	816	3	1.1782
Sptssa	4	0.52429	0.48938	0.822756	12219	1	0.9785	0.0093752	0.045123	1	817	3	0.9785
Cdv3	4	0.99062	0.9764	1	19258	0	1.0754	0.0093786	0.045123	1	818	4	1.0754
Syt4	4	0.99062	0.9764	1	19257	0	1.0893	0.0093802	0.045123	1	819	4	1.0893
Rbbp7	4	0.98758	0.96908	1	19176	0	1.0807	0.0093892	0.045123	1	820	4	1.0807
Vegfa	4	0.27456	0.28822	0.685043	8604	3	-0.4844	0.0094033	0.045124	1	821	1	-0.4844
Prps1l1	4	0.99058	0.9764	1	19256	0	0.51452	0.0094174	0.045124	1	822	4	0.51452
Pcdhb12	4	0.43159	0.41516	0.786151	10880	1	1.2058	0.009441	0.045553	1	823	3	1.2058
Vmn2r19	4	0.99056	0.97615	1	19255	0	0.95826	0.0094423	0.045553	1	824	4	0.95826
Ovol2	4	0.99054	0.97615	1	19254	0	0.76474	0.0094626	0.04574	1	825	4	0.76474
Olfml2a	4	0.99053	0.97615	1	19253	0	0.86564	0.0094689	0.04574	1	826	4	0.86564
Olfr355	4	0.99046	0.97615	1	19252	0	0.61014	0.009544	0.045741	1	827	4	0.61014
Clk1	4	0.6411	0.61181	0.890562	14117	2	0.83608	0.0095515	0.045741	1	828	2	0.83608
Rps6ka2	4	0.99044	0.97615	1	19251	0	0.42848	0.0095644	0.045741	1	829	4	0.42848
Gad2	4	0.8652	0.77053	0.960217	16544	1	1.0732	0.0095923	0.045939	1	830	2	1.0732
Rgs4	4	0.52582	0.4903	0.822756	12245	1	0.96758	0.009599	0.045939	1	831	3	0.96758
Hes7	4	0.88429	0.79011	0.968698	16823	1	1.5363	0.0096039	0.046149	1	832	3	1.5363
Esp8	4	0.6149	0.58458	0.878958	13653	1	1.0073	0.0096067	0.046149	1	833	3	1.0073
Tgm6	4	0.76127	0.69656	0.931762	15365	1	0.65578	0.0096075	0.046149	1	834	2	0.65578
Mtf1	4	0.15153	0.15892	0.564765	5742	1	0.96787	0.0096298	0.046149	1	835	3	0.96787
Hdac5	4	0.99036	0.97592	1	19250	0	0.78278	0.009637	0.046149	1	836	4	0.78278
Izumo4	4	0.99033	0.97592	1	19249	0	0.74716	0.0096671	0.04615	1	837	4	0.74716
Pnrc2	4	0.9903	0.97592	1	19248	0	0.84983	0.0097036	0.046553	1	838	4	0.84983
Kcnmb4	4	0.99026	0.97592	1	19246	0	0.60569	0.009737	0.046765	1	839	4	0.60569
Gldn	4	0.80924	0.72653	0.945537	15827	1	0.53852	0.0097607	0.046765	1	840	2	0.53852
Defb38	4	0.99023	0.97592	1	19245	0	0.476	0.0097737	0.046765	1	841	4	0.476
Dbn1	4	0.99022	0.97592	1	19243	0	0.50892	0.0097833	0.046765	1	842	4	0.50892
Otud5	4	0.99021	0.97592	1	19242	0	0.88194	0.0097913	0.046765	1	843	4	0.88194
B020031M17Rik	4	0.17803	0.18582	0.598876	6350	2	0.46094	0.0098209	0.046765	1	844	2	0.46094
Nr1d2	4	0.99017	0.97592	1	19241	0	0.62369	0.0098266	0.046765	1	845	4	0.62369
Trim54	4	0.99017	0.97592	1	19240	0	0.8725	0.009833	0.046988	1	846	4	0.8725
Nsd1	4	0.8617	0.76775	0.960217	16489	1	1.2528	0.0098564	0.046988	1	847	3	1.2528
Foxb1	4	0.11311	0.1301	0.536428	4907	1	1.2039	0.0098623	0.046988	1	848	3	1.2039
Gpx2	4	0.23928	0.25166	0.666229	7757	1	1.4351	0.0098626	0.046988	1	849	3	1.4351
Hmgcl	4	0.75172	0.68912	0.929071	15271	1	0.021679	0.0098628	0.046988	1	850	1	0.021679
Ubr5	4	0.9827	0.95991	1	19039	0	1.4253	0.0098809	0.046989	1	851	3	1.4253
Tex15	4	0.72062	0.67421	0.922837	14999	1	0.90601	0.0098966	0.046989	1	852	3	0.90601
Olfr791	4	0.24421	0.25872	0.672821	7883	3	-0.29145	0.0099138	0.047207	1	853	1	-0.29145
Cgref1	4	0.99008	0.97568	1	19238	0	0.98376	0.0099152	0.047207	1	854	4	0.98376
Epc1	4	0.83421	0.74347	0.950082	16122	1	1.4292	0.0099227	0.047207	1	855	3	1.4292
Trim40	4	0.99006	0.97568	1	19237	0	0.65108	0.0099443	0.047207	1	856	4	0.65108
Sprr2b	4	0.99004	0.97568	1	19236	0	0.89613	0.0099605	0.047207	1	857	4	0.89613
Prpf4	4	0.063823	0.063485	0.347914	3729	3	-4.2539	0.0099649	0.047207	1	858	1	-4.2539
Ccl1	4	0.99	0.97568	1	19235	0	1.0472	0.0099962	0.047207	1	859	4	1.0472
Gm4302	4	0.98996	0.97568	1	19234	0	1.1164	0.010035	0.047418	1	860	4	1.1164
Tacr3	4	0.98995	0.97568	1	19233	0	0.96098	0.010053	0.047418	1	861	4	0.96098
Golgb1	4	0.16854	0.18044	0.598876	6110	1	1.0467	0.010059	0.047418	1	862	3	1.0467
Lgals7	4	0.98993	0.97568	1	19232	0	0.71196	0.010073	0.047419	1	863	4	0.71196
Vwce	4	0.015466	0.013544	0.157083	1720	2	-0.30991	0.010118	0.048043	1	864	1	-0.30991
Araf	4	0.057029	0.058619	0.336063	3561	2	0.36971	0.01013	0.048043	1	865	2	0.36971
Lancl1	4	0.98986	0.97568	1	19231	0	0.72529	0.010145	0.048044	1	866	4	0.72529
Mbtd1	4	0.97339	0.93549	1	18780	0	1.1707	0.010184	0.048275	1	867	3	1.1707
Eps15	4	0.9898	0.97541	1	19230	0	1.2018	0.010198	0.048275	1	868	4	1.2018
Dlat	4	0.29613	0.31707	0.713202	9054	2	0.17431	0.01025	0.048698	1	869	2	0.17431
Zfp689	4	0.98975	0.97517	1	19229	0	0.46196	0.010252	0.048698	1	870	4	0.46196
Pdlim7	4	0.54557	0.50576	0.830928	12539	2	0.062072	0.010271	0.048698	1	871	2	0.062072
Gm10104	3	0.1154	0.13108	0.536428	4963	2	-1.687	0.010282	0.030202	0.993808	872	1	-1.687
Znfx1	4	0.73452	0.68072	0.925816	15123	1	1.2532	0.010288	0.048698	1	873	3	1.2532
Lrrc32	4	0.64471	0.61593	0.890562	14192	1	1.5236	0.010293	0.048698	1	874	3	1.5236
Gm20854	4	0.55685	0.51761	0.837699	12694	2	0.035155	0.010322	0.048923	1	875	2	0.035155
Csn2	4	0.98968	0.97492	1	19228	0	0.5681	0.010324	0.048923	1	876	4	0.5681
Thumpd3	4	0.95368	0.89582	1	18242	0	0.98946	0.010331	0.049155	1	877	3	0.98946
Fam217a	4	0.75442	0.69098	0.930153	15294	1	1.2694	0.010366	0.049745	1	878	3	1.2694
Bdnf	4	0.98963	0.9744	1	19227	0	0.55575	0.010367	0.049745	1	879	4	0.55575
Adamdec1	4	0.98963	0.97415	1	19226	0	0.64751	0.010372	0.049964	1	880	4	0.64751
Csrp3	4	0.97449	0.93852	1	18810	0	1.0899	0.010373	0.049964	1	881	3	1.0899
Zfp580	4	0.98961	0.97415	1	19225	0	0.43565	0.010389	0.049964	1	882	4	0.43565
Hopx	4	0.40627	0.39442	0.767986	10553	2	0.47908	0.010419	0.049964	1	883	2	0.47908
Aknad1	4	0.95072	0.89053	1	18174	0	1.0581	0.01042	0.049964	1	884	3	1.0581
Hsd3b2	4	0.14569	0.15529	0.561921	5619	2	0.17425	0.010424	0.049965	1	885	2	0.17425
Serpinb6b	4	0.98957	0.97415	1	19224	0	0.61264	0.010434	0.049965	1	886	4	0.61264
Rhd	4	0.58458	0.54845	0.857416	13126	1	1.2818	0.010437	0.049965	1	887	3	1.2818
F2r	4	0.79317	0.71529	0.938179	15683	1	1.0725	0.01045	0.049965	1	888	3	1.0725
Col17a1	4	0.98955	0.97415	1	19223	0	0.64518	0.010453	0.049965	1	889	4	0.64518
Skint3	4	0.98953	0.97415	1	19222	0	0.37038	0.010466	0.049965	1	890	4	0.37038
Ocrl	4	0.28159	0.2957	0.689644	8758	3	-0.5181	0.010475	0.049965	1	891	1	-0.5181
Selt	4	0.98949	0.97361	1	19221	0	0.96928	0.01051	0.050445	1	892	4	0.96928
Ankrd63	4	0.40987	0.39518	0.767986	10600	1	0.075427	0.010526	0.050446	1	893	2	0.075427
Rnf180	4	0.88568	0.79198	0.968698	16849	1	0.89313	0.010547	0.050446	1	894	2	0.89313
Thbs3	4	0.26081	0.27575	0.679865	8270	3	-0.49973	0.010577	0.050909	1	895	1	-0.49973
Agap2	4	0.98941	0.97308	1	19220	0	0.41957	0.010586	0.050909	1	896	4	0.41957
Lrp11	4	0.34515	0.35011	0.736592	9745	2	-0.05196	0.010628	0.05091	1	897	1	-0.05196
Mn1	4	0.98936	0.97308	1	19219	0	0.61825	0.010644	0.051139	1	898	4	0.61825
Mon1b	4	0.96142	0.9072	1	18468	0	1.1659	0.010663	0.051139	1	899	3	1.1659
Sin3a	4	0.071779	0.073154	0.382431	3919	3	-2.2639	0.010679	0.051139	1	900	1	-2.2639
Nxf7	4	0.98931	0.97308	1	19218	0	1.0527	0.010688	0.051554	1	901	4	1.0527
Gpr183	4	0.98929	0.97308	1	19217	0	0.7229	0.01071	0.051785	1	902	4	0.7229
Mettl5	4	0.76009	0.69471	0.931762	15354	1	0.29553	0.01073	0.051785	1	903	2	0.29553
Pabpc5	4	0.29803	0.31707	0.713202	9084	1	1.0061	0.010749	0.051785	1	904	2	1.0061
Frmpd4	4	0.92816	0.85162	0.995047	17660	1	1.006	0.010755	0.051785	1	905	2	1.006
Olfr1242	4	0.71708	0.67144	0.922791	14966	1	1.0725	0.010788	0.052254	1	906	3	1.0725
Pcdh9	4	0.97425	0.93852	1	18804	0	1.1986	0.010792	0.052254	1	907	3	1.1986
Gstt3	4	0.57067	0.53447	0.850988	12901	2	0.58771	0.010835	0.052255	1	908	2	0.58771
Gareml	4	0.98477	0.96377	1	19095	0	1.5782	0.010844	0.052255	1	909	3	1.5782
Alox8	4	0.97984	0.95419	1	18978	0	1.3899	0.010866	0.052255	1	910	3	1.3899
Atg3	4	0.98912	0.97254	1	19213	0	0.57616	0.010879	0.052468	1	911	4	0.57616
Cst9	4	0.98912	0.97254	1	19212	0	0.47644	0.010883	0.052468	1	912	4	0.47644
Olfr206	4	0.8078	0.72558	0.945537	15809	1	0.67233	0.010891	0.052468	1	913	2	0.67233
Olfr266	4	0.21025	0.22239	0.640123	7095	2	-0.18071	0.010934	0.052946	1	914	2	-0.18071
Ptprm	4	0.92533	0.84883	0.994711	17599	1	0.24807	0.010985	0.053187	1	915	2	0.24807
Cnbp	4	0.97801	0.95001	1	18918	0	1.1987	0.010997	0.053187	1	916	3	1.1987
Mxd4	4	0.33782	0.34444	0.730627	9647	1	1.0628	0.01103	0.053187	1	917	3	1.0628
Cwh43	4	0.027155	0.025788	0.220867	2309	2	0.018312	0.011036	0.053187	1	918	2	0.018312
Kcnmb3	4	0.98677	0.96792	1	19147	0	1.1335	0.01107	0.053187	1	919	4	1.1335
Fgf20	4	0.25821	0.27323	0.679865	8210	1	0.89959	0.011089	0.053187	1	920	2	0.89959
Ppef1	4	0.84614	0.75188	0.952798	16287	1	0.96319	0.011103	0.053187	1	921	3	0.96319
Gm572	4	0.98288	0.95991	1	19042	0	1.0981	0.011106	0.053187	1	922	3	1.0981
Fgf9	4	0.98888	0.972	1	19210	0	0.54039	0.011124	0.053187	1	923	4	0.54039
Elavl1	3	0.60384	0.53294	0.850988	13453	1	1.5463	0.011136	0.038018	1	924	2	1.5463
Armc6	4	0.28308	0.29841	0.692737	8799	3	-0.63016	0.011138	0.053187	1	925	1	-0.63016
Tacr2	4	0.98886	0.972	1	19209	0	0.7789	0.011143	0.053187	1	926	4	0.7789
Ces3a	4	0.98885	0.972	1	19208	0	0.51499	0.011148	0.053606	1	927	4	0.51499
Rps6ka5	4	0.97389	0.93653	1	18796	0	1.0104	0.011157	0.053606	1	928	3	1.0104
Bach1	4	0.89019	0.79853	0.973477	16931	1	1.0755	0.011185	0.053606	1	929	3	1.0755
Krtap4-7	4	0.071073	0.073153	0.382431	3900	1	1.1889	0.011188	0.053606	1	930	3	1.1889
Prl8a2	4	0.27374	0.28637	0.682929	8583	2	-0.29926	0.011189	0.053606	1	931	1	-0.29926
Cplx4	4	0.9888	0.972	1	19207	0	0.50097	0.011203	0.053606	1	932	4	0.50097
Il6	4	0.84207	0.74999	0.952798	16220	1	1.0118	0.01124	0.053606	1	933	3	1.0118
Rbp7	4	0.68522	0.65	0.908886	14711	1	1.394	0.011281	0.053606	1	934	3	1.394
Pcdha1	4	0.95316	0.89505	1	18233	0	0.86381	0.011287	0.053836	1	935	3	0.86381
Igdcc3	4	0.91366	0.83302	0.988938	17363	1	0.51005	0.011291	0.054467	1	936	3	0.51005
Ddit4l	4	0.87292	0.77704	0.962982	16640	1	1.039	0.011293	0.054467	1	937	3	1.039
Ninj1	4	0.9887	0.972	1	19205	0	0.86663	0.011299	0.054467	1	938	4	0.86663
Gm13290	4	0.98866	0.97173	1	19204	0	0.42615	0.011337	0.054702	1	939	4	0.42615
Ube2d2a	4	0.67996	0.64715	0.906808	14677	1	1.1078	0.011344	0.054952	1	940	3	1.1078
Bmp5	4	0.98865	0.97145	1	19203	0	0.68627	0.011351	0.054952	1	941	4	0.68627
BC049352	4	0.82576	0.73975	0.950082	16009	1	1.2336	0.011361	0.054952	1	942	3	1.2336
Tprn	4	0.95057	0.89053	1	18171	0	0.48965	0.011393	0.054953	1	943	2	0.48965
Zfp536	4	0.98859	0.97115	1	19201	0	0.562	0.011408	0.055216	1	944	4	0.562
Txlnb	4	0.8064	0.72465	0.945347	15799	1	1.0537	0.011444	0.055217	1	945	3	1.0537
Gas1	4	0.98855	0.97115	1	19200	0	0.49454	0.011453	0.055217	1	946	4	0.49454
Pik3r2	4	0.96722	0.91894	1	18621	0	1.1911	0.011481	0.055465	1	947	3	1.1911
Gm13271	4	0.59682	0.55719	0.86052	13336	1	0.092865	0.011495	0.055466	1	948	1	0.092865
Crtc2	4	0.29102	0.31255	0.710226	8984	2	0.62043	0.011537	0.055725	1	949	2	0.62043
Fam13c	4	0.91149	0.83022	0.988659	17316	1	0.26075	0.011546	0.055961	1	950	2	0.26075
Kcnj16	4	0.9848	0.96377	1	19098	0	1.1225	0.011562	0.055961	1	951	3	1.1225
Adh1	4	0.96847	0.92075	1	18652	0	1.2442	0.011593	0.056214	1	952	3	1.2442
Zmym5	4	0.9884	0.97029	1	19199	0	0.70099	0.0116	0.056214	1	953	4	0.70099
Notum	4	0.35141	0.35715	0.742779	9830	1	1.2673	0.011695	0.056214	1	954	3	1.2673
Pepd	4	0.16131	0.17092	0.583375	5975	2	0.24815	0.011699	0.056214	1	955	2	0.24815
Gm21002	4	0.1328	0.14393	0.542112	5341	1	0.42435	0.01175	0.056215	1	956	3	0.42435
Prss56	4	0.98824	0.97029	1	19196	0	0.91488	0.011759	0.056215	1	957	4	0.91488
Gm13023	4	0.969	0.92255	1	18667	0	1.288	0.011767	0.056215	1	958	3	1.288
Gpr160	4	0.95525	0.89657	1	18289	0	1.3919	0.011773	0.056215	1	959	3	1.3919
Dcun1d2	4	0.91586	0.8358	0.990125	17404	1	1.279	0.011776	0.056215	1	960	3	1.279
Pou4f3	4	0.60073	0.56244	0.861731	13407	1	1.039	0.011794	0.056215	1	961	3	1.039
Gfy	4	0.66115	0.63513	0.902271	14479	1	1.1336	0.011797	0.056215	1	962	3	1.1336
C2cd2l	4	0.92519	0.84883	0.994711	17596	1	1.1628	0.0118	0.056215	1	963	3	1.1628
Mbnl2	4	0.8285	0.74068	0.950082	16053	1	0.66604	0.011805	0.056215	1	964	2	0.66604
Ethe1	4	0.93038	0.86008	1	17725	0	0.71579	0.011852	0.056215	1	965	3	0.71579
Npy4r	4	0.51649	0.47894	0.814344	12119	1	1.4178	0.011855	0.056215	1	966	3	1.4178
Smurf2	4	0.33887	0.34444	0.730627	9660	2	0.69899	0.011863	0.056215	1	967	2	0.69899
Gm13283	4	0.82597	0.73975	0.950082	16012	1	1.0021	0.011885	0.056215	1	968	3	1.0021
Elmo2	4	0.3353	0.34444	0.730627	9615	2	0.47014	0.011895	0.056468	1	969	2	0.47014
Cmtm3	4	0.87965	0.78457	0.966279	16756	1	0.83584	0.011928	0.056737	1	970	2	0.83584
Sdk1	4	0.85832	0.76687	0.960217	16457	1	0.97336	0.011929	0.056737	1	971	3	0.97336
Pbld1	4	0.98807	0.9697	1	19195	0	0.69362	0.011934	0.056737	1	972	4	0.69362
Eps15l1	4	0.61761	0.58566	0.878958	13703	2	0.024587	0.011954	0.056737	1	973	2	0.024587
Tapt1	4	0.95667	0.89879	1	18320	0	0.98852	0.011958	0.056737	1	974	3	0.98852
Lcn4	3	0.86265	0.76518	0.960167	16505	1	1.5041	0.01197	0.040331	1	975	2	1.5041
Gpatch4	4	0.98802	0.9697	1	19194	0	1.0059	0.011977	0.056737	1	976	4	1.0059
Nostrin	4	0.98802	0.9697	1	19193	0	0.84319	0.011982	0.056737	1	977	4	0.84319
Grb14	4	0.062774	0.062846	0.345976	3705	3	-1.3281	0.012005	0.056737	1	978	1	-1.3281
Olfr667	4	0.93195	0.86278	1	17765	0	0.93018	0.012031	0.056737	1	979	2	0.93018
Nkap	3	0.713	0.60851	0.888933	14937	1	0.21592	0.012043	0.040331	1	980	1	0.21592
Ciart	4	0.41367	0.39923	0.77143	10658	2	-0.031842	0.012056	0.056737	1	981	2	-0.031842
Cpa4	4	0.98794	0.9697	1	19192	0	0.50256	0.012057	0.056737	1	982	4	0.50256
Rbm7	4	0.9677	0.92014	1	18633	0	1.2571	0.012057	0.056737	1	983	3	1.2571
Eef1b2	3	0.98794	0.97566	1	19191	0	1.1571	0.012063	0.040331	1	984	3	1.1571
4933433C11Rik	4	0.6282	0.59716	0.883583	13873	1	1.2818	0.012077	0.056737	1	985	3	1.2818
Anp32e	4	0.9879	0.9697	1	19190	0	1.0832	0.012104	0.056737	1	986	4	1.0832
Abcg4	4	0.96768	0.92014	1	18632	0	1.2343	0.012124	0.056737	1	987	3	1.2343
Snx8	4	0.74876	0.68911	0.929071	15250	1	1.1796	0.012129	0.056737	1	988	3	1.1796
1700025F22Rik	4	0.86254	0.76863	0.960217	16502	1	1.2641	0.012136	0.056737	1	989	3	1.2641
Plekhf1	4	0.90022	0.81164	0.976817	17119	1	1.0492	0.012142	0.056737	1	990	3	1.0492
Armc8	4	0.98785	0.9697	1	19189	0	0.31608	0.012147	0.056737	1	991	4	0.31608
Zfp94	4	0.98785	0.9697	1	19188	0	0.96524	0.012153	0.056737	1	992	4	0.96524
Fabp1	4	0.066638	0.067902	0.362303	3795	1	1.0585	0.012163	0.056737	1	993	3	1.0585
Dazap2	4	0.98783	0.9697	1	19187	0	0.52365	0.012166	0.056737	1	994	4	0.52365
Abcc2	4	0.49771	0.46616	0.81021	11863	2	-0.20974	0.012209	0.056737	1	995	1	-0.20974
Olfr478	4	0.98779	0.9697	1	19186	0	0.62061	0.012209	0.056737	1	996	4	0.62061
Slc28a2	4	0.98777	0.9697	1	19185	0	0.33244	0.01223	0.05698	1	997	4	0.33244
Tmie	4	0.98776	0.9697	1	19184	0	0.64259	0.012242	0.05698	1	998	4	0.64259
Fut11	4	0.98775	0.9697	1	19183	0	0.47748	0.012249	0.05698	1	999	4	0.47748
Spin2c	4	0.98775	0.9697	1	19182	0	0.58827	0.012251	0.05698	1	1000	4	0.58827
Olfr525	4	0.45626	0.43199	0.790892	11241	1	-0.0047308	0.01226	0.057218	1	1001	1	-0.0047308
Ubxn2a	4	0.9877	0.9697	1	19181	0	0.49835	0.012298	0.057218	1	1002	4	0.49835
Mmp15	3	0.95044	0.90735	1	18168	0	0.57132	0.012311	0.041073	1	1003	2	0.57132
Smim22	4	0.45394	0.43115	0.790892	11197	2	-0.090816	0.012311	0.057503	1	1004	2	-0.090816
Tmem241	4	0.98765	0.96936	1	19179	0	0.79051	0.012348	0.057503	1	1005	4	0.79051
S100g	4	0.98725	0.96821	1	19166	0	0.80765	0.012362	0.057503	1	1006	4	0.80765
Fkbp14	4	0.30093	0.32085	0.715721	9123	2	0.19694	0.012364	0.057503	1	1007	2	0.19694
Otub2	2	0.94528	0.91304	1	18065	0	2.1156	0.012368	0.021691	0.895971	1008	2	2.1156
Vmn2r104	4	0.98763	0.96936	1	19178	0	0.96507	0.012375	0.057503	1	1009	4	0.96507
Colgalt2	4	0.9876	0.96908	1	19177	0	0.92756	0.012403	0.057756	1	1010	4	0.92756
Asxl2	4	0.82753	0.74068	0.950082	16037	1	1.3136	0.012403	0.057756	1	1011	3	1.3136
Rabac1	4	0.18211	0.1884	0.599759	6437	1	0.79313	0.012409	0.057756	1	1012	3	0.79313
Gltscr1l	4	0.3054	0.32333	0.715721	9185	1	0.64974	0.01241	0.057756	1	1013	2	0.64974
Scn3a	4	0.4026	0.39282	0.767986	10507	1	0.58864	0.012413	0.057756	1	1014	2	0.58864
Slc6a5	4	0.98756	0.96908	1	19175	0	0.91384	0.012438	0.057998	1	1015	4	0.91384
Elac2	4	0.13315	0.14393	0.542112	5346	1	1.7156	0.012457	0.058487	1	1016	3	1.7156
Zdhhc18	4	0.98754	0.9688	1	19173	0	0.53218	0.012461	0.058487	1	1017	4	0.53218
Gtf2h4	4	0.055236	0.057656	0.334064	3508	2	-2.2746	0.012463	0.058487	1	1018	2	-2.2746
Fam71d	4	0.98753	0.96879	1	19172	0	0.48138	0.012472	0.058488	1	1019	4	0.48138
Ngly1	4	0.98748	0.96852	1	19171	0	0.84924	0.01252	0.058729	1	1020	4	0.84924
A530099J19Rik	4	0.49869	0.46706	0.81021	11879	1	1.3547	0.012542	0.058729	1	1021	3	1.3547
Golga1	4	0.48036	0.45224	0.803431	11609	1	1.1854	0.012549	0.058729	1	1022	3	1.1854
Gipr	4	0.67332	0.64529	0.90561	14626	1	0.99688	0.012565	0.058729	1	1023	3	0.99688
Vmn2r6	4	0.98743	0.96852	1	19170	0	0.8473	0.012574	0.058729	1	1024	4	0.8473
Ccdc59	4	0.38429	0.38006	0.760679	10272	2	-0.28148	0.012616	0.058976	1	1025	2	-0.28148
Arhgef10l	3	0.98738	0.97464	1	19169	0	0.79123	0.012625	0.041888	1	1026	3	0.79123
Caskin2	4	0.86467	0.76957	0.960217	16534	1	0.93453	0.012641	0.059242	1	1027	2	0.93453
Cops3	3	0.17109	0.17292	0.588758	6171	2	-1.098	0.012693	0.042224	1	1028	1	-1.098
Dbt	4	0.9873	0.96821	1	19168	0	0.91688	0.0127	0.059242	1	1029	4	0.91688
2700062C07Rik	4	0.14819	0.15706	0.561921	5673	2	-2.809	0.012718	0.059243	1	1030	1	-2.809
Art3	4	0.98727	0.96821	1	19167	0	1.0296	0.012731	0.059243	1	1031	4	1.0296
Stk24	4	0.050565	0.048873	0.299855	3323	3	-2.4061	0.012769	0.059243	1	1032	1	-2.4061
Olfr156	4	0.55077	0.50991	0.832484	12603	2	-0.14356	0.01282	0.059905	1	1033	1	-0.14356
Coq9	4	0.98718	0.96821	1	19165	0	0.99267	0.012821	0.059905	1	1034	4	0.99267
Kcnt2	4	0.98717	0.96821	1	19164	0	0.91764	0.012831	0.059905	1	1035	4	0.91764
Ssc5d	4	0.91173	0.83022	0.988659	17319	1	1.0267	0.012834	0.059905	1	1036	3	1.0267
Trim37	3	0.056283	0.050233	0.305924	3544	2	-5.2043	0.012846	0.042472	1	1037	1	-5.2043
Trim15	4	0.47883	0.44992	0.800475	11586	2	0.63619	0.012868	0.059905	1	1038	2	0.63619
Cd38	4	0.88564	0.79198	0.968698	16848	1	0.8932	0.012881	0.059905	1	1039	2	0.8932
Vsig4	4	0.98711	0.96821	1	19163	0	0.56567	0.01289	0.059905	1	1040	4	0.56567
Papd4	4	0.84887	0.75652	0.956452	16317	1	0.91442	0.012903	0.059905	1	1041	3	0.91442
Ndrg1	4	0.98571	0.96509	1	19117	0	1.0281	0.012925	0.059905	1	1042	3	1.0281
Ckap4	4	0.051209	0.049227	0.300061	3350	1	1.2783	0.012928	0.059905	1	1043	3	1.2783
Psmb9	4	0.98705	0.96821	1	19162	0	1.229	0.012947	0.059905	1	1044	4	1.229
Mroh9	4	0.98705	0.96821	1	19161	0	0.53857	0.012949	0.059905	1	1045	4	0.53857
Olfr700	4	0.62952	0.59716	0.883583	13897	1	0.33778	0.012973	0.059905	1	1046	2	0.33778
Npy6r	4	0.98702	0.96821	1	19160	0	0.79619	0.012981	0.059905	1	1047	4	0.79619
Brd3	4	0.987	0.96821	1	19159	0	0.83919	0.013002	0.059905	1	1048	4	0.83919
Prkg2	4	0.70296	0.66118	0.914907	14858	1	0.9186	0.013012	0.059905	1	1049	3	0.9186
Rnf157	4	0.24846	0.26592	0.679237	7979	1	0.94379	0.013024	0.059905	1	1050	2	0.94379
Aldh1b1	4	0.98695	0.96821	1	19158	0	0.79772	0.01305	0.060157	1	1051	4	0.79772
Pxmp4	4	0.076172	0.074998	0.384173	4018	1	0.0015591	0.013075	0.060157	1	1052	1	0.0015591
Tor2a	4	0.98692	0.96821	1	19156	0	0.41735	0.013082	0.060157	1	1053	4	0.41735
Slc10a2	4	0.98248	0.95848	1	19037	0	1.0965	0.013093	0.060157	1	1054	3	1.0965
Knstrn	4	0.72968	0.67608	0.922837	15075	1	0.3459	0.013126	0.060406	1	1055	2	0.3459
Ldb3	4	0.98686	0.96821	1	19154	0	0.45481	0.01314	0.060406	1	1056	4	0.45481
Gm17660	4	0.98684	0.96821	1	19153	0	0.64209	0.013158	0.060406	1	1057	4	0.64209
Ntf3	4	0.22312	0.23443	0.648021	7388	3	-0.72243	0.013177	0.060659	1	1058	1	-0.72243
Sept6	4	0.62352	0.59197	0.881311	13787	1	1.3439	0.013191	0.060659	1	1059	3	1.3439
Cga	4	0.98225	0.95848	1	19032	0	1.1294	0.013202	0.060659	1	1060	3	1.1294
Olfr166	4	0.98679	0.96792	1	19152	0	1.0785	0.01321	0.060659	1	1061	4	1.0785
Il17rd	4	0.89035	0.79853	0.973477	16933	1	1.0325	0.013212	0.060659	1	1062	3	1.0325
Zfp663	4	0.98678	0.96792	1	19151	0	0.67601	0.013216	0.060659	1	1063	4	0.67601
Pramel1	4	0.98678	0.96792	1	19150	0	0.58383	0.013222	0.060659	1	1064	4	0.58383
Ube2t	4	0.00030801	9.29e-05	0.006409	296	3	-4.9478	0.013227	0.060884	1	1065	1	-4.9478
P4ha3	4	0.98677	0.96792	1	19148	0	0.64514	0.01323	0.060884	1	1066	4	0.64514
Stap1	4	0.66914	0.64529	0.90561	14596	1	1.1245	0.013234	0.060884	1	1067	3	1.1245
Fxr1	4	0.98675	0.96792	1	19145	0	0.53719	0.013248	0.060884	1	1068	4	0.53719
Art4	4	0.94852	0.88589	1	18134	0	0.89639	0.013278	0.060884	1	1069	3	0.89639
Sfmbt2	4	0.35102	0.35715	0.742779	9823	2	0.73989	0.013279	0.060884	1	1070	2	0.73989
S100a3	4	0.83621	0.7444	0.9505	16147	1	0.96458	0.013284	0.060884	1	1071	3	0.96458
Egr1	4	0.9867	0.96792	1	19144	0	0.64554	0.013302	0.060884	1	1072	4	0.64554
Asic5	4	0.98668	0.96792	1	19143	0	0.54749	0.013322	0.060884	1	1073	4	0.54749
Msh3	4	0.63019	0.59822	0.883583	13904	2	0.2876	0.013329	0.060884	1	1074	2	0.2876
Vmn1r210	4	0.98667	0.96792	1	19142	0	0.65994	0.01333	0.060884	1	1075	4	0.65994
Klk1b11	4	0.98666	0.96792	1	19141	0	0.57016	0.013342	0.060884	1	1076	4	0.57016
Dyrk1a	4	0.93591	0.86991	1	17855	0	1.075	0.013344	0.060884	1	1077	3	1.075
Wipf3	4	0.63373	0.60342	0.885225	13973	1	1.0764	0.013392	0.060885	1	1078	3	1.0764
P2ry4	4	0.95638	0.89806	1	18316	0	0.99106	0.013395	0.060885	1	1079	3	0.99106
Tlr12	4	0.9866	0.96792	1	19140	0	0.45451	0.013397	0.060885	1	1080	4	0.45451
Rfpl4	4	0.69734	0.65937	0.914122	14810	1	1.0241	0.013423	0.060885	1	1081	3	1.0241
Trim12c	4	0.43451	0.41916	0.790542	10920	1	1.1883	0.01343	0.060885	1	1082	3	1.1883
Iglon5	4	0.44622	0.42798	0.790892	11070	1	0.77113	0.013431	0.060885	1	1083	2	0.77113
Gas2l3	4	0.98653	0.96792	1	19139	0	0.94824	0.013474	0.060885	1	1084	4	0.94824
Gpr155	4	0.76436	0.69746	0.931762	15397	1	1.3714	0.013482	0.060885	1	1085	3	1.3714
Iqgap1	4	0.3532	0.35715	0.742779	9858	2	0.62612	0.013504	0.060885	1	1086	2	0.62612
Mbtps1	4	0.031042	0.02777	0.223556	2507	3	-4.5386	0.013533	0.060885	1	1087	1	-4.5386
Ythdf2	4	0.96971	0.92429	1	18683	0	1.046	0.013573	0.061164	1	1088	3	1.046
Olfr301	4	0.94752	0.88425	1	18107	0	0.49847	0.013584	0.061165	1	1089	2	0.49847
Syt3	4	0.98641	0.9676	1	19137	0	0.39572	0.013594	0.061165	1	1090	4	0.39572
Polr2a	3	0.9864	0.97277	1	19136	0	1.7395	0.013598	0.044274	1	1091	3	1.7395
Fam83c	4	0.045908	0.045053	0.292409	3156	1	1.0299	0.013614	0.061415	1	1092	3	1.0299
Syne2	4	0.9458	0.88425	1	18077	0	1.3151	0.013618	0.061415	1	1093	3	1.3151
Poldip2	4	0.16365	0.17587	0.596526	6021	2	-0.76048	0.013635	0.061415	1	1094	1	-0.76048
Plekhj1	4	0.98634	0.96731	1	19134	0	1.015	0.013656	0.061416	1	1095	4	1.015
9530002B09Rik	4	0.97843	0.95087	1	18935	0	0.97562	0.013666	0.061416	1	1096	3	0.97562
Uchl3	4	0.97277	0.93282	1	18767	0	0.89549	0.013696	0.061677	1	1097	3	0.89549
Zfp213	4	0.91162	0.83022	0.988659	17317	1	1.1603	0.013717	0.061932	1	1098	3	1.1603
Hgd	4	0.87672	0.78264	0.965781	16709	1	1.0953	0.013733	0.061932	1	1099	3	1.0953
Kl	3	0.84517	0.74224	0.950082	16271	1	-0.13475	0.013763	0.045059	1	1100	1	-0.13475
L3mbtl4	4	0.2732	0.28637	0.682929	8574	2	0.35035	0.013779	0.065457	1	1101	2	0.35035
Gpr17	4	0.045034	0.044227	0.29043	3123	2	-1.0095	0.013787	0.065457	1	1102	2	-1.0095
Gm13057	4	0.48216	0.45399	0.803431	11640	2	-0.32821	0.013838	0.065722	1	1103	1	-0.32821
Gtf2h5	4	0.98614	0.96671	1	19131	0	1.0198	0.013861	0.065723	1	1104	4	1.0198
Gzmb	4	0.98614	0.96671	1	19130	0	0.45855	0.013865	0.065723	1	1105	4	0.45855
Olfr724	4	0.93568	0.86817	1	17850	0	0.94194	0.013883	0.065996	1	1106	2	0.94194
Olfr1093	4	0.98612	0.96638	1	19129	0	0.71688	0.013883	0.065996	1	1107	4	0.71688
Wnt10a	4	0.33246	0.34377	0.730627	9569	2	-0.37988	0.013889	0.065997	1	1108	1	-0.37988
Ppp1ca	4	0.95053	0.89053	1	18169	0	1.1902	0.013898	0.065997	1	1109	3	1.1902
Snd1	4	0.86483	0.77053	0.960217	16537	1	1.0306	0.013933	0.066261	1	1110	3	1.0306
Pcdhb1	4	0.98606	0.96638	1	19128	0	0.59359	0.01394	0.066261	1	1111	4	0.59359
Ube2d2b	4	0.614	0.58244	0.878661	13634	2	-0.0095873	0.01394	0.066261	1	1112	2	-0.0095873
Fbln7	4	0.82975	0.74165	0.950082	16070	1	0.77613	0.01395	0.066261	1	1113	3	0.77613
Lsm14b	4	0.078338	0.082057	0.413654	4071	2	-0.094177	0.01398	0.066261	1	1114	2	-0.094177
Pigq	4	0.96166	0.90788	1	18477	0	1.2235	0.013985	0.066261	1	1115	3	1.2235
P3h1	4	0.80461	0.72275	0.94329	15782	1	0.93132	0.014002	0.066261	1	1116	3	0.93132
Olfr1284	4	0.84347	0.75188	0.952798	16240	1	0.82658	0.014008	0.066261	1	1117	3	0.82658
Rhot1	4	0.98599	0.96638	1	19127	0	0.61186	0.014013	0.066261	1	1118	4	0.61186
Oosp1	4	0.97226	0.93118	1	18755	0	0.91968	0.01406	0.066533	1	1119	3	0.91968
Proser3	4	0.98023	0.95498	1	18984	0	1.0287	0.014077	0.066533	1	1120	3	1.0287
Igsf10	4	0.57584	0.53671	0.850988	12987	1	0.85626	0.014083	0.066533	1	1121	3	0.85626
Dtwd1	4	0.98591	0.96638	1	19126	0	0.93096	0.014086	0.066533	1	1122	4	0.93096
Mtnr1b	4	0.58365	0.54845	0.857416	13110	1	1.1709	0.014093	0.066533	1	1123	3	1.1709
Hnrnpd	4	0.86445	0.76957	0.960217	16527	1	1.527	0.014105	0.066796	1	1124	3	1.527
Myoz1	4	0.98588	0.96605	1	19125	0	0.56539	0.014122	0.067074	1	1125	4	0.56539
Olfr397	4	0.98586	0.96605	1	19124	0	1.0777	0.014143	0.067075	1	1126	4	1.0777
Vmn1r47	4	0.18991	0.19647	0.605616	6597	2	-0.11128	0.014144	0.067075	1	1127	1	-0.11128
Havcr2	4	0.92924	0.85636	0.998768	17692	1	1.0905	0.014155	0.067348	1	1128	3	1.0905
E2f5	4	0.98584	0.96573	1	19123	0	0.59591	0.014158	0.067348	1	1129	4	0.59591
Psg29	4	0.98584	0.96573	1	19122	0	0.46789	0.01416	0.067348	1	1130	4	0.46789
Itgam	4	0.52151	0.48575	0.82152	12183	1	1.15	0.014161	0.067348	1	1131	3	1.15
Lpin2	4	0.75451	0.69098	0.930153	15295	1	0.8118	0.014175	0.067348	1	1132	2	0.8118
Klk4	4	0.82134	0.73784	0.950082	15966	1	0.76526	0.014178	0.067348	1	1133	3	0.76526
Serpina7	4	0.65978	0.63309	0.900932	14453	1	0.74311	0.014194	0.067348	1	1134	3	0.74311
Arhgdig	4	0.23074	0.23926	0.649044	7567	1	1.0774	0.014217	0.067348	1	1135	2	1.0774
Depdc1a	4	0.9771	0.94872	1	18887	0	0.67994	0.014245	0.067349	1	1136	3	0.67994
Itln1	4	0.052148	0.05355	0.322318	3379	1	1.3284	0.014287	0.067349	1	1137	3	1.3284
1700020L24Rik	4	0.50025	0.4689	0.811107	11904	2	-0.25479	0.014398	0.067726	1	1138	1	-0.25479
Ciita	4	0.014754	0.013143	0.156663	1691	1	0.75544	0.014499	0.070783	1	1139	3	0.75544
Hsd17b3	4	0.89607	0.80602	0.976376	17027	1	0.30455	0.0145	0.070783	1	1140	2	0.30455
Sms	4	0.97996	0.95419	1	18980	0	1.0107	0.01452	0.070783	1	1141	3	1.0107
2310033P09Rik	4	0.54136	0.50133	0.827443	12475	2	0.1701	0.014551	0.070783	1	1142	2	0.1701
Olfr90	4	0.89783	0.80975	0.976817	17064	1	0.92913	0.014555	0.070783	1	1143	2	0.92913
Aktip	4	0.55169	0.51085	0.833763	12621	1	0.079288	0.014601	0.070783	1	1144	1	0.079288
Slain1	4	0.48219	0.45399	0.803431	11641	1	0.9472	0.014619	0.070783	1	1145	2	0.9472
Ywhaq	4	0.8293	0.74068	0.950082	16064	1	1.1051	0.014626	0.070783	1	1146	3	1.1051
Gmeb1	4	0.98292	0.95991	1	19045	0	1.0431	0.014626	0.070783	1	1147	3	1.0431
Polm	4	0.23643	0.24739	0.659661	7690	1	1.0883	0.014696	0.071294	1	1148	3	1.0883
Pet2	4	0.11518	0.13112	0.536428	4960	1	0.89561	0.0147	0.071294	1	1149	3	0.89561
Arl11	4	0.97607	0.94603	1	18854	0	0.99187	0.014703	0.071294	1	1150	3	0.99187
Wtap	4	0.96852	0.92075	1	18654	0	1.3268	0.01478	0.071294	1	1151	3	1.3268
Plaur	4	0.18295	0.18944	0.599759	6456	1	1.145	0.014783	0.071294	1	1152	3	1.145
Olfr1130	4	0.10369	0.12049	0.517509	4685	3	-1.6224	0.014805	0.071294	1	1153	1	-1.6224
Dennd2a	4	0.37094	0.36977	0.750999	10108	1	1.1931	0.014814	0.071294	1	1154	3	1.1931
Shmt1	4	0.97201	0.93007	1	18749	0	0.97878	0.014871	0.071294	1	1155	3	0.97878
Slfn1	4	0.68498	0.65	0.908886	14707	1	0.301	0.014907	0.071294	1	1156	2	0.301
Vmn2r101	4	0.79671	0.71529	0.938179	15711	1	0.99392	0.014919	0.071294	1	1157	3	0.99392
Pfkl	4	0.72979	0.67608	0.922837	15078	1	1.1558	0.014969	0.071294	1	1158	3	1.1558
Stxbp5	4	0.97177	0.92897	1	18742	0	1.222	0.014997	0.071294	1	1159	3	1.222
Ocm	4	0.24165	0.25474	0.666931	7820	2	-0.65912	0.015008	0.071294	1	1160	2	-0.65912
Adcy8	4	0.90013	0.81164	0.976817	17118	1	0.98671	0.015012	0.071294	1	1161	2	0.98671
Eras	4	0.59832	0.56033	0.861731	13353	1	0.44275	0.015059	0.071674	1	1162	3	0.44275
Olfr495	4	0.79822	0.71621	0.938735	15729	1	1.1099	0.015069	0.071674	1	1163	3	1.1099
Rora	4	0.62631	0.59297	0.881663	13840	1	0.73523	0.01511	0.071675	1	1164	3	0.73523
Tspan13	4	0.39514	0.3872	0.761586	10408	2	0.54573	0.015127	0.072055	1	1165	2	0.54573
Pold4	3	0.75401	0.63824	0.90389	15291	1	1.2937	0.015143	0.048682	1	1166	2	1.2937
Pomgnt1	4	0.026866	0.025496	0.220867	2292	2	-0.50758	0.015262	0.072308	1	1167	2	-0.50758
Hoxb5	4	0.46496	0.43955	0.796939	11363	2	0.4165	0.015313	0.072309	1	1168	2	0.4165
Zbed3	4	0.65994	0.63309	0.900932	14456	2	0.36847	0.015364	0.072568	1	1169	2	0.36847
Nudc	4	0.06743	0.067902	0.362303	3810	3	-3.35	0.015415	0.072568	1	1170	1	-3.35
Cdc42ep3	4	0.48949	0.45975	0.805197	11750	2	0.45189	0.015417	0.072568	1	1171	2	0.45189
Igfbp2	4	0.86715	0.7724	0.961702	16571	1	0.84426	0.015419	0.072568	1	1172	3	0.84426
Ccdc149	4	0.17859	0.18582	0.598876	6364	2	-0.71142	0.015466	0.072846	1	1173	1	-0.71142
Olfr530	4	0.75986	0.69381	0.931318	15350	1	1.1848	0.015475	0.072847	1	1174	3	1.1848
Cdh5	4	0.5503	0.50893	0.832209	12593	1	1.1793	0.015563	0.073488	1	1175	3	1.1793
Rgs12	4	0.90574	0.81636	0.97777	17214	1	-0.11244	0.015567	0.073488	1	1176	1	-0.11244
B3gnt4	4	0.36769	0.36808	0.750999	10060	1	1.4654	0.015606	0.073775	1	1177	3	1.4654
Ak1	4	0.09653	0.11296	0.505687	4508	3	-1.5782	0.015618	0.073775	1	1178	1	-1.5782
Meis1	4	0.63667	0.60447	0.885225	14039	2	0.25575	0.015669	0.073776	1	1179	2	0.25575
Purg	4	0.7054	0.66394	0.918292	14880	1	1.0797	0.015709	0.074054	1	1180	3	1.0797
Cd300lb	4	0.11513	0.13112	0.536428	4959	1	1.493	0.015716	0.074054	1	1181	3	1.493
Capg	3	0.66945	0.57542	0.871074	14598	1	1.3482	0.015737	0.049871	1	1182	2	1.3482
Tacr1	4	0.33119	0.34238	0.730627	9553	1	-0.11357	0.015771	0.074328	1	1183	1	-0.11357
Il10	4	0.019222	0.016054	0.169769	1917	2	-0.31931	0.015822	0.074625	1	1184	1	-0.31931
Olfr1106	4	0.31716	0.32988	0.719644	9349	1	0.11761	0.015872	0.07491	1	1185	2	0.11761
Rala	4	0.8148	0.72938	0.945545	15893	1	0.9109	0.015944	0.074911	1	1186	3	0.9109
H2-DMb2	4	0.9401	0.87253	1	17962	0	0.77027	0.015959	0.074911	1	1187	2	0.77027
Tsc22d2	4	0.68127	0.64715	0.906808	14685	1	1.0667	0.015965	0.074911	1	1188	3	1.0667
Slc7a11	4	0.97898	0.95215	1	18948	0	0.87755	0.015976	0.075192	1	1189	3	0.87755
Cds1	4	0.41011	0.39518	0.767986	10602	1	1.2594	0.015983	0.075192	1	1190	3	1.2594
Map3k9	4	0.64935	0.61791	0.890562	14282	1	0.81982	0.016075	0.07547	1	1191	3	0.81982
Olfr669	4	0.59093	0.55402	0.859415	13228	1	0.82137	0.016076	0.07547	1	1192	3	0.82137
Klf13	4	0.87937	0.78457	0.966279	16751	1	0.80448	0.016089	0.07547	1	1193	3	0.80448
Ankrd66	4	0.025895	0.020848	0.187517	2252	2	-1.4486	0.016126	0.07547	1	1194	1	-1.4486
Epha10	4	0.85392	0.76122	0.95828	16386	1	0.68493	0.016145	0.075749	1	1195	2	0.68493
Hemgn	4	0.28445	0.30036	0.694626	8828	1	0.25352	0.016177	0.075749	1	1196	2	0.25352
Krt6a	4	0.83953	0.74627	0.951013	16189	1	1.0632	0.016182	0.075749	1	1197	3	1.0632
Mypop	4	0.94579	0.88425	1	18076	0	1.1321	0.016182	0.075749	1	1198	3	1.1321
Mboat2	4	0.42023	0.40402	0.773649	10744	2	-0.10255	0.016228	0.07575	1	1199	2	-0.10255
Nrg4	4	0.95849	0.90095	1	18376	0	0.97979	0.016232	0.07575	1	1200	3	0.97979
Ppfibp2	4	0.96395	0.91321	1	18531	0	1.0063	0.016278	0.076163	1	1201	3	1.0063
Tjp3	4	0.63433	0.60342	0.885225	13989	1	0.89584	0.016279	0.076163	1	1202	3	0.89584
Bmper	4	0.78606	0.70973	0.937024	15612	1	1.0227	0.016338	0.076163	1	1203	3	1.0227
Dnajb7	4	0.94781	0.88507	1	18113	0	1.02	0.016425	0.076163	1	1204	3	1.02
Gm2799	4	0.070319	0.072507	0.382431	3881	1	0.92107	0.016428	0.076163	1	1205	2	0.92107
Gldc	4	0.97095	0.92668	1	18722	0	0.81524	0.016429	0.076163	1	1206	3	0.81524
Elavl3	4	0.28055	0.29437	0.689182	8735	2	-0.49314	0.016431	0.076163	1	1207	1	-0.49314
Slc24a5	4	0.85682	0.76404	0.95885	16438	1	0.63536	0.016458	0.076163	1	1208	2	0.63536
Morn2	4	0.36758	0.36733	0.750485	10059	1	0.11571	0.016482	0.076163	1	1209	2	0.11571
Clnk	3	0.98351	0.96585	1	19066	0	0.52166	0.016489	0.052309	1	1210	3	0.52166
Ubl4b	4	0.88328	0.78829	0.968143	16805	1	0.3149	0.016533	0.076163	1	1211	2	0.3149
Ptpn20	4	0.95189	0.89432	1	18205	0	0.98187	0.016548	0.076163	1	1212	3	0.98187
Phka1	4	0.52322	0.48801	0.822756	12207	1	0.86355	0.016578	0.076163	1	1213	2	0.86355
Hs1bp3	4	0.9584	0.90024	1	18373	0	1.0504	0.016588	0.076163	1	1214	3	1.0504
9130011E15Rik	4	0.95675	0.89879	1	18324	0	1.1358	0.016634	0.076163	1	1215	3	1.1358
Tdrd6	4	0.88914	0.79853	0.973477	16914	1	0.97884	0.016639	0.076163	1	1216	3	0.97884
Olfr1044	4	0.98194	0.9581	1	19025	0	0.43506	0.016685	0.076164	1	1217	3	0.43506
Serinc2	4	0.62154	0.59092	0.881311	13762	2	0.54785	0.016691	0.076164	1	1218	2	0.54785
D6Ertd527e	4	0.95511	0.89657	1	18284	0	0.94923	0.016701	0.076164	1	1219	3	0.94923
Gabrq	4	0.45947	0.43349	0.790892	11287	2	-0.37308	0.016736	0.076164	1	1220	1	-0.37308
Nmnat2	4	0.63851	0.60761	0.888573	14070	2	0.8467	0.016752	0.076164	1	1221	2	0.8467
Cdo1	4	0.41553	0.40084	0.771692	10684	1	0.3419	0.016787	0.076164	1	1222	2	0.3419
Fip1l1	4	0.29123	0.31255	0.710226	8991	2	-0.97409	0.016837	0.076164	1	1223	1	-0.97409
Ndrg4	4	0.074281	0.074503	0.383562	3971	1	1.1022	0.016843	0.076164	1	1224	3	1.1022
Cdc25c	4	0.57076	0.53447	0.850988	12903	1	1.2001	0.01685	0.076164	1	1225	3	1.2001
Proz	4	0.72815	0.67608	0.922837	15063	1	1.073	0.016894	0.076164	1	1226	3	1.073
Vmn1r221	4	0.96462	0.91321	1	18546	0	1.1271	0.016898	0.076164	1	1227	3	1.1271
Vkorc1	4	0.87582	0.78264	0.965781	16694	1	0.85446	0.016903	0.076164	1	1228	2	0.85446
1700016K19Rik	4	0.30972	0.32399	0.715721	9247	2	-0.32653	0.016939	0.076164	1	1229	2	-0.32653
Ssxb10	4	0.31677	0.32918	0.719644	9345	1	1.2745	0.016941	0.076164	1	1230	3	1.2745
4430402I18Rik	4	0.64464	0.61593	0.890562	14191	2	-0.43223	0.017041	0.076164	1	1231	1	-0.43223
Ces2c	4	0.56462	0.52687	0.845594	12822	1	0.93318	0.017078	0.076567	1	1232	3	0.93318
Smarca4	3	0.083224	0.097587	0.461602	4181	2	-2.8925	0.017123	0.055863	1	1233	1	-2.8925
Fbln2	4	0.24309	0.25536	0.667289	7855	1	0.062111	0.017142	0.076568	1	1234	2	0.062111
Arhgef39	4	0.5197	0.48441	0.820263	12155	2	-0.32839	0.017193	0.076973	1	1235	1	-0.32839
Apc	4	0.93307	0.86455	1	17791	0	0.86158	0.0172	0.076973	1	1236	3	0.86158
Wipi1	4	0.20318	0.21046	0.624106	6929	2	0.32156	0.017223	0.076973	1	1237	2	0.32156
Tceal1	4	0.95374	0.89582	1	18245	0	0.66758	0.017244	0.076973	1	1238	2	0.66758
Nlrp9c	4	0.97231	0.93118	1	18758	0	1.0453	0.017263	0.076974	1	1239	3	1.0453
Fastkd5	4	0.042147	0.041955	0.28552	3001	3	-4.1988	0.017294	0.076974	1	1240	1	-4.1988
Hspa1a	3	0.89497	0.80858	0.976817	17001	0	0.27863	0.017313	0.056521	1	1241	1	0.27863
Scaper	4	0.64672	0.61791	0.890562	14231	1	1.0781	0.017345	0.077277	1	1242	3	1.0781
Bgn	4	0.67569	0.64529	0.90561	14651	1	0.65444	0.017346	0.077277	1	1243	2	0.65444
Ammecr1	4	0.48203	0.45399	0.803431	11634	1	1.1879	0.017375	0.077577	1	1244	3	1.1879
Olfr474	4	0.8968	0.80692	0.976817	17044	1	1.1671	0.017392	0.077577	1	1245	2	1.1671
Gm694	3	0.39954	0.37118	0.753168	10469	2	-0.53383	0.017428	0.056827	1	1246	1	-0.53383
Mettl21e	4	0.6782	0.64624	0.906451	14669	1	1.0888	0.017435	0.077578	1	1247	3	1.0888
Gabrb2	4	0.046698	0.045895	0.294631	3188	3	-1.5014	0.017447	0.077578	1	1248	1	-1.5014
Olfr1501	4	0.47655	0.44698	0.797252	11549	1	0.90935	0.01745	0.077578	1	1249	3	0.90935
Zfp819	4	0.96101	0.90654	1	18457	0	1.1952	0.017454	0.077578	1	1250	3	1.1952
Chrna2	4	0.75813	0.69286	0.93072	15332	1	0.1575	0.017497	0.077578	1	1251	2	0.1575
Cav3	4	0.80352	0.72091	0.941548	15776	1	0.82091	0.01754	0.077879	1	1252	3	0.82091
Cd163l1	4	0.67254	0.64529	0.90561	14620	1	1.257	0.017551	0.077879	1	1253	3	1.257
Bmp7	4	0.96683	0.91894	1	18613	0	0.7421	0.017577	0.077879	1	1254	3	0.7421
Arhgef33	4	0.18061	0.18732	0.599759	6400	3	-1.1247	0.017599	0.077879	1	1255	1	-1.1247
Efna2	4	0.7699	0.70032	0.932472	15463	1	0.52192	0.0177	0.078329	1	1256	2	0.52192
Mgl2	4	0.97047	0.92608	1	18702	0	0.87336	0.017705	0.078329	1	1257	3	0.87336
Hspb3	4	0.25359	0.26996	0.679237	8116	2	0.42951	0.017724	0.078329	1	1258	2	0.42951
Insm2	4	0.73736	0.68165	0.925816	15150	1	1.1444	0.017728	0.078329	1	1259	3	1.1444
Zdhhc12	4	0.14183	0.14739	0.542112	5529	3	-1.3532	0.017751	0.078329	1	1260	1	-1.3532
Hsd3b3	4	0.29039	0.3118	0.709764	8968	1	0.68127	0.017763	0.078329	1	1261	2	0.68127
Olfr1009	4	0.84842	0.75559	0.955629	16310	1	0.88769	0.017766	0.078329	1	1262	3	0.88769
Tnfrsf13c	4	0.94326	0.88015	1	18016	0	0.99318	0.017785	0.078329	1	1263	3	0.99318
Mnda	4	0.32664	0.33667	0.726935	9482	2	-0.10614	0.017802	0.078329	1	1264	2	-0.10614
Ccdc92	4	0.10208	0.11597	0.507606	4643	2	0.21454	0.017817	0.078329	1	1265	2	0.21454
Usp10	4	0.95522	0.89657	1	18288	0	1.0976	0.017833	0.078329	1	1266	2	1.0976
Slc2a9	3	0.69142	0.5936	0.882339	14751	1	0.24367	0.017847	0.057778	1	1267	2	0.24367
Tas1r3	4	0.83225	0.74347	0.950082	16100	1	0.7681	0.01788	0.078934	1	1268	2	0.7681
Rragc	4	0.95771	0.90024	1	18351	0	1.1337	0.017899	0.078934	1	1269	3	1.1337
Nelfcd	4	0.19403	0.19857	0.605616	6713	2	-0.50116	0.017903	0.078934	1	1270	2	-0.50116
Sprr4	4	0.96784	0.92014	1	18636	0	0.77951	0.017925	0.078934	1	1271	3	0.77951
Fndc3a	4	0.73742	0.68165	0.925816	15151	1	0.87035	0.017937	0.078934	1	1272	3	0.87035
Dao	4	0.66076	0.63408	0.90177	14468	1	0.48885	0.017954	0.078934	1	1273	3	0.48885
Vmn1r63	4	0.70535	0.66394	0.918292	14879	1	1.1051	0.017971	0.078934	1	1274	3	1.1051
Ppif	4	0.13333	0.14393	0.542112	5350	1	0.74918	0.017973	0.078934	1	1275	2	0.74918
Actn2	4	0.92794	0.85162	0.995047	17657	1	0.96749	0.017979	0.078934	1	1276	3	0.96749
Rhox1	4	0.60598	0.56659	0.863205	13498	2	-0.14052	0.018005	0.078935	1	1277	1	-0.14052
Atp6v0c	1	0.98192	0.98471	1	19024	0	5.4627	0.018083	0.015291	0.744752	1278	1	5.4627
Zfp781	4	0.85606	0.76314	0.9586	16424	1	0.6478	0.018083	0.078935	1	1279	2	0.6478
Zeb1	4	0.93809	0.87166	1	17910	0	0.87559	0.018097	0.078935	1	1280	3	0.87559
Sgsm1	4	0.91262	0.83116	0.988659	17337	1	0.42781	0.018106	0.079347	1	1281	3	0.42781
Bckdha	4	0.93271	0.86455	1	17785	0	0.98315	0.018116	0.079347	1	1282	3	0.98315
Aim2	4	0.71939	0.67238	0.922837	14988	1	0.20064	0.018157	0.079776	1	1283	2	0.20064
Rab12	4	0.62447	0.59197	0.881311	13804	2	0.66724	0.018161	0.079776	1	1284	2	0.66724
Hpx	4	0.89413	0.80322	0.975383	16990	1	0.8657	0.018162	0.079776	1	1285	3	0.8657
Pcdhga2	4	0.5592	0.5189	0.839387	12731	2	0.54808	0.018208	0.079777	1	1286	2	0.54808
Gas6	4	0.62924	0.59716	0.883583	13890	2	0.75145	0.018224	0.079777	1	1287	2	0.75145
Clec4a4	4	0.9682	0.92074	1	18646	0	1.0076	0.018258	0.080083	1	1288	3	1.0076
Zzef1	4	0.97357	0.93653	1	18783	0	0.96608	0.018258	0.080083	1	1289	3	0.96608
9130204L05Rik	4	0.22333	0.23443	0.648021	7391	1	0.75965	0.018281	0.080084	1	1290	3	0.75965
Rnf186	4	0.91455	0.83302	0.988938	17373	1	0.95816	0.018302	0.080401	1	1291	3	0.95816
Rspo4	4	0.82678	0.74068	0.950082	16023	1	0.8932	0.018316	0.080401	1	1292	3	0.8932
Rgs7bp	4	0.35977	0.36205	0.745813	9956	2	0.57277	0.018326	0.080402	1	1293	2	0.57277
Sigirr	4	0.25587	0.27063	0.679237	8162	2	-0.26382	0.01836	0.080848	1	1294	2	-0.26382
Haus1	4	0.11553	0.13192	0.536428	4966	2	-2.1477	0.018411	0.080848	1	1295	2	-2.1477
4930430A15Rik	4	0.67578	0.64529	0.90561	14653	1	0.956	0.018417	0.080848	1	1296	3	0.956
Cc2d1a	4	0.70771	0.66578	0.919111	14900	1	0.88477	0.018432	0.081166	1	1297	3	0.88477
Arhgef26	4	0.54014	0.50133	0.827443	12452	1	0.92399	0.018436	0.081166	1	1298	2	0.92399
Mpnd	4	0.65619	0.62914	0.897495	14398	1	1.0034	0.01844	0.081166	1	1299	3	1.0034
Olfr430	3	0.98153	0.96011	1	19016	0	0.64946	0.01847	0.060725	1	1300	3	0.64946
Bpifb2	4	0.97512	0.94283	1	18826	0	0.92867	0.018508	0.081622	1	1301	3	0.92867
4930523C07Rik	4	0.27156	0.28573	0.682929	8533	2	-0.51125	0.018512	0.081622	1	1302	2	-0.51125
Kcnip4	4	0.94669	0.88425	1	18098	0	0.98684	0.018517	0.081622	1	1303	3	0.98684
Otogl	4	0.82177	0.73881	0.950082	15972	1	0.92711	0.018525	0.081622	1	1304	3	0.92711
Anks6	4	0.67868	0.64624	0.906451	14671	1	1.0267	0.018539	0.081622	1	1305	3	1.0267
Rasd1	4	0.46728	0.44184	0.797252	11391	2	0.38995	0.018563	0.081622	1	1306	2	0.38995
Gpr179	4	0.98475	0.96377	1	19094	0	0.81471	0.018579	0.081622	1	1307	3	0.81471
Arhgap31	4	0.7104	0.6686	0.921034	14919	1	1.0204	0.01858	0.081622	1	1308	3	1.0204
Gm12695	4	0.88673	0.79198	0.968698	16867	1	0.92646	0.018584	0.081622	1	1309	3	0.92646
Rnf208	4	0.96985	0.92429	1	18687	0	1.0722	0.018587	0.081622	1	1310	3	1.0722
Dlgap3	4	0.66685	0.64439	0.90561	14580	1	1.0963	0.018603	0.081622	1	1311	3	1.0963
Ythdf3	4	0.52113	0.48575	0.82152	12176	1	0.39709	0.018613	0.081622	1	1312	2	0.39709
Klc4	4	0.17512	0.18485	0.598876	6269	1	0.93484	0.018619	0.081622	1	1313	3	0.93484
Ppp1r3d	4	0.95952	0.9031	1	18409	0	1.0455	0.018638	0.081622	1	1314	3	1.0455
Rcsd1	4	0.00094962	0.00024833	0.010689	474	3	-2.4736	0.018715	0.081622	1	1315	1	-2.4736
Dcaf17	4	0.14337	0.14779	0.542112	5560	2	-0.38002	0.018746	0.081623	1	1316	2	-0.38002
Fgf21	4	0.61528	0.58458	0.878958	13658	1	0.51788	0.018765	0.081623	1	1317	2	0.51788
Rbm47	4	0.28822	0.30767	0.704963	8920	3	-0.35183	0.018816	0.081623	1	1318	1	-0.35183
Sfmbt1	4	0.98312	0.96064	1	19052	0	1.2463	0.018817	0.081623	1	1319	3	1.2463
Plb1	4	0.53997	0.50133	0.827443	12446	1	0.78209	0.018842	0.081623	1	1320	3	0.78209
Nlrp4f	4	0.82084	0.73599	0.950082	15963	1	1.1428	0.018849	0.081623	1	1321	3	1.1428
Rce1	4	0.31553	0.32918	0.719644	9325	1	0.48207	0.018867	0.081623	1	1322	2	0.48207
Lyzl1	3	0.65971	0.57083	0.86744	14452	1	0.69299	0.018875	0.061061	1	1323	2	0.69299
Olfr920	4	0.88799	0.79385	0.970126	16891	1	1.1497	0.018881	0.081623	1	1324	3	1.1497
Olfr97	4	0.16939	0.18092	0.598876	6129	1	0.33335	0.018968	0.081623	1	1325	2	0.33335
Lsm1	4	0.97594	0.94469	1	18851	0	1.0154	0.019007	0.08194	1	1326	3	1.0154
Olfr599	4	0.80265	0.71996	0.940776	15771	1	1.1303	0.019019	0.082271	1	1327	3	1.1303
Lnpep	4	0.1666	0.17992	0.598876	6076	2	-0.24604	0.019019	0.082271	1	1328	2	-0.24604
Prelid2	4	0.082745	0.084785	0.418414	4168	1	0.86207	0.019058	0.082271	1	1329	3	0.86207
Fbxo4	4	0.83441	0.74347	0.950082	16126	1	0.89446	0.019078	0.082271	1	1330	3	0.89446
Khdrbs2	4	0.48256	0.45487	0.803431	11650	1	0.92405	0.01912	0.082272	1	1331	3	0.92405
Cacng6	4	0.57492	0.53671	0.850988	12971	1	0.87906	0.01913	0.082272	1	1332	3	0.87906
Zfp521	4	0.95479	0.89657	1	18275	0	0.82337	0.019169	0.082705	1	1333	3	0.82337
Mtfp1	4	0.5818	0.54641	0.857416	13077	1	0.59343	0.01917	0.082705	1	1334	2	0.59343
Fam168a	4	0.9824	0.95848	1	19036	0	1.0214	0.019218	0.082705	1	1335	3	1.0214
Acot1	4	0.093705	0.10849	0.497863	4426	3	-1.4529	0.019222	0.082705	1	1336	1	-1.4529
Snca	4	0.93186	0.86278	1	17763	0	0.88681	0.019253	0.082705	1	1337	3	0.88681
Adgrl4	4	0.79922	0.71814	0.94031	15737	1	1.1671	0.019265	0.082705	1	1338	3	1.1671
Upf3a	4	0.58028	0.54446	0.857416	13055	2	0.21032	0.019272	0.082705	1	1339	2	0.21032
Itgax	4	0.92564	0.84883	0.994711	17609	1	1.0128	0.019336	0.082705	1	1340	3	1.0128
Bmp3	4	0.69506	0.65556	0.912273	14786	1	0.80591	0.019352	0.082705	1	1341	3	0.80591
Clec2e	4	0.87247	0.77613	0.962982	16634	1	0.76572	0.019372	0.082705	1	1342	3	0.76572
Ccdc42b	4	0.95537	0.89731	1	18292	0	1.3096	0.019404	0.082705	1	1343	3	1.3096
Gas2l2	4	0.75096	0.68912	0.929071	15264	1	1.1259	0.019432	0.082705	1	1344	3	1.1259
Loxl1	4	0.21161	0.22351	0.640123	7130	2	-0.084778	0.019475	0.082705	1	1345	2	-0.084778
Mctp1	4	0.54409	0.50357	0.829417	12516	2	0.60775	0.019484	0.082705	1	1346	2	0.60775
Sh2d4a	4	0.16216	0.17136	0.583919	5990	1	0.72423	0.019517	0.082705	1	1347	2	0.72423
Hebp2	4	0.70808	0.66578	0.919111	14903	1	0.38284	0.019526	0.082705	1	1348	3	0.38284
Tbpl2	4	0.16997	0.18138	0.598876	6146	2	0.44583	0.019557	0.082705	1	1349	2	0.44583
Man1a	4	0.64265	0.61593	0.890562	14149	1	0.29591	0.019576	0.082705	1	1350	2	0.29591
Esp1	4	0.9723	0.93118	1	18757	0	1.3018	0.019577	0.082705	1	1351	3	1.3018
Olfr1499	4	0.505	0.47211	0.812628	11972	1	1.0779	0.019589	0.082705	1	1352	3	1.0779
Fam159b	4	0.17563	0.18534	0.598876	6286	1	0.89447	0.019627	0.082705	1	1353	2	0.89447
Nckap5l	4	0.65932	0.63211	0.900592	14445	1	0.4071	0.019678	0.082705	1	1354	3	0.4071
Rrnad1	3	0.98031	0.95939	1	18987	0	1.1361	0.019687	0.061396	1	1355	3	1.1361
Olfr1193	3	0.98026	0.95903	1	18986	0	0.48429	0.019743	0.061721	1	1356	3	0.48429
BC061237	4	0.13162	0.14302	0.542112	5313	2	-2.6477	0.019779	0.082705	1	1357	1	-2.6477
Scg5	4	0.52504	0.48938	0.822756	12227	2	0.24109	0.019826	0.082705	1	1358	2	0.24109
Sdsl	4	0.88736	0.79385	0.970126	16882	1	0.7644	0.01983	0.082705	1	1359	2	0.7644
Ppp1r14d	4	0.9253	0.84883	0.994711	17598	1	1.1655	0.019834	0.082705	1	1360	3	1.1655
Khsrp	4	0.87401	0.77704	0.962982	16654	1	0.89755	0.019835	0.082705	1	1361	3	0.89755
Pcdh8	4	0.053185	0.054833	0.323508	3419	1	0.71377	0.019858	0.082705	1	1362	2	0.71377
Unc5c	4	0.90318	0.81259	0.976817	17167	1	0.88543	0.01988	0.082706	1	1363	3	0.88543
Clec4f	4	0.90677	0.81819	0.979334	17236	1	0.34059	0.01988	0.082706	1	1364	3	0.34059
Alkbh8	4	0.93811	0.87166	1	17911	0	1.1551	0.019916	0.082706	1	1365	3	1.1551
Fbp1	4	0.90625	0.81636	0.97777	17228	1	0.78469	0.019932	0.082706	1	1366	3	0.78469
Phactr3	4	0.72656	0.67608	0.922837	15052	1	0.96415	0.019982	0.082706	1	1367	3	0.96415
Wnt1	4	0.92379	0.846	0.993541	17566	1	1.1349	0.01999	0.082706	1	1368	3	1.1349
Olfr1497	4	0.94528	0.88263	1	18066	0	0.79715	0.019998	0.082706	1	1369	3	0.79715
Slc38a5	4	0.81506	0.72938	0.945545	15897	1	0.91534	0.02001	0.082706	1	1370	3	0.91534
Mctp2	4	0.79	0.71434	0.938179	15646	1	0.020375	0.020032	0.082706	1	1371	2	0.020375
Adprm	4	0.5999	0.56244	0.861731	13391	1	0.74072	0.020141	0.082706	1	1372	3	0.74072
Actg1	4	0.8561	0.76314	0.9586	16425	1	1.5333	0.020149	0.082706	1	1373	3	1.5333
Fahd2a	4	0.22617	0.23623	0.648021	7447	1	0.84028	0.020215	0.082706	1	1374	3	0.84028
Bhlhe23	4	0.070716	0.072928	0.382431	3895	2	-0.48458	0.020235	0.082706	1	1375	2	-0.48458
Nudt1	4	0.28476	0.30164	0.694626	8835	2	0.37972	0.020236	0.082706	1	1376	2	0.37972
Slc6a13	4	0.90537	0.81636	0.97777	17206	1	0.78798	0.020276	0.082706	1	1377	3	0.78798
Gm17359	4	0.62486	0.59197	0.881311	13811	1	0.39734	0.020286	0.082706	1	1378	2	0.39734
Pcgf5	4	0.973	0.93497	1	18773	0	0.75691	0.02042	0.082706	1	1379	3	0.75691
Ern1	4	0.39113	0.38557	0.761586	10355	1	0.40383	0.020437	0.082706	1	1380	3	0.40383
Slc39a13	4	0.93383	0.86455	1	17812	0	1.2492	0.020503	0.082706	1	1381	3	1.2492
Stau1	4	0.94691	0.88425	1	18101	0	0.47617	0.020539	0.082706	1	1382	2	0.47617
Klk1b4	4	0.51437	0.4776	0.813674	12088	1	0.8572	0.020542	0.082706	1	1383	2	0.8572
Tm2d2	4	0.2695	0.28436	0.682929	8484	3	-0.60619	0.020589	0.083168	1	1384	1	-0.60619
C130060K24Rik	4	0.95816	0.90024	1	18363	0	0.86754	0.020644	0.083168	1	1385	3	0.86754
Olfr360	4	0.85021	0.75745	0.956452	16332	1	1.0076	0.020648	0.083168	1	1386	3	1.0076
Usf2	4	0.95427	0.89582	1	18258	0	0.82125	0.020661	0.083168	1	1387	3	0.82125
Gpr83	4	0.90476	0.81636	0.97777	17193	1	0.78698	0.020686	0.083168	1	1388	3	0.78698
Csl	4	0.51604	0.47894	0.814344	12113	2	-0.39519	0.020691	0.083168	1	1389	1	-0.39519
Bnip3l	4	0.48854	0.4575	0.803978	11737	2	0.40925	0.020691	0.083168	1	1390	2	0.40925
Cyp19a1	4	0.022512	0.018283	0.176655	2082	1	0.6227	0.020708	0.083168	1	1391	2	0.6227
Olfr596	4	0.55835	0.51761	0.837699	12722	2	0.53809	0.020725	0.083168	1	1392	2	0.53809
9130008F23Rik	4	0.3917	0.38557	0.761586	10363	2	-0.32956	0.020741	0.083168	1	1393	2	-0.32956
Nmur2	4	0.96715	0.91894	1	18620	0	1.0812	0.020757	0.083168	1	1394	3	1.0812
Olfr384	4	0.31577	0.32918	0.719644	9329	2	0.14183	0.020791	0.083168	1	1395	2	0.14183
Tex13	4	0.63723	0.60447	0.885225	14052	2	0.40194	0.020792	0.083168	1	1396	2	0.40194
Raet1e	4	0.29969	0.31772	0.713264	9106	1	0.61182	0.0208	0.083168	1	1397	2	0.61182
Amn1	4	0.17263	0.18393	0.598876	6210	2	0.079793	0.020843	0.083168	1	1398	2	0.079793
Pacrg	4	0.58455	0.54845	0.857416	13125	1	0.97893	0.020866	0.083625	1	1399	3	0.97893
Olfr2	4	0.93096	0.86099	1	17740	0	1.0606	0.020891	0.083626	1	1400	3	1.0606
Defb48	4	0.81602	0.73034	0.946554	15909	1	0.71279	0.020917	0.083924	1	1401	3	0.71279
Lrrc8d	4	0.74344	0.68441	0.925816	15210	1	1.0029	0.020928	0.083924	1	1402	3	1.0029
Vash1	4	0.83259	0.74347	0.950082	16103	1	0.60253	0.020958	0.083924	1	1403	2	0.60253
Lrrtm4	4	0.071463	0.073153	0.382431	3913	1	0.41709	0.020994	0.084395	1	1404	2	0.41709
Gm5464	4	0.77147	0.70032	0.932472	15474	1	1.1434	0.021017	0.084395	1	1405	3	1.1434
A530016L24Rik	4	0.47178	0.44524	0.797252	11462	1	0.92979	0.021025	0.084395	1	1406	2	0.92979
Nup93	3	0.10751	0.1198	0.517509	4785	2	-4.6737	0.021083	0.071294	1	1407	1	-4.6737
Igf2r	4	0.66086	0.63408	0.90177	14471	2	-0.11387	0.021096	0.084395	1	1408	1	-0.11387
Tesk2	4	0.022107	0.018193	0.176655	2052	2	-0.29604	0.021146	0.084395	1	1409	1	-0.29604
Fam63b	4	0.26639	0.28032	0.681839	8400	2	0.3954	0.02116	0.084395	1	1410	2	0.3954
Btbd17	4	0.77272	0.70126	0.932472	15490	1	0.88821	0.021172	0.084712	1	1411	3	0.88821
Nim1k	3	0.67314	0.58	0.876269	14624	1	-0.22234	0.021197	0.071614	1	1412	1	-0.22234
Nrsn2	4	0.92693	0.85162	0.995047	17632	1	0.23625	0.021197	0.084712	1	1413	2	0.23625
Rbpms2	4	0.87573	0.78264	0.965781	16690	1	0.0045994	0.021247	0.084712	1	1414	1	0.0045994
Plce1	4	0.45332	0.43115	0.790892	11188	1	0.8855	0.021253	0.084712	1	1415	3	0.8855
Olfr293	4	0.19862	0.20287	0.611077	6820	2	-0.77557	0.021298	0.084712	1	1416	1	-0.77557
Zfp109	4	0.61337	0.58028	0.876424	13627	2	0.28011	0.021349	0.084712	1	1417	2	0.28011
Olfr781	4	0.96467	0.91321	1	18547	0	1.0147	0.02137	0.084712	1	1418	3	1.0147
Wwtr1	4	0.5872	0.54845	0.857416	13175	2	0.36066	0.021399	0.084712	1	1419	2	0.36066
Tmem25	4	0.8688	0.77335	0.961702	16595	1	0.58428	0.021438	0.084712	1	1420	2	0.58428
Ints3	2	0.32633	0.27284	0.679865	9475	1	-0.32573	0.021444	0.050983	1	1421	1	-0.32573
Ccdc27	4	0.97177	0.92897	1	18740	0	0.51494	0.02145	0.084712	1	1422	3	0.51494
Padi3	4	0.48791	0.45749	0.803978	11729	2	0.41665	0.02148	0.08506	1	1423	2	0.41665
Tspyl1	4	0.66838	0.64439	0.90561	14590	1	0.68536	0.0215	0.08506	1	1424	3	0.68536
Gpr108	4	0.88629	0.79198	0.968698	16858	1	0.75482	0.021514	0.085389	1	1425	2	0.75482
Trpv2	4	0.88213	0.78645	0.966289	16791	1	0.84998	0.021574	0.085389	1	1426	2	0.84998
Aire	4	0.41614	0.40161	0.771692	10695	2	0.40246	0.021608	0.085389	1	1427	2	0.40246
Hexdc	4	0.21081	0.22351	0.640123	7105	2	0.21686	0.021642	0.085389	1	1428	2	0.21686
Olfr1465	4	0.11915	0.13311	0.537332	5040	2	0.24129	0.021667	0.085389	1	1429	2	0.24129
Car12	4	0.97808	0.95001	1	18920	0	0.88142	0.021683	0.085389	1	1430	3	0.88142
Kctd12	4	0.90491	0.81636	0.97777	17196	1	0.80954	0.021743	0.085389	1	1431	3	0.80954
Mageb3	4	0.39578	0.3872	0.761586	10415	2	0.25808	0.021753	0.085389	1	1432	2	0.25808
Pus10	4	0.53645	0.49782	0.826412	12396	1	1.2129	0.021764	0.085389	1	1433	3	1.2129
Olfr504	4	0.35483	0.35863	0.742779	9884	2	0.42327	0.021786	0.085389	1	1434	2	0.42327
Vmn1r199	4	0.97062	0.92608	1	18707	0	0.79487	0.021803	0.085389	1	1435	3	0.79487
Odf2l	4	0.0077962	0.0084861	0.134799	1246	3	-4.2306	0.021804	0.085389	1	1436	1	-4.2306
Hbb-bh1	4	0.52514	0.48938	0.822756	12231	1	0.89392	0.021863	0.085389	1	1437	3	0.89392
Samt2	4	0.97661	0.94693	1	18871	0	0.78587	0.021902	0.085389	1	1438	3	0.78587
Hsf5	4	0.87083	0.77519	0.962982	16615	1	0.99324	0.021907	0.085389	1	1439	3	0.99324
Rhou	3	0.97808	0.95536	1	18921	0	0.42425	0.021917	0.078191	1	1440	3	0.42425
Ppp2r5d	4	0.96073	0.90587	1	18448	0	1.0704	0.021958	0.085389	1	1441	3	1.0704
Zbtb6	4	0.4139	0.39923	0.77143	10660	1	0.90347	0.021984	0.085389	1	1442	3	0.90347
D330045A20Rik	4	0.54238	0.50133	0.827443	12487	2	0.62595	0.022	0.085389	1	1443	2	0.62595
Mpv17l	4	0.43592	0.4207	0.790892	10936	2	-0.15191	0.022006	0.085389	1	1444	1	-0.15191
Tdpoz5	4	0.034188	0.030262	0.230406	2658	2	0.48838	0.022034	0.085389	1	1445	2	0.48838
Pigl	4	0.96229	0.91055	1	18493	0	0.3167	0.022057	0.085389	1	1446	2	0.3167
Smek2	3	0.97791	0.95498	1	18914	0	0.68622	0.022093	0.078537	1	1447	3	0.68622
Oxct1	4	0.97041	0.92548	1	18699	0	1.0578	0.022136	0.085389	1	1448	3	1.0578
Bbc3	4	0.32651	0.33667	0.726935	9481	2	-0.02478	0.022158	0.085389	1	1449	2	-0.02478
Dennd6a	3	0.97784	0.95498	1	18913	0	0.64477	0.022163	0.078537	1	1450	3	0.64477
Lgsn	4	0.79526	0.71529	0.938179	15701	1	1.0168	0.022231	0.085389	1	1451	3	1.0168
Olfr1331	4	0.93318	0.86455	1	17795	0	0.049779	0.022259	0.085389	1	1452	2	0.049779
Cecr5	4	0.72404	0.67421	0.922837	15027	1	0.8134	0.022266	0.085389	1	1453	2	0.8134
Plekhh1	4	0.64628	0.61791	0.890562	14223	2	0.53844	0.022309	0.085389	1	1454	2	0.53844
Tpra1	4	0.31344	0.32716	0.719488	9293	2	-0.24087	0.02231	0.085389	1	1455	1	-0.24087
1700007G11Rik	4	0.98437	0.96275	1	19087	0	0.91155	0.02231	0.085389	1	1456	3	0.91155
Ifi30	4	0.66168	0.6372	0.903786	14491	1	0.69734	0.02236	0.085389	1	1457	3	0.69734
Sv2c	4	0.22162	0.23329	0.648021	7352	1	0.71518	0.02236	0.085389	1	1458	2	0.71518
Tmem88	4	0.44487	0.42798	0.790892	11050	1	0.83796	0.022389	0.085389	1	1459	3	0.83796
Rnf111	4	0.98346	0.96064	1	19064	0	0.9695	0.022406	0.085389	1	1460	3	0.9695
Kat2b	4	0.92567	0.84883	0.994711	17610	1	0.20718	0.022411	0.085389	1	1461	2	0.20718
Tlr9	3	0.29967	0.27837	0.680591	9105	2	-0.71982	0.022413	0.078538	1	1462	1	-0.71982
Pacs2	4	0.50446	0.47211	0.812628	11967	2	0.38784	0.022447	0.085389	1	1463	2	0.38784
Slc27a5	4	0.1042	0.12049	0.517509	4698	1	0.94166	0.022507	0.085722	1	1464	3	0.94166
Rinl	4	0.96287	0.91119	1	18503	0	1.0785	0.022511	0.085722	1	1465	3	1.0785
Cdk5	4	0.32209	0.33231	0.721677	9412	1	0.7583	0.02255	0.085722	1	1466	2	0.7583
Olfr459	4	0.21246	0.22409	0.640123	7143	3	-0.90306	0.022562	0.085722	1	1467	1	-0.90306
Olfr30	4	0.64613	0.61791	0.890562	14218	1	1.0063	0.022585	0.085722	1	1468	3	1.0063
Cdkn2d	4	0.83045	0.74165	0.950082	16078	1	0.74843	0.022595	0.085722	1	1469	3	0.74843
Olfr136	4	0.96143	0.9072	1	18469	0	0.68028	0.022599	0.085722	1	1470	3	0.68028
Hectd2	4	0.32996	0.34098	0.730627	9527	2	-0.32529	0.022613	0.085722	1	1471	2	-0.32529
Echdc2	4	0.43706	0.42397	0.790892	10956	1	0.9236	0.022621	0.085722	1	1472	3	0.9236
Col9a1	4	0.93585	0.86991	1	17853	0	1.0136	0.022637	0.085722	1	1473	3	1.0136
Pmm1	4	0.84604	0.75188	0.952798	16285	1	1.0503	0.022698	0.085722	1	1474	3	1.0503
Zcchc5	4	0.97571	0.94376	1	18843	0	0.75681	0.022714	0.085722	1	1475	3	0.75681
Rnf130	4	0.96677	0.91894	1	18612	0	0.85714	0.022714	0.085722	1	1476	3	0.85714
Olfr1535	3	0.97728	0.95498	1	18889	0	0.48003	0.022725	0.078538	1	1477	3	0.48003
Gm4847	4	0.71933	0.67238	0.922837	14987	1	0.90191	0.022767	0.085722	1	1478	3	0.90191
Rnf146	4	0.92858	0.85353	0.996598	17675	1	-0.0077486	0.022815	0.085722	1	1479	1	-0.0077486
Eid2	4	0.17901	0.18635	0.599363	6368	1	0.70301	0.022838	0.085722	1	1480	3	0.70301
Tmem242	4	0.38975	0.38314	0.761586	10346	2	0.5687	0.022854	0.085722	1	1481	2	0.5687
Slc38a9	4	0.75249	0.68912	0.929071	15276	1	1.0617	0.02286	0.085722	1	1482	3	1.0617
Ccdc90b	4	0.97547	0.94376	1	18836	0	1.0266	0.022866	0.085722	1	1483	3	1.0266
Rlf	4	0.93075	0.86008	1	17734	0	0.82812	0.022869	0.085722	1	1484	3	0.82812
Chrm1	4	0.59536	0.55614	0.859415	13314	1	0.76856	0.022873	0.085722	1	1485	3	0.76856
2010107G23Rik	4	0.96873	0.92196	1	18658	0	0.9656	0.02294	0.085722	1	1486	3	0.9656
Slc12a6	4	0.90546	0.81636	0.97777	17208	1	1.1552	0.022941	0.085722	1	1487	3	1.1552
Trim25	4	0.85261	0.7593	0.957213	16367	1	0.98729	0.022949	0.085722	1	1488	3	0.98729
Zfyve16	4	0.90399	0.81451	0.97777	17180	1	1.0797	0.022953	0.085722	1	1489	3	1.0797
Olfr309	4	0.076802	0.075779	0.386255	4031	2	-0.1974	0.022967	0.085722	1	1490	2	-0.1974
Opn3	4	0.94278	0.87852	1	18007	0	0.89783	0.022985	0.085722	1	1491	2	0.89783
Cbln1	4	0.97594	0.94469	1	18852	0	0.81625	0.022997	0.085722	1	1492	3	0.81625
Cd2	4	0.84749	0.75467	0.95505	16299	1	0.94314	0.023002	0.085722	1	1493	3	0.94314
Pard3	4	0.98418	0.96241	1	19082	0	1.0175	0.023046	0.085722	1	1494	3	1.0175
Vmn1r224	4	0.78021	0.7069	0.93574	15565	1	0.6349	0.023055	0.085722	1	1495	2	0.6349
Fry	4	0.97812	0.95001	1	18923	0	0.95872	0.023069	0.085722	1	1496	3	0.95872
Vmn1r28	3	0.85465	0.75369	0.954348	16399	1	1.4832	0.023109	0.078912	1	1497	2	1.4832
Nfe2	4	0.88656	0.79198	0.968698	16865	1	0.46767	0.023118	0.085722	1	1498	2	0.46767
Amy2a4	4	0.79108	0.71529	0.938179	15661	1	1.0368	0.023176	0.085722	1	1499	3	1.0368
Olfr1248	4	0.10263	0.11672	0.509924	4656	2	-0.15887	0.023256	0.086378	1	1500	2	-0.15887
Ralgds	4	0.97235	0.93118	1	18759	0	0.88174	0.023292	0.086378	1	1501	3	0.88174
Map7d1	4	0.11504	0.13112	0.536428	4956	1	0.38493	0.023321	0.086378	1	1502	2	0.38493
Jph3	4	0.97806	0.95001	1	18919	0	0.94954	0.023379	0.086725	1	1503	3	0.94954
Olfr198	4	0.9585	0.90095	1	18377	0	0.88813	0.023388	0.086725	1	1504	3	0.88813
1700020N15Rik	4	0.96291	0.91254	1	18506	0	0.80531	0.023418	0.086725	1	1505	3	0.80531
Minos1	4	0.0023173	0.00074355	0.021577	713	3	-6.6979	0.023422	0.086725	1	1506	1	-6.6979
Tcf25	4	0.9092	0.8228	0.983247	17271	1	0.7838	0.023427	0.086725	1	1507	3	0.7838
Sln	4	0.82926	0.74068	0.950082	16062	1	0.26516	0.023472	0.086725	1	1508	2	0.26516
Slc7a3	4	0.52477	0.48938	0.822756	12223	2	0.62544	0.023485	0.086725	1	1509	2	0.62544
Neu4	4	0.9267	0.85162	0.995047	17628	1	0.24666	0.023573	0.087541	1	1510	2	0.24666
Cyp8b1	4	0.30522	0.32333	0.715721	9180	1	1.0432	0.023576	0.087541	1	1511	3	1.0432
Slc25a34	4	0.89239	0.80226	0.975383	16969	1	0.586	0.023585	0.087541	1	1512	3	0.586
4930578I06Rik	4	0.92468	0.84695	0.993926	17584	1	0.93832	0.023617	0.087542	1	1513	2	0.93832
Tbc1d17	4	0.24532	0.26188	0.677865	7913	3	-0.49356	0.023624	0.087542	1	1514	1	-0.49356
Olfr746	4	0.63993	0.60972	0.890267	14093	1	0.90344	0.023684	0.087542	1	1515	3	0.90344
Ifit2	4	0.96365	0.91321	1	18523	0	0.92266	0.023706	0.088029	1	1516	3	0.92266
Olfr557	4	0.95075	0.89053	1	18175	0	1.0122	0.02372	0.088029	1	1517	3	1.0122
Clstn3	4	0.27421	0.2876	0.684756	8596	2	-0.0086793	0.023775	0.08803	1	1518	2	-0.0086793
Ncstn	4	0.97925	0.9526	1	18958	0	1.0536	0.023785	0.088396	1	1519	3	1.0536
Adam2	4	0.059242	0.0604	0.339393	3626	2	0.22043	0.023821	0.088396	1	1520	2	0.22043
2010005H15Rik	4	0.3965	0.3872	0.761586	10428	1	0.79839	0.023825	0.088396	1	1521	3	0.79839
Adamts5	4	0.9823	0.95848	1	19033	0	0.98377	0.023826	0.088396	1	1522	3	0.98377
Syt17	4	0.35412	0.35789	0.742779	9872	1	0.55234	0.023876	0.088396	1	1523	2	0.55234
Ap2b1	4	0.75864	0.69286	0.93072	15339	1	0.79154	0.023892	0.088396	1	1524	3	0.79154
Tas2r108	4	0.96133	0.90654	1	18464	0	1.4362	0.023898	0.088396	1	1525	3	1.4362
Arfgef1	4	0.95397	0.89582	1	18252	0	0.62257	0.023901	0.088396	1	1526	2	0.62257
Adgre1	4	0.29953	0.31772	0.713264	9102	1	0.63039	0.02391	0.088396	1	1527	2	0.63039
Serpini2	4	0.97673	0.94693	1	18873	0	0.87159	0.023911	0.088396	1	1528	3	0.87159
Ccdc160	4	0.97562	0.94376	1	18840	0	0.57766	0.023927	0.088396	1	1529	3	0.57766
Gspt1	4	0.51274	0.4767	0.813603	12071	1	1.1268	0.023977	0.088396	1	1530	3	1.1268
Rps5	3	0.46862	0.44749	0.798014	11418	1	1.1441	0.024083	0.082022	1	1531	2	1.1441
Rab33b	4	0.842	0.74908	0.952798	16218	1	0.73277	0.024122	0.088726	1	1532	3	0.73277
Rasgrp4	4	0.31761	0.32988	0.719644	9358	2	-0.3567	0.024129	0.088726	1	1533	2	-0.3567
Mmp20	4	0.96542	0.91705	1	18573	0	1.0163	0.024177	0.08918	1	1534	3	1.0163
Ang2	4	0.12378	0.13623	0.538581	5136	1	0.20194	0.024179	0.08918	1	1535	2	0.20194
Arhgef11	4	0.81859	0.73412	0.949476	15940	1	0.81363	0.0242	0.08918	1	1536	3	0.81363
Nudcd1	4	0.98567	0.96509	1	19116	0	0.98618	0.024266	0.089181	1	1537	3	0.98618
Olfr1277	4	0.91228	0.83116	0.988659	17331	1	0.83628	0.024338	0.089181	1	1538	3	0.83628
Trappc6a	4	0.61868	0.58777	0.880711	13724	2	-0.12779	0.024381	0.089539	1	1539	1	-0.12779
Dennd5b	4	0.66515	0.64239	0.90561	14553	1	1.0576	0.024393	0.089539	1	1540	3	1.0576
Cd209c	4	0.78619	0.70973	0.937024	15614	1	0.61142	0.024419	0.089539	1	1541	2	0.61142
Shisa3	4	0.74952	0.68911	0.929071	15255	1	0.85478	0.024432	0.089539	1	1542	3	0.85478
B930041F14Rik	4	0.18273	0.18944	0.599759	6450	2	0.43403	0.024481	0.089882	1	1543	2	0.43403
Psmc3ip	4	0.82139	0.73784	0.950082	15967	1	1.1927	0.02449	0.089882	1	1544	3	1.1927
Ing2	4	0.92652	0.85071	0.995047	17624	1	0.71537	0.024571	0.089882	1	1545	2	0.71537
Tmem203	4	0.93477	0.86817	1	17828	0	1.0824	0.024583	0.089882	1	1546	3	1.0824
Pcdh11x	4	0.31028	0.32399	0.715721	9251	2	-0.020614	0.024633	0.089882	1	1547	2	-0.020614
Olfr854	4	0.95887	0.90169	1	18388	0	0.77122	0.024634	0.089882	1	1548	3	0.77122
Lztfl1	4	0.93806	0.87166	1	17909	0	0.81878	0.024638	0.089882	1	1549	3	0.81878
Zswim6	4	0.9689	0.92196	1	18664	0	1.2238	0.024694	0.089882	1	1550	3	1.2238
Sla	4	0.21397	0.22409	0.640123	7177	1	0.26263	0.024734	0.089882	1	1551	2	0.26263
Zfp365	4	0.47942	0.44992	0.800475	11594	1	1.1253	0.024742	0.090238	1	1552	3	1.1253
Apof	4	0.1694	0.18092	0.598876	6130	2	-1.0707	0.024785	0.090238	1	1553	1	-1.0707
S100a13	4	0.93854	0.87166	1	17922	0	0.49306	0.024835	0.090238	1	1554	2	0.49306
Rhbdl2	4	0.64525	0.61593	0.890562	14201	2	0.48094	0.024878	0.090238	1	1555	2	0.48094
Ttc16	4	0.98376	0.96134	1	19071	0	0.84967	0.024913	0.090238	1	1556	3	0.84967
Tcf19	4	0.80253	0.71996	0.940776	15768	1	0.058863	0.024936	0.090238	1	1557	2	0.058863
Zbtb18	4	0.85816	0.76593	0.960217	16455	1	0.87483	0.024941	0.090238	1	1558	3	0.87483
Tnrc18	4	0.88441	0.79011	0.968698	16826	1	0.96472	0.024955	0.090238	1	1559	3	0.96472
Arl3	4	0.54864	0.5067	0.830928	12570	2	-0.2569	0.024987	0.090238	1	1560	1	-0.2569
Lrrc36	4	0.45276	0.43029	0.790892	11178	1	1.178	0.024993	0.090238	1	1561	3	1.178
Lrrc17	4	0.17292	0.18393	0.598876	6216	1	0.77511	0.025035	0.090238	1	1562	3	0.77511
Creld2	4	0.98142	0.95654	1	19013	0	0.9221	0.02505	0.090238	1	1563	2	0.9221
Abcg2	4	0.22411	0.23444	0.648021	7402	2	0.45236	0.025077	0.090239	1	1564	2	0.45236
Krt33b	4	0.53503	0.49782	0.826412	12377	1	0.73821	0.025086	0.090239	1	1565	3	0.73821
Slc25a13	4	0.53856	0.50004	0.827443	12432	2	0.32122	0.025114	0.090239	1	1566	2	0.32122
Gabbr2	4	0.1109	0.12913	0.536428	4862	2	-0.096463	0.025138	0.090239	1	1567	2	-0.096463
Klrg1	4	0.46612	0.44184	0.797252	11379	2	0.40432	0.025159	0.090239	1	1568	2	0.40432
Icam2	4	0.96776	0.92014	1	18635	0	0.75748	0.025177	0.090239	1	1569	2	0.75748
Abca8b	4	0.66511	0.64132	0.90561	14551	1	0.81105	0.025239	0.090239	1	1570	3	0.81105
Tnr	4	0.79743	0.71529	0.938179	15718	1	0.58479	0.025289	0.090239	1	1571	3	0.58479
Hdac10	4	0.86131	0.76775	0.960217	16486	1	0.90889	0.025294	0.090239	1	1572	3	0.90889
Fam174b	4	0.96516	0.9158	1	18564	0	0.91141	0.025305	0.090239	1	1573	3	0.91141
Dclk3	4	0.39608	0.3872	0.761586	10421	1	1.0078	0.025308	0.090239	1	1574	3	1.0078
Smpdl3a	4	0.23005	0.23806	0.648438	7547	2	-0.13413	0.02534	0.090239	1	1575	2	-0.13413
Zfp874b	4	0.54128	0.50133	0.827443	12471	2	0.63784	0.025396	0.090594	1	1576	2	0.63784
Fgf16	4	0.65345	0.62597	0.897495	14345	2	-0.25709	0.025441	0.090594	1	1577	1	-0.25709
Alkbh7	4	0.97831	0.95087	1	18931	0	1.1435	0.025442	0.090594	1	1578	3	1.1435
N4bp3	4	0.96613	0.91894	1	18591	0	0.79706	0.025478	0.090594	1	1579	3	0.79706
Nr3c2	4	0.39939	0.3872	0.761586	10468	2	-0.22847	0.025491	0.090594	1	1580	2	-0.22847
Cuzd1	4	0.95761	0.90024	1	18349	0	1.364	0.025542	0.090594	1	1581	3	1.364
Ifitm1	4	0.50908	0.47578	0.813603	12021	1	0.045138	0.025592	0.090594	1	1582	2	0.045138
Gm527	4	0.73349	0.68072	0.925816	15114	1	0.70278	0.025597	0.090594	1	1583	3	0.70278
Krt33a	4	0.23572	0.24521	0.656636	7670	3	-0.75267	0.025643	0.090594	1	1584	1	-0.75267
Nxpe4	4	0.060527	0.061407	0.343029	3652	2	0.039777	0.025735	0.090594	1	1585	2	0.039777
Ccer1	4	0.76313	0.69656	0.931762	15383	1	-0.10337	0.025743	0.090594	1	1586	1	-0.10337
Fkbp11	4	0.92834	0.85258	0.995607	17665	1	0.69569	0.025772	0.090594	1	1587	2	0.69569
Tcte1	4	0.93972	0.87252	1	17950	0	0.86727	0.025816	0.090594	1	1588	3	0.86727
Gnb1	4	0.84246	0.75091	0.952798	16224	1	0.87766	0.025827	0.090594	1	1589	2	0.87766
Polg	4	0.002108	0.00068356	0.02065	687	3	-2.4906	0.025844	0.091098	1	1590	1	-2.4906
Ank	4	0.66531	0.64239	0.90561	14558	1	1.0251	0.025849	0.091098	1	1591	3	1.0251
Eif4e3	4	0.76712	0.69843	0.931762	15423	1	0.84934	0.025891	0.091098	1	1592	2	0.84934
Map2k1	4	0.2562	0.27126	0.679865	8170	2	-0.56707	0.025895	0.091098	1	1593	2	-0.56707
Zmat3	4	0.61249	0.57711	0.87209	13610	2	0.62138	0.02591	0.091098	1	1594	2	0.62138
Upf3b	4	0.063826	0.063485	0.347914	3730	2	0.37787	0.025945	0.091098	1	1595	2	0.37787
Igsf3	4	0.46164	0.43433	0.791453	11311	1	0.76046	0.02596	0.091098	1	1596	3	0.76046
Dsn1	4	0.91774	0.83765	0.99095	17436	1	0.33689	0.026046	0.091098	1	1597	2	0.33689
Psmc4	2	0.83144	0.7333	0.948782	16088	0	2.9611	0.026093	0.060031	1	1598	1	2.9611
Apol11b	4	0.94642	0.88425	1	18090	0	0.69098	0.026147	0.091098	1	1599	2	0.69098
R3hdm4	4	0.26529	0.27892	0.681465	8378	1	0.91107	0.026176	0.091098	1	1600	3	0.91107
Mmp10	4	0.79455	0.71529	0.938179	15697	1	0.27706	0.026197	0.091098	1	1601	2	0.27706
Lonrf3	4	0.92019	0.84224	0.992856	17494	1	0.83023	0.026229	0.091098	1	1602	3	0.83023
Map3k7cl	4	0.92428	0.846	0.993541	17575	1	0.59419	0.026248	0.091098	1	1603	3	0.59419
Calm3	4	0.94454	0.881	1	18051	0	0.94476	0.026282	0.091098	1	1604	3	0.94476
Amy2a2	4	0.96894	0.92196	1	18665	0	0.90728	0.026311	0.093935	1	1605	3	0.90728
1700019G17Rik	4	0.5639	0.52592	0.845594	12807	2	0.37346	0.026381	0.096711	1	1606	2	0.37346
Ano9	4	0.81362	0.72842	0.945545	15878	1	0.77777	0.026389	0.096711	1	1607	3	0.77777
Lce1h	4	0.96669	0.91894	1	18610	0	0.29254	0.026399	0.096711	1	1608	2	0.29254
Btbd16	4	0.96094	0.90654	1	18454	0	1.0151	0.026403	0.096711	1	1609	3	1.0151
Plin2	4	0.45001	0.42798	0.790892	11125	2	-0.53648	0.026449	0.096712	1	1610	1	-0.53648
Scn7a	4	0.85191	0.7593	0.957213	16353	1	0.82646	0.026505	0.097054	1	1611	3	0.82646
Mapk12	4	0.018106	0.015464	0.168603	1857	2	0.40997	0.026558	0.097054	1	1612	2	0.40997
Stac3	4	0.27661	0.29158	0.687006	8648	2	0.44045	0.026651	0.097805	1	1613	2	0.44045
Kcne3	4	0.89018	0.79853	0.973477	16930	1	0.75561	0.026675	0.097805	1	1614	3	0.75561
Traf3ip2	4	0.9797	0.95339	1	18974	0	1.0384	0.026679	0.097805	1	1615	3	1.0384
Myh1	4	0.41047	0.39678	0.769356	10608	2	-0.36609	0.026701	0.097805	1	1616	1	-0.36609
Tex28	4	0.91807	0.83765	0.99095	17444	1	1.0665	0.026739	0.097805	1	1617	3	1.0665
Dmrtc2	4	0.69379	0.65556	0.912273	14772	1	0.91314	0.026791	0.097806	1	1618	3	0.91314
Cfi	4	0.53844	0.50004	0.827443	12430	1	0.81632	0.026793	0.097806	1	1619	3	0.81632
Sema4g	4	0.57068	0.53447	0.850988	12902	1	0.1455	0.026802	0.097806	1	1620	2	0.1455
Pah	4	0.91881	0.83955	0.991099	17464	1	1.3313	0.026802	0.097806	1	1621	3	1.3313
Vmn1r114	3	0.82621	0.71245	0.938179	16016	1	1.2234	0.026874	0.094843	1	1622	2	1.2234
Cfap36	4	0.85973	0.76775	0.960217	16474	1	0.99049	0.026881	0.097806	1	1623	3	0.99049
Vmn1r36	4	0.23341	0.24233	0.651971	7634	2	-0.53429	0.026903	0.097806	1	1624	2	-0.53429
Oasl2	4	0.93105	0.86099	1	17743	0	0.63897	0.026925	0.098242	1	1625	3	0.63897
Grxcr1	4	0.0098628	0.010206	0.146583	1386	1	0.64726	0.026941	0.098243	1	1626	2	0.64726
Map3k11	4	0.94341	0.88015	1	18019	0	0.97807	0.026945	0.098243	1	1627	3	0.97807
Tmsb15b1	3	0.97305	0.94601	1	18775	0	0.76401	0.026948	0.094843	1	1628	3	0.76401
Olfr1126	4	0.24559	0.26188	0.677865	7919	2	0.077182	0.026953	0.09862	1	1629	2	0.077182
Prl2a1	4	0.14656	0.15614	0.561921	5635	1	0.77016	0.026974	0.09862	1	1630	3	0.77016
Ptprz1	4	0.89606	0.80602	0.976376	17026	1	0.70482	0.026988	0.09862	1	1631	2	0.70482
8030462N17Rik	4	0.98203	0.9581	1	19029	0	0.83415	0.026989	0.09862	1	1632	3	0.83415
Hmgcs2	4	0.83694	0.7444	0.9505	16156	1	0.57345	0.027007	0.09862	1	1633	2	0.57345
Nfrkb	4	0.65323	0.62597	0.897495	14341	2	0.5123	0.027025	0.09862	1	1634	2	0.5123
Hs3st3b1	4	0.82303	0.73975	0.950082	15987	1	1.0237	0.027048	0.09862	1	1635	3	1.0237
Pfkp	4	0.039687	0.038951	0.272526	2905	2	-0.92628	0.027054	0.09862	1	1636	2	-0.92628
Cul4a	4	0.93479	0.86817	1	17829	0	1.0101	0.02711	0.09862	1	1637	3	1.0101
Neto2	4	0.97199	0.93007	1	18747	0	1.1083	0.027146	0.098992	1	1638	3	1.1083
Igbp1b	4	0.24725	0.26318	0.678268	7960	1	0.94722	0.027195	0.098993	1	1639	3	0.94722
Ppp1r3f	4	0.031831	0.028558	0.226977	2542	1	0.99937	0.027215	0.098993	1	1640	3	0.99937
Dhx57	4	0.97372	0.93653	1	18785	0	0.90504	0.027298	0.099367	1	1641	3	0.90504
Fam26d	4	0.74494	0.68441	0.925816	15224	1	0.66836	0.027306	0.099367	1	1642	3	0.66836
Dlx4	4	0.40194	0.3912	0.767338	10497	1	0.80158	0.027319	0.099367	1	1643	3	0.80158
Vmn1r193	4	0.92105	0.84414	0.993541	17513	1	0.90477	0.027327	0.099367	1	1644	2	0.90477
Ttc8	4	0.81722	0.73226	0.948148	15924	1	0.99002	0.027359	0.099367	1	1645	3	0.99002
Olfr857	4	0.97694	0.94693	1	18882	0	0.96165	0.027369	0.099367	1	1646	3	0.96165
Ccp110	4	0.44645	0.42798	0.790892	11077	2	0.52816	0.027402	0.099367	1	1647	2	0.52816
Bbs2	4	0.23235	0.2411	0.650874	7602	1	1.3141	0.027418	0.099367	1	1648	3	1.3141
Srebf2	4	0.18982	0.19647	0.605616	6596	2	-0.10241	0.027457	0.099367	1	1649	2	-0.10241
Ing3	4	0.085233	0.086348	0.418414	4234	3	-1.5063	0.027507	0.099368	1	1650	1	-1.5063
Ercc6	4	0.91871	0.83955	0.991099	17460	1	0.86625	0.027533	0.099368	1	1651	3	0.86625
Nufip2	4	0.94487	0.881	1	18058	0	0.95722	0.02761	0.099368	1	1652	3	0.95722
Gnb4	4	0.86505	0.77053	0.960217	16541	1	0.78627	0.027642	0.099368	1	1653	3	0.78627
Tbc1d22b	4	0.20723	0.21546	0.627993	7037	2	-0.56948	0.027658	0.099368	1	1654	1	-0.56948
Slc30a1	4	0.91659	0.8358	0.990125	17414	1	0.96036	0.027672	0.099368	1	1655	3	0.96036
Upb1	3	0.59953	0.52727	0.846162	13382	1	1.0877	0.027677	0.096351	1	1656	2	1.0877
Olfr215	4	0.92218	0.846	0.993541	17535	1	0.96992	0.027705	0.099368	1	1657	3	0.96992
Itgb1	4	0.94364	0.88015	1	18025	0	0.86439	0.027707	0.099368	1	1658	3	0.86439
1700016H13Rik	4	0.0538	0.055002	0.323508	3449	3	-1.6144	0.027709	0.099368	1	1659	1	-1.6144
Ppp2r5c	4	0.0039283	0.0023017	0.053431	895	3	-2.4656	0.027759	0.099742	1	1660	1	-2.4656
Prdm1	4	0.75067	0.68912	0.929071	15261	1	0.76727	0.027777	0.099742	1	1661	3	0.76727
Gria3	4	0.63486	0.60446	0.885225	14000	1	0.29202	0.027809	0.099742	1	1662	2	0.29202
Emid1	4	0.85523	0.76314	0.9586	16412	1	1.1336	0.027822	0.099742	1	1663	3	1.1336
Pddc1	4	0.27816	0.29228	0.687387	8687	2	-0.092566	0.02786	0.10013	1	1664	2	-0.092566
Sssca1	4	0.92168	0.846	0.993541	17526	1	0.43818	0.02791	0.10014	1	1665	3	0.43818
Smim1	4	0.83069	0.74165	0.950082	16083	1	0.71764	0.027917	0.10014	1	1666	3	0.71764
Suclg1	4	0.27999	0.293	0.687387	8722	1	0.57141	0.027924	0.10014	1	1667	2	0.57141
Olfr643	4	0.84134	0.74908	0.952798	16210	1	0.68428	0.027937	0.10053	1	1668	3	0.68428
Pld5	4	0.29094	0.31255	0.710226	8983	1	0.79146	0.027947	0.10053	1	1669	3	0.79146
Nceh1	4	0.94024	0.87253	1	17965	0	0.7052	0.02796	0.10053	1	1670	3	0.7052
Fabp7	4	0.7887	0.71248	0.938179	15638	1	0.6113	0.027971	0.10053	1	1671	2	0.6113
Hnrnpa0	4	0.78859	0.71248	0.938179	15635	1	0.032338	0.028061	0.10092	1	1672	2	0.032338
Chek2	4	0.9834	0.96064	1	19062	0	0.87203	0.028076	0.10092	1	1673	3	0.87203
Ccdc167	4	0.97608	0.94603	1	18855	0	0.91244	0.028086	0.10092	1	1674	3	0.91244
Krtap27-1	4	0.9514	0.89206	1	18191	0	0.82263	0.028108	0.10092	1	1675	3	0.82263
Itpr1	4	0.78418	0.70879	0.936806	15596	1	0.28989	0.028111	0.10092	1	1676	2	0.28989
Cyb561d2	4	0.51457	0.4776	0.813674	12092	2	0.38761	0.028114	0.10092	1	1677	2	0.38761
H2-M10.4	4	0.92218	0.846	0.993541	17534	1	0.94569	0.028143	0.10092	1	1678	3	0.94569
Ugt1a2	4	0.84903	0.75652	0.956452	16320	1	0.88143	0.028153	0.10092	1	1679	3	0.88143
Atcay	4	0.95513	0.89657	1	18286	0	0.91714	0.028174	0.10092	1	1680	3	0.91714
Uhrf1	4	0.1011	0.11492	0.505769	4623	3	-3.3043	0.028212	0.10092	1	1681	1	-3.3043
Olfr699	4	0.98312	0.96064	1	19051	0	0.78709	0.02825	0.10092	1	1682	3	0.78709
Map3k5	4	0.93918	0.87252	1	17940	0	0.93569	0.028258	0.10092	1	1683	3	0.93569
Tsga13	4	0.086066	0.086622	0.419255	4261	2	-0.15868	0.028262	0.10092	1	1684	1	-0.15868
Ola1	4	0.85858	0.76687	0.960217	16462	1	1.0412	0.028335	0.10092	1	1685	3	1.0412
1700034O15Rik	4	0.9273	0.85162	0.995047	17639	1	0.12723	0.028464	0.1046	1	1686	2	0.12723
Tmed8	4	0.70706	0.66578	0.919111	14895	1	0.45468	0.028469	0.1046	1	1687	2	0.45468
Olfr1308	4	0.97753	0.94915	1	18895	0	0.74833	0.028544	0.10497	1	1688	3	0.74833
Ell3	4	0.66113	0.63513	0.902271	14478	1	-0.081094	0.028564	0.10497	1	1689	1	-0.081094
Gpatch11	4	0.92695	0.85162	0.995047	17634	1	1.2012	0.028594	0.10497	1	1690	3	1.2012
Gmpr2	4	0.9802	0.95498	1	18982	0	0.93149	0.028613	0.10497	1	1691	2	0.93149
Fchsd2	4	0.84671	0.75281	0.953566	16291	1	0.57578	0.028766	0.10497	1	1692	3	0.57578
Sox15	4	0.2397	0.25226	0.666255	7769	1	1.3706	0.028788	0.10497	1	1693	3	1.3706
Actr8	4	0.46017	0.43349	0.790892	11294	1	1.2697	0.028819	0.10535	1	1694	3	1.2697
Ugt1a9	4	0.070278	0.072506	0.382431	3880	2	-1.0703	0.028866	0.10535	1	1695	1	-1.0703
Pp2d1	4	0.94832	0.88589	1	18131	0	0.81318	0.028881	0.10535	1	1696	3	0.81318
Defb29	4	0.15554	0.16422	0.573621	5841	2	0.042235	0.028912	0.10535	1	1697	2	0.042235
Scube2	4	0.87919	0.78457	0.966279	16749	1	0.31217	0.028917	0.10535	1	1698	2	0.31217
4-Mar	4	0.6052	0.5656	0.863035	13480	2	0.13019	0.028967	0.10535	1	1699	2	0.13019
Hrg	4	0.91511	0.83395	0.989306	17388	1	0.81153	0.028968	0.10535	1	1700	3	0.81153
Dapk3	4	0.85357	0.76028	0.957915	16379	1	0.95855	0.029009	0.10535	1	1701	3	0.95855
Tmem169	4	0.87183	0.77613	0.962982	16627	1	0.7441	0.029045	0.1081	1	1702	3	0.7441
Olfr1196	4	0.33974	0.34515	0.730627	9668	2	0.29078	0.029058	0.1081	1	1703	2	0.29078
Sirt2	4	0.24491	0.26124	0.677744	7901	2	-0.20306	0.029118	0.1081	1	1704	2	-0.20306
Schip1	4	0.32481	0.33476	0.72401	9456	1	1.0664	0.029203	0.1081	1	1705	3	1.0664
3110062M04Rik	4	0.79758	0.71621	0.938735	15720	1	0.89308	0.029223	0.1081	1	1706	3	0.89308
Eif5	2	0.97076	0.95153	1	18714	0	1.4733	0.029236	0.067384	1	1707	2	1.4733
Trak1	4	0.28328	0.29841	0.692737	8808	2	-0.10937	0.029269	0.1081	1	1708	1	-0.10937
Vmn1r89	4	0.1714	0.1824	0.598876	6182	1	0.80053	0.029277	0.1081	1	1709	3	0.80053
Ppp1r2	4	0.58455	0.54845	0.857416	13124	2	0.46098	0.029319	0.1081	1	1710	2	0.46098
Olfr1269	4	0.93091	0.86099	1	17739	0	0.89587	0.029323	0.1081	1	1711	3	0.89587
Ccl5	4	0.78457	0.70973	0.937024	15602	1	0.74527	0.029442	0.1081	1	1712	3	0.74527
Rom1	4	0.56594	0.52932	0.848264	12843	1	0.98362	0.029466	0.1081	1	1713	3	0.98362
Prorsd1	4	0.46907	0.44356	0.797252	11426	1	1.1114	0.029486	0.1081	1	1714	3	1.1114
Tchhl1	4	0.46763	0.44273	0.797252	11401	1	0.85006	0.029572	0.1081	1	1715	3	0.85006
Il12rb2	4	0.27732	0.29158	0.687006	8666	2	-0.19929	0.029613	0.10896	1	1716	2	-0.19929
Slc6a18	4	0.69555	0.65652	0.913485	14791	1	0.68667	0.029614	0.10896	1	1717	3	0.68667
Olfr690	4	0.93387	0.86455	1	17814	0	0.09076	0.029621	0.10896	1	1718	2	0.09076
Trim62	3	0.97036	0.94113	1	18698	0	1.5862	0.029636	0.10279	1	1719	3	1.5862
Vmn2r96	4	0.88495	0.79198	0.968698	16838	1	0.82096	0.029666	0.10896	1	1720	3	0.82096
Abcc5	4	0.88678	0.79198	0.968698	16871	1	0.17784	0.029671	0.10896	1	1721	2	0.17784
Odf3l1	4	0.81582	0.73034	0.946554	15906	1	0.39729	0.029721	0.10896	1	1722	2	0.39729
Ldah	4	0.86234	0.76863	0.960217	16501	1	0.91644	0.029789	0.10935	1	1723	2	0.91644
Wdr35	4	0.89752	0.80975	0.976817	17057	1	1.0964	0.029791	0.10935	1	1724	3	1.0964
Igsf8	4	0.97755	0.94915	1	18896	0	0.7504	0.029822	0.10972	1	1725	3	0.7504
Olfr1208	4	0.92969	0.85731	0.999144	17704	1	0.91647	0.029828	0.10972	1	1726	3	0.91647
Hddc3	4	0.60034	0.56244	0.861731	13399	1	0.89497	0.029857	0.10972	1	1727	2	0.89497
Pkd1	4	0.46329	0.4358	0.792855	11337	1	0.60625	0.029869	0.10972	1	1728	3	0.60625
Sbk1	4	0.3078	0.32399	0.715721	9219	2	-0.43441	0.029872	0.10972	1	1729	1	-0.43441
Mettl25	4	0.14569	0.15529	0.561921	5620	1	0.81804	0.029906	0.10972	1	1730	3	0.81804
Hsbp1	4	0.95571	0.89731	1	18303	0	1.1573	0.029958	0.10972	1	1731	3	1.1573
Moxd2	4	0.17492	0.18485	0.598876	6264	1	0.48389	0.029973	0.10972	1	1732	2	0.48389
Tifab	4	0.45404	0.43115	0.790892	11200	1	0.73036	0.029985	0.10972	1	1733	3	0.73036
Adnp	4	0.94271	0.87852	1	18005	0	0.8684	0.029995	0.10972	1	1734	3	0.8684
Olfr1427	4	0.96436	0.91321	1	18540	0	0.95222	0.029995	0.10972	1	1735	3	0.95222
Scin	4	0.28437	0.30036	0.694626	8827	2	0.065479	0.030023	0.10972	1	1736	2	0.065479
Pim2	4	0.7723	0.70126	0.932472	15485	1	0.91855	0.030053	0.10972	1	1737	3	0.91855
Cpeb4	4	0.71931	0.67238	0.922837	14986	1	0.91669	0.030054	0.10972	1	1738	2	0.91669
Ube2e3	4	0.9543	0.89582	1	18260	0	1.0157	0.030095	0.11015	1	1739	3	1.0157
Ear6	4	0.58506	0.54845	0.857416	13133	2	-0.092397	0.030123	0.11015	1	1740	2	-0.092397
Ppfia1	4	0.96837	0.92074	1	18648	0	1.0004	0.030132	0.11015	1	1741	3	1.0004
Snx29	4	0.91965	0.84048	0.991743	17482	1	0.93512	0.030174	0.11015	1	1742	3	0.93512
Cbr2	4	0.76727	0.69843	0.931762	15428	1	1.0277	0.030174	0.11015	1	1743	3	1.0277
Evx2	4	0.67531	0.64529	0.90561	14648	1	0.64967	0.030192	0.11015	1	1744	2	0.64967
Atrn	4	0.78452	0.70973	0.937024	15601	1	0.86059	0.030195	0.11015	1	1745	3	0.86059
Sppl2c	4	0.13583	0.14618	0.542112	5388	3	-0.89859	0.030274	0.11056	1	1746	1	-0.89859
BC068281	4	0.017244	0.014725	0.163342	1816	1	0.8771	0.030316	0.11056	1	1747	3	0.8771
Hcfc1	3	0.090744	0.10348	0.483274	4360	2	-4.4705	0.030331	0.10608	1	1748	1	-4.4705
Grhl3	4	0.96139	0.90654	1	18466	0	0.83629	0.030348	0.11056	1	1749	3	0.83629
Olfr819	4	0.70951	0.66766	0.921034	14912	1	0.95728	0.03036	0.11095	1	1750	3	0.95728
Fam131c	4	0.043554	0.043085	0.288398	3058	3	-1.2966	0.030375	0.11095	1	1751	1	-1.2966
Ffar3	4	0.53486	0.49782	0.826412	12375	1	1.0174	0.030379	0.11095	1	1752	3	1.0174
Olfr810	4	0.65542	0.62812	0.897495	14380	2	0.37773	0.030459	0.11095	1	1753	2	0.37773
Usp42	4	0.67547	0.64529	0.90561	14649	1	0.78219	0.030512	0.11095	1	1754	3	0.78219
Olfr361	4	0.97653	0.94693	1	18867	0	0.90735	0.030528	0.11095	1	1755	3	0.90735
Olfr1204	4	0.98375	0.96134	1	19069	0	1.054	0.030558	0.11095	1	1756	2	1.054
Nnat	4	0.29744	0.31707	0.713202	9076	1	0.71153	0.03056	0.11095	1	1757	3	0.71153
Per2	4	0.73102	0.67795	0.924464	15091	1	0.12321	0.030576	0.11095	1	1758	2	0.12321
Zfp770	4	0.071219	0.073153	0.382431	3905	1	1.0985	0.030597	0.11095	1	1759	3	1.0985
Fhl4	4	0.91816	0.8386	0.991099	17447	1	0.42165	0.030626	0.11095	1	1760	2	0.42165
Olfr324	4	0.92536	0.84883	0.994711	17600	1	0.87418	0.030637	0.11095	1	1761	3	0.87418
Olfr1489	4	0.96875	0.92196	1	18660	0	0.8323	0.030655	0.11137	1	1762	3	0.8323
Padi1	4	0.52559	0.4903	0.822756	12241	2	0.61471	0.030676	0.11183	1	1763	2	0.61471
Bik	4	0.97241	0.93171	1	18762	0	0.9943	0.030716	0.11183	1	1764	3	0.9943
Nox3	4	0.26525	0.27832	0.680591	8377	1	0.65224	0.030735	0.11183	1	1765	3	0.65224
Rbm44	4	0.44873	0.42798	0.790892	11108	2	0.12537	0.030766	0.11183	1	1766	2	0.12537
Lhx3	4	0.77762	0.70405	0.934066	15540	1	0.7244	0.030777	0.11183	1	1767	3	0.7244
Hsbp1l1	4	0.42608	0.41038	0.780843	10809	1	0.83099	0.030836	0.11183	1	1768	3	0.83099
2210010C04Rik	4	0.5677	0.53125	0.8501	12866	1	0.63434	0.030866	0.11183	1	1769	2	0.63434
Alppl2	4	0.83951	0.74627	0.951013	16188	1	0.63874	0.030943	0.11183	1	1770	3	0.63874
Clic1	4	0.96004	0.9038	1	18425	0	0.9145	0.03098	0.11233	1	1771	3	0.9145
Stpg2	4	0.65686	0.62914	0.897495	14411	1	0.90256	0.030986	0.11233	1	1772	3	0.90256
Cd5l	4	0.69314	0.65461	0.912242	14767	1	0.79397	0.031015	0.11234	1	1773	3	0.79397
Sdr39u1	4	0.76344	0.69656	0.931762	15388	1	1.0865	0.031028	0.11234	1	1774	2	1.0865
Olfr460	4	0.90307	0.81259	0.976817	17165	1	0.78332	0.03105	0.11276	1	1775	3	0.78332
Cyp2c54	4	0.64369	0.61593	0.890562	14172	1	0.86542	0.031061	0.11276	1	1776	3	0.86542
Mgmt	4	0.96589	0.91834	1	18583	0	0.83251	0.031077	0.11276	1	1777	3	0.83251
Heatr5b	4	0.60127	0.56244	0.861731	13412	1	0.61221	0.031078	0.11276	1	1778	3	0.61221
Psma1	3	0.44056	0.41639	0.78726	10994	1	-0.077858	0.031087	0.10821	1	1779	1	-0.077858
Mtx3	4	0.61742	0.58566	0.878958	13701	2	0.53494	0.031105	0.11276	1	1780	2	0.53494
Cacna1e	4	0.61402	0.58244	0.878661	13635	1	0.80667	0.03112	0.11276	1	1781	3	0.80667
Slc12a2	4	0.24024	0.25287	0.666388	7785	3	-0.55511	0.031128	0.11276	1	1782	1	-0.55511
Ccdc85a	4	0.88971	0.79853	0.973477	16921	1	0.86999	0.031135	0.11276	1	1783	3	0.86999
Prrx2	4	0.17655	0.18534	0.598876	6305	1	0.82509	0.031163	0.11276	1	1784	3	0.82509
Dhrs2	4	0.073188	0.07338	0.382431	3945	1	0.26325	0.031178	0.11276	1	1785	2	0.26325
Gm11437	4	0.31866	0.32988	0.719644	9368	2	0.17896	0.031215	0.11276	1	1786	2	0.17896
Ccr5	4	0.63119	0.59924	0.883583	13923	2	0.50359	0.031229	0.11276	1	1787	2	0.50359
Dennd4c	4	0.97019	0.92488	1	18694	0	0.53953	0.031279	0.11276	1	1788	2	0.53953
Ankrd27	4	0.29645	0.31707	0.713202	9060	1	1.0594	0.031292	0.11276	1	1789	3	1.0594
Gimap5	4	0.33124	0.34238	0.730627	9554	2	-0.19851	0.031329	0.11276	1	1790	2	-0.19851
Gpr65	4	0.96019	0.90449	1	18430	0	1.1246	0.031346	0.11319	1	1791	3	1.1246
Lbr	4	0.57345	0.53671	0.850988	12945	2	0.35224	0.031375	0.11319	1	1792	2	0.35224
Edn1	4	0.32053	0.33165	0.721677	9399	2	-0.73663	0.031379	0.11319	1	1793	1	-0.73663
Kcnmb1	4	0.033035	0.029918	0.230406	2601	1	0.85803	0.0314	0.11319	1	1794	3	0.85803
Mns1	4	0.23135	0.23926	0.649044	7575	3	-0.59874	0.031429	0.11319	1	1795	1	-0.59874
Rnf185	4	0.95442	0.89582	1	18264	0	0.82675	0.031454	0.11319	1	1796	3	0.82675
Olfr1445	4	0.7178	0.67144	0.922791	14975	1	0.81394	0.031455	0.11319	1	1797	2	0.81394
Nedd4l	4	0.52732	0.49123	0.822756	12263	2	0.043166	0.03148	0.11416	1	1798	2	0.043166
Izumo1	4	0.82061	0.73599	0.950082	15961	1	0.36284	0.03153	0.11506	1	1799	3	0.36284
1700019B03Rik	4	0.66416	0.64035	0.905393	14538	1	0.51448	0.03163	0.11506	1	1800	3	0.51448
Dock6	4	0.36586	0.36589	0.748358	10043	2	-0.22306	0.03168	0.11555	1	1801	1	-0.22306
Spg21	4	0.31207	0.32583	0.718646	9277	2	0.26381	0.031697	0.11555	1	1802	2	0.26381
Fam71f1	4	0.8271	0.74068	0.950082	16030	1	0.95055	0.031737	0.11555	1	1803	2	0.95055
Myo1h	4	0.80059	0.71996	0.940776	15751	1	0.90453	0.031762	0.11555	1	1804	3	0.90453
Fcna	4	0.88935	0.79853	0.973477	16918	1	0.89272	0.031768	0.11555	1	1805	3	0.89272
Vmn1r40	4	0.9607	0.90587	1	18445	0	0.47657	0.031781	0.11555	1	1806	2	0.47657
Sat2	4	0.53808	0.50004	0.827443	12426	2	0.39864	0.031788	0.11555	1	1807	2	0.39864
Igfbpl1	4	0.84502	0.75188	0.952798	16269	1	0.79409	0.031806	0.11555	1	1808	3	0.79409
Them4	4	0.96841	0.92075	1	18651	0	0.89008	0.031818	0.11555	1	1809	2	0.89008
Bcl11b	4	0.91497	0.83302	0.988938	17381	1	0.81016	0.031822	0.11555	1	1810	3	0.81016
Tex36	4	0.77831	0.70594	0.935254	15545	1	0.74347	0.031878	0.11555	1	1811	2	0.74347
Gdpgp1	4	0.12751	0.13941	0.538581	5215	3	-1.3336	0.031881	0.11555	1	1812	1	-1.3336
Pdzph1	4	0.88891	0.7976	0.973439	16911	1	0.69748	0.031904	0.11555	1	1813	3	0.69748
Mybpc3	4	0.61502	0.58458	0.878958	13656	1	0.92495	0.031915	0.11555	1	1814	3	0.92495
Mc2r	4	0.9361	0.86992	1	17861	0	1.0691	0.03201	0.11555	1	1815	3	1.0691
Lmod1	4	0.94298	0.87852	1	18013	0	0.47355	0.032032	0.11555	1	1816	2	0.47355
1700013H16Rik	4	0.54126	0.50133	0.827443	12470	1	0.78099	0.032067	0.11555	1	1817	3	0.78099
Clcn2	4	0.79814	0.71621	0.938735	15727	1	0.96955	0.032101	0.11555	1	1818	3	0.96955
Slc35f1	4	0.54429	0.50448	0.830582	12522	2	-0.13144	0.032132	0.11555	1	1819	2	-0.13144
Epha1	4	0.96746	0.91955	1	18626	0	0.8066	0.03216	0.11555	1	1820	3	0.8066
Agfg2	4	0.80288	0.71996	0.940776	15772	1	0.82159	0.032202	0.11555	1	1821	3	0.82159
Klk10	4	0.69978	0.65937	0.914122	14832	1	0.71586	0.032233	0.11555	1	1822	2	0.71586
Pcdhb18	4	0.45765	0.43199	0.790892	11257	2	-0.10344	0.032283	0.11555	1	1823	1	-0.10344
Sept2	4	0.45882	0.43349	0.790892	11270	1	0.68671	0.032333	0.11555	1	1824	3	0.68671
Zfp809	4	0.90534	0.81636	0.97777	17205	1	0.79398	0.032352	0.11555	1	1825	3	0.79398
Gsta4	4	0.44311	0.42562	0.790892	11024	1	0.93831	0.032391	0.11824	1	1826	3	0.93831
Satb2	4	0.93621	0.86992	1	17866	0	0.68925	0.032402	0.11824	1	1827	3	0.68925
Wdr86	4	0.97431	0.93852	1	18806	0	0.71472	0.032418	0.11825	1	1828	3	0.71472
Apol9a	4	0.52611	0.49123	0.822756	12251	1	0.17613	0.032483	0.11923	1	1829	2	0.17613
Apoo	4	0.8283	0.74068	0.950082	16048	1	0.59107	0.032512	0.11971	1	1830	3	0.59107
Erlin2	4	0.91887	0.83955	0.991099	17467	1	0.59992	0.032534	0.11971	1	1831	2	0.59992
Egfem1	4	0.65698	0.62914	0.897495	14414	1	0.67738	0.032545	0.11971	1	1832	3	0.67738
Slco4c1	4	0.93349	0.86455	1	17805	0	0.56258	0.032558	0.11971	1	1833	2	0.56258
P2ry13	4	0.62695	0.59507	0.883583	13849	1	0.78023	0.032578	0.11971	1	1834	3	0.78023
Ccl3	4	0.94651	0.88425	1	18091	0	0.73909	0.0326	0.11971	1	1835	3	0.73909
Aff2	4	0.97899	0.95215	1	18949	0	0.34558	0.032634	0.11971	1	1836	3	0.34558
Grem2	4	0.93648	0.87079	1	17875	0	0.95455	0.03264	0.11971	1	1837	3	0.95455
5430421N21Rik	4	0.46852	0.44273	0.797252	11415	1	0.79946	0.03265	0.11971	1	1838	3	0.79946
Rnf220	4	0.7266	0.67608	0.922837	15053	1	1.2233	0.03266	0.11971	1	1839	3	1.2233
Slc38a11	4	0.96119	0.90654	1	18460	0	0.97409	0.03267	0.12012	1	1840	3	0.97409
Clec2g	4	0.15044	0.15758	0.561921	5717	2	0.42307	0.032681	0.12012	1	1841	2	0.42307
Olfr918	4	0.3146	0.32783	0.719504	9316	1	0.58379	0.032689	0.12012	1	1842	3	0.58379
Eci1	4	0.89422	0.80322	0.975383	16991	1	0.54681	0.032711	0.12012	1	1843	2	0.54681
Hist1h4i	4	0.34987	0.35454	0.741763	9808	2	0.52916	0.032732	0.12012	1	1844	2	0.52916
Txndc9	4	0.17512	0.18485	0.598876	6270	2	-0.19267	0.032734	0.12012	1	1845	1	-0.19267
Zfp36	4	0.93291	0.86455	1	17788	0	0.99939	0.032766	0.12012	1	1846	3	0.99939
Agtr1b	4	0.79833	0.71716	0.939564	15730	1	-0.16241	0.032784	0.12055	1	1847	1	-0.16241
Vmn1r14	4	0.53865	0.50133	0.827443	12433	2	-0.22697	0.032885	0.12055	1	1848	1	-0.22697
Pdgfrb	4	0.059245	0.0604	0.339393	3628	2	0.19529	0.032895	0.12055	1	1849	2	0.19529
Ccdc62	4	0.22475	0.23444	0.648021	7418	1	1.0673	0.032935	0.12055	1	1850	3	1.0673
Slc5a9	4	0.052938	0.054668	0.323508	3410	2	0.038393	0.032967	0.12055	1	1851	2	0.038393
Otor	4	0.21504	0.2252	0.640412	7205	1	0.7246	0.032985	0.12055	1	1852	2	0.7246
Lrrc34	4	0.75847	0.69286	0.93072	15336	1	0.72508	0.032994	0.12055	1	1853	3	0.72508
Slc8b1	4	0.47136	0.44438	0.797252	11459	2	0.18259	0.033035	0.12055	1	1854	2	0.18259
Mical1	4	0.88311	0.78829	0.968143	16804	1	0.87838	0.033059	0.12055	1	1855	3	0.87838
Acot4	4	0.49123	0.45975	0.805197	11774	2	0.21607	0.033085	0.12055	1	1856	2	0.21607
Ubl4	4	0.55835	0.51761	0.837699	12723	1	0.71583	0.033111	0.12055	1	1857	3	0.71583
Thumpd2	4	0.66858	0.64529	0.90561	14592	1	0.24098	0.033135	0.12055	1	1858	2	0.24098
Zfp706	4	0.47113	0.44438	0.797252	11454	1	1.5199	0.033172	0.12055	1	1859	3	1.5199
Mfsd9	4	0.80531	0.7237	0.944293	15793	1	0.90201	0.033233	0.12055	1	1860	3	0.90201
Usp36	4	0.1864	0.19542	0.605616	6516	2	-2.0249	0.033236	0.12055	1	1861	2	-2.0249
Tmem202	4	0.84338	0.75188	0.952798	16238	1	0.86347	0.033256	0.12055	1	1862	3	0.86347
Ezh1	4	0.97062	0.92608	1	18708	0	0.67929	0.033261	0.12055	1	1863	3	0.67929
Gad1	4	0.90154	0.81164	0.976817	17142	1	0.76442	0.033296	0.12055	1	1864	2	0.76442
Gm4788	4	0.54554	0.50576	0.830928	12538	2	0.56261	0.033327	0.12055	1	1865	2	0.56261
Ank3	4	0.94536	0.88263	1	18068	0	0.22534	0.033336	0.12055	1	1866	2	0.22534
Eif4h	4	0.98566	0.96509	1	19115	0	0.84742	0.033379	0.12055	1	1867	3	0.84742
Gpr173	4	0.92766	0.85162	0.995047	17648	1	0.42158	0.033386	0.12055	1	1868	3	0.42158
Brd4	4	0.98579	0.9654	1	19120	0	0.92361	0.033389	0.12055	1	1869	3	0.92361
Ammecr1l	4	0.92864	0.85449	0.997386	17676	1	0.7103	0.033396	0.12055	1	1870	3	0.7103
Olfr814	4	0.79197	0.71529	0.938179	15671	1	0.67668	0.033413	0.12055	1	1871	3	0.67668
Nudt12	4	0.55678	0.51761	0.837699	12693	2	-0.24459	0.033486	0.12055	1	1872	1	-0.24459
Cspg5	4	0.8116	0.72746	0.945545	15851	1	0.99797	0.03353	0.12055	1	1873	3	0.99797
Kctd1	4	0.48593	0.45664	0.803431	11699	2	-0.28783	0.033537	0.12055	1	1874	1	-0.28783
Gpatch8	4	0.94101	0.87341	1	17977	0	0.91803	0.033547	0.12055	1	1875	3	0.91803
Nfic	4	0.4741	0.44698	0.797252	11510	2	0.37462	0.033564	0.12055	1	1876	2	0.37462
Neil2	4	0.96785	0.92014	1	18637	0	0.76132	0.033581	0.12055	1	1877	3	0.76132
Ptpn21	4	0.48112	0.45399	0.803431	11621	1	0.6189	0.033587	0.12055	1	1878	2	0.6189
Sik3	4	0.60181	0.56245	0.861731	13420	2	0.43505	0.033595	0.12055	1	1879	2	0.43505
Atp1b3	4	0.21809	0.22751	0.640412	7268	2	-1.1098	0.033687	0.12055	1	1880	2	-1.1098
Olfr1131	4	0.91316	0.83209	0.988938	17354	1	0.86975	0.033698	0.12055	1	1881	3	0.86975
Nicn1	4	0.46258	0.43579	0.792855	11325	1	0.91023	0.033705	0.12055	1	1882	3	0.91023
Casp3	4	0.95688	0.89879	1	18328	0	0.71275	0.03371	0.12055	1	1883	3	0.71275
Vmn2r98	4	0.90611	0.81636	0.97777	17225	1	0.92901	0.033737	0.12055	1	1884	2	0.92901
Smim3	4	0.90001	0.81069	0.976817	17116	1	0.99128	0.03375	0.12055	1	1885	3	0.99128
Drd4	4	0.98176	0.9581	1	19021	0	1.0104	0.033767	0.12055	1	1886	3	1.0104
Syt1	4	0.71832	0.67144	0.922791	14980	1	0.80418	0.033843	0.12055	1	1887	2	0.80418
Sox13	4	0.92175	0.846	0.993541	17529	1	0.64673	0.033891	0.12055	1	1888	3	0.64673
Ddb2	4	0.6251	0.59197	0.881311	13818	1	1.0378	0.033906	0.12055	1	1889	3	1.0378
Heatr5a	4	0.98452	0.96275	1	19088	0	0.66668	0.033919	0.12055	1	1890	3	0.66668
Spns2	4	0.97446	0.93852	1	18809	0	0.70617	0.033925	0.12055	1	1891	3	0.70617
C1s1	4	0.2402	0.25287	0.666388	7784	3	-0.51644	0.033937	0.12055	1	1892	1	-0.51644
Snta1	4	0.87149	0.77613	0.962982	16622	1	0.93978	0.033968	0.12055	1	1893	3	0.93978
Ydjc	4	0.84356	0.75188	0.952798	16243	1	0.57806	0.033988	0.12055	1	1894	2	0.57806
Lrrc23	4	0.37999	0.37615	0.756507	10224	1	0.71499	0.034067	0.12143	1	1895	3	0.71499
Lep	4	0.97157	0.92897	1	18734	0	0.76506	0.034084	0.12193	1	1896	3	0.76506
Parm1	4	0.012056	0.011609	0.15269	1529	2	-0.56165	0.034088	0.12193	1	1897	1	-0.56165
Upp1	4	0.7181	0.67144	0.922791	14978	1	0.47454	0.034103	0.12247	1	1898	2	0.47454
Aifm1	4	0.5297	0.49219	0.822756	12294	2	0.20932	0.034113	0.12247	1	1899	2	0.20932
Olfr483	4	0.70443	0.66118	0.914907	14873	1	0.91553	0.034123	0.12247	1	1900	3	0.91553
Apbb1	4	0.14798	0.15706	0.561921	5668	1	0.83327	0.034145	0.12247	1	1901	3	0.83327
Spt1	4	0.61641	0.58566	0.878958	13685	1	0.77155	0.034166	0.12247	1	1902	2	0.77155
Trip6	4	0.68578	0.65	0.908886	14713	1	0.63758	0.034169	0.12247	1	1903	3	0.63758
4921530L21Rik	4	0.97589	0.94423	1	18848	0	0.89267	0.034176	0.12247	1	1904	3	0.89267
Il1b	4	0.77194	0.70126	0.932472	15481	1	0.58463	0.034188	0.12247	1	1905	2	0.58463
Fam160b2	4	0.94289	0.87852	1	18010	0	1.0078	0.034231	0.12247	1	1906	3	1.0078
Zfp804b	4	0.88809	0.79479	0.97098	16894	1	1.148	0.034238	0.12511	1	1907	2	1.148
Acbd7	4	0.8709	0.77519	0.962982	16616	1	0.76234	0.034259	0.12511	1	1908	2	0.76234
Cntnap5c	4	0.95958	0.9031	1	18412	0	0.95215	0.034266	0.12511	1	1909	3	0.95215
Dlx6	4	0.94245	0.87769	1	17998	0	0.92318	0.034317	0.12511	1	1910	3	0.92318
Zfp59	4	0.88477	0.79104	0.968698	16835	1	0.28778	0.034338	0.12511	1	1911	2	0.28778
Kctd12b	4	0.93565	0.86817	1	17849	0	0.9658	0.034362	0.12511	1	1912	3	0.9658
Nucb2	4	0.46187	0.43433	0.791453	11314	2	-0.31798	0.034388	0.12511	1	1913	1	-0.31798
Dnaic1	4	0.69411	0.65556	0.912273	14779	1	0.76983	0.034414	0.12511	1	1914	3	0.76983
Klhdc8a	4	0.45201	0.43029	0.790892	11163	2	0.49113	0.034416	0.12511	1	1915	2	0.49113
Olfr1386	4	0.10635	0.12337	0.525385	4754	3	-1.3573	0.034438	0.12511	1	1916	1	-1.3573
Pfdn2	3	0.08505	0.098839	0.465181	4229	2	-5.1147	0.03452	0.12125	1	1917	1	-5.1147
Myo1c	4	0.93315	0.86455	1	17794	0	1.2169	0.034557	0.12511	1	1918	3	1.2169
Akr1c14	4	0.12246	0.13548	0.538581	5102	2	-0.854	0.034604	0.12511	1	1919	2	-0.854
Acvrl1	4	0.61423	0.58356	0.878958	13642	2	0.17432	0.034639	0.12557	1	1920	2	0.17432
Vmn1r20	4	0.43831	0.4248	0.790892	10973	1	0.74021	0.034689	0.12601	1	1921	3	0.74021
Gm13084	4	0.88352	0.79011	0.968698	16812	1	0.66623	0.034711	0.12601	1	1922	3	0.66623
Twist1	4	0.85068	0.75745	0.956452	16336	1	0.76085	0.034717	0.12601	1	1923	3	0.76085
Gm6432	4	0.44076	0.42562	0.790892	10997	1	1.0286	0.034752	0.12601	1	1924	3	1.0286
Mroh4	4	0.51902	0.48212	0.818128	12145	1	0.70195	0.034792	0.12601	1	1925	3	0.70195
Pirt	4	0.98416	0.96241	1	19081	0	0.83669	0.034809	0.12601	1	1926	3	0.83669
Col15a1	4	0.97972	0.95376	1	18976	0	0.77115	0.034826	0.12601	1	1927	3	0.77115
Pard6g	4	0.42067	0.40402	0.773649	10751	2	0.23404	0.034835	0.12601	1	1928	2	0.23404
Gcfc2	4	0.72621	0.67608	0.922837	15047	1	0.12769	0.034839	0.12601	1	1929	2	0.12769
Fbn2	4	0.65304	0.62502	0.897237	14337	1	0.8532	0.034855	0.12601	1	1930	3	0.8532
Mfi2	4	0.5608	0.52204	0.842815	12750	1	0.78868	0.034929	0.12601	1	1931	3	0.78868
Abhd5	4	0.98339	0.96064	1	19061	0	0.71471	0.034939	0.12601	1	1932	3	0.71471
Vmn1r45	4	0.27091	0.28573	0.682929	8514	1	0.59968	0.035022	0.12601	1	1933	3	0.59968
Gan	4	0.47452	0.44698	0.797252	11518	2	0.32766	0.035045	0.12646	1	1934	2	0.32766
Mmp17	4	0.82162	0.73784	0.950082	15970	1	0.95377	0.035062	0.12646	1	1935	3	0.95377
H2-M5	4	0.93845	0.87166	1	17916	0	0.6201	0.035068	0.12646	1	1936	3	0.6201
Mslnl	4	0.96282	0.91119	1	18502	0	0.24003	0.03509	0.12646	1	1937	2	0.24003
Hoxd8	4	0.43578	0.4207	0.790892	10934	1	0.017697	0.03514	0.12646	1	1938	1	0.017697
Zfp882	4	0.18688	0.19542	0.605616	6528	2	0.3255	0.03519	0.12646	1	1939	2	0.3255
Ccdc15	4	0.014093	0.012671	0.155521	1654	2	0.48667	0.035193	0.12646	1	1940	2	0.48667
Ctbs	4	0.61858	0.58777	0.880711	13722	1	0.72351	0.0353	0.12646	1	1941	3	0.72351
Nutm1	4	0.96751	0.91955	1	18627	0	0.69259	0.035305	0.12646	1	1942	3	0.69259
Npw	4	0.90375	0.81451	0.97777	17178	1	0.86646	0.035334	0.12646	1	1943	3	0.86646
Lrg1	4	0.96754	0.91955	1	18628	0	1.0764	0.03534	0.12646	1	1944	3	1.0764
Usp17ld	4	0.96503	0.91515	1	18561	0	1.0077	0.035381	0.12646	1	1945	3	1.0077
Stx1a	4	0.88354	0.79011	0.968698	16813	1	0.68439	0.03539	0.12646	1	1946	2	0.68439
Olfr1136	4	0.61408	0.58244	0.878661	13639	2	0.52993	0.035425	0.12646	1	1947	2	0.52993
1700015F17Rik	4	0.96644	0.91894	1	18604	0	0.91434	0.035478	0.12646	1	1948	3	0.91434
Tlr13	4	0.61218	0.57711	0.87209	13602	1	0.57919	0.035509	0.1269	1	1949	3	0.57919
Ccr1l1	4	0.69786	0.65937	0.914122	14815	1	0.95069	0.035515	0.1269	1	1950	3	0.95069
Hnrnpul1	4	0.88795	0.79385	0.970126	16890	1	0.89103	0.03552	0.1269	1	1951	3	0.89103
Luzp1	4	0.31669	0.32918	0.719644	9342	2	-0.11071	0.03554	0.1269	1	1952	2	-0.11071
4933402J07Rik	4	0.26385	0.27771	0.679865	8344	3	-0.47404	0.03564	0.1269	1	1953	1	-0.47404
Cobll1	4	0.46335	0.4358	0.792855	11339	2	0.37636	0.035711	0.12736	1	1954	2	0.37636
Neurl3	4	0.83837	0.74534	0.9507	16170	1	0.72064	0.03576	0.12736	1	1955	3	0.72064
Slc2a6	4	0.85805	0.76593	0.960217	16453	1	0.86894	0.035817	0.12736	1	1956	2	0.86894
Ace	4	0.14868	0.15758	0.561921	5685	1	0.22244	0.03584	0.12782	1	1957	2	0.22244
Akirin1	4	0.97951	0.9526	1	18968	0	1.7513	0.03587	0.12828	1	1958	3	1.7513
Usp32	4	0.66268	0.63823	0.90389	14515	1	0.902	0.035913	0.12828	1	1959	3	0.902
Tpsb2	4	0.83404	0.74347	0.950082	16117	1	0.96635	0.035918	0.12828	1	1960	3	0.96635
Sap130	4	0.32282	0.33231	0.721677	9422	2	0.14526	0.036009	0.12828	1	1961	2	0.14526
1700093K21Rik	4	0.20394	0.21209	0.625335	6944	1	1.0715	0.036062	0.12828	1	1962	3	1.0715
Itsn1	4	0.73412	0.68072	0.925816	15117	1	0.68725	0.036094	0.12828	1	1963	2	0.68725
Mapk1ip1	4	0.83059	0.74165	0.950082	16081	1	0.71327	0.036105	0.12828	1	1964	3	0.71327
Kcnj8	4	0.18815	0.19647	0.605616	6559	2	-0.5487	0.03614	0.12828	1	1965	2	-0.5487
Scml2	4	0.93113	0.86099	1	17747	0	0.66245	0.036179	0.12828	1	1966	2	0.66245
Fzd1	4	0.4619	0.43433	0.791453	11315	1	0.58659	0.036211	0.12828	1	1967	2	0.58659
Tmem198	4	0.63602	0.60447	0.885225	14026	1	0.76472	0.036247	0.12828	1	1968	3	0.76472
Olfr38	4	0.92972	0.85731	0.999144	17706	1	1.0885	0.03627	0.12828	1	1969	3	1.0885
Sgtb	4	0.5259	0.49123	0.822756	12248	2	-0.14542	0.036291	0.12828	1	1970	1	-0.14542
Mamdc2	4	0.97495	0.94049	1	18824	0	0.61658	0.036317	0.12828	1	1971	3	0.61658
Nfe2l3	4	0.9622	0.9099	1	18491	0	0.61978	0.03637	0.12828	1	1972	3	0.61978
Fam43b	4	0.91085	0.82928	0.988478	17303	1	0.22127	0.036391	0.12875	1	1973	2	0.22127
Oas1f	4	0.42203	0.40641	0.777654	10764	1	0.8414	0.036393	0.12875	1	1974	3	0.8414
Bcam	4	0.61048	0.57286	0.868532	13577	2	0.72511	0.036404	0.12875	1	1975	2	0.72511
Stard5	4	0.86646	0.77053	0.960217	16564	1	0.7127	0.036415	0.12875	1	1976	2	0.7127
Fzd4	4	0.59892	0.56147	0.861731	13367	1	0.22748	0.036441	0.12875	1	1977	2	0.22748
Actn4	4	0.13158	0.14302	0.542112	5310	1	0.84577	0.036477	0.12875	1	1978	3	0.84577
Glyr1	4	0.96765	0.92014	1	18630	0	1.0942	0.036479	0.12875	1	1979	3	1.0942
2610020H08Rik	4	0.57218	0.5355	0.850988	12932	2	-0.18335	0.036491	0.12875	1	1980	1	-0.18335
Cltb	4	0.54968	0.50796	0.831301	12586	2	0.77218	0.036543	0.12875	1	1981	2	0.77218
Zfp119a	4	0.73511	0.68165	0.925816	15132	1	0.8677	0.036586	0.12875	1	1982	2	0.8677
Mat2b	4	0.87462	0.77983	0.965045	16667	1	0.73869	0.036631	0.12875	1	1983	3	0.73869
Adora1	4	0.15781	0.16819	0.582368	5894	2	-0.2293	0.03664	0.12875	1	1984	2	-0.2293
Slc51a	4	0.059622	0.060401	0.339393	3635	3	-1.4978	0.036641	0.12875	1	1985	1	-1.4978
Olfr137	4	0.98088	0.95537	1	19001	0	0.95249	0.036672	0.12875	1	1986	2	0.95249
Zfp943	4	0.85313	0.7593	0.957213	16371	1	0.34117	0.036691	0.12875	1	1987	2	0.34117
Usp18	4	0.71046	0.6686	0.921034	14920	1	0.6804	0.036702	0.12875	1	1988	3	0.6804
Gp2	3	0.67791	0.58228	0.878661	14666	1	0.70831	0.036778	0.12956	1	1989	2	0.70831
Smim15	4	0.61258	0.57711	0.87209	13613	1	0.73115	0.03679	0.12875	1	1990	2	0.73115
Zdhhc22	4	0.62264	0.59092	0.881311	13772	2	-0.29813	0.036791	0.12875	1	1991	1	-0.29813
Cyp2c70	4	0.75861	0.69286	0.93072	15338	1	0.8712	0.036809	0.12875	1	1992	3	0.8712
Btf3	3	0.31995	0.29629	0.68967	9389	1	1.6489	0.036819	0.12956	1	1993	2	1.6489
Rln3	4	0.76612	0.69843	0.931762	15409	1	0.94587	0.036833	0.12875	1	1994	2	0.94587
Morc2a	4	0.79157	0.71529	0.938179	15666	1	0.92216	0.036844	0.12919	1	1995	3	0.92216
Olfr1157	4	0.29285	0.31514	0.713202	9016	1	0.8793	0.036865	0.12919	1	1996	3	0.8793
Ldlrad3	4	0.069476	0.068771	0.36571	3861	2	-1.2016	0.036891	0.12919	1	1997	1	-1.2016
Bhlha9	4	0.80246	0.71996	0.940776	15767	1	0.61798	0.036898	0.12919	1	1998	2	0.61798
Vtn	4	0.86302	0.76863	0.960217	16510	1	0.75011	0.036904	0.12919	1	1999	3	0.75011
[truncated: 17,647 more rows]
