# Supplementary material for: The Fas–FADD–caspase-8 axis is a cancer cell-intrinsic determinant of cytotoxic lymphocyte–mediated killing
Source: bioRxiv preprint, doi:10.64898/2026.06.14.732110, version 2 (2026-07-15)
Supplement: Supplementary Table II [file 732110_file04.xlsx]

## Sheet: rra_norm_control_day0.gene_summ
id	num	neg|score	neg|p-value	neg|fdr	neg|rank	neg|goodsgrna	neg|lfc	pos|score	pos|p-value	pos|fdr	pos|rank	pos|goodsgrna	pos|lfc
Spi1	4	1	1	1	19674	0	17.102	3.89e-18	2.4e-07	0.00045	1	4	17.102
Fcer1g	4	1	1	1	19673	0	14.782	1.2e-12	2.4e-07	0.00045	2	4	14.782
Brd2	4	1	1	1	19672	0	10.609	2.08e-10	2.4e-07	0.00045	3	4	10.609
Kmt2c	4	1	1	1	19671	0	9.7278	1.09e-09	2.4e-07	0.00045	4	4	9.7278
Fcgr1	4	1	1	1	19670	0	9.2081	3.92e-09	2.4e-07	0.00045	5	4	9.2081
Atp2b1	4	1	1	1	19669	0	8.0205	1.42e-08	2.4e-07	0.00045	6	4	8.0205
Bap1	4	1	1	1	19668	0	9.5007	1.65e-08	2.4e-07	0.00045	7	4	9.5007
Taf4a	4	0.99999	0.99996	1	19651	0	11.482	4.41e-08	2.4e-07	0.00045	8	4	11.482
Tm9sf2	4	1	1	1	19667	0	7.8017	7.74e-08	2.4e-07	0.00045	9	4	7.8017
Fas	4	1	1	1	19666	0	8.308	1.1e-07	2.4e-07	0.00045	10	4	8.308
Casp8	4	1	1	1	19665	0	6.6156	2.86e-07	2.4e-07	0.00045	11	4	6.6156
Usp9x	4	1	1	1	19664	0	6.6099	4.48e-07	7.19e-07	0.001238	12	4	6.6099
Pih1d1	4	1	1	1	19663	0	6.7145	5.51e-07	1.2e-06	0.001768	13	4	6.7145
Sec62	4	1	1	1	19659	0	8.6187	5.88e-07	1.2e-06	0.001768	14	4	8.6187
Fcgr3	4	1	1	1	19661	0	8.4342	6.72e-07	1.68e-06	0.002038	15	4	8.4342
Nptn	4	1	1	1	19662	0	6.7918	6.89e-07	1.68e-06	0.002038	16	4	6.7918
Tnrc6a	4	0.13304	0.39543	1	5965	1	8.7347	7.44e-07	1.68e-06	0.002038	17	3	8.7347
Atxn2l	4	1	1	1	19660	0	7.5883	1.29e-06	2.16e-06	0.002475	18	4	7.5883
Nelfe	4	1	1	1	19658	0	7.3299	2.22e-06	3.59e-06	0.003908	19	4	7.3299
Myo9b	4	0.99998	0.99995	1	19648	0	8.0628	3.75e-06	7.91e-06	0.007876	20	4	8.0628
Nmt1	4	1	0.99999	1	19657	0	5.4984	3.94e-06	8.39e-06	0.007876	21	4	5.4984
Srf	4	1	0.99999	1	19656	0	5.3416	3.96e-06	8.39e-06	0.007876	22	4	5.3416
Fadd	4	0.99999	0.99998	1	19655	0	5.5871	7.61e-06	2.13e-05	0.019156	23	4	5.5871
Sephs1	4	0.99999	0.99997	1	19654	0	5.0949	1.16e-05	2.85e-05	0.02396	24	4	5.0949
Cs	4	0.99999	0.99997	1	19653	0	5.4736	1.17e-05	2.9e-05	0.02396	25	4	5.4736
Hnrnpab	4	0.99999	0.99997	1	19652	0	5.0184	1.24e-05	3.19e-05	0.024752	26	4	5.0184
Fli1	4	0.99516	0.98715	1	19477	0	7.5688	1.25e-05	3.24e-05	0.024752	27	4	7.5688
Tmem30a	4	0.99998	0.99995	1	19650	0	6.5791	1.51e-05	5.39e-05	0.039781	28	4	6.5791
Lsm12	4	0.99998	0.99995	1	19649	0	6.4626	1.76e-05	6.78e-05	0.04831	29	4	6.4626
9130011E15Rik	4	0.99998	0.99994	1	19647	0	5.5294	1.9e-05	7.5e-05	0.05165	30	4	5.5294
Rbm26	4	0.99997	0.99991	1	19646	0	6.3345	2.55e-05	0.00011335	0.075535	31	4	6.3345
Odam	4	0.99628	0.98939	1	19505	0	6.4872	2.9e-05	0.00012725	0.082147	32	4	6.4872
Wasf2	4	0.99997	0.99989	1	19645	0	5.7401	3.12e-05	0.00013348	0.083558	33	4	5.7401
Fzr1	4	0.99996	0.99985	1	19644	0	5.0852	3.8e-05	0.00019147	0.110149	34	4	5.0852
Aip	4	0.99559	0.98823	1	19486	0	6.4871	3.88e-05	0.00019195	0.110149	35	4	6.4871
Olfr1340	4	0.99996	0.99985	1	19643	0	4.6446	4.08e-05	0.00019866	0.110918	36	4	4.6446
Ing3	4	0.96888	0.92955	1	18783	0	5.8111	4.89e-05	0.00023221	0.126238	37	3	5.8111
Taf7	4	0.3559	0.60455	1	11094	2	1.8563	5.99e-05	0.00030171	0.159812	38	2	1.8563
Aox3	4	0.7095	0.79424	1	15834	1	6.228	6.88e-05	0.00035395	0.177157	39	3	6.228
Rybp	4	0.99993	0.99976	1	19642	0	6.103	7.09e-05	0.00035395	0.177157	40	4	6.103
Nelfa	4	0.66101	0.77042	1	15291	2	2.3804	7.14e-05	0.00036018	0.177157	41	2	2.3804
Irf2bp2	3	0.99993	0.99989	1	19641	0	5.2554	7.26e-05	0.00015696	0.09537	42	3	5.2554
Tsnax	4	0.1055	0.35521	1	5162	1	5.0401	9.08e-05	0.0005054	0.242805	43	3	5.0401
Whsc1	4	0.98129	0.95551	1	19091	0	5.8546	9.47e-05	0.00052218	0.245162	44	4	5.8546
Tal1	4	0.9999	0.99967	1	19640	0	5.7712	0.00010095	0.00056771	0.260616	45	4	5.7712
Arg2	4	0.9999	0.99965	1	19639	0	4.9101	0.00010379	0.00058448	0.262484	46	4	4.9101
Mmp1a	4	0.99266	0.9799	1	19404	0	6.1917	0.00010938	0.0006118	0.265407	47	4	6.1917
Pced1b	4	0.99989	0.99962	1	19638	0	5.1674	0.00011162	0.00062954	0.265407	48	4	5.1674
Foxa1	4	0.99989	0.99962	1	19637	0	5.2735	0.00011173	0.00062954	0.265407	49	4	5.2735
Abca14	4	0.99985	0.9995	1	19636	0	3.6762	0.00014964	0.00075846	0.307416	50	4	3.6762
Otud5	4	0.99985	0.9995	1	19635	0	3.9556	0.00015247	0.00075894	0.307416	51	4	3.9556
Stpg2	4	0.99864	0.99594	1	19588	0	6.222	0.00015761	0.00079441	0.315594	52	4	6.222
Mapk1	4	0.99983	0.99944	1	19634	0	4.4225	0.00017316	0.00087732	0.341958	53	4	4.4225
Actr3	4	0.99878	0.99643	1	19595	0	5.5528	0.00018197	0.0009195	0.35176	54	4	5.5528
Slc39a7	4	0.99981	0.99932	1	19633	0	4.8738	0.00019478	0.0010101	0.379388	55	4	4.8738
Sos1	4	0.9998	0.99932	1	19632	0	4.9765	0.00020157	0.0010513	0.387818	56	4	4.9765
Cfap126	4	0.99979	0.99929	1	19631	0	4.222	0.00021153	0.00115	0.409611	57	4	4.222
Fam21	4	0.95917	0.90802	1	18592	0	5.1595	0.0002256	0.0012488	0.437238	58	3	5.1595
Srgap1	4	0.4785	0.67558	1	12797	1	3.4186	0.00022835	0.0012723	0.438036	59	3	3.4186
Lsm14b	4	0.2165	0.49729	1	8130	1	5.1217	0.00024756	0.0014323	0.462871	60	3	5.1217
Gtf2h5	4	0.99974	0.99907	1	19630	0	4.467	0.00026249	0.0014731	0.462871	61	4	4.467
Olfr648	4	0.99937	0.99808	1	19614	0	5.5544	0.00027089	0.0014735	0.462871	62	4	5.5544
Crat	4	0.34135	0.59727	1	10895	2	0.92701	0.00027242	0.0014951	0.462871	63	2	0.92701
Papd7	4	0.99972	0.99905	1	19629	0	3.9441	0.00027898	0.0014956	0.462871	64	4	3.9441
Qdpr	4	0.12059	0.38003	1	5620	3	-3.8357	0.00027909	0.0014956	0.462871	65	1	-3.8357
Phox2a	4	0.99971	0.999	1	19628	0	4.2752	0.00029327	0.001568	0.462871	66	4	4.2752
Usp32	4	0.6996	0.79038	1	15770	1	4.0731	0.00029418	0.0015684	0.462871	67	3	4.0731
Shisa7	4	0.75335	0.80308	1	16136	1	5.695	0.00029588	0.0015684	0.462871	68	3	5.695
Fmnl1	4	0.60055	0.73931	1	14449	1	4.9152	0.00029614	0.0015684	0.462871	69	3	4.9152
Ahcyl2	4	0.9997	0.999	1	19627	0	3.4636	0.00030469	0.001648	0.47304	70	4	3.4636
Cadps2	4	0.98642	0.96473	1	19221	0	5.1404	0.00032096	0.001694	0.47304	71	4	5.1404
Il1a	4	0.99968	0.999	1	19626	0	3.5999	0.00032288	0.001694	0.47304	72	4	3.5999
Taf8	4	0.78191	0.81658	1	16360	1	4.2322	0.00032448	0.0016945	0.47304	73	2	4.2322
Zfx	4	0.99464	0.98554	1	19461	0	4.9989	0.00035831	0.0018857	0.518564	74	4	4.9989
Hhex	4	0.99214	0.97841	1	19391	0	4.9199	0.0003652	0.0019078	0.518564	75	4	4.9199
S100pbp	3	0.99961	0.99905	1	19625	0	5.0876	0.00038512	0.0011285	0.40898	76	3	5.0876
Bbc3	4	0.99961	0.99881	1	19624	0	3.5791	0.00038847	0.0020621	0.550116	77	4	3.5791
Trp53	4	0.99934	0.99804	1	19613	0	5.1502	0.00039396	0.0021201	0.550116	78	4	5.1502
Tfap4	4	0.91614	0.87453	1	17848	1	5.5563	0.00040322	0.0021565	0.550116	79	3	5.5563
Itga8	4	0.9996	0.9988	1	19623	0	4.7732	0.00040473	0.0021565	0.550116	80	4	4.7732
Gm17296	4	0.99959	0.9988	1	19622	0	4.5161	0.00041261	0.002157	0.550116	81	4	4.5161
Kcnq3	4	0.99958	0.99875	1	19621	0	4.1895	0.00041881	0.002216	0.558259	82	4	4.1895
Usp18	4	0.45618	0.66074	1	12496	1	5.5153	0.00042918	0.002297	0.565114	83	3	5.5153
Cldn23	4	0.57245	0.72833	1	14096	1	1.0281	0.0004313	0.0023252	0.565114	84	2	1.0281
Mbtd1	4	0.99957	0.99863	1	19620	0	4.4709	0.00043265	0.0023252	0.565114	85	4	4.4709
Cdkn2a	4	0.99954	0.99861	1	19619	0	3.2098	0.00046263	0.0024345	0.584792	86	4	3.2098
Gucy1a3	4	0.79444	0.82043	1	16452	1	5.3416	0.00047365	0.002561	0.608114	87	3	5.3416
Zscan22	4	0.97841	0.95058	1	19023	0	1.3278	0.00048203	0.0027302	0.64092	88	4	1.3278
Cyb5r2	4	0.86348	0.8484	1	17170	1	5.2793	0.00049828	0.0027614	0.64095	89	3	5.2793
1700011L22Rik	4	0.40609	0.63828	1	11791	2	-2.9563	0.00053276	0.0028438	0.645577	90	1	-2.9563
Cwc27	4	0.99945	0.99839	1	19618	0	3.929	0.00054783	0.0029133	0.647237	91	4	3.929
Zhx1	4	0.99944	0.99839	1	19617	0	4.1022	0.00055514	0.0029138	0.647237	92	4	4.1022
Tsta3	4	0.9975	0.99262	1	19543	0	5.5048	0.00055622	0.003002	0.659732	93	4	5.5048
Car14	4	0.20347	0.48767	1	7792	3	-5.2847	0.00058349	0.0031127	0.676863	94	1	-5.2847
Fam117b	4	0.9994	0.99819	1	19616	0	3.1812	0.0005976	0.0032742	0.680826	95	4	3.1812
Khdrbs1	4	0.98742	0.96698	1	19250	0	4.8227	0.00059998	0.0032742	0.680826	96	4	4.8227
Sppl3	4	0.9994	0.99819	1	19615	0	4.6526	0.00060305	0.0032742	0.680826	97	4	4.6526
Ogfod1	4	0.10031	0.34706	1	5005	2	1.2676	0.00062425	0.003383	0.680826	98	2	1.2676
Icam1	4	0.99479	0.9862	1	19466	0	6.0209	0.00063193	0.0033835	0.680826	99	4	6.0209
Myo1b	4	0.075438	0.29378	1	4253	2	2.3745	0.00064587	0.0034333	0.680826	100	2	2.3745
Prdm14	4	0.99934	0.99804	1	19612	0	4.4048	0.00066381	0.003475	0.680826	101	4	4.4048
Pet2	4	0.999	0.99715	1	19598	0	4.9206	0.0006692	0.003475	0.680826	102	4	4.9206
Rxfp4	4	0.19982	0.47797	1	7701	1	2.0209	0.00068494	0.0035143	0.680826	103	2	2.0209
Vsnl1	4	0.40257	0.63661	1	11731	1	5.4274	0.00069505	0.0035397	0.680826	104	3	5.4274
Notch4	4	0.99883	0.99661	1	19596	0	5.5067	0.00070019	0.0035402	0.680826	105	4	5.5067
Pate2	4	0.97477	0.94534	1	18924	0	4.5177	0.00070576	0.0035728	0.680826	106	4	4.5177
Man1c1	4	0.99913	0.9976	1	19604	0	4.9053	0.00073069	0.0036504	0.680826	107	4	4.9053
Otud6b	4	0.057741	0.26254	1	3560	3	-5.1724	0.00073566	0.0036907	0.680826	108	1	-5.1724
Vip	4	0.99926	0.99785	1	19611	0	3.062	0.00073571	0.0036907	0.680826	109	4	3.062
Rragc	4	0.99926	0.99785	1	19610	0	3.9735	0.00074083	0.0036912	0.680826	110	4	3.9735
Pald1	4	0.98914	0.97153	1	19301	0	4.4387	0.00074409	0.0036912	0.680826	111	4	4.4387
Aspm	4	0.96306	0.91517	1	18670	0	5.7579	0.00075103	0.0037338	0.682599	112	3	5.7579
Gm14743	4	0.99923	0.99776	1	19609	0	4.1247	0.00076949	0.0038824	0.703535	113	4	4.1247
Slc10a4	4	0.27134	0.54223	1	9520	1	4.6661	0.00078077	0.003974	0.707793	114	3	4.6661
Suclg2	4	0.94974	0.89813	1	18436	0	1.9382	0.00078638	0.0039744	0.707793	115	3	1.9382
Ssr2	4	0.9992	0.99773	1	19608	0	3.3288	0.00079633	0.004054	0.715791	116	4	3.3288
Ccdc115	4	0.33577	0.59177	1	10829	2	0.53803	0.0008074	0.0040919	0.716353	117	2	0.53803
Myh1	4	0.98895	0.97064	1	19293	0	4.6869	0.00080842	0.0041561	0.720336	118	4	4.6869
Brk1	4	0.99918	0.99765	1	19607	0	3.3824	0.00082485	0.0043186	0.720336	119	4	3.3824
Abca15	4	0.22689	0.50467	1	8379	1	5.2309	0.0008284	0.0043186	0.720336	120	3	5.2309
Nufip2	4	0.99917	0.99765	1	19606	0	4.0001	0.0008303	0.004319	0.720336	121	4	4.0001
Trpm2	4	0.083501	0.31136	1	4495	2	-3.2622	0.0008371	0.0043603	0.720336	122	2	-3.2622
Dennd4b	4	0.99915	0.9976	1	19605	0	3.3093	0.00084983	0.0044192	0.720336	123	4	3.3093
Taf2	3	0.87487	0.8097	1	17300	1	-1.6794	0.00085615	0.0028409	0.645577	124	2	-1.6794
Fhl4	4	0.54396	0.7145	1	13695	1	3.8011	0.0008766	0.0044628	0.720336	125	3	3.8011
Psd4	4	0.99912	0.99756	1	19603	0	4.5451	0.00087952	0.0044628	0.720336	126	4	4.5451
Gsc2	4	0.54939	0.71791	1	13773	1	4.1937	0.0008948	0.0044633	0.720336	127	3	4.1937
Gm10352	4	0.99267	0.9799	1	19405	0	4.7043	0.00089572	0.0044633	0.720336	128	4	4.7043
Olfr699	4	0.99909	0.99746	1	19602	0	4.6512	0.00091077	0.0045515	0.728874	129	4	4.6512
Zfp111	4	0.99909	0.99746	1	19601	0	3.1095	0.00091423	0.0046186	0.732494	130	4	3.1095
Smim3	4	0.29835	0.57102	1	10197	1	4.5419	0.00091873	0.0046612	0.732494	131	3	4.5419
Olfr1250	4	0.10321	0.34997	1	5095	1	5.1768	0.00092929	0.0047538	0.732494	132	3	5.1768
Wdr63	4	0.99907	0.99738	1	19600	0	3.0258	0.00093035	0.0047538	0.732494	133	4	3.0258
Tnfrsf13b	4	0.99391	0.98316	1	19440	0	4.2616	0.00093711	0.0047542	0.732494	134	4	4.2616
Smagp	4	0.57739	0.72986	1	14171	1	4.536	0.00095993	0.0048927	0.732494	135	3	4.536
Camk2a	4	0.99904	0.9973	1	19599	0	3.2632	0.00096321	0.0048927	0.732494	136	4	3.2632
Proc	4	0.67727	0.77864	1	15529	1	4.7419	0.00096942	0.0048932	0.732494	137	3	4.7419
Capn9	4	0.99642	0.98991	1	19507	0	4.497	0.00097283	0.0048932	0.732494	138	4	4.497
Camta1	4	0.43793	0.65236	1	12229	2	-3.6926	0.00098924	0.0051827	0.764745	139	2	-3.6926
Enho	4	0.99618	0.98925	1	19498	0	4.4732	0.0010195	0.0053548	0.773627	140	4	4.4732
Ccdc110	4	0.53782	0.70951	1	13618	2	-4.2326	0.00104	0.0053552	0.773627	141	1	-4.2326
Nlgn2	4	0.99895	0.9971	1	19597	0	4.0585	0.0010465	0.0053552	0.773627	142	4	4.0585
Prss34	4	0.73372	0.79956	1	15990	1	4.3426	0.0010736	0.005545	0.787937	143	3	4.3426
Myadm	4	0.1672	0.44015	1	6865	2	1.0596	0.0010889	0.0056069	0.787937	144	2	1.0596
Ceacam18	4	0.96492	0.92046	1	18702	0	5.3336	0.0010902	0.0056069	0.787937	145	3	5.3336
Ythdf1	4	0.99812	0.99446	1	19563	0	4.6807	0.0010907	0.0056069	0.787937	146	4	4.6807
Ist1	4	0.99624	0.98939	1	19501	0	4.769	0.001102	0.0057761	0.806228	147	4	4.769
Dpf3	4	0.99621	0.98939	1	19499	0	4.855	0.0011526	0.0058916	0.814759	148	4	4.855
Zic2	4	0.99685	0.99104	1	19522	0	5.0308	0.0011897	0.0059548	0.814759	149	4	5.0308
Pfkl	4	0.98083	0.95471	1	19081	0	4.7297	0.0011948	0.0059999	0.814759	150	4	4.7297
Htr6	4	0.66368	0.77042	1	15335	1	2.828	0.0012087	0.0061882	0.814759	151	2	2.828
Nsun2	4	0.9987	0.9962	1	19591	0	5.5365	0.0012215	0.0061887	0.814759	152	4	5.5365
Olfr867	4	0.99878	0.99643	1	19594	0	4.4299	0.0012216	0.0061887	0.814759	153	4	4.4299
Wdr37	4	0.99878	0.99643	1	19593	0	3.2779	0.0012226	0.0061887	0.814759	154	4	3.2779
Lmod2	4	0.79819	0.82274	1	16487	1	4.2867	0.0012239	0.0061887	0.814759	155	3	4.2867
Pgp	4	0.84808	0.84291	1	16997	1	4.0977	0.0012322	0.0062429	0.814759	156	3	4.0977
Epyc	4	0.99876	0.99637	1	19592	0	3.9619	0.0012403	0.00631	0.814759	157	4	3.9619
Atp8b2	4	0.0057158	0.061432	1	446	3	-7.1472	0.0012428	0.00631	0.814759	158	1	-7.1472
Abcb11	4	0.70839	0.79266	1	15824	1	4.3531	0.0012623	0.0063105	0.814759	159	3	4.3531
Brsk1	4	0.83008	0.82975	1	16828	1	4.3048	0.0012884	0.006935	0.878971	160	3	4.3048
Scube3	4	0.01817	0.13593	1	1269	1	5.112	0.0012935	0.0069354	0.878971	161	3	5.112
Taar8c	4	0.99799	0.99405	1	19557	0	4.5612	0.0012972	0.0069354	0.878971	162	4	4.5612
Dsc2	4	0.14129	0.40538	1	6184	1	4.51	0.001321	0.0072206	0.889947	163	3	4.51
Cblb	4	0.25626	0.53027	1	9147	2	0.17874	0.0013281	0.0072211	0.889947	164	2	0.17874
Defa26	4	0.99867	0.99601	1	19590	0	3.0427	0.0013327	0.00728	0.889947	165	4	3.0427
Mum1l1	4	0.68679	0.78188	1	15686	1	4.0365	0.0013429	0.0072805	0.889947	166	3	4.0365
Agtr1a	4	0.1353	0.39718	1	6038	1	2.7648	0.0013442	0.0072805	0.889947	167	2	2.7648
Zfp799	4	0.99865	0.99601	1	19589	0	4.2858	0.0013462	0.0072805	0.889947	168	4	4.2858
Cep250	4	0.99863	0.99594	1	19587	0	3.3549	0.0013677	0.0074876	0.896113	169	4	3.3549
AY074887	4	0.99752	0.99272	1	19545	0	5.241	0.0013678	0.0074876	0.896113	170	4	5.241
Sema3e	4	0.2578	0.53027	1	9179	2	0.075443	0.0013949	0.0078259	0.896113	171	2	0.075443
Nfe2l1	4	0.92543	0.88145	1	17994	1	5.1846	0.0014018	0.0078259	0.896113	172	3	5.1846
Tspan33	4	0.9986	0.99589	1	19586	0	3.9579	0.0014038	0.0078259	0.896113	173	4	3.9579
Ltbp4	4	0.99857	0.99588	1	19585	0	3.4231	0.0014334	0.0078264	0.896113	174	4	3.4231
Sorcs3	4	0.99591	0.98897	1	19491	0	4.7447	0.0014348	0.0078264	0.896113	175	4	4.7447
Mmp11	4	0.89074	0.86296	1	17502	1	4.7737	0.001443	0.0079141	0.896113	176	3	4.7737
Kcnk7	4	0.032408	0.20617	1	2124	2	-2.5163	0.0014456	0.0079141	0.896113	177	2	-2.5163
Pcdhga7	4	0.99855	0.99588	1	19584	0	3.5404	0.0014541	0.0079146	0.896113	178	4	3.5404
C2cd5	4	0.99853	0.99575	1	19583	0	3.6269	0.0014708	0.0081303	0.896113	179	4	3.6269
Rara	4	0.99851	0.99575	1	19582	0	3.4778	0.0014946	0.0081308	0.896113	180	4	3.4778
Olfm3	4	0.14087	0.40503	1	6171	2	-1.3829	0.0014963	0.0081308	0.896113	181	2	-1.3829
Tmprss6	4	0.9985	0.99575	1	19581	0	2.5626	0.0014973	0.0081308	0.896113	182	4	2.5626
Clint1	4	0.99849	0.99575	1	19580	0	4.0106	0.0015101	0.0081308	0.896113	183	4	4.0106
N4bp2	4	0.98455	0.96174	1	19171	0	4.4309	0.0015208	0.0082827	0.896113	184	4	4.4309
Gm20815	4	0.99847	0.99569	1	19579	0	2.7725	0.0015265	0.0082832	0.896113	185	4	2.7725
Eif2a	4	0.9981	0.9943	1	19561	0	4.567	0.001527	0.0082832	0.896113	186	4	4.567
Foxk2	4	0.05189	0.24967	1	3250	1	4.6629	0.0015332	0.0084078	0.896113	187	3	4.6629
Olfr135	4	0.70643	0.79266	1	15817	1	4.9652	0.0015352	0.0084078	0.896113	188	3	4.9652
Acot2	4	0.99846	0.99556	1	19578	0	3.1643	0.0015395	0.0084083	0.896113	189	4	3.1643
Hist2h4	4	0.91107	0.87221	1	17771	1	4.1581	0.0015425	0.0084797	0.896113	190	3	4.1581
Gbp3	4	0.16341	0.43754	1	6770	3	-4.1252	0.001547	0.0084802	0.896113	191	1	-4.1252
Ss18	4	0.99845	0.99548	1	19577	0	3.8132	0.0015509	0.0084802	0.896113	192	4	3.8132
Mpp5	4	0.99843	0.99527	1	19576	0	3.1275	0.0015656	0.008762	0.896113	193	4	3.1275
Reg2	4	0.99843	0.99527	1	19575	0	3.1389	0.0015704	0.008762	0.896113	194	4	3.1389
Tle2	4	0.81673	0.82666	1	16688	1	4.9322	0.0015816	0.008762	0.896113	195	3	4.9322
Lrrc4c	4	0.99842	0.99527	1	19574	0	3.4623	0.0015829	0.008762	0.896113	196	4	3.4623
Cdc42	4	0.99785	0.99385	1	19553	0	5.1154	0.0015942	0.0087625	0.896113	197	4	5.1154
Stx8	4	0.67503	0.77727	1	15496	2	0.71231	0.0015976	0.0087625	0.896113	198	2	0.71231
Stx12	4	0.9984	0.99527	1	19573	0	2.9155	0.0015995	0.0087625	0.896113	199	4	2.9155
Cntf	4	0.55781	0.72259	1	13884	1	4.1938	0.0016237	0.0089791	0.913744	200	3	4.1938
Myoz2	4	0.96886	0.92955	1	18782	0	4.2555	0.0016617	0.0094421	0.942588	201	3	4.2555
Zpld1	4	0.99834	0.99504	1	19572	0	2.7337	0.0016633	0.0094421	0.942588	202	4	2.7337
3110002H16Rik	4	0.99833	0.99504	1	19571	0	3.8555	0.0016713	0.0094426	0.942588	203	4	3.8555
Gpatch8	4	0.86304	0.8484	1	17164	1	4.5892	0.0016789	0.0096271	0.942588	204	3	4.5892
Zcchc2	4	0.98952	0.97208	1	19313	0	4.4393	0.0016871	0.0096271	0.942588	205	4	4.4393
Defb43	4	0.93616	0.89019	1	18174	1	3.3799	0.0016989	0.0096276	0.942588	206	3	3.3799
Kcnh4	4	0.12408	0.38398	1	5710	3	-4.4899	0.001699	0.0096276	0.942588	207	1	-4.4899
Fam216b	4	0.043009	0.22819	1	2751	1	4.3741	0.0017011	0.0096276	0.942588	208	3	4.3741
Nabp2	4	0.99829	0.99496	1	19570	0	4.2473	0.0017123	0.0099089	0.96107	209	4	4.2473
Rp2h	4	0.96466	0.91893	1	18699	0	4.6817	0.0017244	0.0099094	0.96107	210	3	4.6817
Anapc13	4	0.98757	0.96698	1	19255	0	4.584	0.0017436	0.010015	0.962264	211	4	4.584
Spryd7	4	0.99825	0.99496	1	19569	0	2.8951	0.001745	0.010015	0.962264	212	4	2.8951
Zfp273	4	0.039264	0.2203	1	2548	3	-5.1734	0.0017497	0.01009	0.962264	213	1	-5.1734
Plagl1	4	0.99825	0.9948	1	19568	0	3.248	0.0017542	0.010168	0.962264	214	4	3.248
Cyb561	4	0.72212	0.79807	1	15912	1	4.0785	0.001758	0.010168	0.962264	215	3	4.0785
Qk	4	0.99821	0.99471	1	19567	0	3.5732	0.0017905	0.010247	0.962264	216	4	3.5732
Smpx	4	0.96766	0.92498	1	18758	0	3.3853	0.0018004	0.010248	0.962264	217	3	3.3853
Olfr211	4	0.99817	0.99454	1	19566	0	3.645	0.0018257	0.01063	0.970406	218	4	3.645
Fstl3	4	0.97977	0.95349	1	19053	0	4.7124	0.0018368	0.01071	0.970406	219	4	4.7124
AI837181	4	0.62457	0.75304	1	14802	2	0.39449	0.0018511	0.01071	0.970406	220	2	0.39449
Fgf20	4	0.99814	0.99446	1	19565	0	2.7746	0.0018616	0.01071	0.970406	221	4	2.7746
Dnajb12	4	0.99813	0.99446	1	19564	0	3.7125	0.0018677	0.01071	0.970406	222	4	3.7125
Taf10	4	0.53632	0.70543	1	13596	2	0.60804	0.0018681	0.01071	0.970406	223	2	0.60804
Erf	4	0.20099	0.48127	1	7731	2	0.14055	0.0018759	0.01071	0.970406	224	2	0.14055
Lcp1	4	0.99812	0.99446	1	19562	0	2.6702	0.0018833	0.01071	0.970406	225	4	2.6702
Hras	4	0.98542	0.96343	1	19188	0	4.83	0.0019103	0.011175	0.993309	226	4	4.83
Scrn1	4	0.99809	0.9943	1	19560	0	3.0518	0.0019128	0.011175	0.993309	227	4	3.0518
Ap2a1	4	0.12248	0.38398	1	5665	2	-0.26042	0.0019315	0.011355	0.993309	228	2	-0.26042
Add1	4	0.99441	0.98392	1	19454	0	3.1454	0.0019524	0.011355	0.993309	229	4	3.1454
Tbx10	4	0.93956	0.89134	1	18241	0	3.5947	0.0019529	0.011355	0.993309	230	3	3.5947
Stx2	4	0.99801	0.99421	1	19559	0	2.8547	0.0019863	0.011459	0.993309	231	4	2.8547
Ctdspl2	4	0.97765	0.94928	1	19002	0	4.7179	0.0019931	0.011459	0.993309	232	4	4.7179
Sik3	4	0.998	0.99405	1	19558	0	3.6726	0.0020026	0.01184	0.993309	233	4	3.6726
Pcmt1	4	0.43125	0.65006	1	12146	2	-1.5819	0.0020031	0.01184	0.993309	234	2	-1.5819
Klrc3	4	0.047836	0.23656	1	3022	1	4.4036	0.0020087	0.011841	0.993309	235	3	4.4036
Pdilt	4	0.98563	0.96377	1	19195	0	5.1062	0.002017	0.011944	0.993309	236	4	5.1062
Senp5	4	0.99798	0.99405	1	19556	0	3.6438	0.002018	0.011944	0.993309	237	4	3.6438
Laptm4a	4	0.50586	0.6901	1	13188	1	4.3444	0.0020189	0.011944	0.993309	238	3	4.3444
Cdh4	4	0.89686	0.86531	1	17585	1	2.5248	0.0020538	0.011944	0.993309	239	3	2.5248
Dlg4	4	0.86947	0.85306	1	17237	1	3.0902	0.0021044	0.012241	0.993309	240	3	3.0902
Dennd6a	3	0.99788	0.99454	1	19555	0	3.7417	0.0021239	0.0073352	0.891351	241	3	3.7417
Lrrfip1	4	0.99787	0.99385	1	19554	0	3.8383	0.0021269	0.012242	0.993309	242	4	3.8383
Meiob	4	0.43538	0.65236	1	12195	1	4.4195	0.0021357	0.012242	0.993309	243	3	4.4195
Sptlc1	4	0.12117	0.3826	1	5634	1	3.0273	0.0021421	0.012242	0.993309	244	2	3.0273
Pkhd1	4	0.099859	0.34706	1	4986	3	-4.9528	0.0021551	0.012242	0.993309	245	1	-4.9528
Proz	4	0.66661	0.77202	1	15375	1	4.0891	0.0021714	0.012407	0.993309	246	3	4.0891
Pphln1	4	0.99781	0.99358	1	19552	0	3.5785	0.0021863	0.012486	0.993309	247	4	3.5785
Shprh	4	0.054058	0.25589	1	3366	1	4.9963	0.0021985	0.012565	0.993309	248	3	4.9963
Irf4	4	0.9978	0.9935	1	19551	0	2.487	0.0021997	0.012565	0.993309	249	4	2.487
Nono	4	0.049172	0.23854	1	3097	3	-5.3523	0.0022058	0.012565	0.993309	250	1	-5.3523
Ldah	4	0.99098	0.97552	1	19353	0	4.2516	0.0022251	0.012651	0.993309	251	4	4.2516
Fam217a	4	0.41414	0.64507	1	11911	2	0.22038	0.0022356	0.01274	0.993309	252	2	0.22038
Syt17	3	0.99776	0.99433	1	19550	0	3.4455	0.0022365	0.0078312	0.896113	253	3	3.4455
Bmp8b	4	0.81953	0.82704	1	16723	1	4.1251	0.0022439	0.01274	0.993309	254	3	4.1251
Foxk1	4	0.58763	0.7338	1	14290	2	-0.26567	0.0022564	0.012741	0.993309	255	2	-0.26567
1110032F04Rik	4	0.21055	0.49081	1	7965	1	4.6427	0.0022657	0.012822	0.993309	256	3	4.6427
Ifna1	4	0.44199	0.65458	1	12288	1	3.9104	0.0022757	0.012822	0.993309	257	3	3.9104
Slc40a1	4	0.9977	0.99322	1	19549	0	2.8858	0.0023014	0.012823	0.993309	258	4	2.8858
Tmed7	4	0.19871	0.47553	1	7680	2	-3.4068	0.0023071	0.012823	0.993309	259	1	-3.4068
2700097O09Rik	4	0.039715	0.22042	1	2575	1	4.2266	0.0023164	0.012823	0.993309	260	3	4.2266
Pkd1l2	4	0.54203	0.71288	1	13667	1	3.4228	0.0023281	0.01293	0.993309	261	3	3.4228
Tex14	4	0.99612	0.98925	1	19496	0	4.0206	0.0023464	0.01302	0.993309	262	4	4.0206
Pnp	4	0.99765	0.99312	1	19548	0	2.6636	0.0023503	0.013126	0.993309	263	4	2.6636
Cyp26b1	4	0.30803	0.57953	1	10427	1	2.2245	0.0023577	0.013126	0.993309	264	3	2.2245
Gm3488	4	0.97834	0.95058	1	19017	0	5.0779	0.0023853	0.013127	0.993309	265	4	5.0779
Tpt1	4	0.99761	0.99312	1	19547	0	3.328	0.0023901	0.013127	0.993309	266	4	3.328
Smad2	4	0.99761	0.99312	1	19546	0	3.9705	0.0023939	0.013127	0.993309	267	4	3.9705
Zscan4f	4	0.37624	0.61547	1	11377	2	0.24321	0.0023986	0.013127	0.993309	268	2	0.24321
Cyp26a1	4	0.74521	0.80112	1	16061	1	2.8267	0.0024016	0.013127	0.993309	269	2	2.8267
Sparc	4	0.37531	0.61547	1	11358	1	0.27238	0.0024084	0.013251	0.999042	270	2	0.27238
Uchl5	4	0.81642	0.82666	1	16683	1	4.186	0.0024226	0.013348	1	271	3	4.186
Usp51	4	0.68317	0.77979	1	15618	2	-0.11907	0.0024591	0.013434	1	272	2	-0.11907
Anapc7	4	0.95804	0.90526	1	18576	0	3.9498	0.0024592	0.013434	1	273	3	3.9498
Tmem91	4	0.99752	0.99272	1	19544	0	3.4162	0.0024842	0.013619	1	274	4	3.4162
Tmem11	4	0.39483	0.62954	1	11620	2	-4.2281	0.0025097	0.013838	1	275	1	-4.2281
Klhl14	4	0.58265	0.73231	1	14231	2	0.71857	0.0025246	0.013932	1	276	2	0.71857
Cdca2	4	0.99745	0.99252	1	19542	0	3.8265	0.0025526	0.014197	1	277	4	3.8265
Rbfox2	4	0.82752	0.82895	1	16803	1	4.2999	0.0025594	0.014197	1	278	3	4.2999
Sema5b	4	0.8591	0.84528	1	17114	1	1.5437	0.0025604	0.014197	1	279	3	1.5437
Arl11	4	0.99743	0.99252	1	19541	0	3.3804	0.0025688	0.014197	1	280	4	3.3804
Igfbp7	4	0.92517	0.88145	1	17990	1	3.7106	0.0025821	0.014434	1	281	3	3.7106
Arhgap4	4	0.91627	0.87453	1	17851	1	4.4303	0.0026039	0.014434	1	282	3	4.4303
Crocc	4	0.35182	0.60092	1	11036	2	0.22442	0.0026165	0.014434	1	283	2	0.22442
Fam193b	4	0.99738	0.99242	1	19540	0	2.8407	0.0026237	0.014434	1	284	4	2.8407
Tyro3	4	0.99627	0.98939	1	19503	0	4.2544	0.0026258	0.014434	1	285	4	4.2544
Serpina1b	4	0.99736	0.99242	1	19539	0	2.5903	0.002636	0.014434	1	286	4	2.5903
Setd1b	4	0.9886	0.96944	1	19288	0	4.1328	0.0026577	0.01467	1	287	4	4.1328
Hspa2	4	0.44936	0.65905	1	12408	2	-0.92331	0.0026617	0.01467	1	288	2	-0.92331
Bmp5	4	0.90215	0.86683	1	17654	1	4.818	0.0026643	0.01467	1	289	3	4.818
Tle1	4	0.93192	0.88449	1	18096	1	3.9511	0.0026699	0.01467	1	290	3	3.9511
Net1	4	0.97362	0.94245	1	18896	0	3.9198	0.0026974	0.014951	1	291	4	3.9198
Wnt2b	4	0.57378	0.72833	1	14112	1	3.736	0.00271	0.014951	1	292	3	3.736
Plac9b	4	0.66014	0.77042	1	15280	1	2.6768	0.0027123	0.015051	1	293	3	2.6768
Olfr1423	4	0.99703	0.99129	1	19528	0	4.1097	0.0027201	0.015052	1	294	4	4.1097
Olfr1196	4	0.99728	0.99209	1	19538	0	3.2011	0.0027215	0.015052	1	295	4	3.2011
Hnrnpm	4	0.75102	0.80269	1	16110	1	3.701	0.0027447	0.015271	1	296	3	3.701
Ptpn5	4	0.10044	0.34706	1	5010	2	-2.07	0.002763	0.01538	1	297	2	-2.07
Stx6	4	0.9972	0.99186	1	19537	0	2.8603	0.0028003	0.01555	1	298	4	2.8603
Lrrc8d	4	0.99719	0.99186	1	19536	0	4.0957	0.0028059	0.01555	1	299	4	4.0957
Dab1	4	0.42295	0.64675	1	12036	2	-0.62145	0.0028136	0.015655	1	300	2	-0.62145
Cadm4	4	0.99718	0.99175	1	19535	0	3.2575	0.0028208	0.015655	1	301	4	3.2575
Sprr2a1	4	0.99717	0.99175	1	19534	0	2.6093	0.0028345	0.015656	1	302	4	2.6093
Tll2	4	0.99716	0.99175	1	19533	0	2.6337	0.0028401	0.015656	1	303	4	2.6337
Plgrkt	4	0.99477	0.9862	1	19465	0	3.9625	0.002843	0.015656	1	304	4	3.9625
Rrh	4	0.14039	0.40466	1	6160	3	-5.7042	0.0028642	0.015854	1	305	1	-5.7042
Fxr1	4	0.92861	0.88373	1	18044	1	4.6362	0.0028872	0.015959	1	306	3	4.6362
Alg3	4	0.99709	0.99141	1	19532	0	3.7127	0.0029075	0.01596	1	307	4	3.7127
Ctbp2	4	0.99709	0.99141	1	19531	0	3.0782	0.00291	0.01596	1	308	4	3.0782
Yipf7	4	0.82689	0.82895	1	16796	1	3.0285	0.0029149	0.016078	1	309	3	3.0285
Tead2	4	0.5852	0.7329	1	14254	1	3.478	0.0029213	0.016078	1	310	3	3.478
Appl2	4	0.99706	0.99129	1	19530	0	2.5145	0.0029387	0.016079	1	311	4	2.5145
Cd5	4	0.99705	0.99129	1	19529	0	2.8278	0.0029522	0.016079	1	312	4	2.8278
Tmem106c	4	0.89187	0.86296	1	17520	1	3.8582	0.0029655	0.016207	1	313	3	3.8582
Spaca1	4	0.54602	0.71508	1	13719	1	1.4584	0.0030162	0.01639	1	314	3	1.4584
Rbpjl	4	0.99698	0.99129	1	19527	0	4.0919	0.0030229	0.01639	1	315	4	4.0919
Ifi27l2b	4	0.99697	0.99129	1	19526	0	2.8902	0.0030327	0.01639	1	316	4	2.8902
Xkr5	4	0.98686	0.96601	1	19234	0	4.2848	0.0030364	0.016531	1	317	4	4.2848
Mill1	4	0.30803	0.57953	1	10423	1	3.976	0.0030535	0.016532	1	318	3	3.976
Klhl34	4	0.44797	0.65797	1	12385	2	-2.5983	0.0030668	0.016649	1	319	1	-2.5983
Abhd12	4	0.0076411	0.073116	1	569	1	4.0619	0.0030668	0.016649	1	320	3	4.0619
Olfr810	4	0.97634	0.94754	1	18966	0	3.5488	0.0030797	0.016786	1	321	4	3.5488
Lrig2	4	0.9969	0.99116	1	19525	0	3.1192	0.0030982	0.016923	1	322	4	3.1192
Pafah1b3	4	0.99688	0.99104	1	19524	0	2.4502	0.0031169	0.01721	1	323	4	2.4502
Asz1	4	0.10096	0.34742	1	5029	2	-0.17456	0.0031174	0.01721	1	324	2	-0.17456
Ptch1	4	0.85807	0.84488	1	17103	1	3.9815	0.0031279	0.01721	1	325	3	3.9815
Fbxo11	4	0.99687	0.99104	1	19523	0	3.6541	0.0031283	0.01721	1	326	4	3.6541
Ptch2	4	0.99684	0.99104	1	19521	0	2.4829	0.003164	0.017424	1	327	4	2.4829
Zbtb10	4	0.99683	0.99104	1	19520	0	3.129	0.0031674	0.017424	1	328	4	3.129
Olfr872	4	0.63008	0.7576	1	14873	2	-1.3117	0.0031681	0.017424	1	329	2	-1.3117
Syngr4	4	0.3117	0.58117	1	10515	1	4.3167	0.0031786	0.017424	1	330	3	4.3167
Fgf8	3	0.99085	0.97916	1	19348	0	5.2661	0.0031866	0.010833	0.97728	331	3	5.2661
Dkk2	4	0.83699	0.83512	1	16892	1	4.2701	0.0032085	0.017544	1	332	3	4.2701
Gm94	4	0.31661	0.58302	1	10594	1	4.3434	0.0032109	0.017544	1	333	3	4.3434
Enkur	4	0.30673	0.57916	1	10395	3	-4.2329	0.0032187	0.017544	1	334	1	-4.2329
Ube2l6	4	0.99674	0.99091	1	19519	0	2.8735	0.003264	0.017544	1	335	4	2.8735
Pld5	4	0.99673	0.99091	1	19518	0	2.7556	0.0032668	0.017544	1	336	4	2.7556
Cask	4	0.047836	0.23656	1	3021	2	-2.961	0.0032693	0.017544	1	337	2	-2.961
Prkg2	4	0.99672	0.99091	1	19517	0	3.0023	0.0032751	0.017544	1	338	4	3.0023
Wdr90	4	0.99671	0.99067	1	19516	0	2.9003	0.0032877	0.017763	1	339	4	2.9003
Mtf2	4	0.99671	0.99056	1	19515	0	3.7443	0.0032939	0.017867	1	340	4	3.7443
Sirt5	4	0.01862	0.13901	1	1300	1	4.3121	0.0033069	0.017868	1	341	3	4.3121
Atp13a3	4	0.18087	0.45514	1	7240	2	0.0092149	0.0033215	0.017989	1	342	2	0.0092149
Scyl2	4	0.99668	0.99043	1	19514	0	2.4292	0.0033226	0.017989	1	343	4	2.4292
Lyplal1	4	0.99667	0.9903	1	19513	0	2.8758	0.0033283	0.018115	1	344	4	2.8758
Ifna2	4	0.99666	0.9903	1	19512	0	2.6691	0.0033445	0.018252	1	345	4	2.6691
Slc6a12	4	0.79669	0.82274	1	16479	1	5.6801	0.0033684	0.018252	1	346	3	5.6801
Vmn1r219	4	0.052889	0.25247	1	3305	3	-4.6767	0.0033706	0.018252	1	347	1	-4.6767
Gm590	4	0.7697	0.80961	1	16272	1	2.8912	0.0033878	0.018483	1	348	2	2.8912
Tnf	4	0.99659	0.99005	1	19511	0	3.2442	0.0034056	0.018616	1	349	4	3.2442
Cygb	4	0.99659	0.99005	1	19510	0	3.0804	0.0034077	0.018616	1	350	4	3.0804
Slc8b1	4	0.12658	0.38789	1	5785	2	-0.96825	0.0034212	0.018743	1	351	2	-0.96825
Pdcd1lg2	4	0.49049	0.68254	1	12962	2	0.75454	0.0034334	0.018743	1	352	2	0.75454
Igf1r	4	0.99653	0.99005	1	19509	0	2.8035	0.0034653	0.018743	1	353	4	2.8035
Pla2g2e	4	0.99652	0.99005	1	19508	0	3.5454	0.0034784	0.018743	1	354	4	3.5454
Rnf150	4	0.5456	0.71508	1	13715	1	3.3782	0.0035114	0.018743	1	355	3	3.3782
Gykl1	4	0.41772	0.64507	1	11971	1	0.74666	0.0035224	0.018866	1	356	2	0.74666
Gmds	4	0.98101	0.9551	1	19086	0	3.7189	0.0035268	0.019004	1	357	4	3.7189
4933402J07Rik	4	0.97836	0.95058	1	19018	0	3.3072	0.0035471	0.019147	1	358	4	3.3072
S1pr4	4	0.0061518	0.064742	1	477	2	0.43731	0.0036118	0.0195	1	359	2	0.43731
Hepacam	4	0.80269	0.8243	1	16536	1	3.9231	0.0036395	0.019728	1	360	3	3.9231
Olfr220	4	0.37141	0.61297	1	11308	2	-0.52134	0.0036742	0.019729	1	361	2	-0.52134
Rbp1	4	0.9938	0.98276	1	19438	0	4.0575	0.0036926	0.019872	1	362	4	4.0575
Ap1b1	3	0.9963	0.99173	1	19506	0	3.4191	0.003697	0.012208	0.993309	363	3	3.4191
Msx1	4	0.49425	0.68317	1	13017	2	0.57398	0.0037026	0.019872	1	364	2	0.57398
Ssh3	4	0.99628	0.98939	1	19504	0	2.8473	0.003723	0.019982	1	365	4	2.8473
Fry	4	0.071599	0.28494	1	4129	3	-4.3943	0.0037249	0.020182	1	366	1	-4.3943
Klhdc3	4	0.99624	0.98939	1	19502	0	3.6092	0.003756	0.020336	1	367	4	3.6092
Ppp1r13l	4	0.96716	0.92319	1	18743	0	3.6937	0.0037601	0.020336	1	368	3	3.6937
Arhgef25	4	0.26492	0.53513	1	9353	3	-5.2695	0.0037755	0.020337	1	369	1	-5.2695
Zglp1	4	0.99622	0.98939	1	19500	0	3.3189	0.0037792	0.020337	1	370	4	3.3189
Olfr609	4	0.03795	0.21742	1	2469	2	0.77268	0.0037798	0.020337	1	371	2	0.77268
Dusp22	4	0.89353	0.86371	1	17539	1	2.4273	0.0038261	0.020864	1	372	3	2.4273
Lrriq4	4	0.99613	0.98925	1	19497	0	2.8342	0.0038662	0.020865	1	373	4	2.8342
Kcna2	4	0.5075	0.6907	1	13214	1	3.5218	0.0038767	0.020865	1	374	3	3.5218
Apol11a	3	0.21128	0.42881	1	7989	2	-2.9141	0.0038963	0.013023	0.993309	375	1	-2.9141
Lipe	4	0.97125	0.93754	1	18835	0	4.3445	0.00392	0.021032	1	376	3	4.3445
Rhoc	4	0.89869	0.86606	1	17610	1	4.3526	0.0039251	0.021032	1	377	3	4.3526
Gm7325	4	0.99319	0.98116	1	19416	0	4.076	0.0039371	0.021032	1	378	4	4.076
Slc44a4	4	0.51192	0.69231	1	13278	1	0.81537	0.0039741	0.021173	1	379	2	0.81537
Tns4	4	0.27703	0.54588	1	9670	2	-1.0027	0.0039779	0.021173	1	380	2	-1.0027
AI464131	4	0.54429	0.7145	1	13701	1	3.9108	0.0039815	0.021173	1	381	3	3.9108
Oprl1	4	0.996	0.98925	1	19495	0	2.799	0.0039972	0.021401	1	382	4	2.799
Ldlr	4	0.40242	0.63661	1	11728	2	1.3291	0.0040044	0.021402	1	383	2	1.3291
Ccdc24	4	0.99531	0.98747	1	19481	0	3.9261	0.0040161	0.021562	1	384	4	3.9261
Gm9573	4	0.99598	0.98925	1	19494	0	2.423	0.0040174	0.021562	1	385	4	2.423
Olfr1189	4	0.63394	0.75848	1	14925	2	0.33748	0.0040285	0.021693	1	386	2	0.33748
Clca1	4	0.99289	0.98011	1	19410	0	3.8386	0.004031	0.021693	1	387	4	3.8386
Paip2b	4	0.99595	0.9891	1	19493	0	2.6302	0.004054	0.021694	1	388	4	2.6302
Ube2ql1	4	0.98968	0.97263	1	19316	0	4.6244	0.0040691	0.021812	1	389	4	4.6244
Slc16a2	4	0.99592	0.98897	1	19492	0	2.7738	0.0040769	0.021812	1	390	4	2.7738
Ceacam3	4	0.97404	0.94347	1	18913	0	3.1819	0.0040791	0.021812	1	391	4	3.1819
Enox1	4	0.96944	0.93064	1	18796	0	3.8929	0.0041049	0.021813	1	392	3	3.8929
Sptbn1	4	0.087675	0.31988	1	4633	1	3.7438	0.0041152	0.021952	1	393	3	3.7438
Gas2l2	4	0.15728	0.43146	1	6604	3	-4.6534	0.0041296	0.022084	1	394	1	-4.6534
Olfr530	4	0.99587	0.98882	1	19490	0	3.9695	0.004132	0.022084	1	395	4	3.9695
Capn7	4	0.99584	0.98882	1	19489	0	3.0842	0.004161	0.022084	1	396	4	3.0842
Acp2	4	0.55568	0.72164	1	13850	1	3.9576	0.0041653	0.022084	1	397	3	3.9576
Taf6	4	0.83224	0.83051	1	16846	1	1.9068	0.0042119	0.022603	1	398	2	1.9068
Gata1	4	0.935	0.88829	1	18153	1	2.7415	0.0042308	0.022603	1	399	3	2.7415
Ctsll3	4	0.54679	0.71508	1	13728	1	4.028	0.0042547	0.022727	1	400	3	4.028
Fam160a1	4	0.99574	0.98853	1	19488	0	3.0675	0.0042583	0.022727	1	401	4	3.0675
Gm19345	4	0.53121	0.70252	1	13519	2	-1.2747	0.0042814	0.023023	1	402	2	-1.2747
Stx11	4	0.8112	0.82666	1	16621	1	3.7908	0.0042816	0.023023	1	403	3	3.7908
Atp6v0d2	4	0.8401	0.83824	1	16920	1	3.1338	0.0043096	0.023177	1	404	3	3.1338
P2rx3	4	0.68466	0.78036	1	15651	1	4.4619	0.0043136	0.023177	1	405	3	4.4619
Usp11	3	0.99567	0.99026	1	19487	0	2.9023	0.0043257	0.014474	1	406	3	2.9023
Scp2d1	4	0.83517	0.83358	1	16871	1	3.6249	0.0043315	0.023177	1	407	3	3.6249
Tagln2	4	0.91122	0.87221	1	17775	1	2.6404	0.004332	0.023177	1	408	3	2.6404
Cox7a2l	4	0.92707	0.88298	1	18019	1	3.905	0.004333	0.023177	1	409	3	3.905
Antxr2	4	0.79204	0.81965	1	16438	1	4.3376	0.0043688	0.023576	1	410	3	4.3376
Tnni1	4	0.25023	0.52442	1	8987	2	-3.4662	0.0043826	0.023576	1	411	1	-3.4662
Rprml	4	0.70209	0.79038	1	15791	1	3.8459	0.0043986	0.023576	1	412	3	3.8459
Zcchc6	4	0.61725	0.75075	1	14688	1	3.5323	0.0044164	0.023576	1	413	3	3.5323
Eef1b2	3	0.95948	0.91883	1	18602	0	5.3921	0.0044232	0.017646	1	414	3	5.3921
Klhl31	4	0.7048	0.79113	1	15809	1	1.1303	0.0044332	0.023576	1	415	3	1.1303
Phldb3	3	0.62041	0.68958	1	14733	1	5.426	0.0044403	0.017646	1	416	2	5.426
Gnb2	4	0.99555	0.98823	1	19485	0	2.8042	0.0044519	0.023576	1	417	4	2.8042
Stab2	4	0.60353	0.74092	1	14496	1	3.4989	0.0044695	0.023829	1	418	3	3.4989
Gem	4	0.35456	0.60331	1	11072	2	-0.73255	0.0044837	0.024132	1	419	2	-0.73255
Hs6st3	4	0.31263	0.58117	1	10539	1	4.1454	0.0044881	0.024132	1	420	3	4.1454
Pamr1	4	0.73937	0.80035	1	16027	1	4.2921	0.0045052	0.024133	1	421	3	4.2921
Phf2	4	0.20876	0.49014	1	7920	1	4.0617	0.0045192	0.024133	1	422	3	4.0617
Ambp	4	0.99547	0.98793	1	19484	0	2.9737	0.0045338	0.024428	1	423	4	2.9737
Lhfp	4	0.16012	0.4352	1	6672	1	2.7078	0.0045343	0.024428	1	424	3	2.7078
Col4a3	4	0.99544	0.98792	1	19483	0	2.5821	0.0045649	0.024696	1	425	4	2.5821
Ostm1	4	0.24308	0.51717	1	8804	1	1.8139	0.0045849	0.024979	1	426	3	1.8139
4933433C11Rik	4	0.56344	0.72474	1	13971	2	1.8278	0.0046134	0.025373	1	427	2	1.8278
Wdr54	4	0.47436	0.67105	1	12730	1	3.6549	0.0046498	0.025374	1	428	3	3.6549
Sostdc1	4	0.99535	0.98747	1	19482	0	2.0026	0.004652	0.025374	1	429	4	2.0026
Skil	4	0.073595	0.29223	1	4194	1	2.2366	0.004686	0.025532	1	430	3	2.2366
Ctdsp1	4	0.88811	0.8615	1	17471	1	4.383	0.0046992	0.025532	1	431	3	4.383
Ggta1	4	0.99142	0.97601	1	19365	0	4.6856	0.0047024	0.025533	1	432	4	4.6856
Olfr1239	4	0.97723	0.94928	1	18985	0	3.1469	0.0047073	0.025533	1	433	4	3.1469
Nelfcd	4	0.56445	0.72474	1	13980	2	-0.63719	0.0047366	0.025533	1	434	2	-0.63719
Olfr1105	4	0.22963	0.50938	1	8449	2	0.15386	0.0047402	0.025533	1	435	2	0.15386
6330416G13Rik	4	0.99525	0.98732	1	19480	0	2.8923	0.0047522	0.025661	1	436	4	2.8923
Olfr1378	4	0.18962	0.46766	1	7446	1	3.2895	0.0047649	0.025661	1	437	3	3.2895
Zfp773	4	0.99522	0.98732	1	19479	0	2.7407	0.004778	0.025661	1	438	4	2.7407
Ing1	4	0.18103	0.45678	1	7245	1	3.8922	0.0047815	0.025661	1	439	3	3.8922
Tmem109	4	0.94	0.89211	1	18250	0	1.6657	0.0047872	0.025662	1	440	2	1.6657
Olfr1388	4	0.099742	0.34706	1	4983	1	4.5536	0.0047909	0.025662	1	441	3	4.5536
Cd63	4	0.99519	0.98732	1	19478	0	2.995	0.0048076	0.025662	1	442	4	2.995
Nkain3	3	0.38485	0.56372	1	11490	1	4.9763	0.0048244	0.018546	1	443	2	4.9763
Gm4340	4	0.67037	0.77337	1	15431	1	2.7546	0.0048377	0.025817	1	444	3	2.7546
Itga5	4	0.99512	0.98698	1	19476	0	2.3414	0.0048802	0.026136	1	445	4	2.3414
Kmt2d	4	0.93227	0.88449	1	18105	1	4.5384	0.0048854	0.026136	1	446	3	4.5384
Sez6	4	0.89283	0.86371	1	17528	1	2.785	0.0048883	0.026315	1	447	3	2.785
Thbs3	4	0.54222	0.71288	1	13670	2	0.26571	0.0048979	0.026316	1	448	2	0.26571
Ccl6	4	0.9951	0.98698	1	19475	0	4.3354	0.0049028	0.026316	1	449	4	4.3354
Pacsin3	4	0.91583	0.87453	1	17844	1	4.063	0.0049104	0.026483	1	450	3	4.063
Olfr1321	4	0.99508	0.98698	1	19474	0	3.058	0.0049188	0.026483	1	451	4	3.058
Atp2a2	4	0.99508	0.98698	1	19473	0	2.9023	0.0049197	0.026483	1	452	4	2.9023
Olfr111	4	0.44637	0.65739	1	12364	1	4.2742	0.004923	0.026483	1	453	3	4.2742
Gm21943	4	0.71701	0.79731	1	15881	1	1.7773	0.0049389	0.026761	1	454	3	1.7773
Nup62cl	4	0.92615	0.88145	1	18001	1	3.8503	0.0049728	0.027309	1	455	3	3.8503
Aim1l	4	0.076467	0.29844	1	4285	2	0.23766	0.0049734	0.027309	1	456	2	0.23766
Tex19.1	4	0.23914	0.51391	1	8707	1	3.835	0.0050228	0.027583	1	457	3	3.835
Exoc3l4	4	0.88073	0.85765	1	17378	1	1.5391	0.00504	0.027583	1	458	2	1.5391
Tmem33	4	0.99493	0.98654	1	19472	0	3.9224	0.0050684	0.027716	1	459	4	3.9224
Clec2e	4	0.99492	0.98654	1	19471	0	2.6055	0.005082	0.027716	1	460	4	2.6055
Olfr1499	4	0.67808	0.77864	1	15542	1	4.4896	0.0050835	0.027716	1	461	3	4.4896
Golim4	4	0.66516	0.77122	1	15349	1	1.2512	0.0050905	0.027716	1	462	2	1.2512
Nlk	4	0.9949	0.98638	1	19470	0	2.5612	0.0051042	0.027861	1	463	4	2.5612
Acvr2a	4	0.99489	0.9862	1	19469	0	2.5122	0.0051149	0.028019	1	464	4	2.5122
Strip1	4	0.58974	0.7347	1	14324	1	3.7583	0.0051363	0.028019	1	465	3	3.7583
Acin1	4	0.21572	0.49392	1	8116	2	-2.2922	0.0051411	0.02802	1	466	2	-2.2922
4931429L15Rik	4	0.44453	0.65739	1	12334	1	3.951	0.0051647	0.02802	1	467	3	3.951
Kcnk3	4	0.99483	0.9862	1	19468	0	2.3001	0.0051694	0.02802	1	468	4	2.3001
Armc8	4	0.9948	0.9862	1	19467	0	3.4768	0.0052038	0.028186	1	469	4	3.4768
Atf1	4	0.9063	0.86837	1	17700	1	4.4836	0.0052051	0.028186	1	470	3	4.4836
Tmem60	4	0.98264	0.95819	1	19125	0	3.5133	0.0052274	0.028186	1	471	4	3.5133
Evc	4	0.86967	0.85306	1	17239	1	4.4226	0.0052335	0.028186	1	472	3	4.4226
Neurl4	4	0.00091041	0.017815	1	90	2	-3.4899	0.0052422	0.028186	1	473	2	-3.4899
Vmn1r88	4	0.78943	0.81889	1	16415	1	4.1318	0.0052465	0.028186	1	474	3	4.1318
Ssfa2	4	0.99474	0.9862	1	19464	0	1.9668	0.005264	0.028475	1	475	4	1.9668
Mlh1	4	0.92517	0.88145	1	17991	1	4.0987	0.0052941	0.028777	1	476	3	4.0987
Usp9y	4	0.95999	0.91003	1	18610	0	4.0783	0.0052979	0.028778	1	477	3	4.0783
H60b	4	0.99468	0.98571	1	19463	0	1.897	0.0053218	0.029076	1	478	4	1.897
0610010F05Rik	4	0.066619	0.27269	1	3956	2	-1.2669	0.0053433	0.029077	1	479	2	-1.2669
Elf4	4	0.99464	0.98554	1	19462	0	3.1728	0.0053609	0.029399	1	480	4	3.1728
Cyfip1	4	0.89084	0.86296	1	17507	1	3.7058	0.005369	0.029399	1	481	3	3.7058
Cacng5	4	0.40609	0.63828	1	11789	2	-0.8107	0.0053938	0.029733	1	482	2	-0.8107
Aqp7	4	0.99458	0.98501	1	19460	0	1.9563	0.0054225	0.030043	1	483	4	1.9563
Prl4a1	4	0.99457	0.98501	1	19459	0	2.1222	0.0054265	0.030043	1	484	4	2.1222
Capn10	4	0.99457	0.98501	1	19458	0	3.2513	0.0054306	0.030043	1	485	4	3.2513
Acads	4	0.1536	0.42717	1	6515	2	-1.4308	0.0054444	0.030043	1	486	2	-1.4308
Ang	4	0.99454	0.98501	1	19457	0	2.183	0.0054632	0.030043	1	487	4	2.183
Mroh6	4	0.36438	0.60988	1	11212	2	-2.7406	0.0054949	0.030043	1	488	1	-2.7406
Olfr1155	4	0.9945	0.98501	1	19456	0	2.5783	0.0054959	0.030043	1	489	4	2.5783
Selt	4	0.71746	0.79731	1	15883	1	3.2416	0.0055	0.030043	1	490	3	3.2416
Olfr1205	4	0.10876	0.35878	1	5253	1	3.5901	0.0055344	0.030199	1	491	3	3.5901
Lpin2	4	0.70931	0.79424	1	15831	1	3.7193	0.0055433	0.030375	1	492	3	3.7193
Lrrc27	4	0.89605	0.86531	1	17574	1	1.7137	0.0055455	0.030375	1	493	2	1.7137
Lmf2	4	0.99444	0.98448	1	19455	0	2.7414	0.0055638	0.030701	1	494	4	2.7414
Ctnnd2	4	0.87673	0.8554	1	17324	1	2.9573	0.0055753	0.030886	1	495	3	2.9573
Zfp62	4	0.9879	0.9676	1	19266	0	3.8128	0.005579	0.03104	1	496	4	3.8128
Wdsub1	4	0.99436	0.98392	1	19453	0	2.0806	0.0056428	0.031388	1	497	4	2.0806
Chrdl1	4	0.26936	0.54223	1	9472	2	-0.53798	0.0056465	0.031388	1	498	2	-0.53798
Krt7	4	0.80021	0.82352	1	16510	1	3.3965	0.0056904	0.031388	1	499	3	3.3965
Ipo9	4	0.61159	0.74502	1	14603	1	4.404	0.0056916	0.031388	1	500	3	4.404
Vmn1r212	4	0.15055	0.4218	1	6416	2	-2.096	0.0056971	0.031388	1	501	2	-2.096
2410089E03Rik	4	0.98665	0.96538	1	19228	0	3.9371	0.0057212	0.031388	1	502	4	3.9371
Pgls	4	0.99428	0.98392	1	19452	0	3.1581	0.0057247	0.031388	1	503	4	3.1581
Coa4	4	0.27847	0.54758	1	9705	2	-0.24283	0.0057366	0.031564	1	504	2	-0.24283
Impg1	4	0.99423	0.98372	1	19451	0	2.5439	0.005766	0.031565	1	505	4	2.5439
Pomk	4	0.9829	0.95819	1	19135	0	3.5829	0.0057704	0.031565	1	506	4	3.5829
L3mbtl3	4	0.92723	0.88298	1	18023	1	4.0305	0.0057722	0.031565	1	507	3	4.0305
Icam2	4	0.99417	0.98372	1	19450	0	2.7768	0.0058343	0.035097	1	508	4	2.7768
Krtcap2	4	0.16789	0.44211	1	6883	2	-0.57068	0.0058362	0.035097	1	509	2	-0.57068
2300005B03Rik	4	0.99416	0.98372	1	19449	0	3.0931	0.0058407	0.035097	1	510	4	3.0931
Olfr982	4	0.39895	0.63371	1	11678	1	3.4106	0.0058437	0.035097	1	511	3	3.4106
Olfr1295	4	0.41053	0.64335	1	11863	2	-0.97426	0.0058487	0.035097	1	512	2	-0.97426
Fam81a	4	0.99415	0.98372	1	19448	0	2.6203	0.0058525	0.035097	1	513	4	2.6203
4931408C20Rik	4	0.98672	0.96538	1	19230	0	4.1087	0.0058658	0.035097	1	514	4	4.1087
Bhlhe22	4	0.9657	0.92199	1	18713	0	4.0412	0.0058695	0.035097	1	515	3	4.0412
Brwd1	4	0.97577	0.9471	1	18944	0	2.5087	0.0058992	0.035271	1	516	4	2.5087
Med26	4	0.55496	0.72056	1	13844	1	4.6182	0.0059046	0.035271	1	517	3	4.6182
2810474O19Rik	4	0.2047	0.48805	1	7829	2	-0.26495	0.0059138	0.035272	1	518	2	-0.26495
Gm8660	1	0.99407	0.99489	1	19447	0	8.0685	0.0059313	0.0051084	0.759206	519	1	8.0685
Snap29	4	0.35237	0.60092	1	11043	1	4.4691	0.0059529	0.035435	1	520	3	4.4691
Lrp5	4	0.99404	0.98354	1	19446	0	2.5229	0.0059628	0.035621	1	521	4	2.5229
Smug1	4	0.99403	0.98354	1	19445	0	3.5316	0.0059693	0.035621	1	522	4	3.5316
Whsc1l1	4	0.62369	0.75187	1	14784	1	2.5999	0.005978	0.035621	1	523	2	2.5999
Ccdc149	4	0.99402	0.98354	1	19444	0	2.384	0.0059792	0.035621	1	524	4	2.384
Gm12888	4	0.91264	0.87221	1	17797	1	3.7042	0.0059964	0.035969	1	525	3	3.7042
Nelfb	4	0.2388	0.51391	1	8701	3	-4.8798	0.0060002	0.035969	1	526	1	-4.8798
Thap3	4	0.23889	0.51391	1	8703	1	4.0429	0.0060052	0.035969	1	527	3	4.0429
3110007F17Rik	4	0.99399	0.98354	1	19443	0	2.9785	0.0060054	0.035969	1	528	4	2.9785
Vmn1r185	4	0.99397	0.98334	1	19442	0	2.7437	0.0060306	0.036139	1	529	4	2.7437
Smim7	4	0.087296	0.31559	1	4618	2	-0.28562	0.0060425	0.036139	1	530	2	-0.28562
Cers6	4	0.14734	0.41894	1	6338	1	3.3014	0.0060507	0.036139	1	531	3	3.3014
Olfr538	4	0.99393	0.98334	1	19441	0	1.979	0.0060725	0.036139	1	532	4	1.979
Aplf	4	0.9939	0.98316	1	19439	0	2.5587	0.0060979	0.036293	1	533	4	2.5587
Ubxn8	4	0.19887	0.47553	1	7683	2	-2.693	0.0061013	0.036293	1	534	2	-2.693
Iffo1	4	0.98784	0.9676	1	19263	0	3.5808	0.0061088	0.036293	1	535	4	3.5808
Usp44	4	0.22524	0.50467	1	8339	2	-4.3628	0.0061518	0.036486	1	536	1	-4.3628
6430573F11Rik	4	0.016542	0.13088	1	1171	1	2.7646	0.006168	0.036486	1	537	2	2.7646
Bpnt1	4	0.28913	0.56381	1	9967	2	0.04708	0.0062023	0.036662	1	538	2	0.04708
Inpp1	4	0.99371	0.98238	1	19436	0	3.6897	0.0062154	0.036831	1	539	4	3.6897
Cylc2	4	0.99378	0.98257	1	19437	0	3.1245	0.0062217	0.037106	1	540	4	3.1245
Olfr32	4	0.88497	0.85917	1	17435	1	3.4499	0.0062557	0.037463	1	541	3	3.4499
Icmt	4	0.97381	0.94245	1	18904	0	3.7484	0.0062884	0.037463	1	542	4	3.7484
Rfx4	4	0.37902	0.61783	1	11414	2	0.23138	0.0062899	0.037463	1	543	2	0.23138
Arid1a	4	0.93981	0.89134	1	18249	0	0.69492	0.0062994	0.037463	1	544	2	0.69492
Eci3	4	0.17717	0.45013	1	7131	3	-3.9246	0.0063033	0.037463	1	545	1	-3.9246
Gldn	4	0.69345	0.78729	1	15734	1	3.9903	0.0063251	0.037647	1	546	3	3.9903
Dmrta1	4	0.99367	0.98217	1	19435	0	3.1259	0.0063292	0.037648	1	547	4	3.1259
Tmem63c	3	0.98182	0.96233	1	19108	0	4.4107	0.0063618	0.024359	1	548	3	4.4107
Slc30a4	4	0.44683	0.65739	1	12368	1	3.7643	0.0063912	0.038034	1	549	3	3.7643
Zfp367	4	0.98908	0.97094	1	19297	0	4.0586	0.0063988	0.038035	1	550	4	4.0586
Tlr7	4	0.9936	0.98197	1	19434	0	3.1269	0.0064036	0.038035	1	551	4	3.1269
Hcrtr1	4	0.03468	0.21241	1	2259	3	-6.4252	0.0064043	0.038035	1	552	1	-6.4252
Moxd2	4	0.99359	0.98197	1	19433	0	3.0729	0.0064093	0.038035	1	553	4	3.0729
Tjp1	4	0.61782	0.75075	1	14698	1	3.5428	0.0064107	0.038035	1	554	3	3.5428
Ankef1	4	0.96915	0.93064	1	18791	0	3.7867	0.0064263	0.038242	1	555	3	3.7867
Gas2	4	0.76141	0.80581	1	16204	1	2.8513	0.0064273	0.038242	1	556	2	2.8513
Trap1a	4	0.89928	0.86606	1	17621	1	2.538	0.0064321	0.038243	1	557	2	2.538
Gramd1b	4	0.23379	0.5115	1	8561	1	4.038	0.0064416	0.038441	1	558	3	4.038
Cdkn2aip	4	0.87231	0.85382	1	17263	1	4.4443	0.0064464	0.038441	1	559	3	4.4443
Atp2a1	4	0.7227	0.79807	1	15917	1	4.2103	0.0064559	0.038811	1	560	3	4.2103
Sptlc2	4	0.99354	0.98178	1	19432	0	3.0858	0.0064566	0.038811	1	561	4	3.0858
Zfp146	4	0.94064	0.89211	1	18263	0	3.5102	0.0064636	0.038811	1	562	3	3.5102
Cd37	4	0.99353	0.98178	1	19431	0	1.6863	0.0064728	0.038811	1	563	4	1.6863
Dpy19l4	4	0.9935	0.98178	1	19430	0	2.6688	0.0064971	0.038811	1	564	4	2.6688
Cd5l	4	0.085493	0.31448	1	4554	2	-2.9194	0.0065053	0.038811	1	565	2	-2.9194
Rai1	4	0.94192	0.89361	1	18288	0	4.048	0.0065187	0.038811	1	566	3	4.048
Dcaf4	4	0.99348	0.98158	1	19429	0	2.4867	0.0065227	0.038987	1	567	4	2.4867
Gm8267	4	0.20355	0.48767	1	7794	1	4.4918	0.0065483	0.038987	1	568	3	4.4918
Ppdpf	4	0.22741	0.50573	1	8399	1	3.6911	0.0065642	0.038988	1	569	3	3.6911
Ocel1	4	0.99344	0.98158	1	19428	0	2.334	0.0065648	0.038988	1	570	4	2.334
Acp5	4	0.99343	0.98158	1	19427	0	3.4681	0.0065683	0.038988	1	571	4	3.4681
Cckbr	4	0.99343	0.98158	1	19426	0	2.1195	0.006573	0.038988	1	572	4	2.1195
Svs3a	4	0.99342	0.98158	1	19425	0	3.2474	0.0065753	0.038988	1	573	4	3.2474
Zfp541	4	0.99218	0.97861	1	19393	0	3.7918	0.0065757	0.038988	1	574	4	3.7918
Mkl1	4	0.85885	0.84528	1	17112	1	3.4614	0.006596	0.039187	1	575	3	3.4614
9430015G10Rik	4	0.26702	0.53884	1	9409	1	3.3915	0.0066063	0.039187	1	576	3	3.3915
Ccdc151	4	0.99339	0.98158	1	19424	0	2.5686	0.0066141	0.039479	1	577	4	2.5686
Egfl7	4	0.4106	0.64335	1	11864	1	3.9559	0.0066159	0.039479	1	578	3	3.9559
Gm6432	4	0.99338	0.98158	1	19423	0	2.6025	0.0066176	0.039479	1	579	4	2.6025
Kcnj9	4	0.90389	0.86683	1	17677	1	3.4243	0.0066478	0.03948	1	580	3	3.4243
Hnrnpc	4	0.83341	0.83168	1	16855	1	-3.1856	0.0066568	0.03948	1	581	1	-3.1856
Dusp6	4	0.2725	0.54289	1	9553	1	2.9166	0.0066578	0.03948	1	582	3	2.9166
Ptpn11	4	0.80055	0.82352	1	16514	1	4.4841	0.0066771	0.03966	1	583	3	4.4841
Ccdc120	4	0.072643	0.28707	1	4162	3	-6.3781	0.0067073	0.040161	1	584	1	-6.3781
Pax4	4	0.99328	0.98137	1	19422	0	2.4973	0.0067194	0.040162	1	585	4	2.4973
Prss12	4	0.98684	0.96601	1	19232	0	3.5347	0.006722	0.040162	1	586	4	3.5347
Gm4922	4	0.51841	0.69579	1	13370	2	0.56243	0.0067306	0.040349	1	587	2	0.56243
Triml1	4	0.28321	0.55794	1	9817	2	0.029374	0.0067354	0.040349	1	588	2	0.029374
Adamts2	4	0.1517	0.42289	1	6455	2	-0.48373	0.0067578	0.040349	1	589	2	-0.48373
Rnf219	4	0.99323	0.98116	1	19421	0	3.9026	0.0067672	0.040349	1	590	4	3.9026
Sap30	4	0.99323	0.98116	1	19420	0	2.8969	0.0067732	0.040542	1	591	4	2.8969
Usp22	4	0.26026	0.53172	1	9233	2	-0.40383	0.0067744	0.040542	1	592	2	-0.40383
Skor2	4	0.99321	0.98116	1	19419	0	2.8848	0.0067864	0.040542	1	593	4	2.8848
Mob4	4	0.9932	0.98116	1	19418	0	2.9138	0.0067972	0.040542	1	594	4	2.9138
Commd6	4	0.9932	0.98116	1	19417	0	3.5485	0.0067984	0.040543	1	595	4	3.5485
Abtb1	4	0.80269	0.8243	1	16534	1	1.1617	0.0068083	0.040543	1	596	2	1.1617
Ggct	4	0.99319	0.98116	1	19415	0	1.9597	0.0068098	0.040543	1	597	4	1.9597
Cks1b	4	0.18989	0.46766	1	7460	3	-5.59	0.0068588	0.040714	1	598	1	-5.59
Gp1bb	4	0.95823	0.90597	1	18579	0	3.8793	0.0068675	0.040714	1	599	3	3.8793
Trps1	4	0.40924	0.64335	1	11850	1	3.6416	0.006868	0.040714	1	600	3	3.6416
Erlec1	4	0.97266	0.94102	1	18864	0	3.4964	0.0068701	0.040715	1	601	3	3.4964
Uckl1	4	0.75162	0.80269	1	16117	1	2.7069	0.0069093	0.040715	1	602	3	2.7069
Fam78b	4	0.012753	0.10949	1	938	1	3.0608	0.0069364	0.040909	1	603	3	3.0608
Cmtm7	4	0.37595	0.61547	1	11372	1	3.4686	0.0069376	0.040909	1	604	3	3.4686
Mobp	4	0.99305	0.98074	1	19414	0	1.9811	0.0069547	0.041109	1	605	4	1.9811
Scgn	4	0.97415	0.94347	1	18915	0	1.2412	0.0069598	0.041109	1	606	4	1.2412
Rac1	4	0.99304	0.98074	1	19413	0	3.5795	0.0069645	0.041313	1	607	4	3.5795
Wdr62	4	0.99303	0.98074	1	19412	0	3.5687	0.0069743	0.041314	1	608	4	3.5687
4833420G17Rik	4	0.94364	0.89509	1	18322	0	3.6317	0.0069747	0.041314	1	609	3	3.6317
Tpte	4	0.31411	0.58178	1	10565	1	3.5862	0.0069974	0.041718	1	610	3	3.5862
Tldc1	4	0.24918	0.52166	1	8956	2	0.50942	0.0070103	0.041918	1	611	2	0.50942
Sfi1	4	0.97128	0.93754	1	18836	0	3.7949	0.007045	0.042094	1	612	3	3.7949
Mocs2	4	0.54687	0.71557	1	13731	2	2.2724	0.0070554	0.042094	1	613	2	2.2724
Dntt	4	0.81325	0.82666	1	16645	1	2.0801	0.0070607	0.042094	1	614	3	2.0801
4930502E18Rik	4	0.95762	0.90389	1	18570	0	3.5637	0.0070824	0.042095	1	615	3	3.5637
Ctns	4	0.99292	0.98032	1	19411	0	3.3143	0.0070827	0.042095	1	616	4	3.3143
C1ql3	4	0.99157	0.97652	1	19373	0	3.5053	0.0070866	0.042095	1	617	4	3.5053
Caskin2	4	0.89597	0.86491	1	17571	1	3.747	0.0070953	0.042095	1	618	3	3.747
2610034B18Rik	4	0.6778	0.77864	1	15538	1	1.1997	0.0071112	0.042275	1	619	3	1.1997
BC049352	4	0.95682	0.90315	1	18557	0	2.66	0.0071353	0.04246	1	620	2	2.66
Ankrd16	4	0.71464	0.79692	1	15870	1	3.2392	0.0071555	0.042788	1	621	3	3.2392
Il2rb	3	0.036189	0.17018	1	2351	2	-6.7216	0.0071575	0.029641	1	622	1	-6.7216
Atp4b	4	0.88891	0.8615	1	17478	1	3.9489	0.0072055	0.042788	1	623	3	3.9489
Olfr95	4	0.99279	0.9799	1	19409	0	2.1576	0.0072099	0.042788	1	624	4	2.1576
Sis	4	0.6923	0.78656	1	15726	1	-1.6948	0.0072122	0.042788	1	625	1	-1.6948
Tcp11l1	4	0.65794	0.76821	1	15260	1	3.9579	0.0072123	0.042788	1	626	3	3.9579
Dguok	4	0.17588	0.45013	1	7092	2	-0.70437	0.0072457	0.042789	1	627	2	-0.70437
Olfr513	4	0.97585	0.9471	1	18948	0	1.1906	0.0072626	0.042789	1	628	4	1.1906
Arfgap2	4	0.99273	0.9799	1	19408	0	2.4542	0.0072704	0.042789	1	629	4	2.4542
Mageb1	4	0.84655	0.84137	1	16982	1	3.3353	0.0072735	0.042789	1	630	3	3.3353
Hes1	4	0.99272	0.9799	1	19407	0	3.1786	0.007278	0.042789	1	631	4	3.1786
Hrh4	4	0.99271	0.9799	1	19406	0	1.7209	0.0072856	0.042789	1	632	4	1.7209
Tulp4	4	0.63804	0.76159	1	14981	1	1.5492	0.0073131	0.042789	1	633	3	1.5492
Tmem179	4	0.99266	0.9799	1	19403	0	2.145	0.0073427	0.043002	1	634	4	2.145
Lamtor4	4	0.99265	0.9799	1	19402	0	2.015	0.0073541	0.043002	1	635	4	2.015
Gm14434	4	0.93741	0.89057	1	18199	1	3.1495	0.007357	0.043002	1	636	3	3.1495
Optn	4	0.91232	0.87221	1	17789	1	3.6719	0.0073735	0.043474	1	637	3	3.6719
Rhox1	4	0.99262	0.97969	1	19401	0	2.6506	0.0073835	0.043475	1	638	4	2.6506
Dpep1	4	0.99261	0.97969	1	19400	0	2.5905	0.0073925	0.043475	1	639	4	2.5905
Galnt14	4	0.5852	0.7329	1	14256	1	2.9116	0.0074028	0.043657	1	640	3	2.9116
Cldn12	4	0.24543	0.5196	1	8867	2	-2.2877	0.0074141	0.043657	1	641	2	-2.2877
Zfp286	4	0.50195	0.68785	1	13126	1	3.9349	0.0074163	0.043657	1	642	3	3.9349
Tnfrsf10b	4	0.99254	0.97949	1	19399	0	2.9633	0.0074605	0.043657	1	643	4	2.9633
Tnfaip6	4	0.98321	0.95891	1	19138	0	2.7287	0.0074645	0.043657	1	644	4	2.7287
Mical2	4	0.19384	0.47062	1	7570	1	4.2667	0.0074742	0.043657	1	645	3	4.2667
Syne1	4	0.9774	0.94928	1	18991	0	3.1874	0.0074793	0.043657	1	646	4	3.1874
Gclm	4	0.98909	0.97094	1	19299	0	4.353	0.0075049	0.043839	1	647	4	4.353
Vegfa	4	0.99248	0.97927	1	19398	0	2.801	0.0075199	0.043839	1	648	4	2.801
4933413G19Rik	4	0.97043	0.93389	1	18815	0	3.5542	0.0075457	0.04384	1	649	3	3.5542
Furin	4	0.99245	0.97927	1	19397	0	2.714	0.0075459	0.04384	1	650	4	2.714
Commd2	4	0.83574	0.83358	1	16878	1	1.4002	0.0075654	0.04384	1	651	3	1.4002
Hmx3	4	0.75862	0.80581	1	16178	1	3.5277	0.0076152	0.044229	1	652	3	3.5277
Map3k7cl	4	0.99235	0.97885	1	19396	0	2.845	0.0076464	0.044229	1	653	4	2.845
Olfr1537	4	0.66918	0.77259	1	15410	2	2.2199	0.0076543	0.044229	1	654	2	2.2199
Tgfb3	4	0.99234	0.97885	1	19395	0	2.0781	0.0076569	0.044442	1	655	4	2.0781
Reep5	4	0.57004	0.72775	1	14059	1	3.4788	0.0076589	0.044442	1	656	3	3.4788
Cast	4	0.95249	0.89886	1	18489	0	1.7494	0.0076664	0.044442	1	657	3	1.7494
Mgst1	4	0.088574	0.32491	1	4663	2	-2.1186	0.0077168	0.044443	1	658	2	-2.1186
Ppp1r3d	4	0.99228	0.97885	1	19394	0	3.3191	0.0077215	0.044443	1	659	4	3.3191
Arhgef11	4	0.99185	0.97772	1	19380	0	3.2453	0.0077424	0.044661	1	660	4	3.2453
Olfr819	4	0.62231	0.75187	1	14761	1	3.6172	0.007791	0.044661	1	661	3	3.6172
Fbxo25	4	0.37573	0.61547	1	11369	1	0.72793	0.0078102	0.044661	1	662	2	0.72793
Dnaaf3	4	0.42464	0.64785	1	12059	2	-1.6773	0.0078177	0.044661	1	663	2	-1.6773
Olfr394	4	0.30093	0.57463	1	10254	1	3.1677	0.0078311	0.044828	1	664	3	3.1677
Olfr9	4	0.99215	0.97841	1	19392	0	3.218	0.0078532	0.045361	1	665	4	3.218
Asph	4	0.99213	0.97841	1	19390	0	3.2695	0.0078666	0.045361	1	666	4	3.2695
Tdp2	4	0.075585	0.29378	1	4258	3	-6.1226	0.0078682	0.045361	1	667	1	-6.1226
Gadd45b	4	0.99212	0.97841	1	19389	0	2.2827	0.007876	0.045361	1	668	4	2.2827
Blvrb	4	0.99211	0.97841	1	19388	0	2.326	0.0078894	0.045362	1	669	4	2.326
G630090E17Rik	4	0.9921	0.97841	1	19387	0	1.9067	0.0079042	0.045362	1	670	4	1.9067
Gltscr1l	4	0.99209	0.97841	1	19386	0	2.4021	0.0079096	0.045362	1	671	4	2.4021
Wbp1l	4	0.19036	0.46766	1	7470	3	-5.5777	0.0079186	0.045904	1	672	1	-5.5777
Ube2d2a	4	0.99203	0.97817	1	19385	0	3.5528	0.0079663	0.045904	1	673	4	3.5528
H2-M10.5	4	0.21307	0.4932	1	8042	3	-4.2347	0.0079691	0.045904	1	674	1	-4.2347
Chm	4	0.72159	0.79807	1	15911	1	1.5869	0.007994	0.04611	1	675	2	1.5869
Oas3	4	0.992	0.97794	1	19384	0	2.3549	0.0080002	0.04611	1	676	4	2.3549
Olfr884	4	0.37604	0.61547	1	11373	1	2.0226	0.0080195	0.04611	1	677	3	2.0226
Olfr1362	4	0.97765	0.94928	1	19001	0	3.8452	0.0080257	0.04611	1	678	4	3.8452
Vmn1r100	4	0.99195	0.97794	1	19383	0	2.8364	0.0080512	0.046323	1	679	4	2.8364
Vmn1r12	4	0.99194	0.97794	1	19382	0	2.4018	0.0080587	0.046324	1	680	4	2.4018
Ino80c	4	0.85792	0.84448	1	17099	1	3.5559	0.0080663	0.046324	1	681	3	3.5559
Col22a1	4	0.38213	0.61847	1	11451	2	-1.498	0.00807	0.046324	1	682	2	-1.498
Emilin1	4	0.8971	0.86531	1	17587	1	3.8274	0.008098	0.046517	1	683	3	3.8274
Obox6	4	0.66336	0.77042	1	15327	2	0.13088	0.0081204	0.046829	1	684	2	0.13088
Naa40	4	0.99186	0.97772	1	19381	0	2.8561	0.0081409	0.046829	1	685	4	2.8561
Crtam	4	0.56792	0.72775	1	14025	1	3.9809	0.0081478	0.046829	1	686	3	3.9809
Ccdc171	4	0.99184	0.97772	1	19379	0	3.1693	0.0081602	0.046829	1	687	4	3.1693
Abcb7	4	0.80337	0.8247	1	16542	1	-3.5267	0.0081708	0.046829	1	688	1	-3.5267
Slc45a4	4	0.99181	0.97772	1	19378	0	3.3594	0.0081933	0.046829	1	689	4	3.3594
AF529169	4	0.9918	0.97772	1	19377	0	1.9009	0.0081974	0.046829	1	690	4	1.9009
Plscr1	4	0.080402	0.30476	1	4401	2	-0.40723	0.0082213	0.046829	1	691	2	-0.40723
Cldn10	4	0.86422	0.8484	1	17176	1	3.1021	0.008228	0.046829	1	692	3	3.1021
Tmem50b	4	0.93216	0.88449	1	18101	1	3.7334	0.0082303	0.046829	1	693	3	3.7334
2410016O06Rik	4	0.66638	0.77202	1	15367	1	3.5801	0.0082555	0.046829	1	694	3	3.5801
Olfr214	4	0.81161	0.82666	1	16627	1	2.3426	0.0082717	0.046829	1	695	3	2.3426
Npepl1	4	0.99172	0.97772	1	19376	0	2.6488	0.0082751	0.046829	1	696	4	2.6488
Hk2	4	0.82895	0.82975	1	16817	1	3.8009	0.0082785	0.046829	1	697	3	3.8009
Siglece	4	0.3439	0.5979	1	10922	2	-2.1161	0.0083221	0.047042	1	698	2	-2.1161
Tgoln1	4	0.78261	0.81697	1	16370	1	3.652	0.0083353	0.04723	1	699	3	3.652
Pdcl	4	0.99165	0.97726	1	19375	0	3.085	0.0083478	0.04723	1	700	4	3.085
Uchl3	4	0.88473	0.85917	1	17431	1	3.7685	0.0083546	0.04723	1	701	3	3.7685
Ube3c	4	0.99164	0.97726	1	19374	0	3.5292	0.0083576	0.04723	1	702	4	3.5292
Abcb5	4	0.39547	0.63011	1	11626	1	3.3229	0.0083593	0.04723	1	703	3	3.3229
Dchs1	4	0.7704	0.81041	1	16278	1	3.0361	0.0083726	0.047231	1	704	3	3.0361
Pi4k2b	4	0.92289	0.87993	1	17952	1	3.3156	0.0084149	0.047664	1	705	3	3.3156
Vmn2r62	4	0.057741	0.26254	1	3559	3	-6.2965	0.008423	0.047664	1	706	1	-6.2965
Tcl1b4	4	0.99157	0.97652	1	19372	0	2.9071	0.0084308	0.047872	1	707	4	2.9071
Foxo1	4	0.73057	0.79882	1	15965	1	3.6169	0.0084335	0.047872	1	708	3	3.6169
BC080695	4	0.99154	0.97652	1	19371	0	1.4793	0.0084605	0.047872	1	709	4	1.4793
Ociad2	4	0.99154	0.97652	1	19370	0	3.356	0.0084647	0.047872	1	710	4	3.356
Prtg	4	0.2738	0.54456	1	9590	1	3.0221	0.0084759	0.047872	1	711	3	3.0221
Alkbh7	4	0.99151	0.97652	1	19369	0	1.9589	0.0084902	0.047872	1	712	4	1.9589
Gm13277	4	0.9915	0.97627	1	19368	0	1.4724	0.0084959	0.048098	1	713	4	1.4724
Tmem209	4	0.97981	0.95349	1	19054	0	4.0195	0.0085031	0.048098	1	714	4	4.0195
Clvs2	4	0.99149	0.97627	1	19367	0	1.7849	0.008513	0.048098	1	715	4	1.7849
Olfr1204	4	0.99148	0.97627	1	19366	0	2.3265	0.0085222	0.048431	1	716	4	2.3265
Nudt19	4	0.39924	0.63371	1	11685	2	-0.24784	0.0085249	0.048431	1	717	2	-0.24784
Cptp	4	0.99006	0.97368	1	19329	0	3.9372	0.0085411	0.048431	1	718	4	3.9372
C130079G13Rik	4	0.51448	0.69231	1	13315	1	2.38	0.0085743	0.048432	1	719	3	2.38
Phlda2	4	0.32499	0.58678	1	10704	2	-0.65661	0.0085794	0.048661	1	720	2	-0.65661
Zfp105	4	0.99141	0.97601	1	19364	0	2.4416	0.0085943	0.048661	1	721	4	2.4416
Tsks	4	0.95997	0.91003	1	18609	0	3.6705	0.0086093	0.048661	1	722	3	3.6705
Asf1a	4	0.32423	0.58678	1	10694	1	1.55	0.0086247	0.048661	1	723	3	1.55
Spz1	4	0.99136	0.97601	1	19363	0	2.3745	0.0086432	0.048661	1	724	4	2.3745
Ezh1	4	0.26935	0.54223	1	9469	1	1.3646	0.0086751	0.048661	1	725	3	1.3646
Kcnn2	4	0.99131	0.97601	1	19362	0	2.6743	0.0086878	0.048661	1	726	4	2.6743
Arhgap28	4	0.57739	0.72986	1	14172	1	3.6569	0.0086944	0.048661	1	727	3	3.6569
AY761185	4	0.8228	0.82819	1	16749	1	4.3264	0.0087054	0.048661	1	728	3	4.3264
H2afv	4	0.99128	0.97601	1	19361	0	2.809	0.0087182	0.048662	1	729	4	2.809
Plcxd2	4	0.99128	0.97601	1	19360	0	2.5162	0.0087196	0.048662	1	730	4	2.5162
Dmrt1	4	0.99128	0.97601	1	19359	0	2.732	0.008724	0.048662	1	731	4	2.732
Clec3b	4	0.30718	0.57916	1	10403	2	-1.3951	0.0087255	0.048662	1	732	2	-1.3951
Nxph1	4	0.67823	0.77864	1	15543	2	0.39079	0.0087384	0.048662	1	733	2	0.39079
Tssk3	4	0.99126	0.97601	1	19358	0	3.2905	0.0087399	0.048662	1	734	4	3.2905
Zfp961	4	0.36333	0.60988	1	11197	1	3.431	0.0087564	0.048662	1	735	3	3.431
Olfr642	4	0.99123	0.97601	1	19357	0	2.473	0.0087719	0.048662	1	736	4	2.473
Adi1	4	0.051404	0.24822	1	3225	2	-1.2825	0.008776	0.048662	1	737	2	-1.2825
Cd36	4	0.70148	0.79038	1	15784	1	3.6901	0.0087779	0.048662	1	738	3	3.6901
A430105I19Rik	4	0.99118	0.97601	1	19356	0	3.4408	0.00882	0.048662	1	739	4	3.4408
Slc30a1	4	0.19735	0.47286	1	7643	3	-2.7606	0.0088264	0.048662	1	740	1	-2.7606
Tas2r135	4	0.99117	0.97601	1	19355	0	2.0834	0.0088273	0.048662	1	741	4	2.0834
Psenen	4	0.97002	0.93334	1	18808	0	3.9152	0.0088544	0.048662	1	742	3	3.9152
Ubr1	4	0.53165	0.70352	1	13527	1	3.1095	0.0088988	0.049087	1	743	3	3.1095
Gm6086	4	0.53765	0.70951	1	13617	2	0.047039	0.0089099	0.049088	1	744	2	0.047039
Cdc14b	4	0.98965	0.97263	1	19315	0	3.5808	0.0089557	0.049548	1	745	4	3.5808
Prnp	4	0.99104	0.97552	1	19354	0	2.1724	0.0089581	0.049548	1	746	4	2.1724
Vrk3	4	0.15633	0.43075	1	6578	2	-2.1931	0.0089776	0.049548	1	747	2	-2.1931
Nipsnap3b	4	0.57969	0.73231	1	14200	2	-2.7819	0.009028	0.049548	1	748	1	-2.7819
Cwh43	4	0.99096	0.97552	1	19352	0	1.7799	0.0090426	0.049548	1	749	4	1.7799
Tigit	3	0.80472	0.77043	1	16553	1	4.22	0.0090473	0.038907	1	750	2	4.22
C1ql4	4	0.37085	0.61297	1	11302	2	-0.49327	0.009055	0.049782	1	751	2	-0.49327
Cd14	4	0.001547	0.022816	1	134	1	3.0299	0.0090784	0.049783	1	752	3	3.0299
Cmas	4	0.9909	0.97526	1	19351	0	1.9624	0.0090963	0.049783	1	753	4	1.9624
St3gal5	4	0.9909	0.97526	1	19350	0	2.3837	0.0091038	0.049783	1	754	4	2.3837
Tfpt	4	0.99087	0.97499	1	19349	0	3.2006	0.0091263	0.050022	1	755	4	3.2006
Dzank1	4	0.27017	0.54223	1	9485	2	-0.4265	0.0091288	0.050022	1	756	2	-0.4265
St6galnac1	4	0.6512	0.76705	1	15174	1	3.4479	0.0091384	0.050022	1	757	3	3.4479
Zfp369	4	0.35255	0.60092	1	11051	1	3.5884	0.0091482	0.050022	1	758	3	3.5884
Cyp51	4	0.85455	0.84448	1	17060	1	4.0251	0.0091752	0.05048	1	759	3	4.0251
Capn1	4	0.31275	0.58117	1	10542	2	-3.1473	0.0091792	0.05048	1	760	1	-3.1473
Lyrm9	4	0.9908	0.97448	1	19347	0	3.3814	0.0091954	0.050701	1	761	4	3.3814
Stk38	4	0.9908	0.97448	1	19346	0	2.8605	0.0091984	0.050701	1	762	4	2.8605
Adat1	4	0.68423	0.78036	1	15644	1	3.5326	0.0092293	0.051038	1	763	3	3.5326
1700056E22Rik	4	0.94309	0.89509	1	18313	0	1.5636	0.0092296	0.051038	1	764	3	1.5636
Gapvd1	4	0.99077	0.97448	1	19345	0	2.696	0.0092331	0.051038	1	765	4	2.696
Fam49a	4	0.99074	0.97448	1	19344	0	3.4038	0.0092588	0.051038	1	766	4	3.4038
Procr	4	0.53302	0.70451	1	13545	2	-1.451	0.00928	0.051038	1	767	2	-1.451
Cyb5a	4	0.70094	0.79038	1	15781	1	3.4858	0.0092936	0.051038	1	768	3	3.4858
1700008F21Rik	4	0.060678	0.26455	1	3725	3	-6.1669	0.0093304	0.051038	1	769	1	-6.1669
Rtn4rl2	4	0.55371	0.72009	1	13831	1	4.123	0.0093382	0.051038	1	770	3	4.123
1700011A15Rik	4	0.99063	0.97448	1	19343	0	2.6179	0.0093745	0.051038	1	771	4	2.6179
Rpgrip1l	4	0.88905	0.8615	1	17480	1	2.7665	0.0094312	0.054441	1	772	3	2.7665
Plekhh3	4	0.22175	0.50322	1	8261	2	-0.61387	0.0094396	0.054441	1	773	2	-0.61387
Birc7	4	0.28516	0.55956	1	9874	2	-0.47689	0.0094453	0.054441	1	774	2	-0.47689
Adh7	4	0.48684	0.68093	1	12913	2	-0.3027	0.0094796	0.054441	1	775	2	-0.3027
Scn11a	4	0.83309	0.8309	1	16852	1	0.20959	0.0094816	0.054441	1	776	2	0.20959
Peg10	4	0.99051	0.97448	1	19342	0	2.7545	0.0094928	0.054441	1	777	4	2.7545
Zbtb25	4	0.26572	0.53644	1	9378	1	3.7327	0.0095132	0.054664	1	778	3	3.7327
Fap	4	0.016166	0.12988	1	1142	1	3.5096	0.0095427	0.054665	1	779	3	3.5096
Parp12	4	0.80559	0.82509	1	16561	1	3.9835	0.0095585	0.054882	1	780	3	3.9835
F830016B08Rik	4	0.84367	0.83862	1	16950	1	2.6015	0.0095823	0.054882	1	781	3	2.6015
Gja10	4	0.9904	0.97423	1	19341	0	2.8841	0.0095951	0.054882	1	782	4	2.8841
Cyp39a1	4	0.9904	0.97423	1	19340	0	3.246	0.0095997	0.054882	1	783	4	3.246
Vmn1r171	4	0.84571	0.84137	1	16968	1	0.74754	0.0096117	0.054882	1	784	2	0.74754
Masp2	4	0.99038	0.97423	1	19339	0	2.1856	0.0096215	0.054882	1	785	4	2.1856
Zbtb7b	4	0.69059	0.78578	1	15713	1	2.1964	0.0096327	0.054882	1	786	3	2.1964
Pink1	4	0.3971	0.63214	1	11654	2	-0.30117	0.009652	0.054882	1	787	2	-0.30117
Thbd	4	0.99035	0.97423	1	19338	0	3.4758	0.0096527	0.054882	1	788	4	3.4758
A830018L16Rik	4	0.9903	0.97397	1	19337	0	1.8565	0.0097013	0.055108	1	789	4	1.8565
Pgpep1l	4	0.9903	0.97397	1	19336	0	1.8997	0.0097044	0.055108	1	790	4	1.8997
Aven	4	0.99027	0.97397	1	19335	0	2.6407	0.0097296	0.055108	1	791	4	2.6407
Fam163b	4	0.81908	0.82666	1	16713	1	1.6619	0.0097335	0.055108	1	792	2	1.6619
Mesp2	4	0.48502	0.68041	1	12884	1	3.051	0.0097504	0.055108	1	793	3	3.051
Ikzf5	4	0.95037	0.89813	1	18451	0	3.7244	0.009762	0.055108	1	794	3	3.7244
Spns3	4	0.89805	0.86606	1	17599	1	2.6739	0.0097839	0.055108	1	795	3	2.6739
Tmem5	4	0.99021	0.97397	1	19334	0	2.9613	0.0097863	0.055108	1	796	4	2.9613
Nme8	4	0.92127	0.87993	1	17927	1	3.5352	0.0098257	0.055343	1	797	3	3.5352
Ccar2	4	0.99017	0.97397	1	19333	0	1.7119	0.0098321	0.055343	1	798	4	1.7119
Tfcp2l1	4	0.82585	0.82857	1	16782	1	3.3794	0.0098334	0.055343	1	799	3	3.3794
Clic3	4	0.32702	0.58802	1	10730	1	3.2532	0.0098359	0.055343	1	800	3	3.2532
Slc2a1	4	0.99016	0.97397	1	19332	0	3.4112	0.0098417	0.055343	1	801	4	3.4112
Ccr3	4	0.44754	0.65797	1	12379	1	2.6912	0.0098434	0.055343	1	802	3	2.6912
Rasal3	4	0.90167	0.86683	1	17648	1	4.2583	0.0098842	0.056052	1	803	3	4.2583
Cyba	4	0.99011	0.97369	1	19331	0	2.357	0.0098861	0.056052	1	804	4	2.357
Pcdhb15	4	0.99011	0.97369	1	19330	0	2.5441	0.0098893	0.056052	1	805	4	2.5441
Git1	4	0.22131	0.50138	1	8247	1	3.4019	0.00989	0.056052	1	806	3	3.4019
Acy1	4	0.21203	0.49216	1	8009	1	-0.20761	0.009935	0.056052	1	807	2	-0.20761
Olfr873	4	0.91278	0.87301	1	17798	1	3.4825	0.0099416	0.056052	1	808	3	3.4825
Osbpl5	4	0.99005	0.97368	1	19328	0	2.1599	0.0099451	0.056052	1	809	4	2.1599
Phldb1	4	0.9816	0.95704	1	19098	0	3.8379	0.0099649	0.056281	1	810	4	3.8379
Arhgap19	4	0.99003	0.97342	1	19327	0	2.2933	0.0099675	0.056281	1	811	4	2.2933
Itga2b	4	0.99002	0.97342	1	19326	0	2.0251	0.0099755	0.056281	1	812	4	2.0251
Qrfpr	4	0.64859	0.76479	1	15147	1	2.324	0.0099836	0.056281	1	813	2	2.324
Amigo3	4	0.37682	0.61547	1	11382	2	0.43424	0.0099854	0.056281	1	814	2	0.43424
Oasl2	4	0.15903	0.43315	1	6643	1	3.3011	0.0099856	0.056281	1	815	3	3.3011
Mcidas	4	0.62712	0.75503	1	14841	1	4.1687	0.0099954	0.056281	1	816	3	4.1687
Tlk1	4	0.99	0.97342	1	19325	0	1.594	0.010004	0.056281	1	817	4	1.594
Ccl20	4	0.91099	0.87221	1	17769	1	1.3111	0.010036	0.056504	1	818	3	1.3111
Flii	4	0.98786	0.9676	1	19265	0	3.2599	0.010036	0.056504	1	819	4	3.2599
Dos	4	0.98995	0.97317	1	19324	0	1.7198	0.010051	0.056504	1	820	4	1.7198
Slc35d2	4	0.12932	0.39154	1	5860	1	2.6272	0.01006	0.056504	1	821	2	2.6272
Spam1	4	0.74144	0.80112	1	16041	1	3.336	0.010071	0.056504	1	822	3	3.336
Mplkip	4	0.97821	0.95014	1	19014	0	3.5246	0.010084	0.056504	1	823	4	3.5246
Sncg	4	0.9899	0.97317	1	19323	0	2.7659	0.010096	0.056848	1	824	4	2.7659
Slc44a1	4	0.84423	0.83901	1	16954	1	3.4295	0.010129	0.057071	1	825	3	3.4295
Stxbp3a	4	0.61642	0.75075	1	14677	1	3.3132	0.010132	0.057071	1	826	3	3.3132
Olfr1012	4	0.98984	0.97291	1	19322	0	2.4195	0.010159	0.057071	1	827	4	2.4195
Zfp710	4	0.98984	0.97291	1	19321	0	2.8347	0.010163	0.057072	1	828	4	2.8347
Zfp867	4	0.98983	0.97291	1	19320	0	2.437	0.010171	0.057072	1	829	4	2.437
Haus6	3	0.20181	0.4229	1	7755	2	-6.0337	0.010185	0.042537	1	830	1	-6.0337
Tcf20	4	0.98754	0.96698	1	19252	0	3.856	0.010189	0.057072	1	831	4	3.856
Prelid2	4	0.97123	0.93651	1	18834	0	3.0359	0.010218	0.057322	1	832	3	3.0359
Fzd9	4	0.98539	0.96343	1	19186	0	2.8671	0.010231	0.057322	1	833	4	2.8671
Selplg	3	0.95941	0.91883	1	18599	0	4.41	0.010245	0.043063	1	834	3	4.41
Pdha1	4	0.87231	0.85382	1	17264	1	3.6717	0.010284	0.057322	1	835	3	3.6717
Rfxank	4	0.98971	0.97263	1	19319	0	3.2975	0.01029	0.057323	1	836	4	3.2975
Mt3	4	0.98971	0.97263	1	19318	0	2.3552	0.010293	0.057323	1	837	4	2.3552
Gabrg3	4	0.97339	0.94245	1	18886	0	3.6067	0.010295	0.057323	1	838	3	3.6067
Ovch2	4	0.9897	0.97263	1	19317	0	2.0658	0.010301	0.057323	1	839	4	2.0658
Scp2	4	0.58788	0.7338	1	14294	2	0.11459	0.010326	0.057323	1	840	2	0.11459
Prkg1	4	0.86173	0.8476	1	17144	1	1.8009	0.010338	0.057323	1	841	3	1.8009
Ucp3	4	0.89341	0.86371	1	17537	1	3.6877	0.010371	0.057801	1	842	3	3.6877
Myo7a	4	0.98766	0.96698	1	19258	0	3.5374	0.01038	0.058038	1	843	4	3.5374
Opn1sw	4	0.98957	0.97235	1	19314	0	2.7712	0.010425	0.058398	1	844	4	2.7712
Tigd2	4	0.84981	0.84291	1	17010	1	1.6578	0.010439	0.058398	1	845	3	1.6578
9430016H08Rik	4	0.22643	0.50467	1	8367	3	-5.0612	0.010489	0.058628	1	846	1	-5.0612
Dusp15	4	0.80667	0.8255	1	16571	1	3.1558	0.010494	0.058628	1	847	3	3.1558
Nr2f6	4	0.66163	0.77042	1	15300	1	3.4846	0.01051	0.058628	1	848	3	3.4846
Havcr1	4	0.91659	0.87453	1	17854	1	3.3052	0.010524	0.058628	1	849	3	3.3052
Pak4	4	0.98947	0.97208	1	19312	0	2.6901	0.010526	0.058628	1	850	4	2.6901
Gcc1	4	0.41605	0.64507	1	11946	2	-0.36189	0.010548	0.058628	1	851	2	-0.36189
Mettl6	4	0.41801	0.64507	1	11978	1	3.0323	0.010596	0.059461	1	852	3	3.0323
Serpina3k	4	0.98936	0.97153	1	19311	0	1.5668	0.010635	0.060158	1	853	4	1.5668
Sectm1b	4	0.8738	0.85382	1	17286	1	3.1198	0.010669	0.060409	1	854	3	3.1198
Gm3750	4	0.38358	0.61847	1	11469	2	-2.064	0.01069	0.060409	1	855	2	-2.064
Olfr891	4	0.31963	0.58363	1	10635	2	-0.47285	0.010705	0.060409	1	856	2	-0.47285
Col4a4	4	0.98927	0.97153	1	19310	0	2.8158	0.010726	0.060409	1	857	4	2.8158
Pcp4l1	4	0.97112	0.93546	1	18830	0	3.9453	0.010727	0.060409	1	858	3	3.9453
Nup37	4	0.38382	0.61847	1	11471	2	-2.0372	0.010741	0.060409	1	859	2	-2.0372
Cela1	4	0.54416	0.7145	1	13698	1	3.4839	0.010759	0.060409	1	860	3	3.4839
Iltifb	4	0.98922	0.97153	1	19309	0	1.186	0.010775	0.060409	1	861	4	1.186
Acmsd	4	0.98922	0.97153	1	19308	0	2.7341	0.010782	0.060409	1	862	4	2.7341
Krt73	4	0.98921	0.97153	1	19307	0	2.3865	0.010786	0.060409	1	863	4	2.3865
Mfsd12	4	0.61725	0.75075	1	14689	1	3.7952	0.010788	0.060409	1	864	3	3.7952
Dxo	4	0.037853	0.21742	1	2465	3	-4.6162	0.010791	0.060409	1	865	1	-4.6162
Vmn2r2	4	0.9892	0.97153	1	19306	0	2.2177	0.010796	0.060409	1	866	4	2.2177
Phc2	4	0.9892	0.97153	1	19305	0	2.6958	0.010799	0.060409	1	867	4	2.6958
Chst10	4	0.98918	0.97153	1	19304	0	2.0566	0.01082	0.060409	1	868	4	2.0566
Fam83h	4	0.98918	0.97153	1	19303	0	2.4843	0.010825	0.060409	1	869	4	2.4843
Hdgfl1	4	0.83224	0.83051	1	16845	1	1.3636	0.010841	0.060409	1	870	2	1.3636
Six6	4	0.98916	0.97153	1	19302	0	1.4652	0.010842	0.060409	1	871	4	1.4652
Klra1	4	0.88286	0.85765	1	17408	1	3.7033	0.010857	0.060409	1	872	3	3.7033
Npc1	4	0.70011	0.79038	1	15774	1	3.1163	0.010868	0.060409	1	873	3	3.1163
Hoxc13	4	0.98913	0.97153	1	19300	0	2.0901	0.010873	0.060409	1	874	4	2.0901
Olfr206	4	0.41545	0.64507	1	11937	1	3.5776	0.010909	0.060922	1	875	3	3.5776
Uprt	4	0.92354	0.8807	1	17961	1	3.454	0.010912	0.060922	1	876	3	3.454
Ap1m2	4	0.98908	0.97094	1	19298	0	1.8585	0.01092	0.060922	1	877	4	1.8585
Angpt4	4	0.82404	0.82819	1	16761	1	2.5122	0.010942	0.060922	1	878	3	2.5122
Olfr1240	4	0.013758	0.11751	1	990	2	-0.24122	0.010942	0.060922	1	879	2	-0.24122
Sprr2b	4	0.98122	0.95551	1	19088	0	3.532	0.010961	0.060922	1	880	4	3.532
Tgfbr1	4	0.98903	0.97094	1	19296	0	2.709	0.010965	0.060922	1	881	4	2.709
Pde6b	4	0.97389	0.94245	1	18907	0	3.092	0.010973	0.060922	1	882	4	3.092
Gimap8	4	0.98901	0.97094	1	19295	0	1.9296	0.010987	0.060922	1	883	4	1.9296
Rab20	4	0.36772	0.6117	1	11255	2	1.513	0.010998	0.060922	1	884	2	1.513
Napepld	4	0.59461	0.73617	1	14377	1	3.1084	0.011002	0.061175	1	885	3	3.1084
Fam3a	4	0.31494	0.58178	1	10571	2	-0.34013	0.01101	0.061175	1	886	2	-0.34013
Tsc22d2	4	0.62159	0.75187	1	14750	2	1.5208	0.011022	0.061175	1	887	2	1.5208
Sec14l5	4	0.98897	0.97064	1	19294	0	1.5564	0.011025	0.061175	1	888	4	1.5564
Slc24a5	4	0.58815	0.7338	1	14299	1	3.249	0.011034	0.061176	1	889	3	3.249
Olfr248	4	0.11171	0.36083	1	5343	1	2.4048	0.011043	0.061176	1	890	2	2.4048
Pik3c2a	4	0.92517	0.88145	1	17989	1	3.4222	0.01109	0.06206	1	891	3	3.4222
0610009B22Rik	3	0.13989	0.35857	1	6147	1	-4.0155	0.011092	0.048226	1	892	1	-4.0155
Szt2	4	0.85807	0.84488	1	17105	1	3.0858	0.011093	0.06206	1	893	3	3.0858
S100a8	4	0.76277	0.80655	1	16219	1	2.7107	0.011102	0.06206	1	894	3	2.7107
Lgals7	4	0.44479	0.65739	1	12339	2	0.2997	0.011108	0.06206	1	895	2	0.2997
Dkk3	4	0.62192	0.75187	1	14754	2	0.79809	0.011143	0.06233	1	896	2	0.79809
Olfr1032	4	0.074864	0.29338	1	4230	2	-1.0092	0.011158	0.06233	1	897	2	-1.0092
Krt42	4	0.9888	0.97003	1	19292	0	2.7613	0.011201	0.06233	1	898	4	2.7613
Tex15	4	0.39848	0.6331	1	11669	1	3.185	0.011219	0.06233	1	899	3	3.185
9030617O03Rik	3	0.98876	0.97448	1	19291	0	3.0049	0.011238	0.049239	1	900	3	3.0049
Slc6a1	4	0.50002	0.68624	1	13091	2	-0.24462	0.011251	0.06233	1	901	2	-0.24462
Aifm2	4	0.52728	0.70157	1	13464	1	3.6358	0.011275	0.062556	1	902	3	3.6358
Nudt13	4	0.98872	0.97003	1	19290	0	3.6491	0.011276	0.062556	1	903	4	3.6491
Manba	4	0.42914	0.64893	1	12118	1	1.6741	0.011294	0.062556	1	904	2	1.6741
Epn2	4	0.98869	0.97003	1	19289	0	2.269	0.011306	0.062556	1	905	4	2.269
Eri1	4	0.78062	0.81581	1	16348	1	3.3578	0.011306	0.062556	1	906	3	3.3578
E2f6	4	0.16435	0.43939	1	6794	2	-0.79147	0.011331	0.062805	1	907	2	-0.79147
Vmn2r73	4	0.90377	0.86683	1	17673	1	-0.42466	0.011345	0.063052	1	908	1	-0.42466
Olfr733	4	0.7199	0.79731	1	15896	1	3.4044	0.011346	0.063052	1	909	3	3.4044
Atp12a	4	0.62213	0.75187	1	14757	1	3.8564	0.011346	0.063052	1	910	3	3.8564
Ldlrad3	4	0.43976	0.65348	1	12253	1	3.0019	0.011369	0.063399	1	911	3	3.0019
Cdca3	4	0.84389	0.83901	1	16952	1	2.9546	0.011395	0.063655	1	912	3	2.9546
Olfr25	4	0.98656	0.96473	1	19224	0	3.8165	0.0114	0.063655	1	913	4	3.8165
Elovl2	4	0.9886	0.96944	1	19287	0	1.9708	0.011403	0.063655	1	914	4	1.9708
Ppia	4	0.93668	0.89057	1	18185	1	3.3444	0.01141	0.063655	1	915	3	3.3444
Glyr1	4	0.98857	0.96944	1	19286	0	1.6903	0.011426	0.064028	1	916	4	1.6903
Gpc1	4	0.91665	0.87454	1	17857	1	2.4644	0.011445	0.064029	1	917	3	2.4644
Olfr371	4	0.82484	0.82819	1	16771	1	2.967	0.011458	0.064282	1	918	3	2.967
Pcnxl4	4	0.89487	0.86451	1	17555	1	3.1118	0.011475	0.064283	1	919	3	3.1118
Ascl4	4	0.29073	0.56381	1	10013	2	-0.93202	0.011496	0.064539	1	920	2	-0.93202
BC049730	4	0.54967	0.71791	1	13776	2	-1.0042	0.011546	0.065163	1	921	2	-1.0042
Nprl3	3	0.98844	0.97421	1	19285	0	3.0406	0.01156	0.04981	1	922	3	3.0406
Galnt13	4	0.98841	0.96944	1	19284	0	2.1888	0.011587	0.065163	1	923	4	2.1888
Nanos2	4	0.2128	0.4932	1	8031	1	2.9092	0.011594	0.065164	1	924	3	2.9092
Dpysl4	4	0.94265	0.89509	1	18303	0	3.2212	0.011596	0.065164	1	925	3	3.2212
Mmp14	4	0.98838	0.96944	1	19283	0	1.797	0.011619	0.065164	1	926	4	1.797
Vmn2r110	4	0.98836	0.96944	1	19282	0	3.2741	0.011637	0.065417	1	927	4	3.2741
Scyl1	4	0.53651	0.70543	1	13598	1	4.0363	0.011644	0.065417	1	928	3	4.0363
1700010I14Rik	4	0.46385	0.66665	1	12588	2	0.1453	0.011646	0.065417	1	929	2	0.1453
Gm14459	4	0.9192	0.87533	1	17900	1	3.2782	0.011688	0.065417	1	930	3	3.2782
Lilrb4	4	0.85363	0.8437	1	17050	1	3.4206	0.011691	0.065417	1	931	3	3.4206
Tmem248	4	0.55624	0.72164	1	13862	1	3.9237	0.011701	0.068558	1	932	3	3.9237
Smr3a	4	0.98829	0.96913	1	19281	0	2.6229	0.011714	0.068824	1	933	4	2.6229
Pmaip1	4	0.98827	0.96883	1	19280	0	2.3847	0.011734	0.069079	1	934	4	2.3847
Atf6	4	0.078667	0.30444	1	4350	3	-5.1552	0.011747	0.06908	1	935	1	-5.1552
Tmem158	4	0.87503	0.85382	1	17301	1	2.4877	0.011752	0.06961	1	936	2	2.4877
Zdhhc5	4	0.98824	0.9682	1	19279	0	2.1887	0.011758	0.06961	1	937	4	2.1887
3110043O21Rik	4	0.74834	0.80269	1	16093	1	2.954	0.011763	0.06961	1	938	3	2.954
Per2	4	0.21813	0.49916	1	8176	1	3.5351	0.011769	0.06961	1	939	3	3.5351
1700088E04Rik	4	0.94301	0.89509	1	18309	0	2.4129	0.011777	0.06961	1	940	2	2.4129
Unc5c	4	0.98821	0.9682	1	19278	0	3.3615	0.01179	0.06961	1	941	4	3.3615
A630033H20Rik	4	0.98821	0.9682	1	19277	0	4.1491	0.011794	0.06961	1	942	4	4.1491
Gypa	4	0.046994	0.23529	1	2970	3	-4.8125	0.011797	0.06961	1	943	1	-4.8125
Ppp1cc	4	0.9882	0.9682	1	19276	0	2.6244	0.011798	0.06961	1	944	4	2.6244
Olfr651	4	0.98819	0.9682	1	19275	0	2.6692	0.011807	0.06961	1	945	4	2.6692
Sult2a6	4	0.98819	0.9682	1	19274	0	1.458	0.011809	0.06961	1	946	4	1.458
Tpra1	4	0.98818	0.9682	1	19273	0	3.0981	0.01182	0.06961	1	947	4	3.0981
Hmgcll1	4	0.91247	0.87221	1	17794	1	3.5972	0.011855	0.069984	1	948	3	3.5972
Isoc1	4	0.98814	0.9682	1	19272	0	2.5092	0.011856	0.069984	1	949	4	2.5092
Nucks1	4	0.98814	0.9682	1	19271	0	2.4997	0.011863	0.069984	1	950	4	2.4997
Actr5	4	0.98812	0.9682	1	19270	0	2.7409	0.011876	0.069984	1	951	4	2.7409
Mmp16	4	0.56286	0.72474	1	13963	1	3.7553	0.01189	0.069984	1	952	3	3.7553
Pcdhb9	4	0.854	0.8437	1	17056	1	1.7427	0.011898	0.069984	1	953	2	1.7427
Ace2	4	0.98809	0.9682	1	19269	0	1.3891	0.011913	0.069984	1	954	4	1.3891
Cmtm8	4	0.35125	0.60031	1	11027	1	4.4025	0.011923	0.07025	1	955	3	4.4025
Slc11a2	4	0.94861	0.89737	1	18413	0	3.1093	0.011934	0.07025	1	956	3	3.1093
Scaf1	4	0.8827	0.85765	1	17407	1	3.3366	0.011948	0.070495	1	957	3	3.3366
Olfr11	4	0.033076	0.20682	1	2153	3	-4.4556	0.011999	0.070495	1	958	1	-4.4556
Rheb	4	0.98414	0.96139	1	19158	0	3.8763	0.012051	0.070495	1	959	4	3.8763
Olfr109	4	0.25522	0.53027	1	9113	1	3.0121	0.012057	0.070495	1	960	3	3.0121
Lrrcc1	4	0.98794	0.9676	1	19268	0	3.3412	0.012063	0.070495	1	961	4	3.3412
Col6a2	4	0.98791	0.9676	1	19267	0	1.9496	0.012087	0.070495	1	962	4	1.9496
Ccdc127	4	0.90156	0.86683	1	17645	1	2.3539	0.012109	0.070495	1	963	2	2.3539
Gnaz	4	0.85792	0.84448	1	17101	1	0.79822	0.012149	0.070876	1	964	2	0.79822
Adap1	4	0.98784	0.9676	1	19264	0	2.459	0.01216	0.070876	1	965	4	2.459
Mustn1	4	0.98783	0.9676	1	19262	0	3.0025	0.012167	0.070876	1	966	4	3.0025
Mitf	4	0.2822	0.55659	1	9790	1	3.9935	0.012192	0.071147	1	967	3	3.9935
Acat3	4	0.5509	0.71791	1	13791	2	-2.7132	0.0122	0.071147	1	968	1	-2.7132
Nudt4	4	0.98779	0.96728	1	19261	0	1.5312	0.012208	0.071147	1	969	4	1.5312
Bgn	4	0.44402	0.65679	1	12321	1	3.4157	0.01222	0.071147	1	970	3	3.4157
AI987944	4	0.9295	0.88373	1	18057	1	3.1318	0.012229	0.071147	1	971	3	3.1318
Gja5	4	0.57586	0.72833	1	14145	2	-0.11169	0.012231	0.071147	1	972	2	-0.11169
Disp1	4	0.98775	0.96728	1	19260	0	1.7	0.012247	0.071147	1	973	4	1.7
Eea1	4	0.063949	0.27125	1	3866	1	2.578	0.01225	0.071147	1	974	3	2.578
Gp5	4	0.98771	0.96698	1	19259	0	3.2752	0.01229	0.071776	1	975	4	3.2752
Vrk2	4	0.65021	0.76648	1	15164	1	3.7887	0.012309	0.07217	1	976	3	3.7887
2010106E10Rik	4	0.41241	0.64445	1	11894	1	3.8035	0.012342	0.07217	1	977	3	3.8035
Olfr632	4	0.51253	0.69231	1	13293	1	3.25	0.012374	0.07217	1	978	3	3.25
1700074P13Rik	4	0.97782	0.94928	1	19007	0	3.0913	0.012386	0.07217	1	979	4	3.0913
Pth2r	4	0.98761	0.96698	1	19257	0	1.6892	0.012388	0.07217	1	980	4	1.6892
Mapk1ip1l	4	0.9876	0.96698	1	19256	0	2.1456	0.012396	0.07217	1	981	4	2.1456
Ccl17	4	0.85085	0.8437	1	17022	1	3.0858	0.012398	0.07217	1	982	3	3.0858
Slc36a1	4	0.98757	0.96698	1	19254	0	3.0159	0.012433	0.072558	1	983	4	3.0159
Sowahb	4	0.98756	0.96698	1	19253	0	1.548	0.012435	0.072559	1	984	4	1.548
Apool	4	0.78111	0.81581	1	16352	1	-0.74348	0.012451	0.072559	1	985	3	-0.74348
Scn4b	4	0.97863	0.951	1	19026	0	3.3865	0.012464	0.072797	1	986	4	3.3865
Rdh16	4	0.59273	0.73529	1	14358	1	3.1481	0.012506	0.072797	1	987	3	3.1481
Rltpr	4	0.98749	0.96698	1	19251	0	2.696	0.012507	0.072797	1	988	4	2.696
Ubxn2b	4	0.98625	0.96473	1	19218	0	3.1834	0.012509	0.072797	1	989	4	3.1834
Psg26	4	0.42085	0.64568	1	12012	2	-0.82443	0.012552	0.072797	1	990	2	-0.82443
Retn	4	0.98742	0.96698	1	19249	0	1.957	0.012583	0.072797	1	991	4	1.957
Ttc24	4	0.53852	0.71047	1	13627	1	3.2806	0.012596	0.072797	1	992	3	3.2806
Stbd1	4	0.11957	0.37757	1	5588	2	-0.93537	0.012608	0.072797	1	993	2	-0.93537
Ccdc60	4	0.21898	0.49986	1	8193	2	-0.89811	0.012621	0.072797	1	994	2	-0.89811
Aste1	4	0.98735	0.96698	1	19248	0	2.0597	0.01265	0.072797	1	995	4	2.0597
Arhgdig	4	0.77675	0.81426	1	16321	1	3.2061	0.012656	0.072797	1	996	3	3.2061
Pla2g6	4	0.98734	0.96698	1	19247	0	2.6721	0.01266	0.072797	1	997	4	2.6721
Edem1	4	0.3172	0.58302	1	10603	1	3.2459	0.012662	0.072797	1	998	3	3.2459
Agxt	4	0.98731	0.96667	1	19246	0	2.7086	0.01269	0.073055	1	999	4	2.7086
Cyp2e1	4	0.9873	0.96667	1	19245	0	2.3767	0.0127	0.073055	1	1000	4	2.3767
Scaf8	4	0.38375	0.61847	1	11470	1	2.8848	0.012702	0.073055	1	1001	3	2.8848
Tnfaip8	4	0.98727	0.96667	1	19244	0	1.4284	0.012729	0.073056	1	1002	4	1.4284
Zxdb	4	0.97739	0.94928	1	18990	0	3.3096	0.012749	0.073056	1	1003	4	3.3096
Olfr854	4	0.98721	0.96633	1	19243	0	1.3809	0.012789	0.073354	1	1004	4	1.3809
Sall3	4	0.30078	0.57463	1	10250	1	3.4752	0.012807	0.073354	1	1005	3	3.4752
BC026585	4	0.98715	0.96633	1	19242	0	2.7455	0.012847	0.073354	1	1006	4	2.7455
Retsat	4	0.86749	0.85146	1	17214	1	3.3504	0.012853	0.073354	1	1007	3	3.3504
Btn1a1	4	0.98713	0.96633	1	19241	0	2.5779	0.012872	0.07361	1	1008	4	2.5779
Gm6902	4	0.18135	0.45678	1	7252	1	3.0794	0.012883	0.07361	1	1009	3	3.0794
Slc19a3	4	0.98712	0.96633	1	19240	0	2.4324	0.012883	0.07361	1	1010	4	2.4324
Rab9b	4	0.78302	0.81735	1	16372	1	3.3944	0.01289	0.07361	1	1011	3	3.3944
Olfr1110	4	0.98711	0.96633	1	19239	0	2.8945	0.012895	0.07361	1	1012	4	2.8945
Fam89a	4	0.94579	0.89584	1	18356	0	2.9083	0.012904	0.07361	1	1013	3	2.9083
Bnip3	4	0.94482	0.89584	1	18346	0	3.1075	0.012914	0.07361	1	1014	3	3.1075
Mettl21e	4	0.96609	0.92199	1	18723	0	3.8526	0.012926	0.07361	1	1015	3	3.8526
Zfp68	4	0.98706	0.96633	1	19238	0	1.6405	0.012942	0.07361	1	1016	4	1.6405
Slc6a11	4	0.28262	0.55659	1	9804	1	3.4715	0.012956	0.073843	1	1017	3	3.4715
Col6a6	4	0.987	0.96601	1	19237	0	2.4731	0.012998	0.074116	1	1018	4	2.4731
B930041F14Rik	4	0.56988	0.72775	1	14058	1	0.7368	0.013003	0.074116	1	1019	2	0.7368
Tdrd1	4	0.063241	0.27124	1	3842	2	-3.7189	0.013004	0.074116	1	1020	1	-3.7189
Ppfia3	4	0.98698	0.96601	1	19236	0	2.3888	0.013022	0.074116	1	1021	4	2.3888
Snx10	4	0.98697	0.96601	1	19235	0	1.8731	0.01303	0.074116	1	1022	4	1.8731
Try10	4	0.34452	0.5979	1	10932	2	-1.6706	0.013054	0.074116	1	1023	2	-1.6706
Slc10a6	4	0.95171	0.89813	1	18468	0	3.7017	0.013056	0.074116	1	1024	3	3.7017
Phactr2	4	0.85052	0.84291	1	17018	1	3.8204	0.013098	0.074349	1	1025	3	3.8204
Krtap1-4	4	0.71106	0.79424	1	15841	1	3.8312	0.013103	0.074349	1	1026	3	3.8312
Reln	4	0.97695	0.94887	1	18978	0	2.0917	0.013105	0.074349	1	1027	4	2.0917
Qrich1	4	0.36616	0.61108	1	11233	1	3.5774	0.013109	0.074349	1	1028	3	3.5774
Slc29a4	4	0.20178	0.48278	1	7748	1	3.3297	0.013116	0.07435	1	1029	3	3.3297
Olfr1173	4	0.98686	0.96601	1	19233	0	1.683	0.013143	0.074608	1	1030	4	1.683
Pex3	4	0.74282	0.80112	1	16051	1	3.4021	0.013178	0.074608	1	1031	3	3.4021
Vmn1r70	4	0.65583	0.76763	1	15236	1	2.9468	0.013193	0.074876	1	1032	3	2.9468
Orm3	4	0.9868	0.9657	1	19231	0	2.5493	0.013197	0.074876	1	1033	4	2.5493
Serpinb6d	4	0.33637	0.59177	1	10841	2	-0.42261	0.013203	0.074876	1	1034	2	-0.42261
Rbck1	4	0.10134	0.34742	1	5044	2	-0.58376	0.013236	0.074876	1	1035	2	-0.58376
Rtn4rl1	4	0.97246	0.94052	1	18857	0	3.0009	0.013255	0.074876	1	1036	3	3.0009
Snx8	4	0.98381	0.9607	1	19153	0	3.4686	0.013265	0.074876	1	1037	4	3.4686
Slc10a3	4	0.36681	0.61108	1	11242	1	3.7049	0.013276	0.075143	1	1038	3	3.7049
Agbl5	4	0.71662	0.79731	1	15875	1	3.3611	0.013287	0.075143	1	1039	3	3.3611
Mapk6	4	0.96166	0.912	1	18643	0	4.0363	0.01329	0.075143	1	1040	3	4.0363
Dpy30	4	0.98671	0.96538	1	19229	0	2.2162	0.013294	0.075143	1	1041	4	2.2162
Cml5	4	0.82752	0.82895	1	16802	1	1.9903	0.013306	0.075143	1	1042	3	1.9903
Adh5	4	0.90762	0.86912	1	17717	1	2.8174	0.013356	0.075144	1	1043	3	2.8174
Lamc1	4	0.98407	0.96139	1	19156	0	3.1044	0.013364	0.075144	1	1044	4	3.1044
4930468A15Rik	4	0.98662	0.96538	1	19227	0	1.5268	0.013375	0.07539	1	1045	4	1.5268
Them6	4	0.98662	0.96505	1	19226	0	2.8824	0.013381	0.075666	1	1046	4	2.8824
Fam122c	4	0.9866	0.96505	1	19225	0	2.0352	0.013395	0.075666	1	1047	4	2.0352
Acvrl1	4	0.45905	0.66311	1	12529	1	2.8946	0.013397	0.075666	1	1048	3	2.8946
Comp	4	0.069467	0.27806	1	4064	1	-0.67638	0.013406	0.075939	1	1049	2	-0.67638
Dcdc2c	4	0.54261	0.71337	1	13677	1	3.4449	0.013431	0.075939	1	1050	3	3.4449
Foxg1	4	0.98655	0.96473	1	19223	0	2.7709	0.013445	0.075939	1	1051	4	2.7709
Zfp414	4	0.26096	0.53172	1	9251	3	-3.7422	0.013456	0.075939	1	1052	1	-3.7422
Enpp6	4	0.091687	0.33204	1	4763	2	-1.0776	0.013478	0.076212	1	1053	2	-1.0776
Klrb1b	4	0.9865	0.96473	1	19222	0	2.3375	0.013504	0.076212	1	1054	4	2.3375
Tbc1d5	4	0.86486	0.8484	1	17184	1	3.1129	0.013508	0.076212	1	1055	3	3.1129
Ahrr	4	0.3492	0.59908	1	10997	2	1.7585	0.013518	0.076212	1	1056	2	1.7585
Rab11a	4	0.11598	0.3698	1	5481	1	3.2115	0.01353	0.076212	1	1057	3	3.2115
Omp	4	0.0034718	0.043083	1	294	1	2.9299	0.013593	0.076213	1	1058	3	2.9299
Tmem52	4	0.1572	0.43146	1	6601	2	-2.6953	0.013607	0.076213	1	1059	2	-2.6953
E330017A01Rik	4	0.22131	0.50138	1	8248	1	3.2251	0.013612	0.076213	1	1060	3	3.2251
Mdm1	4	0.98634	0.96473	1	19220	0	2.6617	0.013655	0.076213	1	1061	4	2.6617
Chmp7	4	0.9863	0.96473	1	19219	0	2.8718	0.013699	0.076614	1	1062	4	2.8718
Bpifb3	4	0.29008	0.56381	1	9992	1	2.4512	0.013701	0.076614	1	1063	3	2.4512
Bsdc1	4	0.88993	0.8615	1	17491	1	-1.1943	0.013707	0.076878	1	1064	2	-1.1943
Id2	4	0.96723	0.92319	1	18745	0	2.74	0.013722	0.076878	1	1065	3	2.74
Skint3	4	0.96719	0.92319	1	18744	0	3.0008	0.013729	0.076878	1	1066	3	3.0008
Olfr1504	4	0.98624	0.96473	1	19217	0	2.4622	0.013761	0.076878	1	1067	4	2.4622
Lpar1	4	0.76926	0.80961	1	16269	1	3.3416	0.013799	0.077533	1	1068	3	3.3416
Srrm1	4	0.60918	0.74356	1	14574	2	-1.2137	0.013808	0.077534	1	1069	2	-1.2137
Dcbld2	4	0.97782	0.94928	1	19008	0	3.7514	0.013809	0.077534	1	1070	4	3.7514
Palm3	4	0.34185	0.59727	1	10902	2	-0.47715	0.013844	0.077801	1	1071	2	-0.47715
Snx30	4	0.083641	0.31343	1	4501	3	-3.7038	0.013858	0.077801	1	1072	1	-3.7038
Poc1b	4	0.94586	0.89584	1	18357	0	3.8511	0.013863	0.077801	1	1073	3	3.8511
Stoml3	4	0.98613	0.96473	1	19216	0	1.6812	0.013869	0.077801	1	1074	4	1.6812
Tuba3a	4	0.98612	0.96473	1	19215	0	1.697	0.013877	0.077801	1	1075	4	1.697
Ttll1	4	0.70055	0.79038	1	15779	1	3.1618	0.013882	0.077801	1	1076	3	3.1618
Luzp1	4	0.9861	0.96473	1	19214	0	2.0211	0.013898	0.077801	1	1077	4	2.0211
Trmt1	4	0.53367	0.70451	1	13552	2	-2.1491	0.013908	0.077801	1	1078	2	-2.1491
Tmem205	4	0.0849	0.31343	1	4536	1	3.4338	0.013913	0.077801	1	1079	3	3.4338
Gm11757	4	0.74769	0.80269	1	16089	1	3.2934	0.013921	0.077801	1	1080	3	3.2934
Aph1a	4	0.98607	0.96473	1	19213	0	2.9408	0.013931	0.078182	1	1081	4	2.9408
Olfr694	4	0.98604	0.96473	1	19212	0	2.0064	0.013955	0.078183	1	1082	4	2.0064
Hyal1	4	0.98604	0.96473	1	19211	0	1.6273	0.013958	0.078183	1	1083	4	1.6273
Klri1	4	0.036977	0.21699	1	2413	2	-1.1779	0.013968	0.078458	1	1084	2	-1.1779
Vangl2	4	0.98603	0.9644	1	19210	0	2.5715	0.01397	0.078458	1	1085	4	2.5715
Rraga	4	0.98601	0.9644	1	19209	0	2.4448	0.013995	0.078458	1	1086	4	2.4448
Ap2b1	4	0.96247	0.91328	1	18659	0	3.2403	0.014007	0.078868	1	1087	3	3.2403
Tarsl2	4	0.93591	0.8898	1	18168	1	2.2711	0.014009	0.078868	1	1088	3	2.2711
Esp4	4	0.98598	0.9644	1	19208	0	1.6596	0.014019	0.078868	1	1089	4	1.6596
Olfr746	4	0.81659	0.82666	1	16686	1	3.3312	0.014023	0.078868	1	1090	3	3.3312
Hsd3b7	4	0.039665	0.22042	1	2574	1	3.3882	0.014059	0.078869	1	1091	3	3.3882
Sertad4	4	0.98594	0.9644	1	19207	0	1.9666	0.014065	0.078869	1	1092	4	1.9666
Rbm41	4	0.59894	0.73885	1	14435	1	2.9946	0.014065	0.078869	1	1093	3	2.9946
Pcdha5	4	0.46307	0.66543	1	12581	1	0.49973	0.014071	0.078869	1	1094	2	0.49973
Echs1	4	0.98593	0.9644	1	19206	0	2.1507	0.014071	0.078869	1	1095	4	2.1507
Cdc20b	4	0.98592	0.9644	1	19205	0	3.098	0.01408	0.078869	1	1096	4	3.098
Gda	4	0.98591	0.9644	1	19204	0	1.8789	0.014094	0.078869	1	1097	4	1.8789
Phactr1	4	0.95023	0.89813	1	18446	0	2.9449	0.014094	0.078869	1	1098	3	2.9449
BC068281	4	0.9859	0.9644	1	19203	0	2.3515	0.014096	0.078869	1	1099	4	2.3515
Ren1	4	0.98589	0.9644	1	19202	0	1.6891	0.014113	0.081887	1	1100	4	1.6891
Vpreb2	4	0.82988	0.82975	1	16825	1	3.8105	0.014126	0.081887	1	1101	3	3.8105
A630023A22Rik	4	0.97268	0.94149	1	18865	0	3.0964	0.014136	0.081887	1	1102	3	3.0964
Baz2a	4	0.51918	0.69682	1	13379	1	3.2036	0.01414	0.081887	1	1103	3	3.2036
Thsd7a	4	0.6647	0.77122	1	15346	2	-0.00695	0.014159	0.081887	1	1104	2	-0.00695
Cntn5	4	0.72289	0.79807	1	15920	1	3.5699	0.014175	0.081887	1	1105	3	3.5699
Cav2	4	0.23019	0.5115	1	8471	1	3.0467	0.014182	0.081887	1	1106	3	3.0467
Sec14l2	4	0.98027	0.95392	1	19063	0	3.3482	0.014188	0.081887	1	1107	4	3.3482
Actl11	4	0.10599	0.35521	1	5178	1	3.0614	0.01421	0.081887	1	1108	3	3.0614
Uvssa	4	0.98579	0.9644	1	19201	0	2.8686	0.014213	0.081887	1	1109	4	2.8686
Ubn2	4	0.96828	0.92899	1	18774	0	3.4667	0.014234	0.081887	1	1110	3	3.4667
Vmn1r75	4	0.89824	0.86606	1	17603	1	4.0565	0.014237	0.081887	1	1111	3	4.0565
Shcbp1l	4	0.96912	0.93064	1	18789	0	3.271	0.014243	0.081887	1	1112	3	3.271
Cyp2c54	4	0.98575	0.9644	1	19200	0	2.4018	0.014246	0.081887	1	1113	4	2.4018
Klk1b11	4	0.61096	0.74502	1	14595	1	2.8813	0.014257	0.081887	1	1114	3	2.8813
Spp1	4	0.73295	0.79956	1	15984	1	3.0584	0.014266	0.081887	1	1115	3	3.0584
A4galt	4	0.051256	0.24791	1	3213	1	3.6268	0.014276	0.081887	1	1116	3	3.6268
Dusp14	3	0.9857	0.96846	1	19199	0	2.7961	0.014301	0.059313	1	1117	3	2.7961
Svs4	4	0.3829	0.61847	1	11461	1	2.9077	0.014319	0.081887	1	1118	3	2.9077
Taf7l	4	0.38962	0.6191	1	11556	1	4.2035	0.014321	0.081887	1	1119	3	4.2035
Muc20	4	0.98567	0.9644	1	19198	0	1.7001	0.014328	0.081887	1	1120	4	1.7001
Gm9112	4	0.98565	0.96409	1	19197	0	2.1016	0.014351	0.082423	1	1121	4	2.1016
Arl5a	4	0.98565	0.96409	1	19196	0	1.889	0.014353	0.082423	1	1122	4	1.889
Emc8	4	0.97845	0.95058	1	19025	0	1.7253	0.01436	0.082699	1	1123	4	1.7253
Kcns1	4	0.88936	0.8615	1	17484	1	3.2753	0.014377	0.082699	1	1124	3	3.2753
Naaa	4	0.21259	0.4932	1	8026	1	3.4673	0.01438	0.082699	1	1125	3	3.4673
Mettl5	4	0.65837	0.76821	1	15266	2	-0.16809	0.01441	0.082699	1	1126	2	-0.16809
Acot11	4	0.98558	0.96376	1	19194	0	1.367	0.014419	0.082699	1	1127	4	1.367
Suv39h1	4	0.98558	0.96376	1	19193	0	2.8116	0.014425	0.082699	1	1128	4	2.8116
Etfa	4	0.23804	0.51259	1	8676	1	3.7348	0.014445	0.082699	1	1129	3	3.7348
Dcun1d1	4	0.80758	0.8259	1	16578	1	1.5549	0.014461	0.08298	1	1130	2	1.5549
Racgap1	3	0.88181	0.81374	1	17394	0	-1.4943	0.014488	0.05958	1	1131	2	-1.4943
Ybx3	4	0.9855	0.96343	1	19192	0	2.7729	0.014497	0.08298	1	1132	4	2.7729
D16Ertd472e	4	0.36186	0.60988	1	11175	1	3.6689	0.0145	0.08298	1	1133	3	3.6689
Nfrkb	4	0.9855	0.96343	1	19191	0	3.2781	0.014501	0.08298	1	1134	4	3.2781
Slc5a8	4	0.86513	0.8484	1	17187	1	2.9367	0.014501	0.08298	1	1135	3	2.9367
Mtap	4	0.76044	0.80581	1	16197	1	1.8138	0.014511	0.08298	1	1136	2	1.8138
Etohi1	4	0.41639	0.64507	1	11950	1	3.7869	0.014524	0.082981	1	1137	3	3.7869
Kif2b	4	0.98547	0.96343	1	19190	0	1.4667	0.014529	0.082981	1	1138	4	1.4667
Cd300a	4	0.15843	0.43146	1	6631	1	3.3247	0.014534	0.082981	1	1139	3	3.3247
Il17f	4	0.68192	0.77921	1	15599	2	-0.26805	0.014561	0.082981	1	1140	2	-0.26805
Gm13272	4	0.56792	0.72775	1	14024	1	3.6724	0.014577	0.082981	1	1141	3	3.6724
Slc25a14	4	0.98542	0.96343	1	19189	0	1.9206	0.014578	0.083406	1	1142	4	1.9206
Chst13	4	0.98541	0.96343	1	19187	0	1.4287	0.014595	0.083406	1	1143	4	1.4287
Oxnad1	4	0.46138	0.66372	1	12555	2	-3.1028	0.014611	0.083406	1	1144	1	-3.1028
Nrg4	4	0.98538	0.96343	1	19185	0	2.1451	0.014618	0.083406	1	1145	4	2.1451
Fignl2	4	0.011194	0.10187	1	837	2	-0.95087	0.01464	0.083406	1	1146	2	-0.95087
Myh11	4	0.60431	0.74092	1	14500	1	3.1454	0.014653	0.083406	1	1147	3	3.1454
Fut8	4	0.97973	0.95349	1	19052	0	3.8865	0.014661	0.083695	1	1148	4	3.8865
Gm4305	4	0.27101	0.54223	1	9504	3	-5.0948	0.014661	0.083695	1	1149	1	-5.0948
Cdkn1a	4	0.9853	0.96343	1	19184	0	2.1988	0.014695	0.083695	1	1150	4	2.1988
Pdgfd	4	0.2691	0.5419	1	9466	2	-1.5477	0.014712	0.083695	1	1151	2	-1.5477
Atp2c2	4	0.48919	0.68254	1	12941	1	3.5365	0.014724	0.083695	1	1152	3	3.5365
Tmem206	4	0.98524	0.96343	1	19183	0	3.0359	0.014757	0.083695	1	1153	4	3.0359
2011-09-01	4	0.92247	0.87993	1	17944	1	2.8701	0.014782	0.084099	1	1154	3	2.8701
Kcnk13	4	0.26136	0.53172	1	9262	1	1.0232	0.014812	0.084099	1	1155	3	1.0232
Olfr1121	4	0.51888	0.69682	1	13375	1	3.7771	0.014844	0.0841	1	1156	3	3.7771
Dffa	4	0.98032	0.95392	1	19065	0	2.0674	0.014912	0.084671	1	1157	4	2.0674
Zfp61	4	0.87529	0.85382	1	17304	1	3.3382	0.014926	0.084671	1	1158	3	3.3382
Sgcd	4	0.98505	0.96275	1	19182	0	2.0312	0.014949	0.084672	1	1159	4	2.0312
Olfr201	4	0.14221	0.40816	1	6202	1	1.6284	0.014962	0.084672	1	1160	2	1.6284
Gsx1	4	0.10216	0.34811	1	5068	1	3.3521	0.015013	0.084936	1	1161	3	3.3521
2310014L17Rik	4	0.98495	0.96275	1	19181	0	2.0442	0.015047	0.084937	1	1162	4	2.0442
Vmn1r210	4	0.98492	0.96242	1	19180	0	2.9503	0.015078	0.085201	1	1163	4	2.9503
Tmem68	4	0.70611	0.79266	1	15815	1	3.4186	0.015101	0.085202	1	1164	3	3.4186
Actl6b	4	0.96971	0.93225	1	18802	0	2.7585	0.015111	0.085202	1	1165	3	2.7585
Gm20822	4	0.65759	0.76821	1	15256	1	3.2329	0.015114	0.085202	1	1166	3	3.2329
Ccnt1	4	0.98488	0.96242	1	19179	0	2.5838	0.015122	0.085202	1	1167	4	2.5838
Ypel3	4	0.2725	0.54289	1	9554	1	1.6918	0.015163	0.085913	1	1168	2	1.6918
Olfr488	4	0.66216	0.77042	1	15310	1	0.70426	0.015163	0.085913	1	1169	2	0.70426
Omg	4	0.98482	0.96242	1	19178	0	1.8021	0.015179	0.085914	1	1170	4	1.8021
Pou3f2	4	0.053133	0.25247	1	3320	2	-1.0386	0.01522	0.086184	1	1171	2	-1.0386
Ripk3	4	0.91978	0.87758	1	17908	1	3.0472	0.015226	0.086184	1	1172	3	3.0472
Sstr4	4	0.4143	0.64507	1	11913	1	3.1471	0.015249	0.086184	1	1173	3	3.1471
Olfr633	4	0.51681	0.69579	1	13350	1	2.1989	0.015263	0.086184	1	1174	3	2.1989
Rab8a	4	0.98472	0.96242	1	19177	0	3.1381	0.015275	0.086184	1	1175	4	3.1381
Sned1	4	0.98471	0.96242	1	19176	0	1.4646	0.015289	0.086184	1	1176	4	1.4646
H2-Ob	4	0.9847	0.96242	1	19175	0	2.8623	0.015295	0.086184	1	1177	4	2.8623
Tceal7	4	0.9847	0.96242	1	19174	0	3.2975	0.015304	0.086184	1	1178	4	3.2975
Ttc7	4	0.34618	0.5979	1	10959	1	3.4659	0.01531	0.086184	1	1179	3	3.4659
Dcun1d5	3	0.62239	0.68958	1	14762	1	4.8162	0.015316	0.062201	1	1180	2	4.8162
Pelp1	4	0.64392	0.76334	1	15082	2	-3.807	0.015364	0.086451	1	1181	1	-3.807
Psmb8	4	0.98462	0.9621	1	19173	0	3.1164	0.015381	0.086452	1	1182	4	3.1164
St6galnac6	4	0.72237	0.79807	1	15915	1	3.2157	0.015382	0.086452	1	1183	3	3.2157
Gm21379	4	0.9846	0.9621	1	19172	0	2.2851	0.015404	0.087592	1	1184	4	2.2851
Fgl2	4	0.73892	0.80035	1	16024	1	0.43822	0.015414	0.087887	1	1185	2	0.43822
Tmem151b	4	0.98454	0.96174	1	19170	0	2.6731	0.015464	0.087887	1	1186	4	2.6731
Stx19	4	0.51219	0.69231	1	13284	2	-0.39973	0.015464	0.087887	1	1187	2	-0.39973
Sms	4	0.75724	0.80581	1	16169	1	3.0866	0.015502	0.087887	1	1188	3	3.0866
Dusp1	4	0.98449	0.96174	1	19169	0	2.0307	0.015506	0.087888	1	1189	4	2.0307
G3bp2	4	0.98449	0.96174	1	19168	0	2.0759	0.01551	0.087888	1	1190	4	2.0759
Ctse	4	0.75224	0.80269	1	16121	1	2.8305	0.015522	0.087888	1	1191	3	2.8305
Slitrk6	4	0.10468	0.35261	1	5137	1	3.6624	0.015543	0.087888	1	1192	3	3.6624
Kcne3	4	0.41009	0.64335	1	11859	1	2.861	0.015543	0.087888	1	1193	3	2.861
Tagap1	3	0.9319	0.87967	1	18094	0	0.24426	0.015543	0.062853	1	1194	2	0.24426
A530016L24Rik	4	0.98446	0.96174	1	19167	0	2.0831	0.015544	0.087888	1	1195	4	2.0831
Ankle1	4	0.98445	0.96174	1	19166	0	1.9383	0.015551	0.087888	1	1196	4	1.9383
Snai1	4	0.98444	0.96174	1	19165	0	1.8688	0.015564	0.087888	1	1197	4	1.8688
Spag16	4	0.87829	0.85614	1	17339	1	3.5818	0.015579	0.087888	1	1198	3	3.5818
Pax5	4	0.043868	0.23206	1	2789	1	3.6695	0.015586	0.087888	1	1199	3	3.6695
Setdb2	4	0.9844	0.96139	1	19164	0	3.1142	0.015604	0.088185	1	1200	4	3.1142
Safb2	4	0.98439	0.96139	1	19163	0	1.8185	0.015607	0.088185	1	1201	4	1.8185
Iigp1	4	0.80559	0.82509	1	16560	1	1.5317	0.015615	0.088185	1	1202	2	1.5317
Bmper	4	0.87999	0.85728	1	17368	1	2.8629	0.015622	0.088185	1	1203	3	2.8629
Aaed1	4	0.98436	0.96139	1	19162	0	2.1999	0.015642	0.088185	1	1204	4	2.1999
Olfr701	4	0.7465	0.80189	1	16076	1	1.0422	0.015665	0.088185	1	1205	2	1.0422
Wdr13	4	0.98431	0.96139	1	19161	0	2.5325	0.015694	0.088185	1	1206	4	2.5325
Zfp397	4	0.41843	0.64507	1	11985	1	2.9729	0.015698	0.088185	1	1207	3	2.9729
Arpc1a	4	0.38736	0.6191	1	11524	1	2.4546	0.015715	0.088186	1	1208	3	2.4546
Pfkfb3	4	0.60064	0.73977	1	14454	2	0.2347	0.015724	0.088186	1	1209	2	0.2347
Gltp	4	0.15758	0.43146	1	6611	2	-1.0431	0.015731	0.088186	1	1210	2	-1.0431
Olfr834	4	0.98426	0.96139	1	19160	0	1.59	0.015741	0.088186	1	1211	4	1.59
Mrgprb5	4	0.98425	0.96139	1	19159	0	1.73	0.01575	0.088186	1	1212	4	1.73
Trpm5	4	0.64446	0.76334	1	15089	1	2.8621	0.015753	0.088186	1	1213	3	2.8621
Lsm1	4	0.79669	0.82274	1	16477	1	2.0357	0.015765	0.088186	1	1214	3	2.0357
Prss53	4	0.6389	0.76215	1	14996	1	3.3356	0.015796	0.088186	1	1215	3	3.3356
Serpind1	4	0.97752	0.94928	1	18995	0	2.3489	0.015815	0.088469	1	1216	4	2.3489
Serpinb9c	4	0.95347	0.89956	1	18505	0	2.3289	0.015847	0.088469	1	1217	2	2.3289
Tnnc2	4	0.98413	0.96139	1	19157	0	2.173	0.015873	0.088469	1	1218	4	2.173
Vmn1r143	3	0.8012	0.76737	1	16522	1	4.6261	0.015921	0.063255	1	1219	2	4.6261
Mlc1	4	0.38398	0.61847	1	11473	1	2.9754	0.015927	0.088469	1	1220	3	2.9754
Defb9	4	0.62598	0.75417	1	14825	1	-1.0197	0.015966	0.089186	1	1221	2	-1.0197
Ms4a10	4	0.33901	0.59419	1	10874	2	-1.8198	0.016016	0.089477	1	1222	2	-1.8198
Moxd1	4	0.98398	0.96106	1	19155	0	1.4573	0.016016	0.089477	1	1223	4	1.4573
Gm14548	4	0.97543	0.94666	1	18936	0	3.0558	0.016032	0.089477	1	1224	4	3.0558
Nckap1l	4	0.84823	0.84291	1	17000	1	3.9388	0.016095	0.089775	1	1225	3	3.9388
Rusc2	4	0.42914	0.64893	1	12117	1	2.988	0.01611	0.089775	1	1226	3	2.988
Artn	4	0.36708	0.61108	1	11245	1	3.1615	0.016123	0.089776	1	1227	3	3.1615
9130204L05Rik	4	0.89816	0.86606	1	17601	1	3.0487	0.01613	0.089776	1	1228	3	3.0487
Gpr149	4	0.91079	0.87221	1	17766	1	3.4858	0.016154	0.090264	1	1229	3	3.4858
Susd4	4	0.97096	0.93546	1	18826	0	1.6536	0.016166	0.090264	1	1230	3	1.6536
Dhx40	4	0.98383	0.9607	1	19154	0	2.3942	0.01617	0.090264	1	1231	4	2.3942
Ankrd23	4	0.56712	0.72682	1	14015	2	1.9766	0.016176	0.090264	1	1232	2	1.9766
Slc7a4	4	0.98379	0.9607	1	19152	0	2.9895	0.016207	0.090265	1	1233	4	2.9895
Sec14l3	4	0.86809	0.85306	1	17220	1	3.2232	0.016216	0.090265	1	1234	3	3.2232
Zkscan8	4	0.25996	0.53172	1	9224	2	-0.64026	0.016266	0.090573	1	1235	2	-0.64026
2810403A07Rik	4	0.94265	0.89509	1	18304	0	3.1695	0.016293	0.090573	1	1236	3	3.1695
Lyn	4	0.98371	0.96033	1	19151	0	1.623	0.016294	0.090573	1	1237	4	1.623
Peli2	4	0.038582	0.21814	1	2506	1	3.2527	0.016295	0.090573	1	1238	3	3.2527
Olfr1217	4	0.23133	0.5115	1	8504	2	-3.3994	0.016317	0.090867	1	1239	1	-3.3994
Tecta	4	0.13829	0.40114	1	6114	1	2.7458	0.016367	0.091181	1	1240	3	2.7458
Slc2a4	4	0.92439	0.8807	1	17975	1	3.7109	0.016382	0.091181	1	1241	3	3.7109
Olfr293	4	0.98361	0.95961	1	19150	0	2.1259	0.016394	0.091181	1	1242	4	2.1259
Insm2	4	0.33318	0.59177	1	10795	1	1.5457	0.016417	0.091482	1	1243	3	1.5457
Vmn2r89	4	0.95508	0.90171	1	18533	0	3.4513	0.016419	0.091482	1	1244	3	3.4513
Rdh13	4	0.98358	0.95926	1	19149	0	1.4113	0.01642	0.091482	1	1245	4	1.4113
Olfr1238	4	0.98357	0.95926	1	19148	0	2.1333	0.016429	0.091482	1	1246	4	2.1333
Arf5	4	0.47979	0.67558	1	12812	1	3.1625	0.016441	0.091483	1	1247	3	3.1625
Mast2	4	0.0036317	0.044192	1	305	2	-1.4554	0.016467	0.091755	1	1248	2	-1.4554
Tspan1	4	0.51864	0.69631	1	13373	1	2.9968	0.016469	0.091755	1	1249	3	2.9968
Fbxo41	4	0.11965	0.37757	1	5590	1	3.1457	0.016509	0.091755	1	1250	3	3.1457
Rnf19a	4	0.25304	0.52926	1	9064	2	-0.33976	0.016517	0.091755	1	1251	2	-0.33976
Lzts3	4	0.60249	0.74036	1	14478	1	3.7243	0.016537	0.091755	1	1252	3	3.7243
Mut	4	0.98346	0.95926	1	19147	0	1.866	0.016543	0.091755	1	1253	4	1.866
Trem1	4	0.67704	0.77864	1	15526	1	3.4247	0.016555	0.091755	1	1254	3	3.4247
Ctsg	4	0.98344	0.95926	1	19146	0	1.9273	0.016562	0.091755	1	1255	4	1.9273
Rap1gds1	4	0.38462	0.61847	1	11484	2	-1.1973	0.016567	0.091755	1	1256	2	-1.1973
Hlx	4	0.98341	0.95891	1	19145	0	2.2667	0.016586	0.09204	1	1257	4	2.2667
Asb3	4	0.98339	0.95891	1	19144	0	2.1423	0.016609	0.09204	1	1258	4	2.1423
Lefty2	4	0.15268	0.42394	1	6480	1	2.6743	0.016616	0.09204	1	1259	3	2.6743
Rps6ka2	4	0.055906	0.25978	1	3455	2	-1.2823	0.016617	0.09204	1	1260	2	-1.2823
Nhlrc4	4	0.98337	0.95891	1	19143	0	1.509	0.016633	0.09204	1	1261	4	1.509
Akr1b7	4	0.98334	0.95891	1	19142	0	1.5954	0.016663	0.092041	1	1262	4	1.5954
S100a16	4	0.57378	0.72833	1	14111	1	1.4571	0.016667	0.092041	1	1263	3	1.4571
3110079O15Rik	4	0.98333	0.95891	1	19141	0	3.4185	0.016673	0.092041	1	1264	4	3.4185
Lrig1	4	0.98329	0.95891	1	19140	0	2.7262	0.016708	0.092041	1	1265	4	2.7262
Smc1b	4	0.37023	0.61297	1	11294	2	-2.6429	0.016718	0.092318	1	1266	2	-2.6429
Hsf4	4	0.66183	0.77042	1	15305	1	2.8941	0.016738	0.092318	1	1267	3	2.8941
Vmn1r74	4	0.5712	0.72775	1	14076	1	0.89991	0.016768	0.092318	1	1268	3	0.89991
Crtc2	4	0.98321	0.95891	1	19139	0	2.0787	0.016788	0.092318	1	1269	4	2.0787
Lrfn4	4	0.69753	0.79038	1	15757	1	3.0572	0.016799	0.092318	1	1270	3	3.0572
Cbr4	4	0.51463	0.69292	1	13316	2	-1.2175	0.016818	0.092596	1	1271	2	-1.2175
Ctag2	4	0.17265	0.44657	1	7002	2	-0.66818	0.016835	0.092596	1	1272	2	-0.66818
Pcdha6	4	0.97904	0.95182	1	19032	0	3.7901	0.016865	0.092596	1	1273	4	3.7901
Csrp1	4	0.52603	0.70157	1	13453	2	0.98252	0.016868	0.092596	1	1274	2	0.98252
Atg101	4	0.44655	0.65739	1	12366	2	-0.096553	0.01688	0.092597	1	1275	2	-0.096553
Tjp2	4	0.98311	0.95891	1	19137	0	2.1669	0.016886	0.092597	1	1276	4	2.1669
Tubb1	4	0.76035	0.80581	1	16194	1	3.2238	0.016895	0.092597	1	1277	3	3.2238
Kdm8	4	0.13151	0.39439	1	5927	2	-1.8598	0.016918	0.092597	1	1278	2	-1.8598
Rhebl1	4	0.93713	0.89057	1	18194	1	3.7561	0.016962	0.09305	1	1279	3	3.7561
Sphk1	4	0.34824	0.59908	1	10986	1	-0.87314	0.016968	0.09305	1	1280	2	-0.87314
Ugt2b36	4	0.77994	0.81581	1	16344	1	2.7656	0.016976	0.09305	1	1281	3	2.7656
Acss2	4	0.8879	0.86111	1	17467	1	3.7653	0.017023	0.09305	1	1282	3	3.7653
Gigyf1	4	0.36649	0.61108	1	11238	2	-0.62084	0.01706	0.093351	1	1283	2	-0.62084
Dmrta2	4	0.15125	0.42252	1	6433	2	-1.2585	0.017068	0.093351	1	1284	2	-1.2585
Kitl	3	0.62407	0.68958	1	14793	1	3.7653	0.017077	0.068114	1	1285	2	3.7653
Slc41a3	4	0.98292	0.95854	1	19136	0	1.787	0.017081	0.093352	1	1286	4	1.787
1700019G17Rik	4	0.2981	0.57102	1	10194	3	-4.4271	0.017118	0.093648	1	1287	1	-4.4271
Wdr6	4	0.67834	0.77864	1	15546	1	3.1965	0.01712	0.093648	1	1288	3	3.1965
Pcdhb21	3	0.98285	0.96433	1	19134	0	2.7797	0.017149	0.068115	1	1289	3	2.7797
Ripply2	4	0.18782	0.46346	1	7404	2	2.0412	0.017165	0.093648	1	1290	2	2.0412
Arhgap25	4	0.98283	0.95819	1	19133	0	2.3756	0.017165	0.093648	1	1291	4	2.3756
Mcoln1	4	0.3129	0.58117	1	10547	2	0.23407	0.017168	0.093648	1	1292	2	0.23407
Olfr846	4	0.98282	0.95819	1	19132	0	2.764	0.01718	0.093934	1	1293	4	2.764
Olfr491	4	0.98274	0.95819	1	19129	0	3.1052	0.01721	0.093934	1	1294	4	3.1052
Slc16a4	4	0.57408	0.72833	1	14117	2	-0.1279	0.017219	0.093934	1	1295	2	-0.1279
Arhgef39	4	0.98278	0.95819	1	19131	0	1.9385	0.017223	0.093934	1	1296	4	1.9385
Mpeg1	4	0.87673	0.8554	1	17322	1	3.1925	0.017228	0.093934	1	1297	3	3.1925
Gm2a	4	0.98274	0.95819	1	19130	0	2.2158	0.017257	0.093934	1	1298	4	2.2158
Plxna2	4	0.0020905	0.027334	1	171	2	-1.5222	0.017269	0.093934	1	1299	2	-1.5222
Notch1	4	0.98272	0.95819	1	19128	0	1.837	0.017284	0.093934	1	1300	4	1.837
Amelx	4	0.9827	0.95819	1	19127	0	1.5229	0.017301	0.093934	1	1301	4	1.5229
Hivep1	4	0.58741	0.7338	1	14284	1	2.5312	0.017309	0.093934	1	1302	2	2.5312
Timm17b	4	0.94118	0.89285	1	18275	0	2.8797	0.017312	0.093934	1	1303	3	2.8797
Atl3	4	0.59434	0.73617	1	14376	2	-2.1085	0.017319	0.093934	1	1304	2	-2.1085
Krtap31-2	4	0.98265	0.95819	1	19126	0	2.5032	0.017351	0.093934	1	1305	4	2.5032
2310057N15Rik	4	0.69161	0.78656	1	15721	1	0.85048	0.017369	0.093934	1	1306	2	0.85048
Rbbp8nl	4	0.98262	0.95818	1	19124	0	1.1306	0.017383	0.093934	1	1307	4	1.1306
Lrp12	4	0.42809	0.64893	1	12098	1	3.5691	0.017397	0.093934	1	1308	3	3.5691
Npc2	4	0.82622	0.82895	1	16787	1	2.9652	0.017408	0.093935	1	1309	3	2.9652
Chrna10	4	0.13748	0.39858	1	6095	1	3.3322	0.017412	0.093935	1	1310	3	3.3322
Hyal2	4	0.025058	0.1694	1	1681	2	0.10007	0.017419	0.093935	1	1311	2	0.10007
Erich6	4	0.52699	0.70157	1	13461	1	3.7033	0.01743	0.093935	1	1312	3	3.7033
Rnase10	4	0.98253	0.95818	1	19123	0	1.8261	0.017468	0.093935	1	1313	4	1.8261
Olfr937	4	0.044236	0.23206	1	2810	3	-5.5361	0.017469	0.093935	1	1314	1	-5.5361
Olfr549	4	0.88671	0.86072	1	17455	1	2.8859	0.0175	0.093935	1	1315	3	2.8859
Gfra1	4	0.58504	0.7329	1	14253	2	1.1512	0.017506	0.093935	1	1316	2	1.1512
Sergef	4	0.98246	0.95818	1	19122	0	1.1209	0.017541	0.093935	1	1317	4	1.1209
Xkr8	4	0.15459	0.42802	1	6541	2	0.57862	0.017575	0.093935	1	1318	2	0.57862
Mmp19	4	0.98241	0.95818	1	19121	0	2.1291	0.017586	0.093935	1	1319	4	2.1291
1700021F07Rik	4	0.85475	0.84448	1	17064	1	3.5297	0.017619	0.093935	1	1320	3	3.5297
Elf5	4	0.40562	0.63828	1	11782	1	1.2595	0.017619	0.093935	1	1321	2	1.2595
Mapk8ip2	3	0.98236	0.96302	1	19120	0	1.9071	0.017639	0.072358	1	1322	3	1.9071
Xylb	4	0.96259	0.91329	1	18662	0	2.8375	0.017667	0.09426	1	1323	3	2.8375
Sgk3	4	0.084306	0.31343	1	4518	2	-1.1585	0.017669	0.09426	1	1324	2	-1.1585
E030002O03Rik	4	0.98232	0.95779	1	19119	0	2.3017	0.017676	0.09426	1	1325	4	2.3017
Cdc42se1	4	0.98231	0.95779	1	19118	0	3.3223	0.017694	0.09426	1	1326	4	3.3223
Gm8653	4	0.69044	0.78578	1	15711	1	3.277	0.017697	0.09426	1	1327	3	3.277
Fzd5	4	0.52947	0.70252	1	13494	1	2.8722	0.017705	0.09426	1	1328	3	2.8722
Sssca1	4	0.96427	0.91769	1	18693	0	3.0054	0.017708	0.09426	1	1329	3	3.0054
Cfap74	4	0.97909	0.95182	1	19034	0	1.4024	0.017719	0.094576	1	1330	4	1.4024
Trim39	4	0.98228	0.95741	1	19117	0	1.4013	0.017723	0.094576	1	1331	4	1.4013
Ctsc	4	0.81971	0.82742	1	16724	1	3.1694	0.017749	0.094855	1	1332	3	3.1694
Sost	4	0.97923	0.95182	1	19038	0	3.4766	0.017753	0.094855	1	1333	4	3.4766
2610301B20Rik	4	0.1459	0.41894	1	6301	2	-2.508	0.017769	0.094855	1	1334	2	-2.508
Rbpms2	4	0.98223	0.95741	1	19116	0	2.2747	0.017771	0.094855	1	1335	4	2.2747
Purb	4	0.98059	0.95392	1	19074	0	3.2276	0.01782	0.094855	1	1336	4	3.2276
Vmn1r11	4	0.98217	0.95741	1	19115	0	1.6548	0.017832	0.094856	1	1337	4	1.6548
Dram1	4	0.98214	0.95741	1	19114	0	1.983	0.017859	0.094856	1	1338	4	1.983
Tmem139	4	0.76332	0.80655	1	16227	1	1.8371	0.01787	0.094856	1	1339	3	1.8371
Fam78a	4	0.23468	0.5115	1	8587	1	2.9967	0.017876	0.094856	1	1340	3	2.9967
Vmn1r115	4	0.26795	0.53988	1	9437	1	3.5644	0.017881	0.094856	1	1341	3	3.5644
Foxc1	4	0.98212	0.95741	1	19113	0	2.4757	0.017881	0.094856	1	1342	4	2.4757
Pcdhb22	4	0.98209	0.95704	1	19112	0	1.9218	0.017911	0.095161	1	1343	4	1.9218
Slc39a11	4	0.085079	0.31417	1	4539	2	-2.1563	0.01792	0.095161	1	1344	2	-2.1563
Wbscr28	4	0.98208	0.95704	1	19111	0	2.2557	0.017924	0.095161	1	1345	4	2.2557
Ctsf	4	0.98207	0.95704	1	19110	0	2.7199	0.017927	0.095161	1	1346	4	2.7199
Zfp131	4	0.93437	0.88829	1	18143	1	0.36108	0.017935	0.095161	1	1347	2	0.36108
Gnat2	4	0.092949	0.33351	1	4797	2	-1.2245	0.017973	0.095161	1	1348	2	-1.2245
Guca1a	4	0.18556	0.46048	1	7352	2	-0.88686	0.017996	0.095162	1	1349	2	-0.88686
Rasa4	4	0.61602	0.75034	1	14670	2	-0.47244	0.01802	0.095162	1	1350	1	-0.47244
Dach2	4	0.73531	0.79956	1	16001	1	3.058	0.018057	0.095162	1	1351	3	3.058
Nphp4	4	0.86903	0.85306	1	17230	1	2.0146	0.01807	0.095162	1	1352	3	2.0146
Olfr282	4	0.98186	0.95704	1	19109	0	2.4449	0.018143	0.095463	1	1353	4	2.4449
Tbr1	4	0.11769	0.37162	1	5527	1	1.956	0.01817	0.095463	1	1354	3	1.956
Cyth2	4	0.1177	0.37162	1	5528	2	-0.14317	0.018174	0.095463	1	1355	2	-0.14317
Tas2r144	4	0.92638	0.88145	1	18006	1	3.1989	0.018189	0.095463	1	1356	3	3.1989
Nppc	4	0.98181	0.95704	1	19107	0	1.7633	0.018194	0.095463	1	1357	4	1.7633
Slc14a2	4	0.9818	0.95704	1	19106	0	2.2275	0.018199	0.095463	1	1358	4	2.2275
Akr7a5	4	0.44108	0.65457	1	12275	2	-1.5299	0.01822	0.095463	1	1359	2	-1.5299
Evi2a	4	0.93424	0.88829	1	18140	1	3.439	0.018244	0.095759	1	1360	3	3.439
Tmem69	4	0.71407	0.79615	1	15866	1	3.5794	0.018252	0.095759	1	1361	3	3.5794
Cd59b	4	0.4174	0.64507	1	11965	1	2.7236	0.018265	0.095759	1	1362	3	2.7236
Ccdc91	4	0.91793	0.87454	1	17880	1	2.6682	0.01827	0.09576	1	1363	3	2.6682
Ngfr	4	0.98172	0.95704	1	19105	0	2.65	0.018282	0.09576	1	1364	4	2.65
Kcp	4	0.98171	0.95704	1	19104	0	2.4081	0.018294	0.09576	1	1365	4	2.4081
Kcnb2	4	0.16386	0.43866	1	6780	3	-3.4968	0.01832	0.096043	1	1366	1	-3.4968
Upf3b	4	0.98168	0.95704	1	19103	0	1.5223	0.018322	0.096043	1	1367	4	1.5223
Ttc9b	4	0.98166	0.95704	1	19102	0	1.1307	0.018337	0.096043	1	1368	4	1.1307
2310050C09Rik	4	0.98166	0.95704	1	19101	0	1.6419	0.018342	0.096043	1	1369	4	1.6419
Galnt16	4	0.98165	0.95704	1	19100	0	2.3934	0.01835	0.096043	1	1370	4	2.3934
Slc1a2	4	0.98165	0.95704	1	19099	0	1.9667	0.018353	0.096043	1	1371	4	1.9667
Tectb	4	0.36852	0.6117	1	11271	2	-1.3318	0.01837	0.096043	1	1372	2	-1.3318
Eif3b	4	0.64066	0.76334	1	15028	1	0.58083	0.018376	0.096043	1	1373	2	0.58083
C530008M17Rik	4	0.97637	0.94754	1	18968	0	3.482	0.018414	0.096348	1	1374	4	3.482
Gm15107	4	0.83474	0.83358	1	16867	1	3.1789	0.01842	0.096348	1	1375	3	3.1789
4921517D22Rik	4	0.88348	0.85802	1	17415	1	3.2264	0.018421	0.096348	1	1376	3	3.2264
Etv4	4	0.25065	0.5248	1	8995	2	1.5379	0.01847	0.097102	1	1377	2	1.5379
Epc1	4	0.29412	0.5687	1	10084	1	2.9253	0.018485	0.097102	1	1378	3	2.9253
Efcab10	4	0.089213	0.32524	1	4681	1	3.0232	0.018501	0.097102	1	1379	3	3.0232
Phyhipl	4	0.98147	0.95666	1	19097	0	1.2531	0.018525	0.097102	1	1380	4	1.2531
Frmd8	4	0.98146	0.95666	1	19096	0	0.8963	0.018541	0.097103	1	1381	4	0.8963
Dpys	4	0.96911	0.93064	1	18788	0	2.6054	0.018547	0.097103	1	1382	3	2.6054
Depdc7	4	0.98144	0.95666	1	19095	0	1.4492	0.01856	0.097103	1	1383	4	1.4492
Rxfp3	4	0.98143	0.95666	1	19094	0	1.4242	0.018569	0.097103	1	1384	4	1.4242
Dleu7	4	0.16656	0.43977	1	6847	1	-1.558	0.01857	0.097103	1	1385	2	-1.558
Stk33	4	0.97938	0.95182	1	19043	0	3.3859	0.018571	0.097103	1	1386	4	3.3859
Olfr355	4	0.98141	0.95666	1	19093	0	2.111	0.018589	0.097103	1	1387	4	2.111
Sh3rf2	4	0.72443	0.79807	1	15928	1	3.2522	0.018602	0.097103	1	1388	3	3.2522
Uhmk1	4	0.98139	0.95666	1	19092	0	1.4694	0.018609	0.097103	1	1389	4	1.4694
Mdh1	4	0.97339	0.94245	1	18885	0	3.1471	0.018636	0.097415	1	1390	3	3.1471
1810011H11Rik	4	0.27673	0.54588	1	9662	2	-0.58819	0.01867	0.09772	1	1391	2	-0.58819
1700123O20Rik	4	0.38589	0.61847	1	11507	2	-0.75553	0.018704	0.098041	1	1392	2	-0.75553
Cttnbp2nl	4	0.83592	0.83358	1	16883	1	3.3075	0.018705	0.098041	1	1393	3	3.3075
Naa25	4	0.13977	0.4036	1	6145	3	-5.8064	0.01872	0.098041	1	1394	1	-5.8064
Gjd2	4	0.52082	0.69904	1	13398	1	2.844	0.018729	0.098338	1	1395	3	2.844
Gm12695	4	0.081715	0.30582	1	4440	1	3.3543	0.01874	0.098338	1	1396	3	3.3543
Trim72	4	0.98125	0.95551	1	19090	0	1.1265	0.018745	0.098338	1	1397	4	1.1265
Vmn2r76	4	0.98124	0.95551	1	19089	0	1.5952	0.018758	0.098339	1	1398	4	1.5952
Unk	4	0.75277	0.80269	1	16125	1	-0.33126	0.01877	0.098339	1	1399	1	-0.33126
Nell1	4	0.061653	0.26729	1	3772	1	3.1593	0.01879	0.098671	1	1400	3	3.1593
Crhr1	4	0.9812	0.9551	1	19087	0	1.7759	0.018796	0.099126	1	1401	4	1.7759
Edc3	4	0.050994	0.24776	1	3203	3	-6.4471	0.018821	0.099126	1	1402	1	-6.4471
AI429214	4	0.73165	0.79956	1	15971	1	3.1373	0.018822	0.099126	1	1403	3	3.1373
Cx3cr1	4	0.27114	0.54223	1	9512	2	-2.565	0.018871	0.099127	1	1404	2	-2.565
Dner	4	0.15512	0.42802	1	6551	2	1.261	0.018921	0.099425	1	1405	2	1.261
Lair1	4	0.64599	0.76334	1	15110	1	3.5004	0.018965	0.099426	1	1406	3	3.5004
Mgll	4	0.28416	0.55892	1	9846	2	0.14539	0.018971	0.099426	1	1407	2	0.14539
Pcdhga11	4	0.848	0.84291	1	16994	1	3.2541	0.018987	0.099426	1	1408	3	3.2541
Axin1	4	0.45101	0.66017	1	12430	1	3.5449	0.018992	0.099426	1	1409	3	3.5449
Sorl1	4	0.981	0.9551	1	19085	0	2.4453	0.018999	0.099426	1	1410	4	2.4453
Zfp438	4	0.86413	0.8484	1	17174	1	3.0751	0.019012	0.099426	1	1411	3	3.0751
Zfp185	4	0.35303	0.60212	1	11056	1	3.8574	0.019016	0.099426	1	1412	3	3.8574
Olfr926	4	0.43356	0.65006	1	12171	1	3.0117	0.019019	0.099875	1	1413	3	3.0117
Ccdc38	4	0.60146	0.74036	1	14461	2	-0.59395	0.019021	0.099875	1	1414	1	-0.59395
Hbq1a	4	0.078115	0.30238	1	4328	1	3.1237	0.019062	0.1002	1	1415	3	3.1237
Slc1a3	4	0.98093	0.95471	1	19084	0	2.1161	0.019069	0.1002	1	1416	4	2.1161
Ppid	4	0.064915	0.27233	1	3894	3	-6.1518	0.019071	0.1002	1	1417	1	-6.1518
Psmb9	4	0.98092	0.95471	1	19083	0	2.6192	0.019082	0.1002	1	1418	4	2.6192
Btla	4	0.27206	0.54289	1	9544	2	-0.98916	0.01909	0.1002	1	1419	2	-0.98916
Olfr116	4	0.48552	0.68093	1	12892	1	2.7853	0.019117	0.1002	1	1420	3	2.7853
Eaf2	4	0.5107	0.69231	1	13255	2	-1.2831	0.019121	0.1002	1	1421	1	-1.2831
Zfp239	3	0.98087	0.95986	1	19082	0	3.1476	0.019132	0.079955	1	1422	3	3.1476
Spata45	4	0.9461	0.89584	1	18364	0	3.5156	0.01917	0.10048	1	1423	3	3.5156
Mrc1	4	0.96025	0.91066	1	18615	0	2.5627	0.019171	0.10048	1	1424	3	2.5627
Olfr1015	4	0.96764	0.92498	1	18757	0	3.1901	0.019184	0.10048	1	1425	3	3.1901
Pigv	4	0.46248	0.66372	1	12571	2	0.95262	0.019233	0.10078	1	1426	2	0.95262
Tmem101	4	0.98075	0.95431	1	19080	0	2.7156	0.019249	0.10111	1	1427	4	2.7156
B3galnt2	4	0.98072	0.95431	1	19079	0	0.793	0.019278	0.10111	1	1428	4	0.793
Gab2	4	0.81486	0.82666	1	16664	1	4.2352	0.019297	0.10143	1	1429	3	4.2352
Tbl1x	4	0.4174	0.64507	1	11963	1	3.3975	0.019317	0.10143	1	1430	3	3.3975
Wdr20	4	0.98068	0.95431	1	19078	0	1.6582	0.019317	0.10143	1	1431	4	1.6582
Cln5	4	0.28942	0.56381	1	9974	1	-1.303	0.019321	0.10143	1	1432	2	-1.303
Slc39a13	4	0.98063	0.95392	1	19077	0	2.1933	0.019367	0.10219	1	1433	4	2.1933
Klc1	4	0.98063	0.95392	1	19076	0	1.8227	0.01937	0.10219	1	1434	4	1.8227
Ankrd28	4	0.93733	0.89057	1	18198	1	1.6816	0.019371	0.10219	1	1435	3	1.6816
Lurap1l	4	0.51192	0.69231	1	13277	1	3.2303	0.019372	0.10219	1	1436	3	3.2303
Krtap26-1	4	0.60745	0.7424	1	14547	1	2.5775	0.019376	0.10219	1	1437	3	2.5775
9130019O22Rik	4	0.41647	0.64507	1	11951	1	2.809	0.019404	0.10219	1	1438	3	2.809
Ranbp10	4	0.9806	0.95392	1	19075	0	2.8249	0.019404	0.10219	1	1439	4	2.8249
Msx3	4	0.51986	0.69806	1	13384	2	-2.2355	0.019421	0.10219	1	1440	2	-2.2355
Pdzk1ip1	4	0.15359	0.42596	1	6514	2	0.28841	0.019424	0.10219	1	1441	2	0.28841
Gm4302	4	0.19871	0.47553	1	7679	2	-0.81089	0.01944	0.10219	1	1442	2	-0.81089
Epx	4	0.98056	0.95392	1	19073	0	1.777	0.019441	0.10219	1	1443	4	1.777
Olfr986	4	0.46854	0.6679	1	12670	1	2.9202	0.019447	0.10219	1	1444	3	2.9202
Ppapdc1b	4	0.98055	0.95392	1	19072	0	1.6441	0.019455	0.10219	1	1445	4	1.6441
Chfr	4	0.60875	0.74327	1	14567	2	-2.4702	0.019471	0.10219	1	1446	1	-2.4702
Olfr58	4	0.98052	0.95392	1	19071	0	2.9961	0.019484	0.10219	1	1447	4	2.9961
Ncor2	4	0.98051	0.95392	1	19070	0	1.4652	0.01949	0.10219	1	1448	4	1.4652
Olfr693	4	0.98047	0.95392	1	19069	0	2.1488	0.019531	0.10219	1	1449	4	2.1488
Iws1	4	0.69658	0.78961	1	15751	1	2.9404	0.019568	0.10219	1	1450	3	2.9404
Lyzl6	4	0.41508	0.64507	1	11934	1	-0.26222	0.019571	0.10219	1	1451	1	-0.26222
Neurod1	4	0.95031	0.89813	1	18449	0	3.2877	0.019598	0.10219	1	1452	3	3.2877
Tanc1	4	0.9804	0.95392	1	19068	0	1.2666	0.0196	0.10219	1	1453	4	1.2666
Rfpl4b	4	0.9804	0.95392	1	19067	0	2.3843	0.019603	0.10219	1	1454	4	2.3843
Vmn1r94	4	0.98036	0.95392	1	19066	0	1.2184	0.019643	0.10294	1	1455	4	1.2184
Gpr45	4	0.0034607	0.043082	1	293	3	-7.1398	0.019671	0.10294	1	1456	1	-7.1398
Ifltd1	4	0.98031	0.95392	1	19064	0	1.2147	0.019694	0.10294	1	1457	4	1.2147
Gsto1	4	0.91968	0.87606	1	17906	1	1.8655	0.019704	0.10294	1	1458	2	1.8655
Pacs1	4	0.98024	0.95392	1	19062	0	1.1538	0.019763	0.10295	1	1459	4	1.1538
Gp9	4	0.98023	0.95392	1	19061	0	2.4398	0.019768	0.10295	1	1460	4	2.4398
Adgrv1	4	0.23331	0.5115	1	8551	2	-0.98267	0.019769	0.10295	1	1461	2	-0.98267
Daam1	4	0.81597	0.82666	1	16676	1	3.2703	0.019809	0.10342	1	1462	3	3.2703
Rfx1	4	0.50064	0.68677	1	13103	2	-0.35254	0.019821	0.10342	1	1463	2	-0.35254
Cldn1	4	0.98014	0.95392	1	19060	0	1.5386	0.019859	0.10389	1	1464	4	1.5386
Olfr1101	4	0.043254	0.22819	1	2759	1	1.8145	0.019871	0.10389	1	1465	3	1.8145
Nicn1	4	0.79494	0.82043	1	16456	1	2.9623	0.019893	0.10389	1	1466	3	2.9623
Slc4a1ap	4	0.028962	0.18879	1	1921	2	-1.2923	0.019914	0.10389	1	1467	2	-1.2923
2900092C05Rik	4	0.29335	0.56806	1	10063	2	-0.96352	0.019921	0.10389	1	1468	2	-0.96352
Gm9125	4	0.98008	0.95392	1	19059	0	1.4709	0.019921	0.10389	1	1469	4	1.4709
Glud1	4	0.98006	0.95392	1	19058	0	2.1146	0.019943	0.10389	1	1470	4	2.1146
Skor1	4	0.96581	0.92199	1	18716	0	3.2282	0.019965	0.10389	1	1471	3	3.2282
4930550C14Rik	4	0.44412	0.65709	1	12327	2	-1.9337	0.019971	0.10389	1	1472	2	-1.9337
Prf1	4	0.87089	0.85382	1	17250	1	2.8013	0.019989	0.10389	1	1473	3	2.8013
Usp17lc	4	0.6552	0.76705	1	15226	1	2.963	0.020003	0.10389	1	1474	3	2.963
1700024P16Rik	4	0.7455	0.80112	1	16063	1	2.9505	0.020011	0.10389	1	1475	3	2.9505
Ccdc83	4	0.72706	0.79882	1	15944	1	3.1603	0.020021	0.10389	1	1476	3	3.1603
Vsig10	4	0.97997	0.95392	1	19057	0	2.5918	0.020029	0.10389	1	1477	4	2.5918
Abhd13	4	0.95307	0.89886	1	18501	0	3.1102	0.02003	0.10389	1	1478	3	3.1102
Ms4a6c	4	0.45426	0.66074	1	12473	1	1.3585	0.020071	0.10389	1	1479	3	1.3585
Itgb2	4	0.97992	0.95392	1	19056	0	1.6588	0.020081	0.10389	1	1480	4	1.6588
Unkl	4	0.099296	0.34316	1	4976	1	3.3353	0.020102	0.10389	1	1481	3	3.3353
Tnfsfm13	4	0.10456	0.35261	1	5136	1	3.4021	0.020124	0.10424	1	1482	3	3.4021
Dcaf17	4	0.34618	0.5979	1	10957	1	1.3639	0.020171	0.10424	1	1483	3	1.3639
Ly6a	4	0.61182	0.74561	1	14608	1	1.9254	0.020181	0.10456	1	1484	2	1.9254
Olfr1112	4	0.97982	0.95349	1	19055	0	2.1554	0.020184	0.10456	1	1485	4	2.1554
Gm13276	4	0.16445	0.43939	1	6801	1	1.3936	0.020221	0.10456	1	1486	3	1.3936
Gnao1	4	0.12865	0.39154	1	5847	1	2.5471	0.020248	0.10501	1	1487	3	2.5471
Has2	3	0.97967	0.95653	1	19051	0	2.7611	0.020332	0.082853	1	1488	3	2.7611
Gm14151	4	0.97965	0.95309	1	19050	0	2.6134	0.02035	0.10564	1	1489	4	2.6134
Slc34a1	4	0.97964	0.95309	1	19049	0	0.90751	0.020355	0.10564	1	1490	4	0.90751
Zfp938	4	0.97962	0.95268	1	19048	0	0.90455	0.02038	0.10598	1	1491	4	0.90455
Pik3c2b	4	0.037029	0.21699	1	2416	2	-1.1852	0.020393	0.10598	1	1492	2	-1.1852
Ipp	4	0.9796	0.95268	1	19047	0	2.2023	0.020402	0.10598	1	1493	4	2.2023
Tsku	4	0.97959	0.95268	1	19046	0	2.4852	0.02041	0.10598	1	1494	4	2.4852
Hcn2	4	0.26649	0.53785	1	9398	3	-2.703	0.020421	0.10598	1	1495	1	-2.703
Lcn4	3	0.97278	0.94239	1	18868	0	2.0968	0.020432	0.083827	1	1496	3	2.0968
Pgbd1	4	0.28301	0.55659	1	9812	1	2.0776	0.020442	0.1063	1	1497	2	2.0776
Axl	4	0.10061	0.34706	1	5018	2	-0.46176	0.02047	0.10662	1	1498	2	-0.46176
Depdc5	4	0.23084	0.5115	1	8487	2	-0.51523	0.020491	0.10662	1	1499	2	-0.51523
Trim6	4	0.96635	0.92199	1	18728	0	2.7744	0.020523	0.10662	1	1500	3	2.7744
Clcn1	4	0.54323	0.71387	1	13688	1	2.7523	0.020545	0.10697	1	1501	3	2.7523
Adgrb1	4	0.81659	0.82666	1	16684	1	3.1194	0.02057	0.10731	1	1502	3	3.1194
Nrk	4	0.28491	0.55955	1	9865	1	3.1052	0.020602	0.10731	1	1503	3	3.1052
Opn3	4	0.97939	0.95182	1	19045	0	2.1116	0.020608	0.10731	1	1504	4	2.1116
Trhr2	4	0.97938	0.95182	1	19044	0	2.5325	0.020616	0.10731	1	1505	4	2.5325
Ubash3a	4	0.97938	0.95182	1	19042	0	1.8314	0.020625	0.10731	1	1506	4	1.8314
Lama4	4	0.97936	0.95182	1	19041	0	2.203	0.020636	0.10731	1	1507	4	2.203
Bace2	4	0.97933	0.95182	1	19040	0	2.2713	0.020672	0.10731	1	1508	4	2.2713
Spesp1	4	0.97933	0.95182	1	19039	0	1.953	0.020674	0.10731	1	1509	4	1.953
Hyal4	4	0.81859	0.82666	1	16706	1	0.69021	0.020687	0.10731	1	1510	2	0.69021
Gchfr	4	0.9735	0.94245	1	18891	0	3.4648	0.02072	0.10731	1	1511	4	3.4648
Lrig3	4	0.61323	0.74604	1	14632	1	1.9067	0.020728	0.10731	1	1512	2	1.9067
Ptk6	4	0.022518	0.15802	1	1536	1	2.5557	0.02077	0.10731	1	1513	3	2.5557
Vmn1r218	4	0.44311	0.65624	1	12303	1	2.5299	0.020778	0.10731	1	1514	3	2.5299
Tmem210	4	0.445	0.65739	1	12341	1	2.7175	0.020786	0.10731	1	1515	3	2.7175
Trmt10b	4	0.97921	0.95182	1	19037	0	2.2859	0.020787	0.10731	1	1516	4	2.2859
Olfr251	4	0.97919	0.95182	1	19036	0	1.5724	0.020808	0.10731	1	1517	4	1.5724
Trpv3	4	0.030823	0.20363	1	2020	2	-2.2009	0.02082	0.10731	1	1518	2	-2.2009
Vipr1	4	0.25579	0.53027	1	9134	2	-0.87817	0.020868	0.10763	1	1519	2	-0.87817
Olfr1357	4	0.23153	0.5115	1	8508	3	-5.1567	0.02087	0.10763	1	1520	1	-5.1567
Efna5	4	0.9791	0.95182	1	19035	0	2.8205	0.020897	0.10794	1	1521	4	2.8205
Wnk1	4	0.80101	0.8243	1	16519	1	1.9195	0.020901	0.10794	1	1522	2	1.9195
Dgkz	4	0.45818	0.66311	1	12517	2	0.13453	0.02092	0.10794	1	1523	2	0.13453
Mal2	4	0.97907	0.95182	1	19033	0	2.7086	0.020927	0.10794	1	1524	4	2.7086
Slc17a8	4	0.70872	0.79305	1	15828	1	2.735	0.021015	0.10828	1	1525	3	2.735
Ros1	4	0.046686	0.23529	1	2953	2	-0.77413	0.02102	0.10828	1	1526	2	-0.77413
Ampd3	4	0.97897	0.95141	1	19031	0	1.4626	0.021031	0.10828	1	1527	4	1.4626
Ugcg	4	0.038237	0.21814	1	2488	2	-0.54632	0.02105	0.10828	1	1528	2	-0.54632
Mtnr1a	4	0.18181	0.45678	1	7262	1	0.58886	0.02107	0.10859	1	1529	2	0.58886
Phc1	4	0.53135	0.70302	1	13521	1	3.0467	0.021092	0.10859	1	1530	3	3.0467
Snrnp70	4	0.27543	0.54523	1	9621	3	-4.8205	0.02112	0.10859	1	1531	1	-4.8205
Cer1	4	0.97212	0.94002	1	18855	0	3.0398	0.021135	0.10859	1	1532	3	3.0398
Nr0b1	4	0.97886	0.95141	1	19030	0	1.6462	0.021143	0.10859	1	1533	4	1.6462
Selp	4	0.74795	0.80269	1	16091	1	3.4652	0.021166	0.10859	1	1534	3	3.4652
Tyrobp	4	0.532	0.70352	1	13533	2	-0.4327	0.02117	0.10859	1	1535	2	-0.4327
Itga1	4	0.50562	0.68948	1	13182	1	-0.45405	0.02122	0.10892	1	1536	2	-0.45405
Fam134b	4	0.64248	0.76334	1	15058	2	0.56933	0.02127	0.10938	1	1537	2	0.56933
Sema6b	4	0.97869	0.951	1	19029	0	1.6262	0.021307	0.10938	1	1538	4	1.6262
Scnn1g	4	0.64999	0.76606	1	15159	1	2.6292	0.021307	0.10938	1	1539	3	2.6292
Ttc39c	4	0.97869	0.951	1	19028	0	1.0567	0.021313	0.10938	1	1540	4	1.0567
Grm4	4	0.6583	0.76821	1	15263	1	2.6154	0.02134	0.1097	1	1541	3	2.6154
Ric3	4	0.97865	0.951	1	19027	0	0.87993	0.021349	0.1097	1	1542	4	0.87993
Ppm1d	4	0.76714	0.80807	1	16253	1	0.74928	0.021399	0.1097	1	1543	2	0.74928
Tex22	4	0.95138	0.89813	1	18466	0	0.96954	0.02142	0.11004	1	1544	3	0.96954
Gm1661	4	0.89623	0.86531	1	17575	1	2.6135	0.021449	0.11004	1	1545	3	2.6135
Ankrd50	4	0.80371	0.82509	1	16543	1	3.3844	0.021466	0.11004	1	1546	3	3.3844
Zc3h12b	4	0.22639	0.50467	1	8365	2	1.8588	0.021474	0.11004	1	1547	2	1.8588
Aqp5	4	0.91916	0.87533	1	17899	1	3.1447	0.021491	0.11052	1	1548	3	3.1447
Pth1r	4	0.82357	0.82819	1	16756	1	3.174	0.021508	0.11052	1	1549	3	3.174
Zbtb37	4	0.1594	0.4352	1	6650	2	-1.127	0.021566	0.11052	1	1550	2	-1.127
Gpr156	4	0.61948	0.75075	1	14723	1	3.3121	0.021567	0.11052	1	1551	3	3.3121
Olfr1216	4	0.06824	0.27269	1	4020	2	-1.4475	0.021569	0.11052	1	1552	2	-1.4475
Cd28	4	0.97843	0.95058	1	19024	0	1.8591	0.021571	0.11052	1	1553	4	1.8591
Myh7	4	0.63433	0.75876	1	14931	2	-0.017773	0.021575	0.11052	1	1554	2	-0.017773
Tcf15	4	0.51488	0.69292	1	13324	1	2.0514	0.021583	0.11052	1	1555	2	2.0514
Pglyrp1	4	0.63257	0.75848	1	14907	1	2.9292	0.021588	0.11052	1	1556	3	2.9292
Fign	4	0.87844	0.85614	1	17341	1	3.0754	0.021592	0.11052	1	1557	3	3.0754
Astl	4	0.97841	0.95058	1	19022	0	2.9859	0.021593	0.11052	1	1558	4	2.9859
Slc5a5	4	0.97839	0.95058	1	19021	0	2.4026	0.021614	0.11052	1	1559	4	2.4026
Hexdc	4	0.48448	0.67884	1	12880	1	2.6787	0.02163	0.11052	1	1560	3	2.6787
Areg	4	0.97837	0.95058	1	19020	0	2.0169	0.021631	0.11052	1	1561	4	2.0169
Mgl2	4	0.97837	0.95058	1	19019	0	1.0175	0.021634	0.11052	1	1562	4	1.0175
Dnase2a	4	0.50079	0.68729	1	13104	1	3.1907	0.021643	0.11052	1	1563	3	3.1907
Lbh	4	0.97831	0.95058	1	19016	0	2.0066	0.021689	0.11052	1	1564	4	2.0066
Fmo6	4	0.97347	0.94245	1	18890	0	2.7796	0.021698	0.11052	1	1565	4	2.7796
Gm6592	4	0.47949	0.67558	1	12808	1	2.3441	0.021709	0.11087	1	1566	3	2.3441
Elavl1	3	0.97827	0.95383	1	19015	0	2.2795	0.021727	0.08917	1	1567	3	2.2795
Myo1f	4	0.89686	0.86531	1	17583	1	3.7147	0.021784	0.11119	1	1568	3	3.7147
Prss40	4	0.9782	0.95014	1	19013	0	1.5448	0.021795	0.11119	1	1569	4	1.5448
I830012O16Rik	4	0.9782	0.95014	1	19012	0	1.7724	0.021798	0.11119	1	1570	4	1.7724
Mef2b	4	0.2168	0.49729	1	8137	3	-5.4116	0.021819	0.11119	1	1571	1	-5.4116
Ccdc144b	4	0.55333	0.71979	1	13824	2	-0.33642	0.021885	0.11189	1	1572	2	-0.33642
Kcne2	4	0.22775	0.50722	1	8408	1	3.1849	0.021893	0.11189	1	1573	3	3.1849
Morc2a	4	0.97804	0.94928	1	19011	0	2.7913	0.02196	0.11238	1	1574	4	2.7913
Drp2	4	0.96099	0.91066	1	18630	0	3.0919	0.02197	0.11238	1	1575	3	3.0919
Mtmr14	4	0.26463	0.53513	1	9344	1	2.862	0.02197	0.11238	1	1576	3	2.862
Bmp3	4	0.69684	0.78961	1	15752	1	2.2055	0.021978	0.11238	1	1577	2	2.2055
Chic1	4	0.004332	0.049332	1	343	2	-2.6786	0.022019	0.11238	1	1578	2	-2.6786
Adra1d	4	0.97798	0.94928	1	19010	0	1.8124	0.022023	0.11238	1	1579	4	1.8124
Kcnh7	4	0.97795	0.94928	1	19009	0	1.9887	0.022052	0.11238	1	1580	4	1.9887
Zfp40	4	0.1208	0.38004	1	5622	1	1.8931	0.022054	0.11238	1	1581	2	1.8931
Stx16	4	0.89536	0.86451	1	17563	1	2.8486	0.022055	0.11238	1	1582	3	2.8486
Sel1l3	4	0.40449	0.63767	1	11755	1	3.0984	0.02206	0.11238	1	1583	3	3.0984
Hmg20a	4	0.62661	0.75503	1	14834	2	0.0052402	0.022071	0.11238	1	1584	2	0.0052402
Olfr1410	4	0.23846	0.51259	1	8688	2	-0.51345	0.022118	0.11269	1	1585	2	-0.51345
Gap43	4	0.9778	0.94928	1	19006	0	1.0857	0.022201	0.11304	1	1586	4	1.0857
Pigt	4	0.49664	0.68317	1	13043	2	-1.9723	0.022268	0.11304	1	1587	2	-1.9723
Dnajc28	4	0.96169	0.912	1	18644	0	2.8155	0.022283	0.11337	1	1588	3	2.8155
Hsd17b3	4	0.97771	0.94928	1	19005	0	1.6725	0.022286	0.11337	1	1589	4	1.6725
Rad21l	4	0.97771	0.94928	1	19004	0	2.2948	0.022291	0.11337	1	1590	4	2.2948
Elmo2	4	0.494	0.68317	1	13013	1	2.8584	0.022317	0.11385	1	1591	3	2.8584
Btg1	4	0.97768	0.94928	1	19003	0	1.1381	0.022318	0.11385	1	1592	4	1.1381
Zfp784	4	0.34027	0.59607	1	10886	2	-1.5163	0.022318	0.11385	1	1593	2	-1.5163
Pgc	4	0.65658	0.76763	1	15243	2	-1.7616	0.022368	0.11385	1	1594	2	-1.7616
Sash3	4	0.97762	0.94928	1	19000	0	2.585	0.022379	0.11385	1	1595	4	2.585
Arhgap1	4	0.97761	0.94928	1	18999	0	1.5748	0.022391	0.11385	1	1596	4	1.5748
Emilin2	4	0.97755	0.94928	1	18998	0	2.3511	0.022449	0.11385	1	1597	4	2.3511
Adrb2	4	0.97755	0.94928	1	18997	0	2.2896	0.022453	0.11385	1	1598	4	2.2896
Lrrc16b	4	0.24116	0.51499	1	8755	1	2.6336	0.022455	0.11385	1	1599	3	2.6336
Fzd3	4	0.97752	0.94928	1	18996	0	2.422	0.022479	0.11436	1	1600	4	2.422
Depdc1b	4	0.97751	0.94928	1	18994	0	1.765	0.022491	0.11436	1	1601	4	1.765
Sh2d5	4	0.97751	0.94928	1	18993	0	2.1248	0.022494	0.11436	1	1602	4	2.1248
Fopnl	4	0.60537	0.74197	1	14515	1	1.1954	0.022518	0.11472	1	1603	3	1.1954
Olfr157	4	0.97746	0.94928	1	18992	0	2.7034	0.022541	0.11472	1	1604	4	2.7034
Cuedc2	4	0.44813	0.65797	1	12389	1	2.9088	0.022542	0.11472	1	1605	3	2.9088
Katnb1	4	0.18992	0.46766	1	7463	2	-4.1762	0.022567	0.11472	1	1606	1	-4.1762
Sez6l	4	0.97739	0.94928	1	18989	0	1.601	0.022609	0.11523	1	1607	4	1.601
Stxbp1	4	0.016768	0.1318	1	1183	2	-0.38116	0.022615	0.11523	1	1608	2	-0.38116
Lipk	4	0.97736	0.94928	1	18988	0	1.6006	0.022636	0.11523	1	1609	4	1.6006
Hormad1	4	0.50261	0.68786	1	13134	2	1.5468	0.02265	0.11523	1	1610	2	1.5468
Gipc2	4	0.97732	0.94928	1	18987	0	1.211	0.022678	0.11523	1	1611	4	1.211
Aldh1b1	4	0.067856	0.27269	1	4007	2	-1.4345	0.022684	0.11523	1	1612	2	-1.4345
Clec4b1	4	0.62598	0.75417	1	14824	1	2.7664	0.022685	0.11523	1	1613	3	2.7664
Cpeb2	4	0.97728	0.94928	1	18986	0	0.57243	0.022716	0.11523	1	1614	4	0.57243
Myl3	4	0.42412	0.6473	1	12053	1	2.2216	0.022795	0.11523	1	1615	2	2.2216
Knstrn	4	0.77712	0.81426	1	16324	1	-0.075026	0.022817	0.11523	1	1616	3	-0.075026
Itgb1bp2	4	0.97718	0.94928	1	18984	0	2.411	0.022823	0.11523	1	1617	4	2.411
Dact1	4	0.97716	0.94928	1	18983	0	1.8315	0.022838	0.11523	1	1618	4	1.8315
Ift122	4	0.13388	0.39611	1	5984	1	2.106	0.022867	0.11523	1	1619	2	2.106
Hsd17b6	4	0.97711	0.94928	1	18982	0	2.3734	0.022886	0.11523	1	1620	4	2.3734
St8sia4	4	0.97711	0.94928	1	18981	0	0.77272	0.022889	0.11523	1	1621	4	0.77272
Olfr45	4	0.57658	0.72925	1	14156	2	0.94594	0.022907	0.11523	1	1622	2	0.94594
B4galt5	4	0.67758	0.77864	1	15537	2	1.7424	0.022916	0.11523	1	1623	2	1.7424
St8sia6	4	0.97202	0.93954	1	18852	0	2.006	0.022917	0.11523	1	1624	3	2.006
Arfip1	4	0.30918	0.58117	1	10459	2	-2.602	0.022967	0.11556	1	1625	2	-2.602
Gm12886	4	0.45845	0.66311	1	12521	2	-0.50642	0.022984	0.11556	1	1626	2	-0.50642
Ch25h	4	0.97699	0.94887	1	18980	0	1.0458	0.023009	0.11556	1	1627	4	1.0458
Hecw1	4	0.039985	0.22085	1	2589	2	-3.2699	0.023016	0.11556	1	1628	1	-3.2699
Sypl	4	0.97696	0.94887	1	18979	0	2.5306	0.023035	0.11556	1	1629	4	2.5306
Zfp648	4	0.97694	0.94887	1	18977	0	1.521	0.023063	0.11556	1	1630	4	1.521
C1s1	4	0.97352	0.94245	1	18892	0	2.5981	0.023092	0.11625	1	1631	4	2.5981
Dnajc3	4	0.17731	0.45013	1	7137	2	-0.28871	0.023096	0.11625	1	1632	2	-0.28871
6330409D20Rik	4	0.068661	0.27269	1	4033	2	-1.301	0.023114	0.11663	1	1633	2	-1.301
Olfr1299	4	0.35243	0.60092	1	11046	2	-1.2452	0.023116	0.11663	1	1634	2	-1.2452
Shox2	4	0.81597	0.82666	1	16679	1	3.1086	0.023123	0.11698	1	1635	3	3.1086
Tac2	4	0.97687	0.94797	1	18976	0	3.1255	0.023129	0.11698	1	1636	4	3.1255
D2hgdh	4	0.80948	0.8259	1	16601	1	3.0441	0.023163	0.11698	1	1637	3	3.0441
Rplp0	4	0.62527	0.75416	1	14810	2	-3.1296	0.023166	0.11698	1	1638	2	-3.1296
Kctd9	4	0.41992	0.64507	1	12000	1	2.945	0.023167	0.11698	1	1639	3	2.945
Slc25a25	4	0.9768	0.94797	1	18975	0	1.2347	0.023198	0.11698	1	1640	4	1.2347
Tigd3	4	0.38483	0.61847	1	11486	1	3.3537	0.023211	0.11698	1	1641	3	3.3537
Lgr4	4	0.97679	0.94797	1	18974	0	2.2172	0.023213	0.11698	1	1642	4	2.2172
Arid3a	4	0.97676	0.94797	1	18973	0	1.7094	0.02324	0.11967	1	1643	4	1.7094
Lyar	4	0.35992	0.60929	1	11151	1	0.38541	0.023269	0.11967	1	1644	2	0.38541
Adam20	4	0.97671	0.94797	1	18972	0	3.0452	0.023286	0.12003	1	1645	4	3.0452
Slc2a5	4	0.90606	0.86762	1	17697	1	2.626	0.023287	0.12003	1	1646	3	2.626
Olfr736	4	0.96704	0.92319	1	18740	0	3.0389	0.023291	0.12003	1	1647	3	3.0389
Abhd17b	4	0.9767	0.94797	1	18971	0	1.2351	0.023304	0.12003	1	1648	4	1.2351
2610015P09Rik	4	0.49864	0.68472	1	13075	1	1.9566	0.023304	0.12003	1	1649	2	1.9566
Zzef1	4	0.49819	0.68421	1	13065	2	-2.407	0.023316	0.12003	1	1650	1	-2.407
Hspa13	4	0.82089	0.82819	1	16732	1	2.7189	0.023321	0.12003	1	1651	3	2.7189
Snn	4	0.20396	0.48767	1	7802	1	2.9333	0.023347	0.12003	1	1652	3	2.9333
Pdk4	4	0.51681	0.69579	1	13348	1	1.8222	0.023365	0.12003	1	1653	3	1.8222
Acox3	4	0.97663	0.94797	1	18970	0	2.2568	0.02337	0.12003	1	1654	4	2.2568
Mrgprb2	4	0.090514	0.33025	1	4718	2	-0.88379	0.023382	0.12003	1	1655	2	-0.88379
Olfr49	4	0.88348	0.85802	1	17416	1	3.2615	0.023419	0.12003	1	1656	3	3.2615
Tnp1	4	0.12094	0.38076	1	5626	1	2.4649	0.023465	0.12072	1	1657	3	2.4649
Slc7a15	4	0.9302	0.88373	1	18070	1	3.0127	0.023565	0.12106	1	1658	3	3.0127
Cyp3a59	4	0.91565	0.87453	1	17839	1	2.6293	0.023577	0.12106	1	1659	3	2.6293
Vmn2r79	4	0.9764	0.94754	1	18969	0	1.0345	0.023596	0.12106	1	1660	4	1.0345
Zfp260	4	0.97078	0.93494	1	18821	0	0.82298	0.023615	0.12106	1	1661	2	0.82298
Ttll7	4	0.97636	0.94754	1	18967	0	2.4281	0.023642	0.12106	1	1662	4	2.4281
Fam179a	4	0.81578	0.82666	1	16672	1	3.0726	0.023661	0.12106	1	1663	3	3.0726
Golga2	4	0.33324	0.59177	1	10796	2	-3.0757	0.023665	0.12106	1	1664	1	-3.0757
Galnt6	4	0.97633	0.94754	1	18965	0	2.0016	0.023672	0.12106	1	1665	4	2.0016
Il24	4	0.97632	0.94754	1	18964	0	2.0556	0.023678	0.12106	1	1666	4	2.0556
Mien1	4	0.9763	0.94754	1	18963	0	2.833	0.023703	0.12106	1	1667	4	2.833
Usp45	4	0.30521	0.57693	1	10365	1	1.2837	0.023714	0.12106	1	1668	3	1.2837
Mas1	4	0.23522	0.51184	1	8607	1	3.356	0.023722	0.12106	1	1669	3	3.356
C87436	4	0.7952	0.82043	1	16457	1	2.7336	0.023764	0.12106	1	1670	3	2.7336
Hnrnpdl	4	0.97622	0.94754	1	18962	0	1.8396	0.023776	0.12106	1	1671	4	1.8396
Tekt1	4	0.97621	0.94754	1	18961	0	1.1863	0.023789	0.12106	1	1672	4	1.1863
Erp27	4	0.9762	0.94754	1	18960	0	3.1204	0.023804	0.12156	1	1673	4	3.1204
Ldhal6b	4	0.92529	0.88145	1	17992	1	1.4237	0.023814	0.12156	1	1674	3	1.4237
Prss21	4	0.59262	0.73529	1	14356	2	-0.2728	0.023827	0.12156	1	1675	2	-0.2728
Avpr1a	4	0.97617	0.94754	1	18959	0	2.4087	0.023832	0.12156	1	1676	4	2.4087
Tmem52b	4	0.45258	0.66074	1	12453	1	3.1566	0.023836	0.12189	1	1677	3	3.1566
Usp13	4	0.97556	0.9471	1	18940	0	2.9923	0.023884	0.12224	1	1678	4	2.9923
Pcdhga2	4	0.97611	0.9471	1	18958	0	2.3791	0.023893	0.12224	1	1679	4	2.3791
4833427G06Rik	4	0.85969	0.84609	1	17125	1	2.3484	0.023897	0.12224	1	1680	3	2.3484
Acox1	3	0.9761	0.94893	1	18957	0	2.4198	0.023899	0.095632	1	1681	3	2.4198
Ppl	4	0.97609	0.9471	1	18956	0	1.6911	0.023909	0.12224	1	1682	4	1.6911
Gja8	4	0.45433	0.66074	1	12475	2	-1.5034	0.023914	0.12224	1	1683	2	-1.5034
Mkks	4	0.94519	0.89584	1	18351	0	3.16	0.02392	0.12224	1	1684	3	3.16
Penk	4	0.97608	0.9471	1	18955	0	1.441	0.023924	0.12224	1	1685	4	1.441
Diras1	4	0.97605	0.9471	1	18954	0	2.2304	0.023949	0.12224	1	1686	4	2.2304
Olfr1115	4	0.77066	0.81041	1	16280	1	2.9239	0.023951	0.12224	1	1687	3	2.9239
Sgcb	4	0.97604	0.9471	1	18953	0	2.0991	0.023958	0.12224	1	1688	4	2.0991
Nanog	4	0.67952	0.77865	1	15559	1	3.2988	0.023964	0.12224	1	1689	3	3.2988
Tnfrsf18	4	0.97603	0.9471	1	18952	0	2.5897	0.023968	0.12224	1	1690	4	2.5897
Ccdc152	4	0.97602	0.9471	1	18951	0	2.4929	0.023977	0.12224	1	1691	4	2.4929
Cts8	4	0.43429	0.65177	1	12179	2	-0.61864	0.024013	0.12274	1	1692	2	-0.61864
Crybb1	4	0.97598	0.9471	1	18950	0	0.95718	0.024022	0.12274	1	1693	4	0.95718
Zswim4	4	0.55604	0.72164	1	13854	1	2.8576	0.024055	0.12274	1	1694	3	2.8576
Nxph4	4	0.17012	0.44249	1	6940	1	1.4785	0.024063	0.12274	1	1695	3	1.4785
Tst	4	0.58188	0.73231	1	14223	1	2.1508	0.02409	0.1231	1	1696	2	2.1508
Dtd2	4	0.89167	0.86296	1	17518	1	2.3564	0.0241	0.1231	1	1697	3	2.3564
Cort	4	0.9759	0.9471	1	18949	0	1.6133	0.024101	0.1231	1	1698	4	1.6133
Syngr3	4	0.079151	0.30444	1	4363	3	-3.9953	0.024113	0.1231	1	1699	1	-3.9953
Tmem38a	4	0.53761	0.70951	1	13613	1	2.7693	0.024163	0.1231	1	1700	3	2.7693
Smyd2	4	0.97582	0.9471	1	18947	0	0.47445	0.024178	0.1231	1	1701	4	0.47445
Rnf139	4	0.97582	0.9471	1	18946	0	2.1905	0.024185	0.1231	1	1702	4	2.1905
Pms2	3	0.11116	0.32258	1	5326	1	3.8333	0.024199	0.096834	1	1703	2	3.8333
Sult5a1	4	0.12118	0.3826	1	5635	2	-0.79096	0.024213	0.1231	1	1704	2	-0.79096
Ccnl2	4	0.56035	0.72318	1	13924	1	2.9977	0.024218	0.1231	1	1705	3	2.9977
Gm9992	4	0.97577	0.9471	1	18945	0	1.6848	0.024225	0.1231	1	1706	4	1.6848
Agmat	4	0.84182	0.83824	1	16937	1	3.5489	0.024227	0.1231	1	1707	3	3.5489
Slc35c2	4	0.54778	0.71605	1	13750	2	-0.39837	0.02424	0.1231	1	1708	2	-0.39837
Hnf4g	4	0.36168	0.6093	1	11173	2	0.49584	0.024263	0.1231	1	1709	2	0.49584
Syde2	4	0.9757	0.9471	1	18943	0	1.2746	0.024303	0.1231	1	1710	4	1.2746
Lzic	4	0.2478	0.5196	1	8925	1	2.904	0.024313	0.1231	1	1711	3	2.904
Megf8	4	0.97565	0.9471	1	18942	0	1.0353	0.024347	0.1231	1	1712	4	1.0353
Zdbf2	4	0.46642	0.66665	1	12635	1	3.5026	0.024358	0.1231	1	1713	3	3.5026
1700066B19Rik	4	0.26027	0.53172	1	9235	1	2.9974	0.024408	0.1231	1	1714	3	2.9974
Clec4b2	4	0.098851	0.34315	1	4957	2	-2.2417	0.024412	0.1231	1	1715	2	-2.2417
Fuca1	4	0.97557	0.9471	1	18941	0	2.1848	0.024431	0.1231	1	1716	4	2.1848
Olfr1313	4	0.97555	0.9471	1	18939	0	1.5209	0.024447	0.1231	1	1717	4	1.5209
Pcsk5	4	0.97555	0.9471	1	18938	0	2.2196	0.024453	0.1231	1	1718	4	2.2196
Bcl2l10	4	0.56737	0.72682	1	14018	1	3.0036	0.024454	0.1231	1	1719	3	3.0036
Kif26b	4	0.70816	0.79266	1	15821	1	2.7805	0.024472	0.1231	1	1720	3	2.7805
Syn3	4	0.97552	0.9471	1	18937	0	2.0661	0.024479	0.1231	1	1721	4	2.0661
Jph1	4	0.13339	0.39543	1	5975	3	-5.8264	0.024512	0.1231	1	1722	1	-5.8264
Gm5414	4	0.8179	0.82666	1	16702	1	2.9544	0.024513	0.1231	1	1723	3	2.9544
Il22	4	0.84161	0.83824	1	16936	1	2.318	0.024605	0.12379	1	1724	3	2.318
Cebpa	4	0.14077	0.40503	1	6167	2	-0.60009	0.024611	0.12379	1	1725	2	-0.60009
Xaf1	4	0.87759	0.85614	1	17333	1	2.63	0.024614	0.12379	1	1726	3	2.63
Uhrf2	4	0.85143	0.8437	1	17026	1	2.9018	0.024629	0.12414	1	1727	3	2.9018
Skiv2l2	3	0.84893	0.79058	1	17005	1	-2.6176	0.02463	0.098403	1	1728	1	-2.6176
Kctd11	4	0.19319	0.47062	1	7550	1	3.1304	0.024632	0.12414	1	1729	3	3.1304
1700112E06Rik	4	0.68932	0.78578	1	15700	1	3.0548	0.024651	0.12415	1	1730	3	3.0548
Ngfrap1	4	0.00088782	0.017776	1	87	2	1.0907	0.024656	0.12415	1	1731	2	1.0907
Spdyb	4	0.97532	0.94622	1	18935	0	1.2665	0.024683	0.12687	1	1732	4	1.2665
AA792892	4	0.97529	0.94622	1	18934	0	0.38459	0.024705	0.12687	1	1733	4	0.38459
Zfp81	4	0.21167	0.49149	1	8000	3	-5.0466	0.024711	0.12687	1	1734	1	-5.0466
Arid3b	4	0.25546	0.53027	1	9120	1	2.7566	0.024729	0.12687	1	1735	3	2.7566
Manea	4	0.45791	0.6619	1	12513	1	3.7686	0.024736	0.12687	1	1736	3	3.7686
Gramd2	4	0.22775	0.50722	1	8410	2	-4.4051	0.024761	0.12687	1	1737	1	-4.4051
Tmem190	4	0.45772	0.6619	1	12511	1	3.3518	0.024775	0.12687	1	1738	3	3.3518
Slc9c1	4	0.97522	0.94622	1	18933	0	1.5267	0.024778	0.12687	1	1739	4	1.5267
Egr4	4	0.97522	0.94622	1	18932	0	1.5077	0.024781	0.12687	1	1740	4	1.5077
Pml	4	0.70122	0.79038	1	15783	1	1.8328	0.024799	0.12687	1	1741	2	1.8328
Sdf4	4	0.025947	0.17237	1	1744	2	-3.4854	0.02481	0.12687	1	1742	2	-3.4854
Sdr9c7	4	0.83541	0.83358	1	16874	1	2.8532	0.02483	0.12687	1	1743	3	2.8532
Gm5885	4	0.81439	0.82666	1	16655	1	3.0501	0.024834	0.12687	1	1744	3	3.0501
Calml4	4	0.037349	0.21712	1	2432	2	-0.36422	0.02486	0.12687	1	1745	2	-0.36422
Tmem42	4	0.97514	0.94622	1	18931	0	3.3132	0.024864	0.12687	1	1746	4	3.3132
Col3a1	4	0.97512	0.94622	1	18930	0	2.1314	0.02488	0.12687	1	1747	4	2.1314
Cep68	4	0.97511	0.94622	1	18929	0	2.7811	0.024889	0.12687	1	1748	4	2.7811
Usp38	4	0.9751	0.94622	1	18928	0	0.9535	0.024902	0.12687	1	1749	4	0.9535
Pdia6	4	0.86988	0.85306	1	17242	1	3.102	0.024908	0.12687	1	1750	3	3.102
Sema6d	4	0.34363	0.5979	1	10921	2	-2.555	0.02491	0.12687	1	1751	2	-2.555
Gm6880	4	0.97504	0.94622	1	18927	0	0.98035	0.024963	0.12687	1	1752	4	0.98035
Coq10a	4	0.11468	0.3654	1	5447	1	3.2011	0.024977	0.12687	1	1753	3	3.2011
Capn2	4	0.97501	0.94622	1	18926	0	1.5596	0.024991	0.12687	1	1754	4	1.5596
Clspn	4	0.93293	0.88639	1	18117	1	-0.71451	0.02501	0.12687	1	1755	2	-0.71451
Piezo2	4	0.97494	0.94622	1	18925	0	2.7073	0.025055	0.12687	1	1756	4	2.7073
Cabp7	4	0.70415	0.79113	1	15807	1	3.218	0.025098	0.12687	1	1757	3	3.218
Jmjd7	4	0.080143	0.30444	1	4390	3	-5.4372	0.025109	0.1272	1	1758	1	-5.4372
Agrp	4	0.29428	0.5687	1	10085	1	2.0721	0.025111	0.1272	1	1759	2	2.0721
Olfr460	4	0.66163	0.77042	1	15301	1	3.495	0.025126	0.1272	1	1760	3	3.495
Riok3	4	0.032606	0.20617	1	2131	1	2.5885	0.025138	0.12756	1	1761	3	2.5885
Gata5	4	0.36582	0.61108	1	11226	2	-2.3186	0.025209	0.12756	1	1762	2	-2.3186
Olfr1389	4	0.94455	0.89509	1	18343	0	2.9049	0.02521	0.12756	1	1763	3	2.9049
Prkar1b	4	0.32272	0.58491	1	10673	2	0.68798	0.025219	0.12756	1	1764	2	0.68798
Polr3g	4	0.97062	0.93442	1	18817	0	2.9834	0.025223	0.12756	1	1765	3	2.9834
1600014K23Rik	4	0.97477	0.94534	1	18923	0	2.8486	0.025235	0.12756	1	1766	4	2.8486
S100a6	4	0.6407	0.76334	1	15029	2	1.1126	0.025259	0.12756	1	1767	2	1.1126
Dydc2	4	0.96952	0.93171	1	18799	0	2.9283	0.025279	0.12793	1	1768	3	2.9283
Ndufa4l2	4	0.81918	0.82666	1	16718	1	3.409	0.025282	0.12793	1	1769	3	3.409
Mocs1	4	0.97468	0.94487	1	18922	0	1.5839	0.025315	0.12793	1	1770	4	1.5839
Tuba8	4	0.97464	0.94441	1	18921	0	1.231	0.025357	0.12829	1	1771	4	1.231
Dkk1	4	0.90037	0.86606	1	17631	1	2.8875	0.025381	0.12881	1	1772	3	2.8875
Wbp2	4	0.21167	0.49149	1	8001	3	-5.3375	0.025408	0.12881	1	1773	1	-5.3375
9330182O14Rik	4	0.73501	0.79956	1	15999	1	0.23788	0.025458	0.12917	1	1774	2	0.23788
Tspo2	4	0.73372	0.79956	1	15993	1	2.7968	0.025503	0.12955	1	1775	3	2.7968
Vegfc	4	0.18914	0.46766	1	7438	1	-1.2567	0.025508	0.12955	1	1776	2	-1.2567
Pcnxl3	4	0.88014	0.85765	1	17370	1	2.6973	0.025516	0.12955	1	1777	3	2.6973
Plxnb2	4	0.92882	0.88373	1	18047	1	2.4753	0.025536	0.1299	1	1778	3	2.4753
Ino80d	4	0.97443	0.94347	1	18920	0	2.0029	0.025567	0.1299	1	1779	4	2.0029
Olfr518	4	0.8124	0.82666	1	16637	1	2.4155	0.025573	0.1299	1	1780	3	2.4155
Dnase1l2	4	0.97441	0.94347	1	18919	0	1.9522	0.025585	0.1299	1	1781	4	1.9522
Cd47	4	0.9744	0.94347	1	18918	0	1.121	0.0256	0.13025	1	1782	4	1.121
Acaa1b	4	0.5659	0.72474	1	13999	1	0.92676	0.025607	0.13025	1	1783	2	0.92676
Olfr1271	4	0.97438	0.94347	1	18917	0	0.74877	0.025621	0.13025	1	1784	4	0.74877
Zdhhc22	4	0.33541	0.59177	1	10827	1	3.6062	0.025644	0.13025	1	1785	3	3.6062
Krtap19-3	4	0.52266	0.69904	1	13413	1	1.6929	0.02567	0.13025	1	1786	2	1.6929
Col23a1	4	0.60983	0.74356	1	14578	2	-2.1187	0.025707	0.13025	1	1787	2	-2.1187
Car11	4	0.72579	0.79882	1	15938	1	2.5261	0.025738	0.13025	1	1788	3	2.5261
Tcp11l2	4	0.76277	0.80655	1	16222	1	2.6529	0.025742	0.13025	1	1789	3	2.6529
Alcam	4	0.36784	0.6117	1	11257	1	2.9566	0.025766	0.13025	1	1790	3	2.9566
4933402N03Rik	4	0.97422	0.94347	1	18916	0	1.2685	0.025782	0.13025	1	1791	4	1.2685
BC035044	4	0.5773	0.72986	1	14169	2	-0.33127	0.025797	0.13025	1	1792	2	-0.33127
Arid4b	4	0.95416	0.90099	1	18519	0	3.3806	0.025799	0.13025	1	1793	3	3.3806
Gabre	4	0.90957	0.87221	1	17745	1	2.7465	0.025813	0.13025	1	1794	3	2.7465
Efnb1	4	0.045045	0.23323	1	2861	1	2.0845	0.025833	0.13025	1	1795	2	2.0845
Pygm	4	0.18534	0.46048	1	7343	2	-3.2765	0.025856	0.13025	1	1796	1	-3.2765
Igdcc3	4	0.97411	0.94347	1	18914	0	2.3657	0.02589	0.13025	1	1797	4	2.3657
Col20a1	4	0.2314	0.5115	1	8506	1	3.2445	0.025898	0.13025	1	1798	3	3.2445
Gripap1	4	0.49574	0.68317	1	13029	1	1.3489	0.025906	0.13025	1	1799	3	1.3489
Wnt1	4	0.57739	0.72986	1	14170	1	1.571	0.025951	0.13072	1	1800	2	1.571
Atxn3	4	0.55739	0.72259	1	13872	2	0.94336	0.025955	0.13072	1	1801	2	0.94336
Gm11568	3	0.97404	0.94458	1	18912	0	2.4551	0.025961	0.10331	1	1802	3	2.4551
Nyap2	4	0.12641	0.38789	1	5774	2	0.015316	0.025969	0.13072	1	1803	2	0.015316
Olfr10	4	0.97402	0.94347	1	18911	0	1.3627	0.025979	0.13072	1	1804	4	1.3627
Ppp1r14c	4	0.97401	0.94347	1	18910	0	2.1397	0.025995	0.13072	1	1805	4	2.1397
Oas1d	4	0.97399	0.94347	1	18909	0	1.4721	0.026008	0.13072	1	1806	4	1.4721
Olfr905	4	0.91715	0.87454	1	17866	1	0.11388	0.026033	0.13072	1	1807	2	0.11388
Olfr1428	4	0.80534	0.82509	1	16559	1	2.5665	0.02605	0.1311	1	1808	3	2.5665
Olfr1275	4	0.97395	0.94298	1	18908	0	1.472	0.026051	0.1311	1	1809	4	1.472
Colq	4	0.97082	0.93494	1	18824	0	3.0095	0.026051	0.1311	1	1810	3	3.0095
Meis2	4	0.044383	0.23206	1	2819	1	2.1973	0.026055	0.1311	1	1811	3	2.1973
Otud1	4	0.56214	0.72379	1	13951	2	1.1514	0.026154	0.13153	1	1812	2	1.1514
Gm2799	4	0.97383	0.94245	1	18905	0	1.1934	0.026173	0.13153	1	1813	4	1.1934
Orm2	4	0.97383	0.94245	1	18906	0	0.27733	0.026173	0.13153	1	1814	4	0.27733
Tmc1	4	0.40107	0.63485	1	11706	1	2.9532	0.026173	0.13153	1	1815	3	2.9532
Rnf149	4	0.47027	0.66843	1	12685	1	3.0308	0.026178	0.13153	1	1816	3	3.0308
Shd	4	0.76735	0.80807	1	16254	1	3.4107	0.026187	0.13187	1	1817	3	3.4107
Itgb1	4	0.82146	0.82819	1	16739	1	2.3264	0.026197	0.13187	1	1818	3	2.3264
Wdr38	4	0.083172	0.31061	1	4488	3	-5.975	0.026204	0.13187	1	1819	1	-5.975
4932438H23Rik	4	0.11688	0.37162	1	5502	1	2.5499	0.026216	0.13187	1	1820	3	2.5499
Stab1	4	0.97378	0.94245	1	18903	0	0.96441	0.026222	0.13187	1	1821	4	0.96441
Myl7	4	0.29726	0.57069	1	10176	2	-0.93149	0.026234	0.13187	1	1822	2	-0.93149
Pfkfb2	4	0.97376	0.94245	1	18902	0	0.79644	0.026242	0.13187	1	1823	4	0.79644
Creb1	4	0.96973	0.93225	1	18803	0	3.7116	0.026245	0.13187	1	1824	3	3.7116
Zfml	4	0.28727	0.56122	1	9924	3	-5.1694	0.026254	0.13187	1	1825	1	-5.1694
Fbxo42	4	0.95811	0.90596	1	18577	0	2.3295	0.02627	0.13187	1	1826	3	2.3295
Synm	4	0.97373	0.94245	1	18901	0	2.7399	0.026272	0.13187	1	1827	4	2.7399
Gal3st2	4	0.97367	0.94245	1	18897	0	2.9059	0.026283	0.13187	1	1828	4	2.9059
Pcdha10	4	0.9737	0.94245	1	18900	0	2.4786	0.026302	0.13187	1	1829	4	2.4786
Heatr5a	4	0.97369	0.94245	1	18899	0	1.5402	0.026312	0.13187	1	1830	4	1.5402
Fbxw15	4	0.97368	0.94245	1	18898	0	2.3122	0.026315	0.13187	1	1831	4	2.3122
Unc79	4	0.92364	0.8807	1	17962	1	1.5558	0.026353	0.13259	1	1832	3	1.5558
Ndn	4	0.97361	0.94245	1	18895	0	0.60814	0.026391	0.13259	1	1833	4	0.60814
Sgce	4	0.66287	0.77042	1	15317	1	2.6971	0.026392	0.13259	1	1834	3	2.6971
Gucy2c	4	0.9736	0.94245	1	18894	0	1.3112	0.026398	0.13259	1	1835	4	1.3112
Sh2d1a	4	0.6699	0.77298	1	15422	1	0.4848	0.026403	0.13259	1	1836	2	0.4848
Dusp28	2	0.91712	0.86259	1	17864	0	4.0108	0.026428	0.061109	1	1837	2	4.0108
Sbf1	4	0.97356	0.94245	1	18893	0	1.1584	0.026441	0.13259	1	1838	4	1.1584
Prrc2c	4	0.43376	0.65006	1	12172	1	3.1089	0.026445	0.13259	1	1839	3	3.1089
Olfr69	4	0.81771	0.82666	1	16696	1	0.54718	0.026453	0.13259	1	1840	2	0.54718
Gpr4	4	0.076036	0.29557	1	4273	1	1.9284	0.026552	0.13345	1	1841	3	1.9284
Tnrc18	4	0.97344	0.94245	1	18889	0	3.3333	0.026561	0.13398	1	1842	4	3.3333
Cst11	4	0.9132	0.8738	1	17807	1	3.1551	0.026589	0.13449	1	1843	3	3.1551
Olfr112	4	0.76497	0.80655	1	16241	1	3.1702	0.026599	0.13449	1	1844	3	3.1702
2210010C04Rik	4	0.94605	0.89584	1	18363	0	2.4436	0.026632	0.13484	1	1845	3	2.4436
Kif1b	4	0.74521	0.80112	1	16062	1	3.0929	0.026652	0.13556	1	1846	3	3.0929
Grn	4	0.50668	0.6907	1	13200	1	3.2881	0.026661	0.13556	1	1847	3	3.2881
Ate1	4	0.73261	0.79956	1	15979	1	3.3184	0.026684	0.13556	1	1848	3	3.3184
Muc5ac	4	0.95959	0.90903	1	18603	0	2.9961	0.026738	0.13556	1	1849	3	2.9961
Tmem218	4	0.65036	0.76705	1	15166	1	1.6109	0.026748	0.13556	1	1850	2	1.6109
Naif1	4	0.23859	0.5129	1	8692	2	0.70965	0.026776	0.13556	1	1851	2	0.70965
Adam21	4	0.54995	0.71791	1	13781	2	1.7851	0.026831	0.13556	1	1852	2	1.7851
Glis1	4	0.51269	0.69231	1	13297	1	2.935	0.026835	0.13556	1	1853	3	2.935
Prl7c1	4	0.41348	0.64445	1	11904	2	-0.10505	0.026851	0.13556	1	1854	2	-0.10505
Slc30a8	4	0.47436	0.67105	1	12731	1	2.37	0.026877	0.13556	1	1855	3	2.37
Itgal	4	0.94644	0.89584	1	18372	0	2.1728	0.026905	0.13556	1	1856	3	2.1728
Lcn5	4	0.37474	0.61547	1	11351	1	2.8576	0.02695	0.13608	1	1857	3	2.8576
Ces1a	4	0.85731	0.84448	1	17094	1	2.5955	0.027024	0.1366	1	1858	3	2.5955
C1qa	4	0.076909	0.29953	1	4298	3	-4.0887	0.02705	0.1366	1	1859	1	-4.0887
Cdkn2d	4	0.91203	0.87221	1	17783	1	2.7715	0.027053	0.1366	1	1860	3	2.7715
Bmpr2	4	0.31223	0.58117	1	10533	3	-3.8777	0.027099	0.1366	1	1861	1	-3.8777
Olfr1040	4	0.94669	0.89584	1	18380	0	2.3586	0.027242	0.1366	1	1862	3	2.3586
Map3k15	4	0.30778	0.57953	1	10420	2	0.75339	0.027248	0.1366	1	1863	2	0.75339
Ctcfl	4	0.1506	0.4218	1	6419	1	3.2077	0.027276	0.1366	1	1864	3	3.2077
Atp6v1e1	4	0.8023	0.8243	1	16531	1	-3.5155	0.027298	0.1366	1	1865	1	-3.5155
Pde3a	4	0.38619	0.61847	1	11515	2	-1.0196	0.027322	0.13697	1	1866	2	-1.0196
Fam214a	4	0.88549	0.85994	1	17442	1	1.3223	0.027348	0.13697	1	1867	2	1.3223
Ncf4	4	0.16561	0.43977	1	6827	2	-1.0726	0.027369	0.13697	1	1868	2	-1.0726
Tgfbr3	4	0.68097	0.77921	1	15585	1	3.0168	0.027404	0.13774	1	1869	3	3.0168
Hspb3	4	0.8112	0.82666	1	16622	1	3.151	0.027438	0.13774	1	1870	3	3.151
Zfr2	4	0.21687	0.49729	1	8142	2	-3.1572	0.027447	0.13774	1	1871	1	-3.1572
Ephb2	4	0.81556	0.82666	1	16669	1	2.8356	0.02749	0.13774	1	1872	3	2.8356
Vmn2r58	4	0.96882	0.92955	1	18780	0	1.4445	0.027497	0.13774	1	1873	2	1.4445
1700047I17Rik2	4	0.84284	0.83824	1	16942	1	3.5209	0.027521	0.13774	1	1874	3	3.5209
Mapk13	4	0.93424	0.88829	1	18138	1	2.9319	0.027526	0.13774	1	1875	3	2.9319
2006-09-01	4	0.038518	0.21814	1	2504	3	-6.5274	0.027547	0.13774	1	1876	1	-6.5274
Ryr1	4	0.91422	0.8738	1	17823	1	2.6261	0.027556	0.13774	1	1877	3	2.6261
Dopey1	4	0.73201	0.79956	1	15974	1	2.3022	0.027584	0.13774	1	1878	3	2.3022
Slc2a13	4	0.50006	0.68624	1	13093	2	-1.81	0.027596	0.13774	1	1879	1	-1.81
Wwox	4	0.67161	0.77337	1	15445	1	2.5946	0.027615	0.13774	1	1880	3	2.5946
Wfdc5	3	0.85685	0.79765	1	17084	1	3.6813	0.027622	0.1088	1	1881	2	3.6813
Dmrtb1	4	0.78016	0.81581	1	16345	1	3.0679	0.027624	0.13774	1	1882	3	3.0679
Cryl1	4	0.51219	0.69231	1	13283	1	1.9667	0.027646	0.13774	1	1883	3	1.9667
Ncam2	4	0.53039	0.70252	1	13507	2	-0.59525	0.027649	0.13774	1	1884	2	-0.59525
Lims2	4	0.016893	0.13339	1	1187	1	2.4329	0.027698	0.13774	1	1885	3	2.4329
Fbxw8	4	0.78191	0.81658	1	16361	1	2.5766	0.027743	0.13774	1	1886	3	2.5766
Fam136a	4	0.29759	0.57102	1	10183	2	-2.0306	0.027745	0.13774	1	1887	2	-2.0306
Pdlim3	4	0.80781	0.8259	1	16582	1	0.58454	0.027795	0.13825	1	1888	2	0.58454
Gm5901	4	0.94017	0.89211	1	18257	0	2.4824	0.027856	0.13879	1	1889	3	2.4824
Vmn1r235	4	0.61	0.74356	1	14583	1	2.9087	0.027861	0.13879	1	1890	3	2.9087
Rnf6	4	0.069948	0.27918	1	4078	2	-1.0463	0.027874	0.13879	1	1891	2	-1.0463
Phlpp1	4	0.7283	0.79882	1	15952	1	2.6743	0.027895	0.13879	1	1892	3	2.6743
Olfr1280	4	0.65736	0.76821	1	15253	1	2.9924	0.027921	0.13879	1	1893	3	2.9924
Vmn1r24	4	0.024412	0.16793	1	1640	2	1.3087	0.02794	0.13879	1	1894	2	1.3087
Focad	4	0.90715	0.86912	1	17712	1	2.8015	0.02796	0.14141	1	1895	3	2.8015
Upp2	4	0.43517	0.65207	1	12192	2	-0.93866	0.027996	0.14141	1	1896	2	-0.93866
Olfr56	4	0.61413	0.74818	1	14647	1	0.48505	0.028044	0.14141	1	1897	2	0.48505
Ldlrap1	4	0.30339	0.57693	1	10312	1	2.3502	0.028044	0.14141	1	1898	3	2.3502
Bpifc	4	0.43314	0.65006	1	12168	1	3.2388	0.028081	0.14141	1	1899	3	3.2388
Kdm4b	4	0.81659	0.82666	1	16685	1	2.9012	0.02809	0.14141	1	1900	3	2.9012
Chrna6	4	0.89729	0.86531	1	17590	1	2.6462	0.028093	0.14141	1	1901	3	2.6462
Pomp	4	0.89885	0.86606	1	17611	1	0.41467	0.028138	0.14141	1	1902	2	0.41467
BC029214	4	0.95813	0.90596	1	18578	0	2.6393	0.028143	0.14141	1	1903	3	2.6393
Zik1	4	0.56201	0.72379	1	13949	2	1.3718	0.028166	0.14141	1	1904	2	1.3718
Sdccag3	4	0.16908	0.44249	1	6920	2	-3.1931	0.028193	0.14141	1	1905	1	-3.1931
Tcerg1l	4	0.48785	0.68155	1	12923	1	1.7517	0.02827	0.14141	1	1906	2	1.7517
Defb6	4	0.54374	0.7145	1	13693	1	-1.425	0.028292	0.14141	1	1907	2	-1.425
Rpgr	4	0.80454	0.82509	1	16550	1	2.9444	0.028333	0.14141	1	1908	3	2.9444
Matn2	4	0.35502	0.60455	1	11078	1	2.4854	0.028338	0.14141	1	1909	3	2.4854
Nr2c1	4	0.16374	0.43866	1	6779	1	2.1688	0.028342	0.14141	1	1910	3	2.1688
Adam28	4	0.33275	0.59177	1	10791	2	1.5144	0.028345	0.14141	1	1911	2	1.5144
Tmem62	4	0.93475	0.88829	1	18147	1	2.7577	0.028373	0.14141	1	1912	3	2.7577
Il3ra	4	0.043076	0.22819	1	2752	2	-1.8699	0.028391	0.14141	1	1913	2	-1.8699
Vmn1r179	4	0.79648	0.82235	1	16474	1	2.6042	0.028413	0.14141	1	1914	3	2.6042
Bdkrb2	4	0.55108	0.71791	1	13793	1	2.2258	0.028459	0.14141	1	1915	3	2.2258
Cmya5	4	0.89487	0.86451	1	17556	1	2.5974	0.028484	0.14175	1	1916	3	2.5974
F2r	4	0.87182	0.85382	1	17258	1	1.0232	0.028491	0.14175	1	1917	3	1.0232
Klk11	4	0.97085	0.93494	1	18825	0	3.1025	0.028499	0.14229	1	1918	3	3.1025
Prok1	4	0.9684	0.92955	1	18776	0	1.4021	0.02854	0.14229	1	1919	2	1.4021
Upp1	4	0.40912	0.64335	1	11848	2	-0.86304	0.028563	0.14229	1	1920	2	-0.86304
Mxd3	4	0.0076929	0.073279	1	573	3	-4.3879	0.02859	0.14229	1	1921	1	-4.3879
Ccdc27	4	0.48911	0.68254	1	12940	2	-0.56113	0.02863	0.14229	1	1922	2	-0.56113
Serinc5	4	0.31022	0.58117	1	10478	2	-1.2681	0.02864	0.14229	1	1923	2	-1.2681
Uggt2	4	0.38009	0.61783	1	11427	1	3.1676	0.028687	0.14229	1	1924	3	3.1676
Zfp763	4	0.84455	0.83901	1	16956	1	1.6629	0.028689	0.14229	1	1925	3	1.6629
4922502D21Rik	4	0.036093	0.2156	1	2348	2	-1.6715	0.028739	0.14229	1	1926	2	-1.6715
Lrp11	4	0.1912	0.46922	1	7495	2	-1.2789	0.028744	0.14229	1	1927	2	-1.2789
Dnajb8	4	0.27327	0.5442	1	9575	2	-0.84464	0.028773	0.14229	1	1928	2	-0.84464
Nkiras2	4	0.40328	0.63661	1	11739	1	2.5459	0.02878	0.14229	1	1929	3	2.5459
Als2cr11	3	0.76	0.74813	1	16192	1	4.1195	0.028825	0.11178	1	1930	2	4.1195
Myo1c	4	0.74496	0.80112	1	16060	1	3.329	0.028858	0.14229	1	1931	3	3.329
Fer1l4	4	0.16343	0.43754	1	6771	2	-0.76204	0.029002	0.14321	1	1932	2	-0.76204
Abhd17a	4	0.45021	0.65905	1	12420	1	2.2638	0.029086	0.14359	1	1933	3	2.2638
Thbs1	4	0.067664	0.27269	1	4001	2	-1.3362	0.029116	0.14359	1	1934	2	-1.3362
Ppp1r3b	4	0.45114	0.66017	1	12433	2	-0.60463	0.029164	0.14359	1	1935	2	-0.60463
Cyp4a12b	4	0.18099	0.45678	1	7243	2	-1.2285	0.029203	0.14359	1	1936	2	-1.2285
Fgg	4	0.48025	0.67558	1	12820	1	2.0671	0.029222	0.14359	1	1937	2	2.0671
Spata18	4	0.96651	0.92259	1	18729	0	2.4449	0.029252	0.14359	1	1938	3	2.4449
Capn5	4	0.82544	0.82819	1	16778	1	2.6038	0.029277	0.14359	1	1939	3	2.6038
Usp6nl	4	0.83441	0.83358	1	16864	1	3.4304	0.029327	0.14359	1	1940	3	3.4304
Zfp606	4	0.082333	0.30885	1	4463	3	-6.107	0.029335	0.14359	1	1941	1	-6.107
Trnt1	4	0.81486	0.82666	1	16665	1	1.0051	0.029347	0.14396	1	1942	2	1.0051
Dnah6	4	0.67834	0.77864	1	15547	1	2.9589	0.029369	0.14396	1	1943	3	2.9589
Clec4e	3	0.97058	0.93765	1	18816	0	3.7228	0.029418	0.11394	1	1944	3	3.7228
Clcn4-2	4	0.09366	0.33418	1	4817	3	-6.2655	0.029434	0.14396	1	1945	1	-6.2655
Ttc8	4	0.63914	0.76215	1	15000	1	2.1296	0.029443	0.14396	1	1946	3	2.1296
Olfr571	4	0.77488	0.81274	1	16311	1	2.6104	0.029477	0.14448	1	1947	3	2.6104
Csn1s1	4	0.1099	0.35987	1	5284	2	-2.8022	0.029483	0.14448	1	1948	2	-2.8022
1700042G07Rik	3	0.050628	0.20331	1	3183	2	-6.8866	0.029489	0.11434	1	1949	1	-6.8866
Mtdh	4	0.54454	0.71508	1	13705	1	3.1611	0.029497	0.14448	1	1950	3	3.1611
Lhfpl3	4	0.95696	0.90315	1	18559	0	2.6877	0.029523	0.14448	1	1951	3	2.6877
Olfr1176	4	0.59959	0.73885	1	14441	2	-2.5734	0.029533	0.14448	1	1952	1	-2.5734
Pla2g5	4	0.39356	0.62835	1	11601	1	3.1007	0.029539	0.14448	1	1953	3	3.1007
Olfr479	4	0.65794	0.76821	1	15261	1	2.8429	0.029569	0.14448	1	1954	3	2.8429
Galnt7	4	0.30593	0.57916	1	10379	2	-2.4291	0.029583	0.14448	1	1955	2	-2.4291
Leprotl1	4	0.76766	0.80807	1	16257	1	2.7286	0.029607	0.14448	1	1956	3	2.7286
Egf	4	0.6058	0.7424	1	14521	1	2.9096	0.029632	0.14448	1	1957	3	2.9096
Fgd6	4	0.95946	0.90836	1	18601	0	3.5119	0.029645	0.14448	1	1958	3	3.5119
Nfkbid	4	0.82667	0.82895	1	16795	1	3.2191	0.029674	0.14484	1	1959	3	3.2191
Gm19402	4	0.66661	0.77202	1	15374	1	2.4976	0.029708	0.14522	1	1960	3	2.4976
Klhl1	4	0.095913	0.33828	1	4873	1	2.538	0.029732	0.14522	1	1961	3	2.538
Armc5	4	0.11755	0.37162	1	5520	2	-3.9934	0.02988	0.14523	1	1962	1	-3.9934
Olfr470	4	0.55765	0.72259	1	13881	2	1.4593	0.029897	0.14523	1	1963	2	1.4593
Derl1	4	0.40356	0.63661	1	11740	2	-0.69615	0.029945	0.14523	1	1964	2	-0.69615
Trpc2	4	0.86135	0.8476	1	17139	1	2.4931	0.02996	0.14523	1	1965	3	2.4931
Epb4.1	4	0.76989	0.80961	1	16273	1	2.0962	0.02998	0.14563	1	1966	3	2.0962
Rimkla	4	0.017324	0.13467	1	1207	2	-1.6903	0.030013	0.14563	1	1967	2	-1.6903
Lrrc28	4	0.31963	0.58363	1	10636	2	-1.9864	0.030029	0.14563	1	1968	2	-1.9864
9430007A20Rik	4	0.72541	0.79882	1	15935	1	2.9029	0.030042	0.14563	1	1969	3	2.9029
Akirin1	4	0.91307	0.8738	1	17803	1	2.6989	0.0301	0.14563	1	1970	3	2.6989
Jph2	4	0.0034829	0.043083	1	295	3	-6.2952	0.030128	0.14618	1	1971	1	-6.2952
Olfr1457	4	0.0065558	0.070288	1	508	3	-3.8425	0.030178	0.14618	1	1972	1	-3.8425
Rassf5	4	0.82939	0.82975	1	16819	1	3.1868	0.030178	0.14618	1	1973	3	3.1868
Ush2a	4	0.68587	0.7815	1	15673	1	2.8663	0.030188	0.14618	1	1974	3	2.8663
Slc38a7	4	0.95348	0.89956	1	18506	0	1.736	0.030228	0.14618	1	1975	2	1.736
Ankrd46	4	0.91849	0.87493	1	17889	1	2.9907	0.030235	0.14618	1	1976	3	2.9907
Phyhip	4	0.2949	0.56939	1	10112	1	1.8486	0.030246	0.14618	1	1977	2	1.8486
Mob3a	4	0.26875	0.54026	1	9458	2	0.43665	0.030256	0.14618	1	1978	2	0.43665
Nek5	4	0.65036	0.76705	1	15165	1	2.6516	0.030324	0.14618	1	1979	3	2.6516
Rhox2h	4	0.26642	0.53785	1	9396	2	-3.1429	0.030327	0.14618	1	1980	1	-3.1429
Gng7	4	0.37073	0.61297	1	11300	1	2.665	0.030345	0.14618	1	1981	3	2.665
Zkscan7	4	0.26493	0.53513	1	9359	2	-2.9382	0.030376	0.14618	1	1982	2	-2.9382
Cdip1	4	0.96761	0.92498	1	18755	0	2.9687	0.030381	0.14618	1	1983	3	2.9687
Nphs2	4	0.1007	0.34706	1	5019	1	-1.1057	0.030426	0.14618	1	1984	2	-1.1057
Mtx1	4	0.56658	0.72682	1	14009	2	0.31906	0.030451	0.14618	1	1985	2	0.31906
Zfp703	4	0.1089	0.35879	1	5256	2	-2.6984	0.030476	0.14618	1	1986	2	-2.6984
Irx4	4	0.35488	0.60455	1	11075	1	1.8821	0.03051	0.14618	1	1987	2	1.8821
Ppp2r5d	4	0.24327	0.51788	1	8808	3	-3.2136	0.030525	0.14618	1	1988	1	-3.2136
Defb7	4	0.63629	0.7596	1	14958	2	-0.25256	0.030529	0.14618	1	1989	2	-0.25256
Dst	4	0.12864	0.39154	1	5845	2	-1.3903	0.030559	0.14618	1	1990	2	-1.3903
Slc36a2	4	0.4235	0.64675	1	12047	1	3.131	0.030575	0.14618	1	1991	3	3.131
Ddc	4	0.41593	0.64507	1	11945	2	-0.8304	0.030575	0.14618	1	1992	1	-0.8304
Dlg2	4	0.29222	0.56706	1	10037	1	2.8723	0.03058	0.14618	1	1993	3	2.8723
Arsa	4	0.017067	0.13446	1	1195	3	-6.0584	0.030624	0.14618	1	1994	1	-6.0584
1700034E13Rik	4	0.96266	0.91329	1	18665	0	2.7627	0.030653	0.14656	1	1995	3	2.7627
Sucnr1	4	0.38544	0.61847	1	11501	2	-0.94518	0.030674	0.14656	1	1996	2	-0.94518
Olfr517	4	0.61413	0.74818	1	14646	1	2.909	0.030706	0.14693	1	1997	3	2.909
Pdgfrl	4	0.53651	0.70543	1	13599	1	2.3845	0.030721	0.14693	1	1998	3	2.3845
Myh2	4	0.056757	0.26065	1	3495	1	2.2849	0.030723	0.14693	1	1999	3	2.2849
[truncated: 17,675 more rows]
